# Supplementary material for: α-Aminophosphonate inhibitors of metallo-β-lactamases NDM-1 and VIM-2
Source: Royal Society of Chemistry journal article supplement (doi:10.1039/d3md00286a), 2023-01-01
Supplement: d3md00286a1.pdf [file d3md00286a1.pdf]

## Electronic Supplementary Material

### **$\alpha$ -Aminophosphonate inhibitors of metallo- $\beta$ -lactamases NDM-1 and VIM-2**

Katarzyna Palica,<sup>‡a</sup> Fritz Deufel,<sup>‡a</sup> Susann Skagseth,<sup>b</sup> Gabriela Paula Di Santo Metzler,<sup>c,d</sup>  
Johannes Thoma,<sup>c</sup> Anna Andersson Rasmussen,<sup>a</sup> Arto Valkonen,<sup>e</sup> Per Sunnerhagen,<sup>c</sup> Hanna-  
Kirsti S. Leiros,<sup>b</sup> Hanna Andersson,<sup>\*a</sup> and Mate Erdelyi<sup>\*a</sup>

<sup>†</sup> Department of Chemistry - BMC, Organic Chemistry; Uppsala University, Husargatan 3, 752 37  
Uppsala, Sweden

<sup>‡</sup> Department of Chemistry, Faculty of Science and Technology, UiT The Arctic University of Norway,  
N-9037 Tromsø, Norway

<sup>§</sup> Department of Chemistry & Molecular Biology, University of Gothenburg, Medicinaregatan 9C, 413 90  
Göteborg, Sweden

<sup>¶</sup> Center for Antibiotics Resistance Research (CARE) at University of Gothenburg, Medicinaregatan 9C,  
413 90 Göteborg, Sweden

<sup>Δ</sup> Department of Chemistry, University of Jyväskylä, Survantie 9B, 40014 University of Jyväskylä,  
Finland

\* E-mail: mate.erdelyi@kemi.uu.se, hanna.andersson@redglead.com

#### **Table of contents**

|                                                                                                     |      |
|-----------------------------------------------------------------------------------------------------|------|
| 1. Dose-response graphs.....                                                                        | S2   |
| 2. Cytotoxicity assay .....                                                                         | S14  |
| 3. Protein sequence alignment <sup>1</sup> .....                                                    | S18  |
| 4. NMR spectra of the synthesized compounds .....                                                   | S19  |
| 5. Crystallographic data .....                                                                      | S197 |
| 6. Chemical shift perturbation throughout the titration of NDM-1 and of VIM-2 with inhibitors ..... | S209 |
| 7. Chemical shift perturbation histograms .....                                                     | S230 |
| 8. Estimation of binding constants ( $K_d$ ) .....                                                  | S243 |
| 9. Linear correlation of chemical shift perturbation.....                                           | S245 |
| 10. Evaluation of the binding energies of the docking poses .....                                   | S257 |
| 11. The RMSD of atomic positions of the binding energies of the docking poses .....                 | S260 |
| 12. SDS-Page Analysis for <sup>15</sup> N-labelled NDM-1 and VIM-2.....                             | S261 |
| 13. Long term stability .....                                                                       | S264 |
| 14. References .....                                                                                | S268 |

## 1. Dose-response graphs

**Table S1.** The dose-response graphs for the enzymatic assay of the inhibitors against NDM-1, GIM-1 and VIM-2. For details, see the experimental section in the main text.

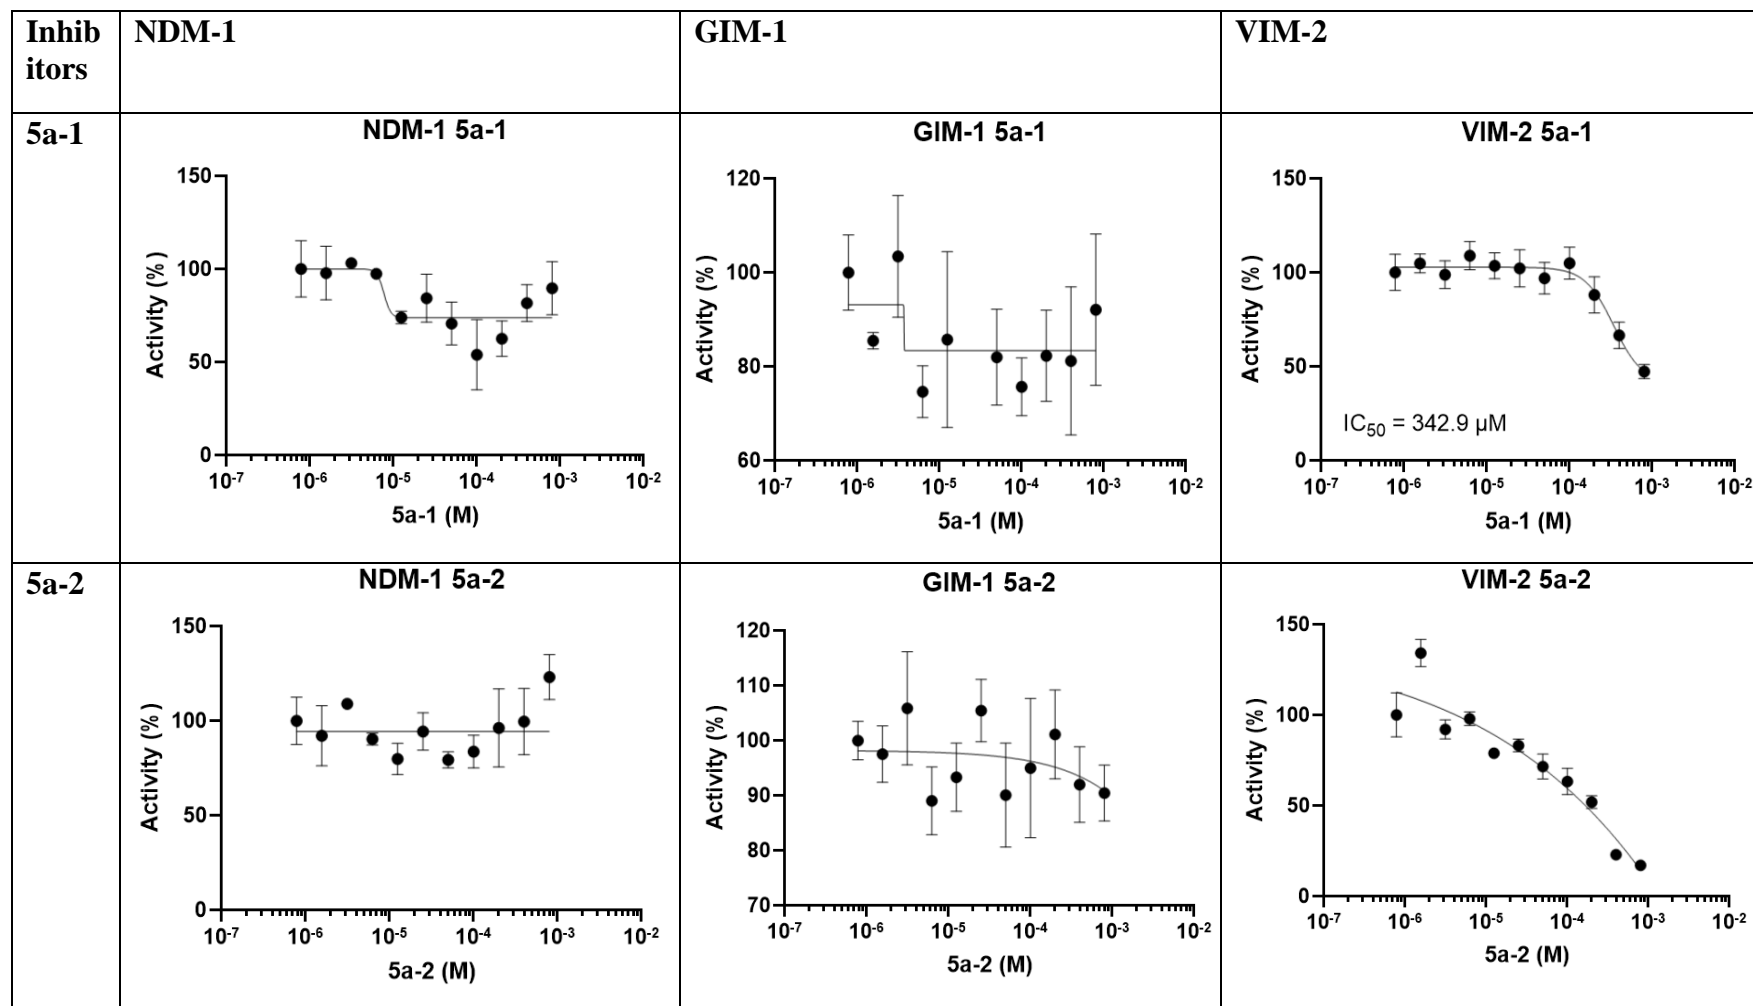

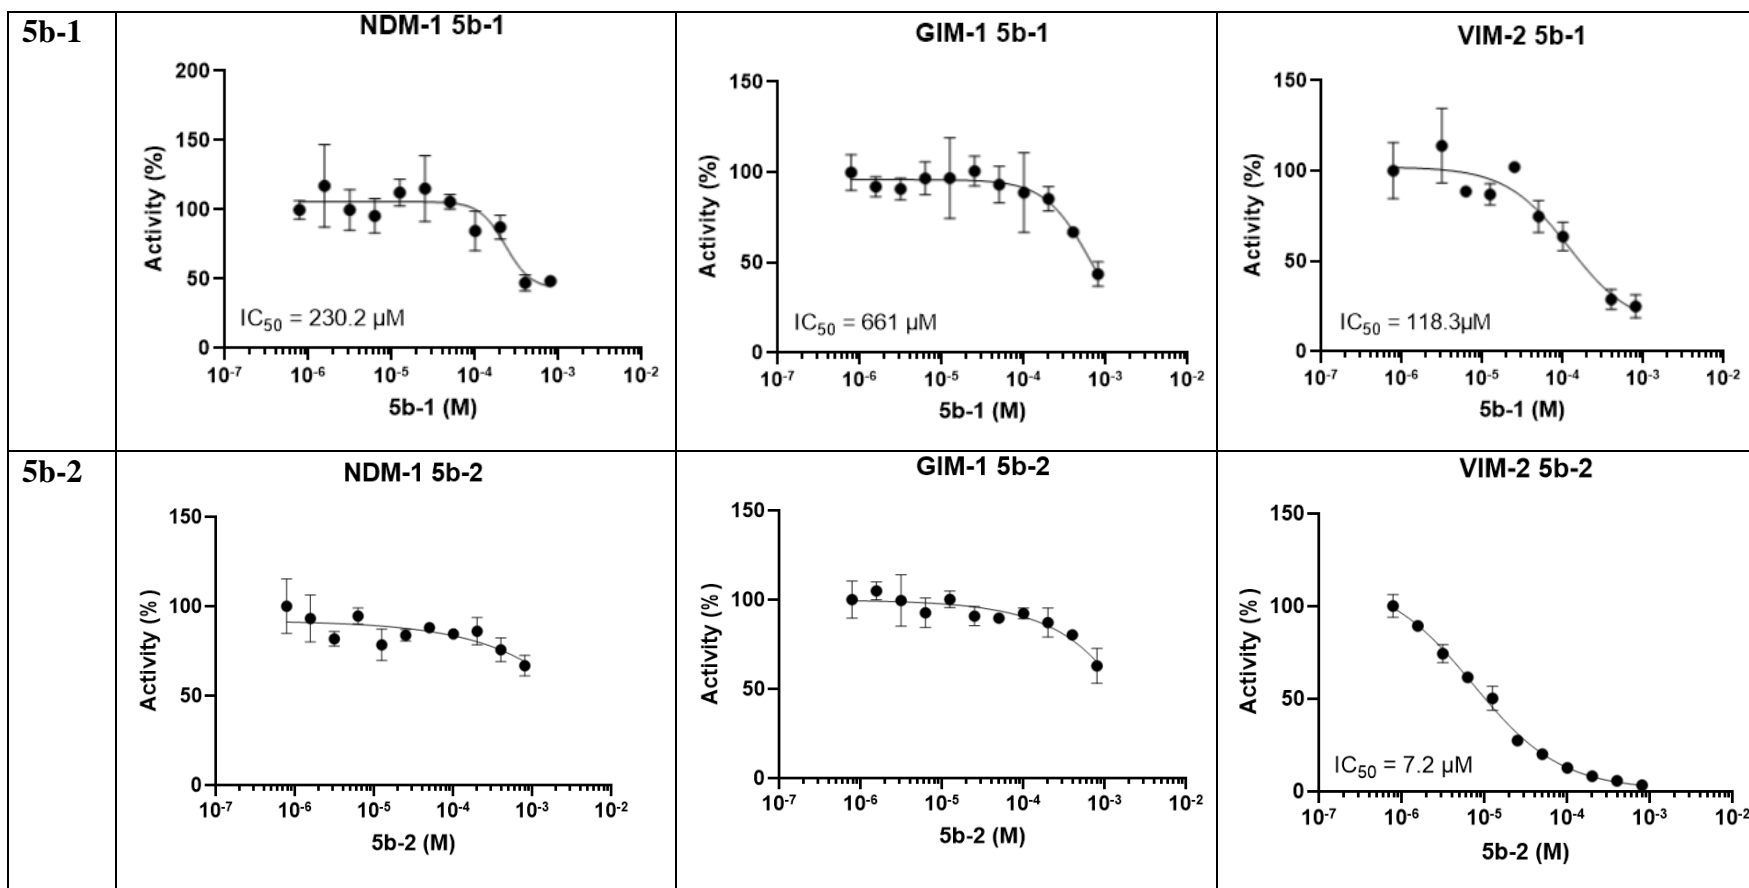

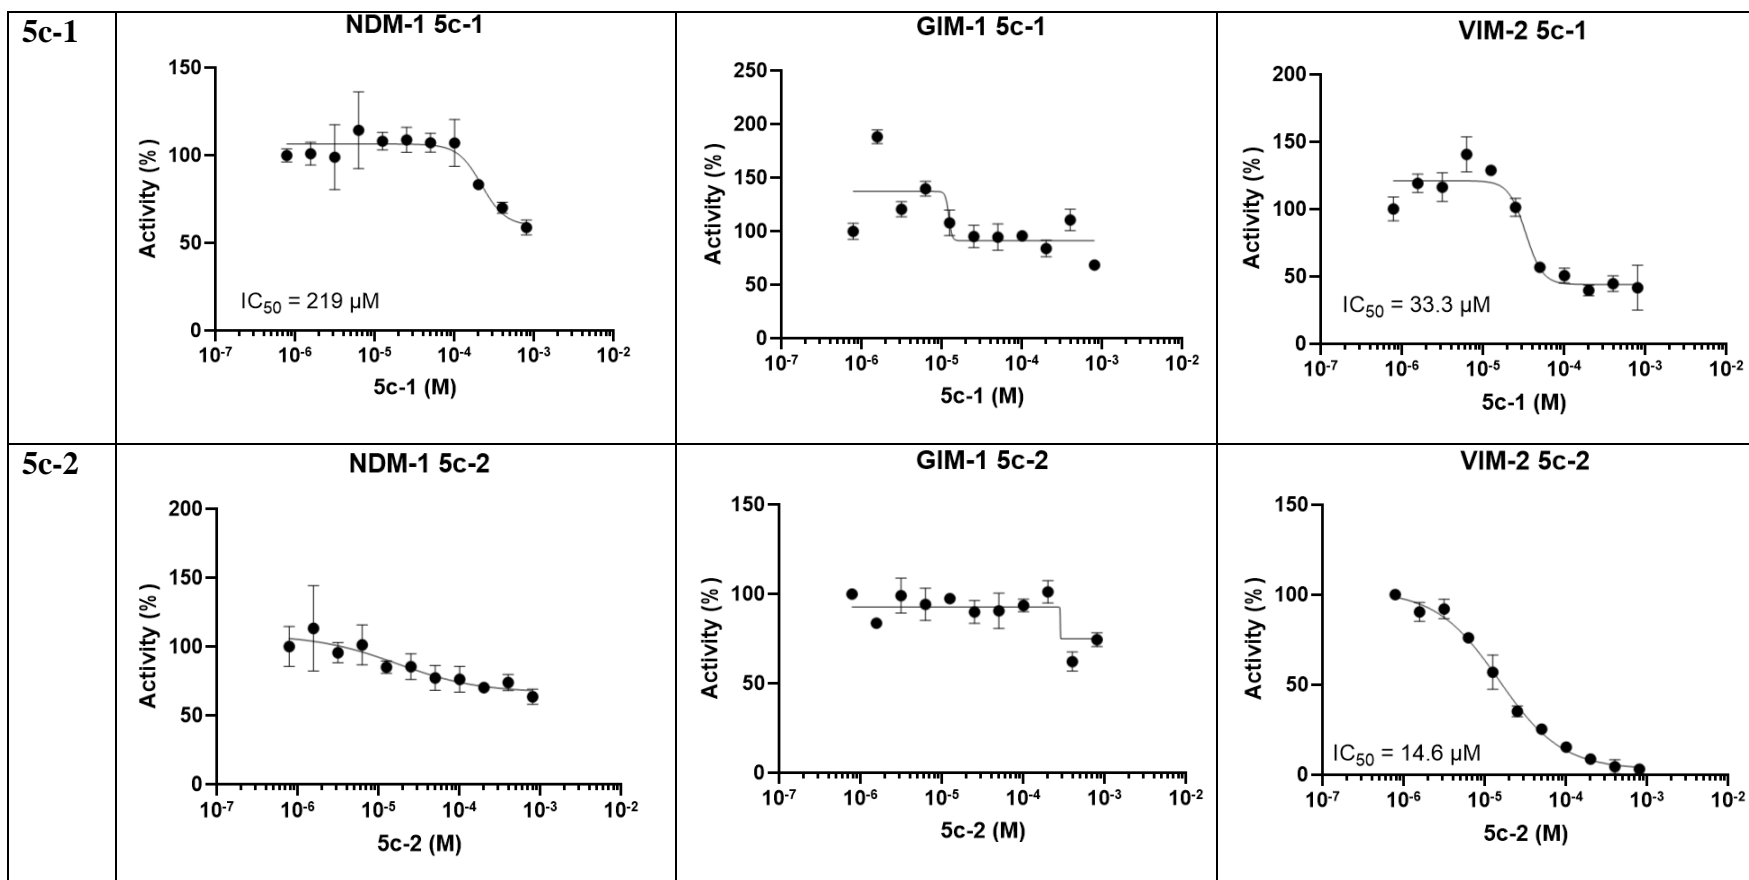



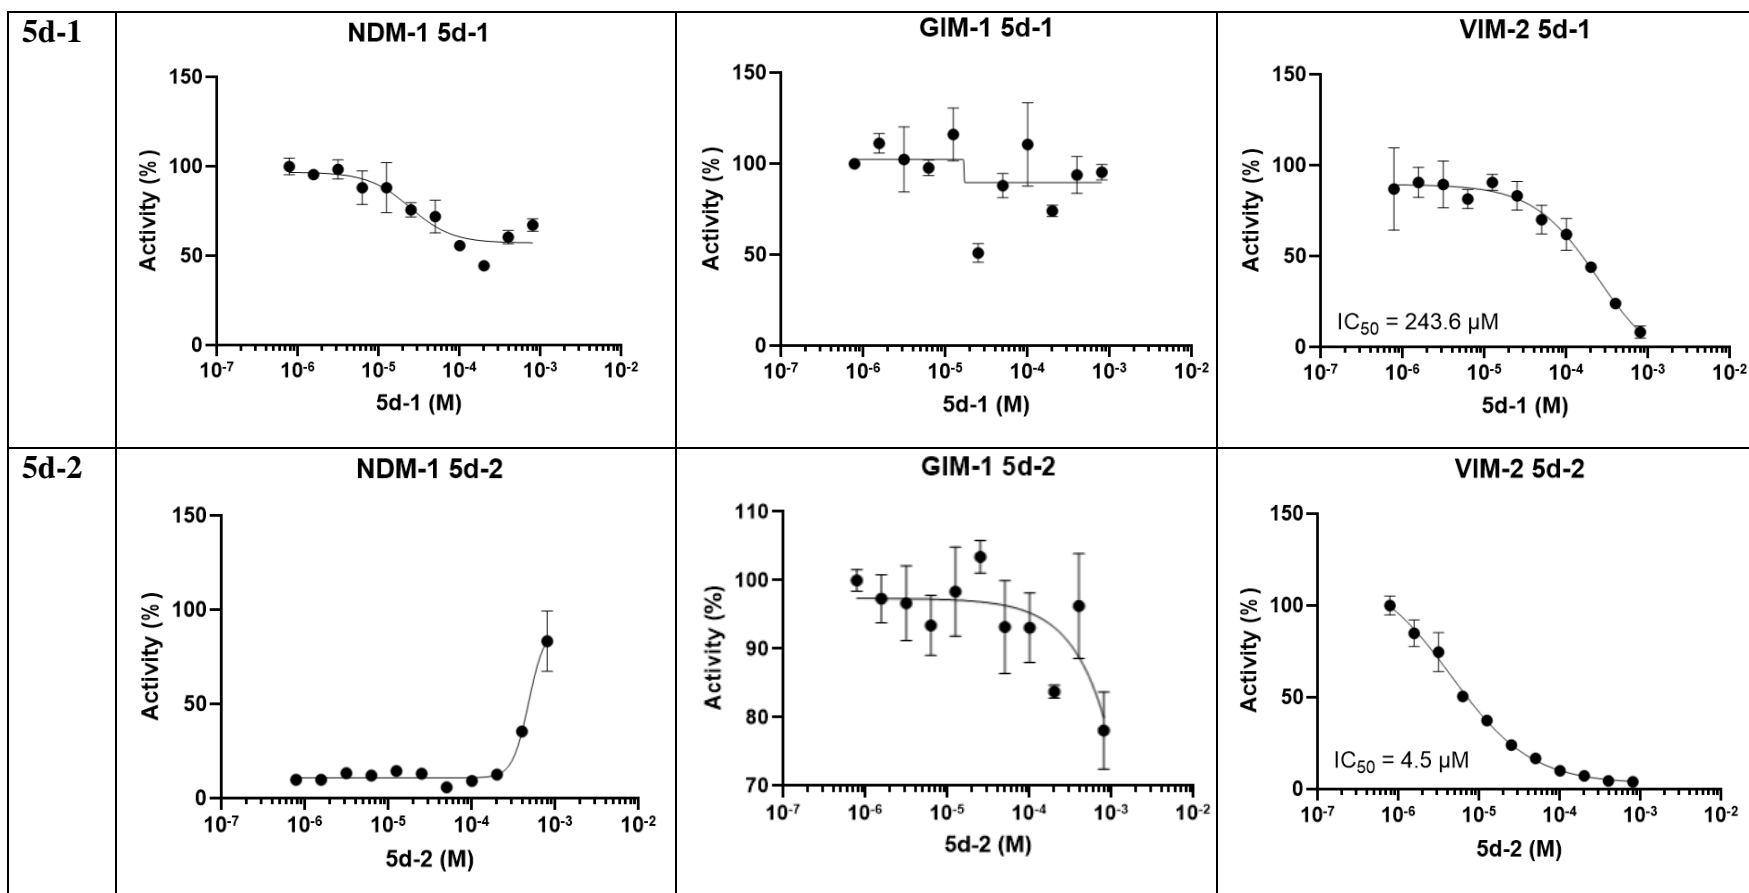

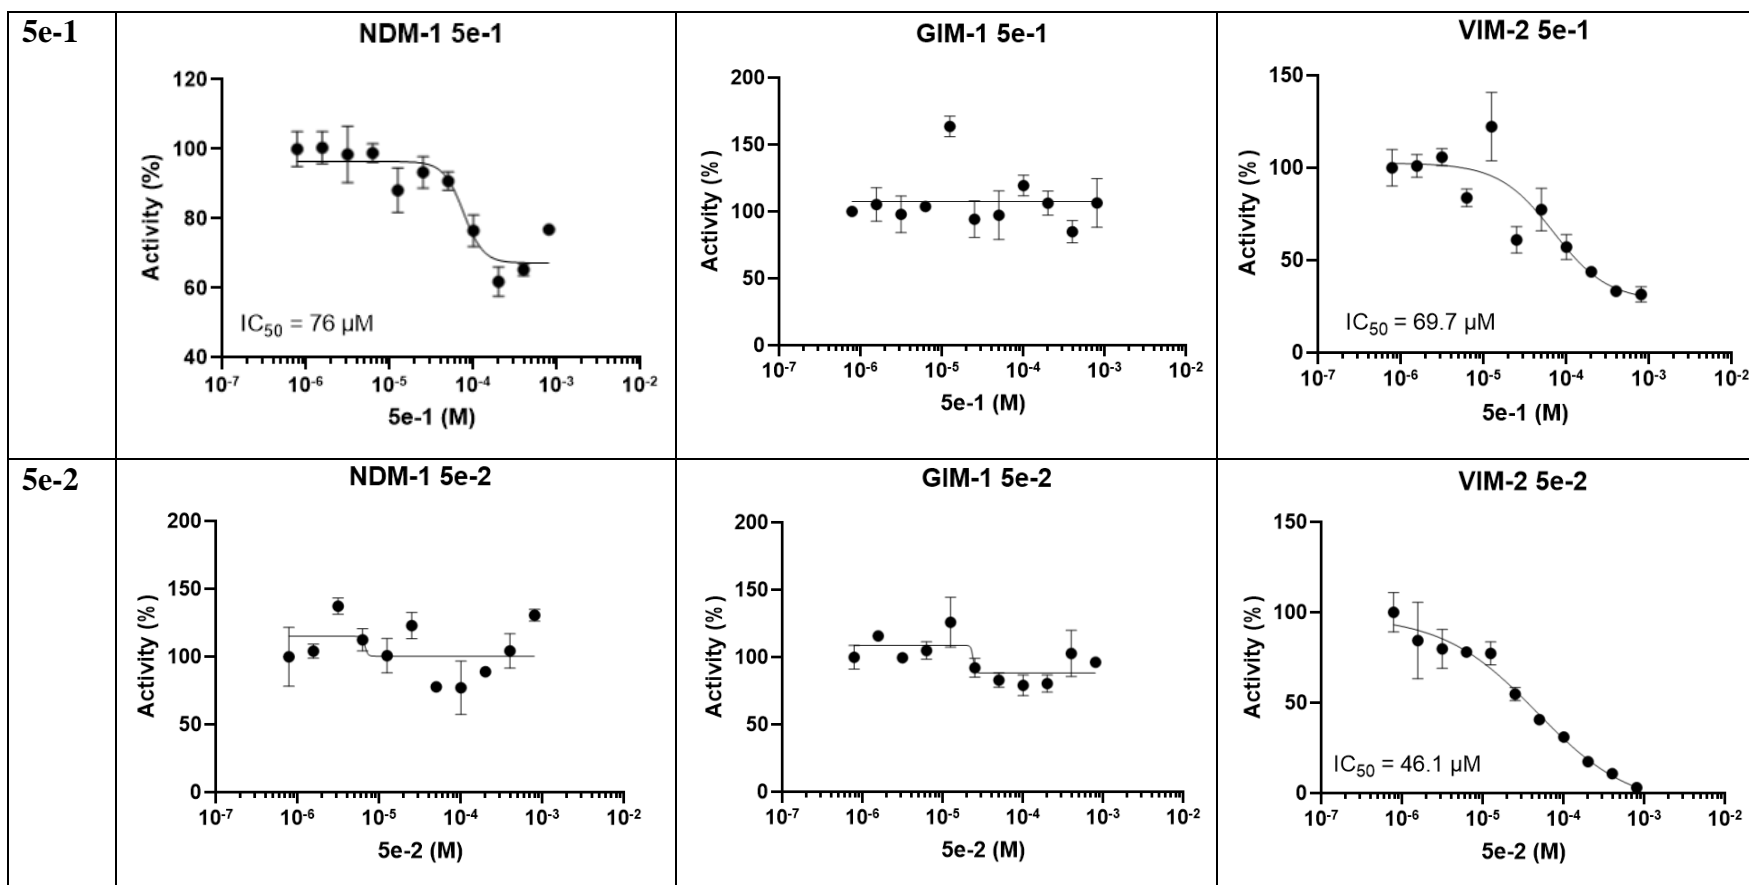

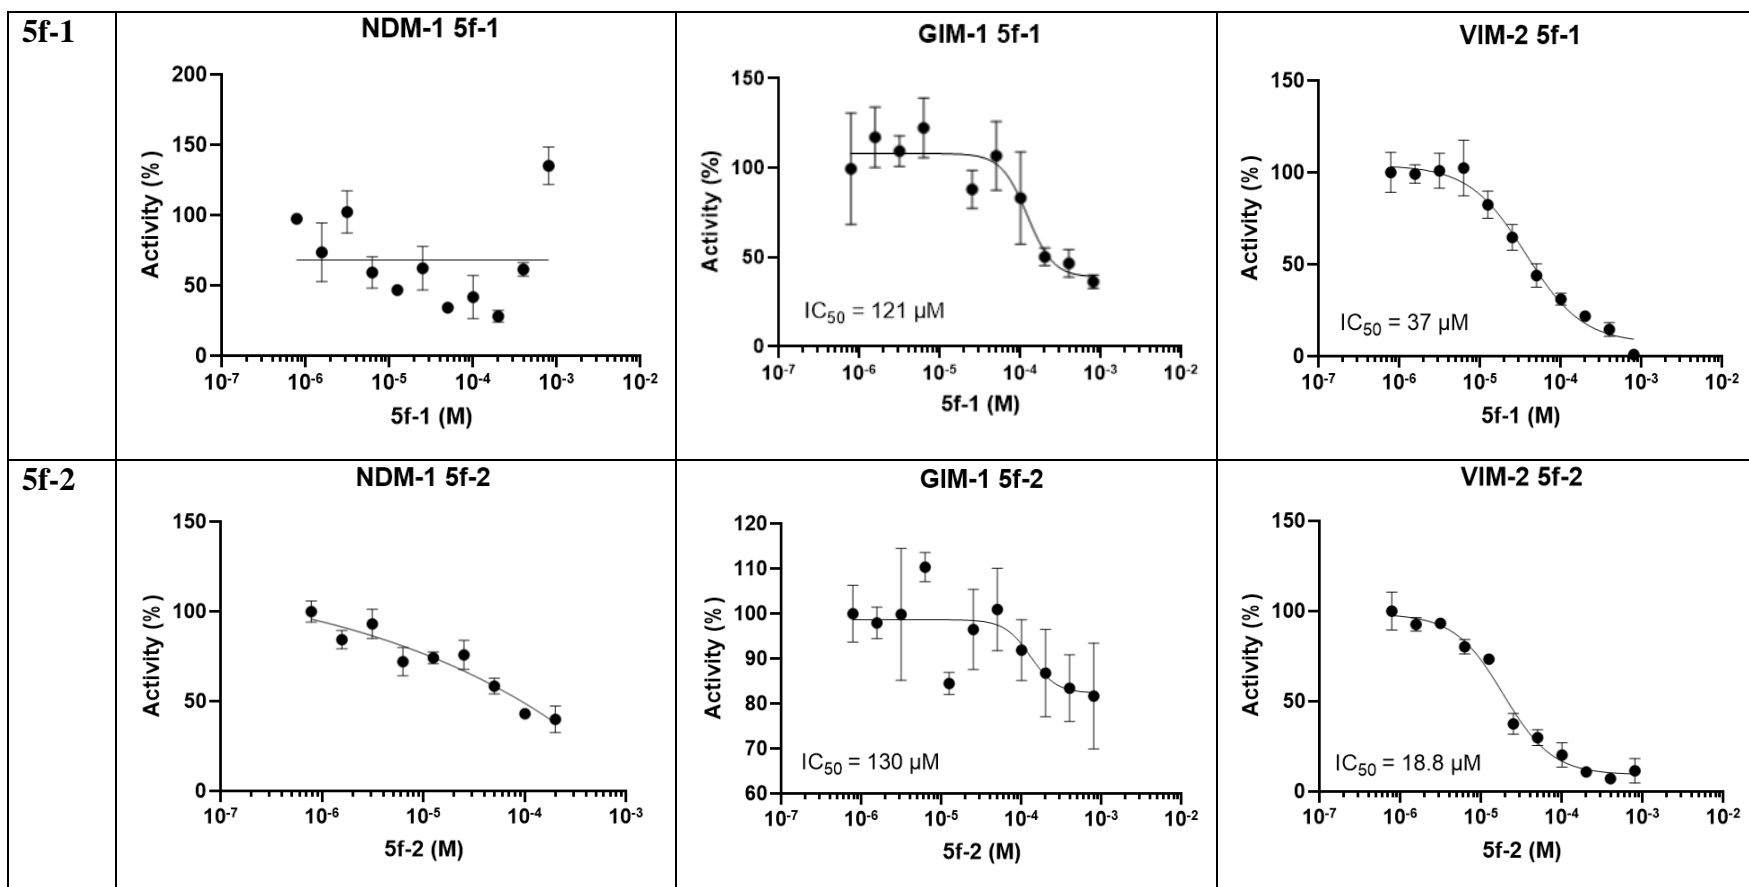

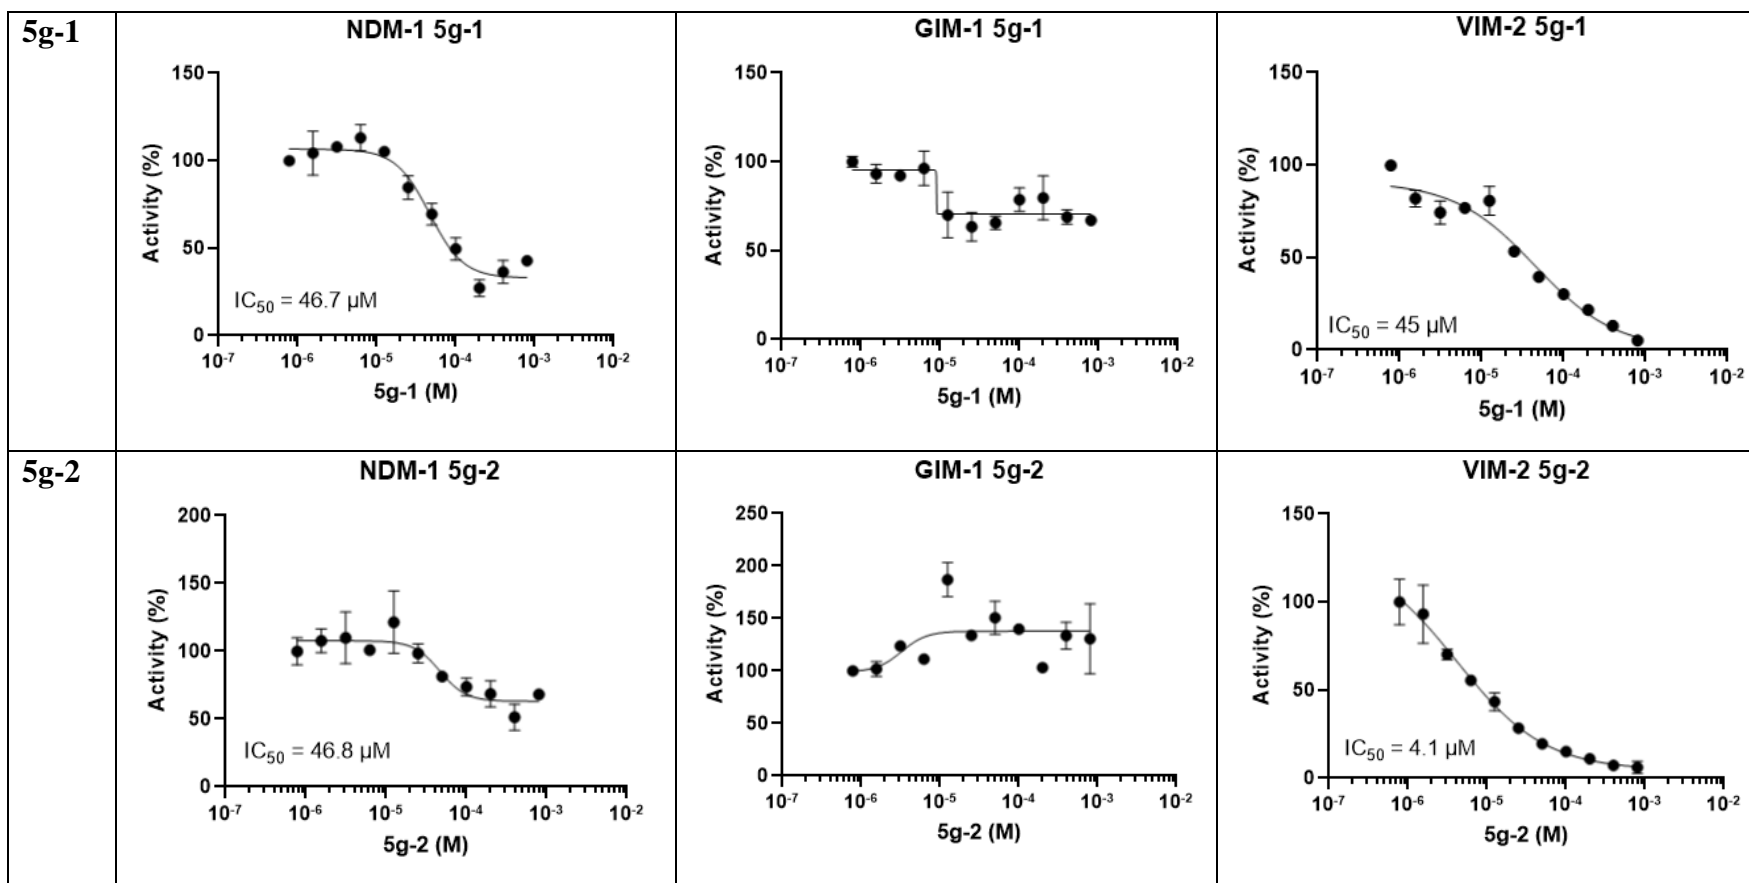

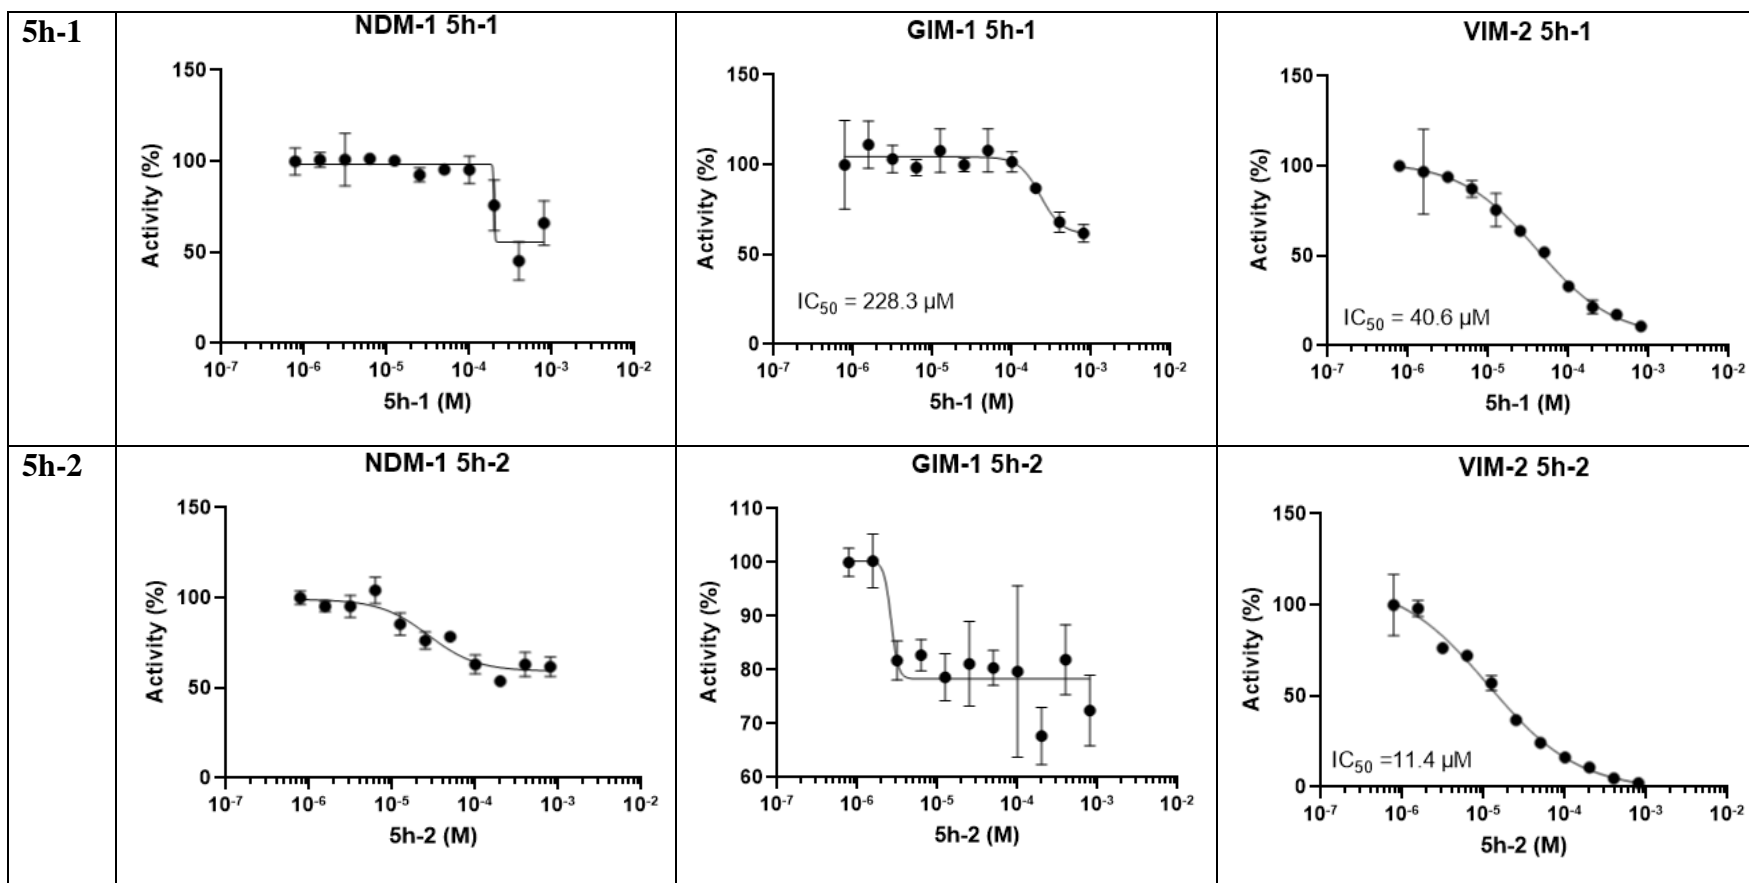

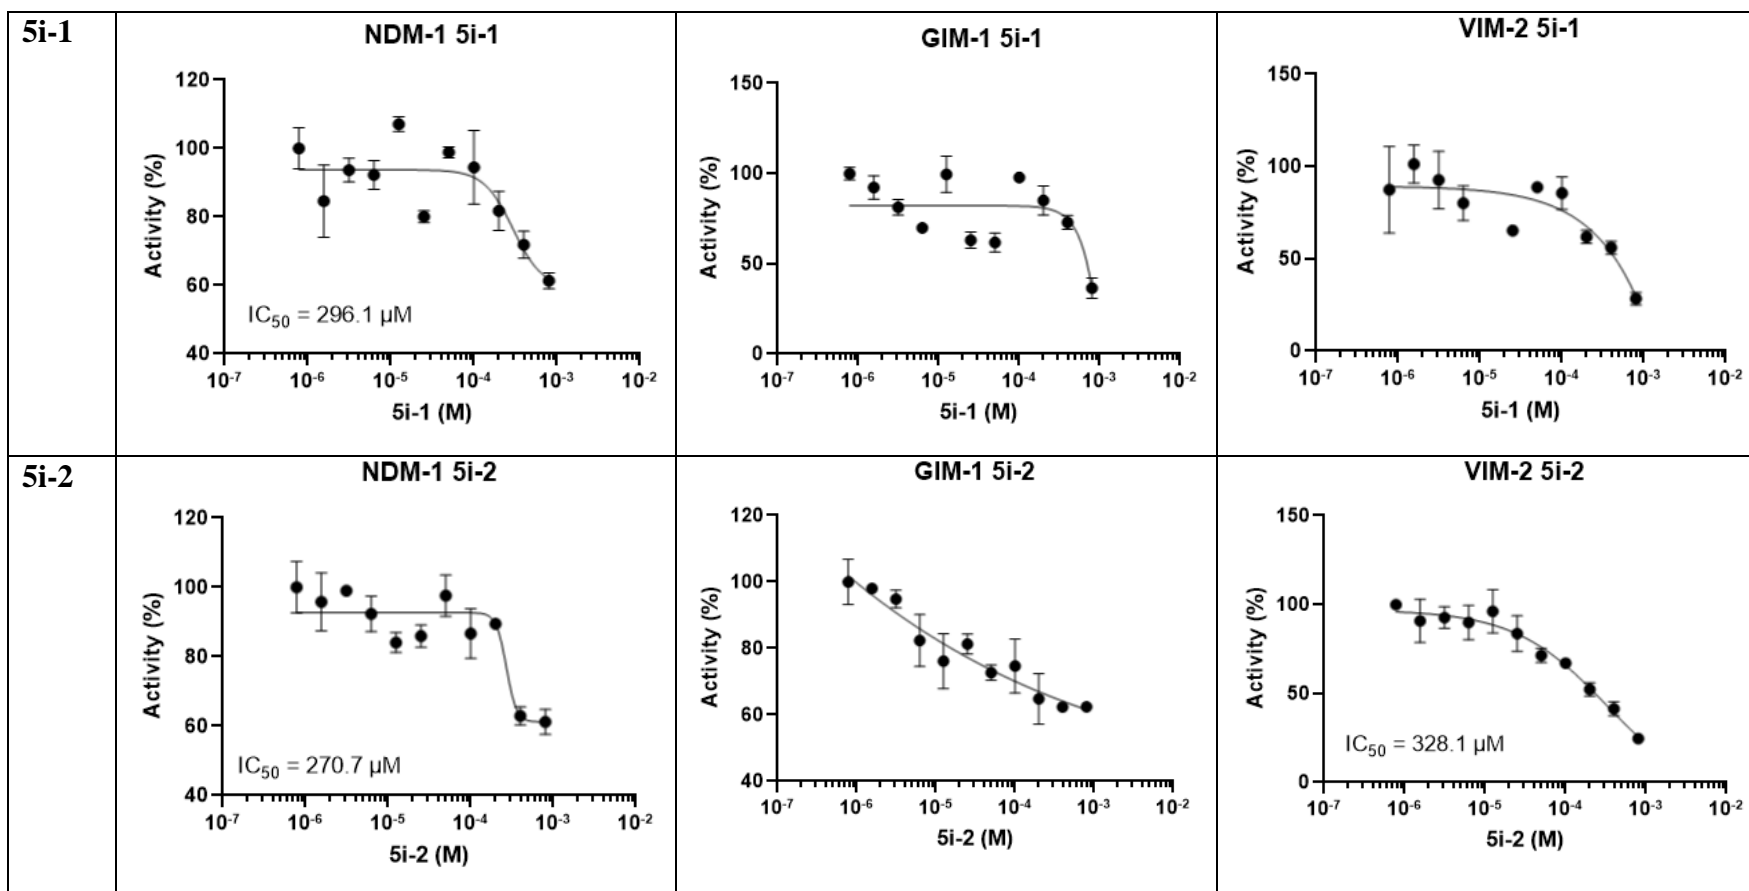

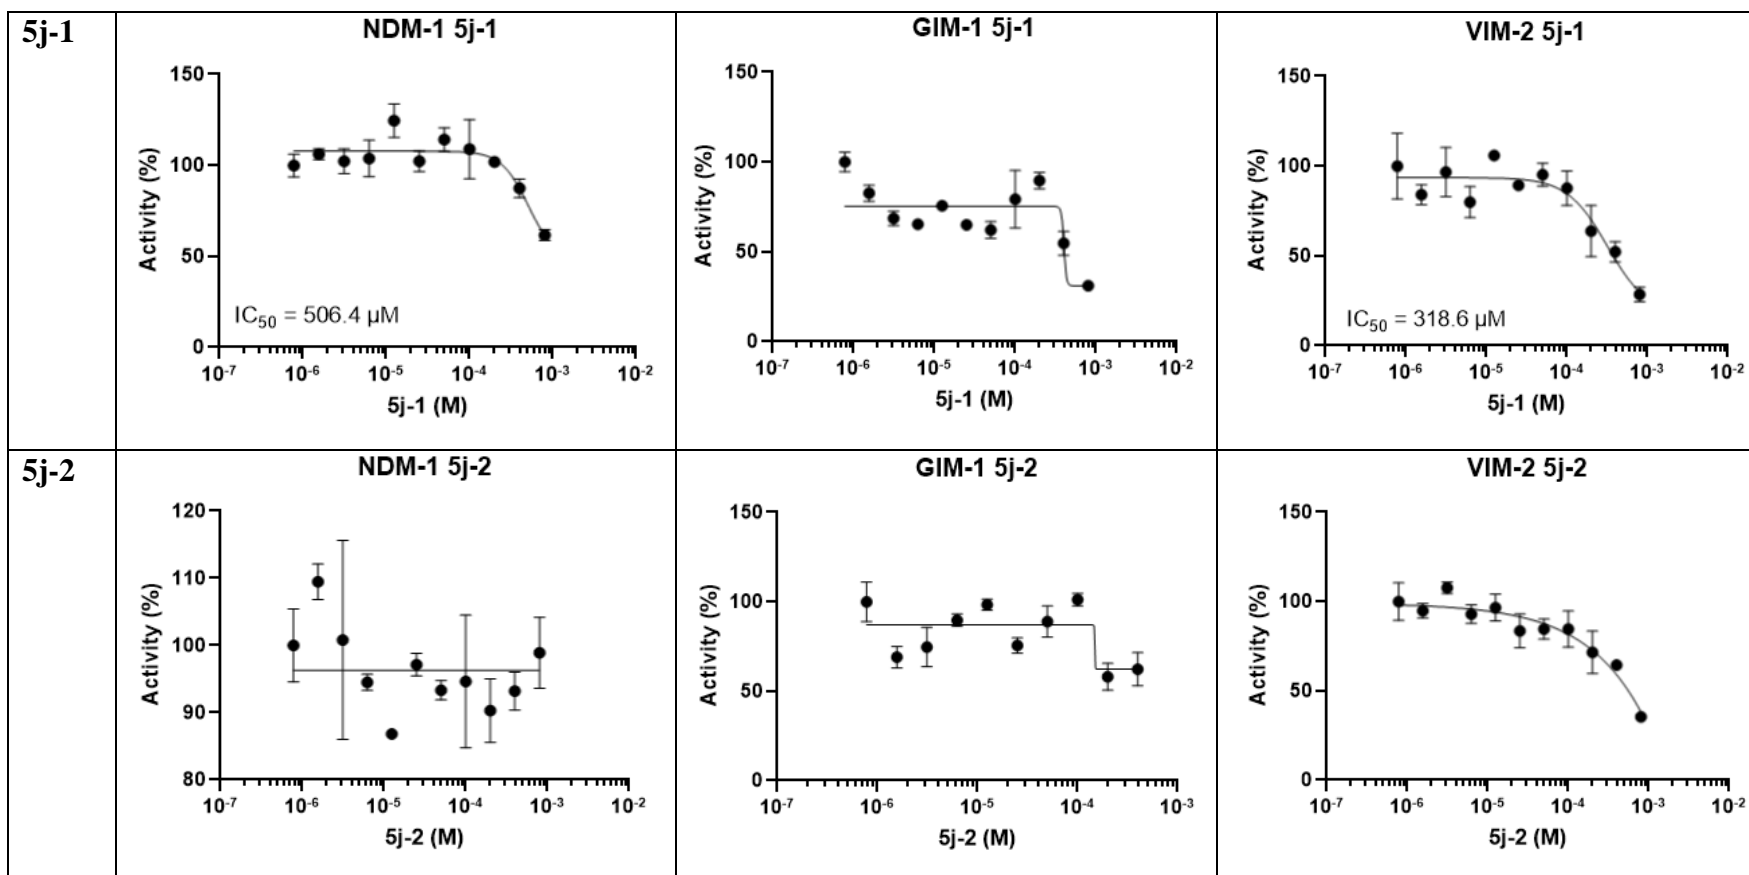

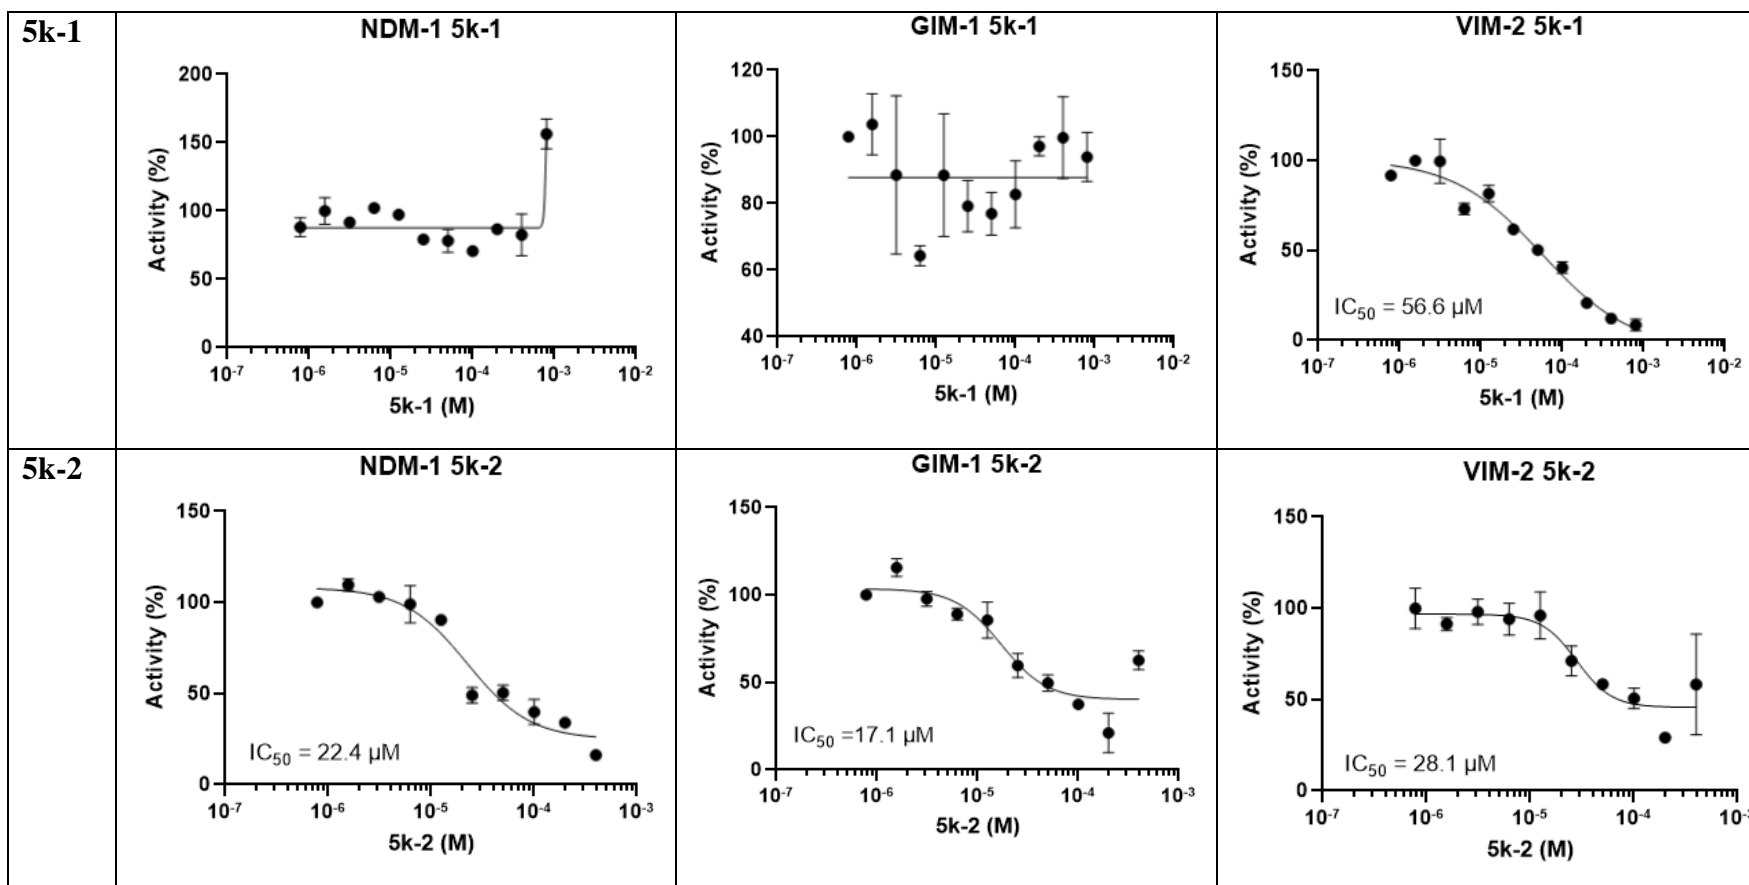



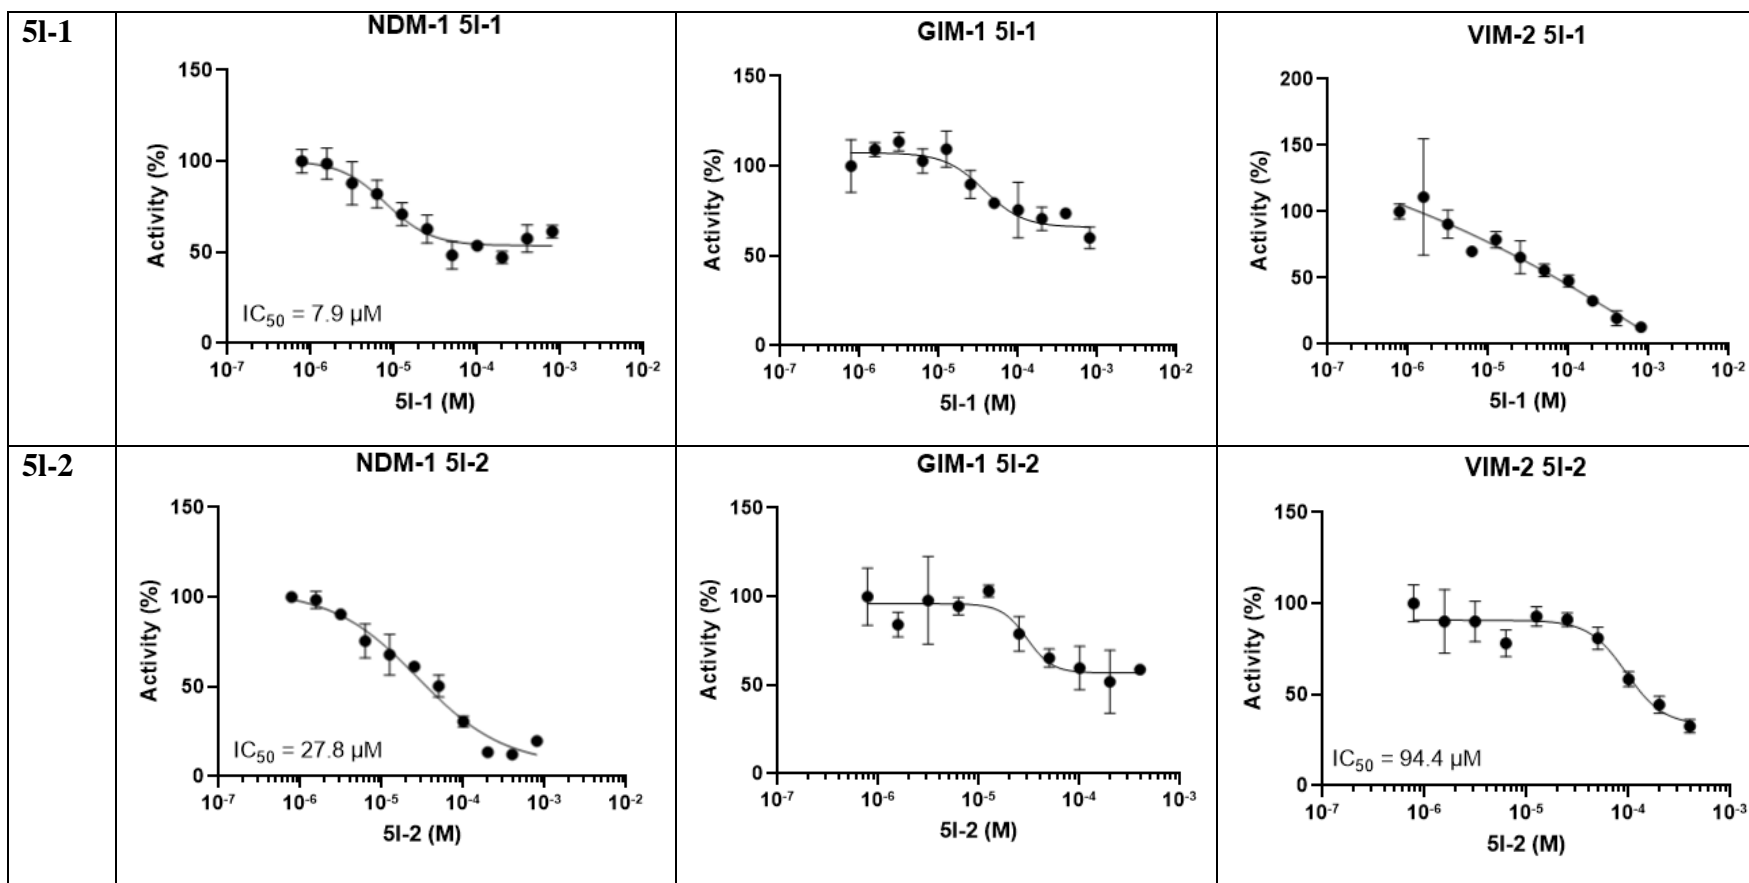

## 2. Cytotoxicity assay

**Table S2.** The dose-response graphs for the cytotoxicity testing of the inhibitors on MCF-7 cells. For details, see the experimental section in the main text. No toxicity has been observed at the tested concentrations for any of the compounds.

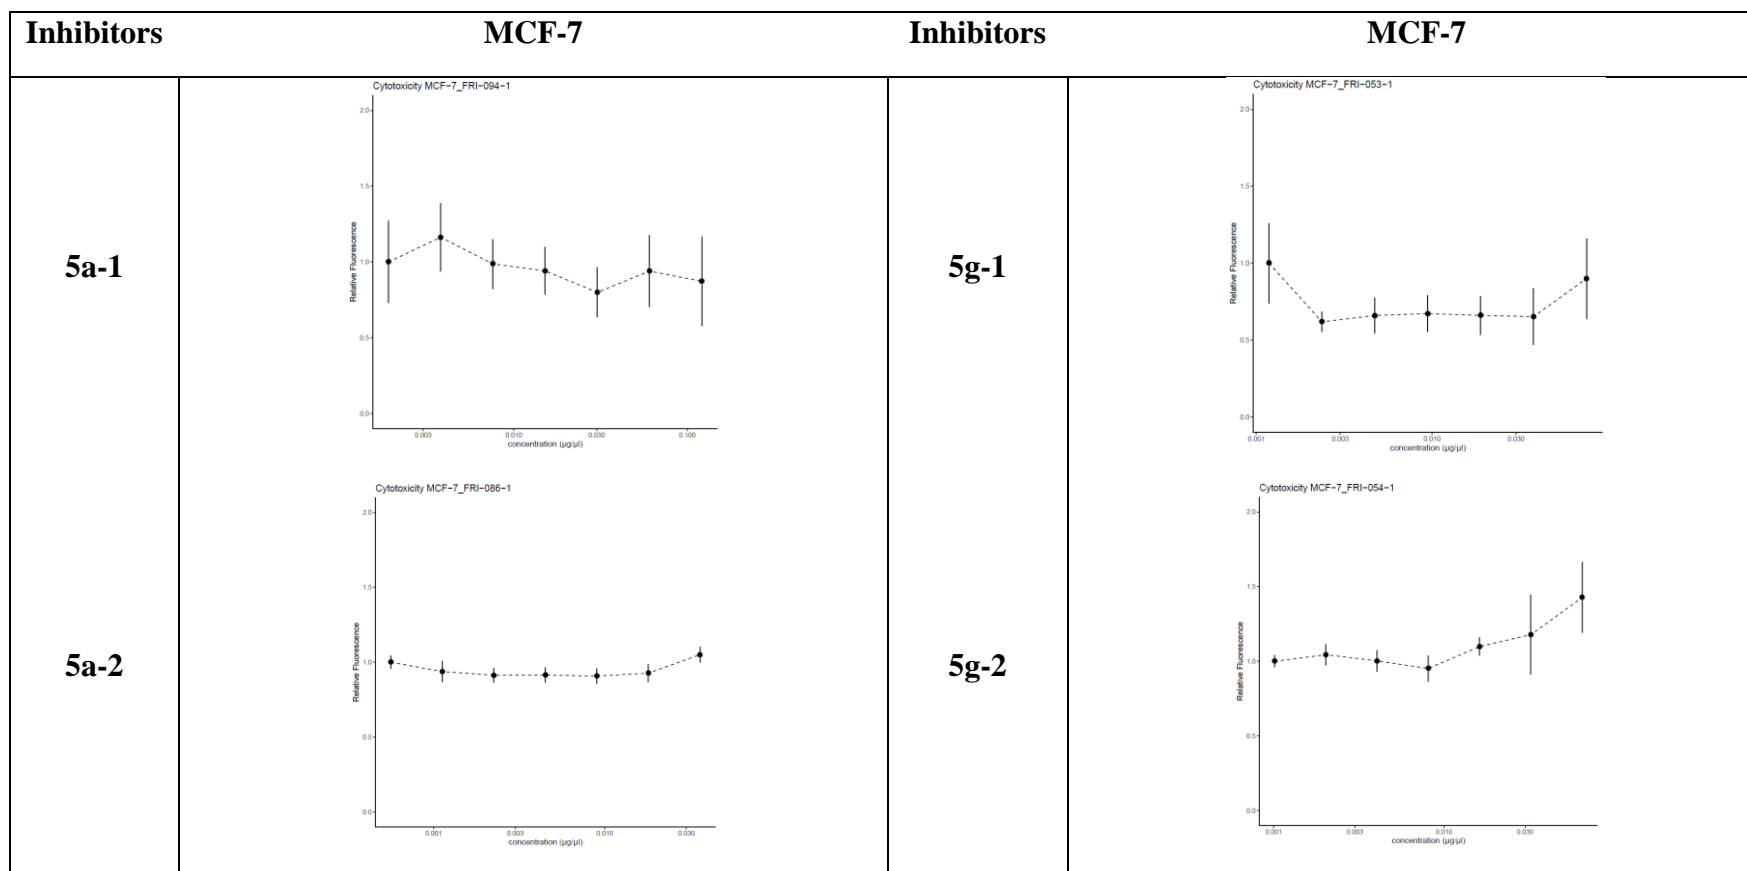

**5b-1**

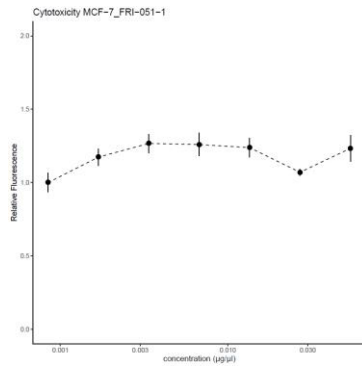

**5b-2**

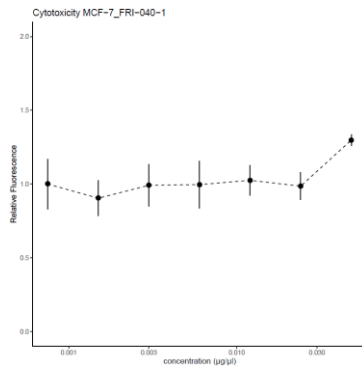

**5c-1**

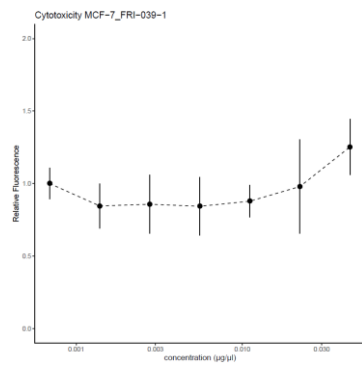

**5h-1**

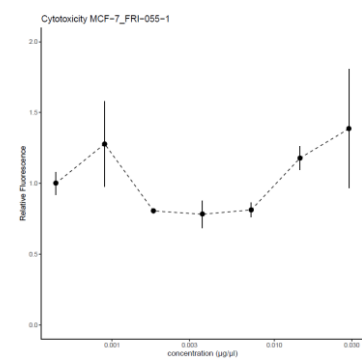

**5i-1**

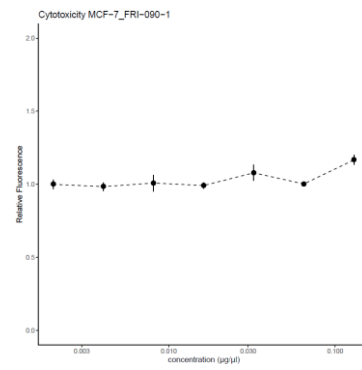

**5i-2**

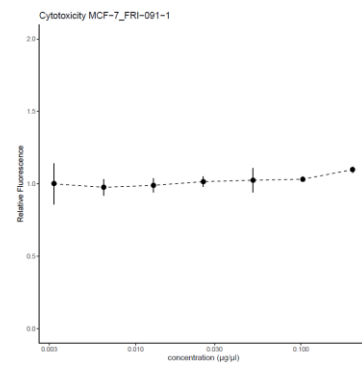

5c-2

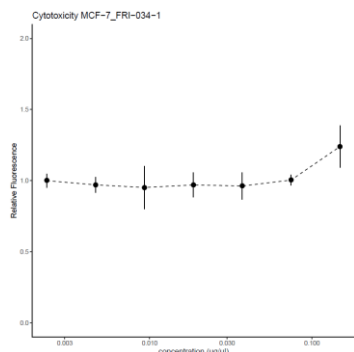

5d-1

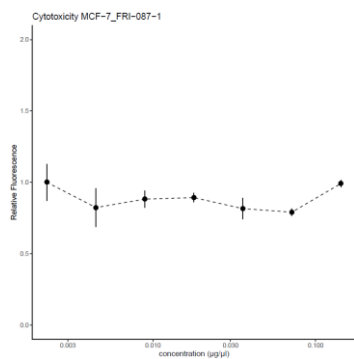

5d-2

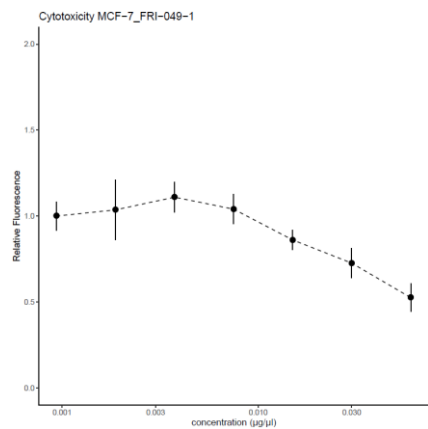

5j-1

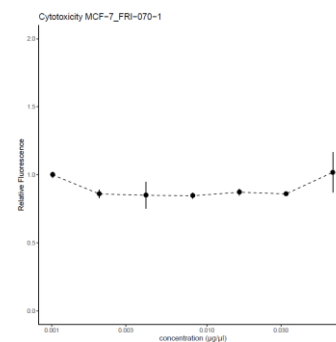

5j-2

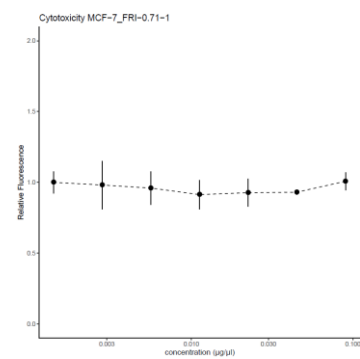

5k-1

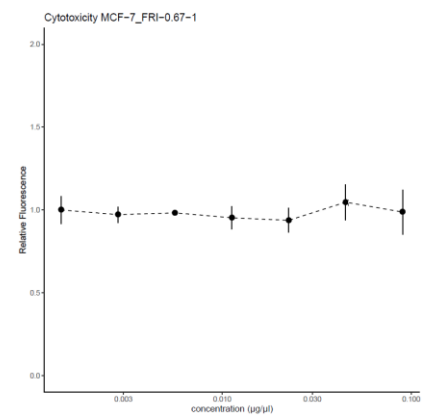

5f-1

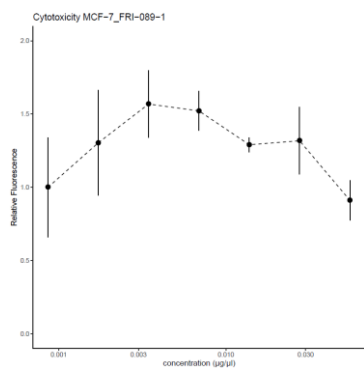

5f-2

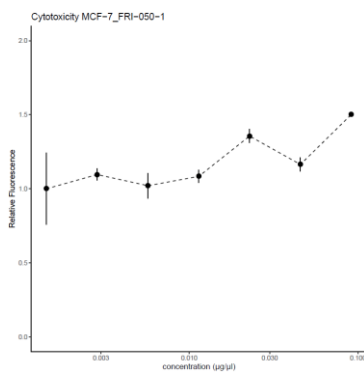

5l-1

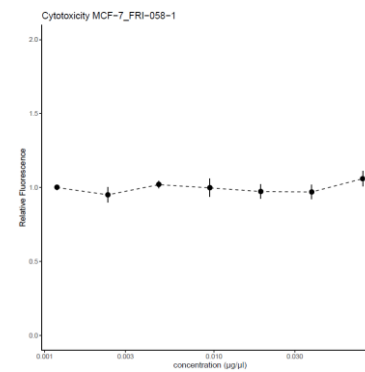

5l-2

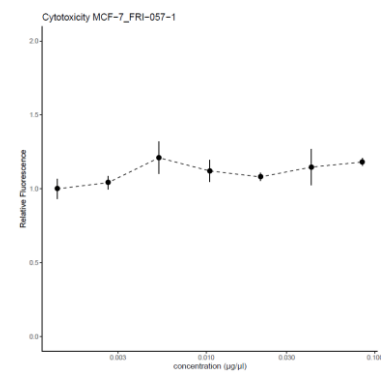

### 3. Protein sequence alignment<sup>1</sup>

The sequence of NDM-1, VIM-2 and GIM-1 aligned, to show similarities and differences.

‘.’ Semi-conservative amino acids

‘\*’ Conservative (identical) amino acids

‘:’ Conservative (similar) amino acids

CLUSTAL O(1.2.4) multiple sequence alignment

```

gi | 953357714 | gb | ALO69078.1 | GIM-1 |      -----MK---NVLVFLI---LLV-ALPA-----LAQGHKPLEVIKIEDGVYL 35
gi | 595266892 | gb | AHM26723.1 | NDM-1 |      MELPNIMHPVAKLSTALAAALMLSGCMPGEIRPTIGQQMETGDQRFGDLVFRQLAPNVWQ 60
gi | 28569602 | gb | AAO43978.1 | VIM-2 |      -----MFKLLSKLLVYLTA SIMAIASPLAFSV DSSGEYPTVSEIPVGEVRLYQIADGVWS 55
          ::  :: . *      : . .      : . :: .*:

gi | 953357714 | gb | ALO69078.1 | GIM-1 |      HTSFKNIEGYGLVDSNGLVVL DNNQAYIIDTPWSEEDTKLLLSWATD-RGYQVMASISTH 94
gi | 595266892 | gb | AHM26723.1 | NDM-1 |      HTSYLDMPGFGAVASNGLIVRDGGRVLVVDTAWTDDQTAQILNWIKQEINLPVALAVVTH 120
gi | 28569602 | gb | AAO43978.1 | VIM-2 |      HIATQSF DG-AVYPSNGLIVRDGDELLIDTAWGAKNTAALLAEIEKQIGLPVTRAVSTH 114
          * : .: * . *****: * *... : : ** * . : * : * . . * : : **

gi | 953357714 | gb | ALO69078.1 | GIM-1 |      SHEDRTAGIKLLNSKSIPTYTSELTKLLAREGKPVPTHYFKD-----DEFTLGNGLI 147
gi | 595266892 | gb | AHM26723.1 | NDM-1 |      AHQDKMGGMDALHAAGIATYANALSNQLAPQEGMVAAQHSLTFAANGWVEPATAPNFGPL 180
gi | 28569602 | gb | AAO43978.1 | VIM-2 |      FHDDRVGVDVLR AAGVATYASPSTRRLAEVEGNEIPTHSL----EGLSSSGDAVRF GPV 170
          * : * . * : . : * : . : : * ** * : : * :

gi | 953357714 | gb | ALO69078.1 | GIM-1 |      ELYYPGAGHTEDNIVAWLPKSKILFGGCLVRSHEWEG LGYVGDASISSWADSIKNIVSKK 207
gi | 595266892 | gb | AHM26723.1 | NDM-1 |      KVFYPPGPGHTSDNITV GIDGTDIAFGGCLIKDSKAKSLGNLGDADTEHYAASARAFGA AF 240
gi | 28569602 | gb | AAO43978.1 | VIM-2 |      ELFYPGA AHSTDNLVVYVPSASVLYGGCAIYELSR TSAGNVADADLAEWPTSIERIQQHY 230
          : : : ** * : * : : : : : : : : : : : : : : : : : : : : : : : : :

gi | 953357714 | gb | ALO69078.1 | GIM-1 |      YPIQM VVPGHGKVGSSDILDHTIDLAESASNKLMQPTAEASAD 250
gi | 595266892 | gb | AHM26723.1 | NDM-1 |      PKASMI VMSHSAPDSRAAITHTARMADKLR----- 270
gi | 28569602 | gb | AAO43978.1 | VIM-2 |      PEAQFVI PGHGLPGGLDLLKHTTNNVKAHTNRSVVE----- 266

```

Identical positions: 45, similar positions: 47

#### 4. NMR spectra of the synthesized compounds

*Tert*-butyl 2-((benzylamino)(diethoxyphosphoryl)methyl)piperidine-1-carboxylate (**2**)

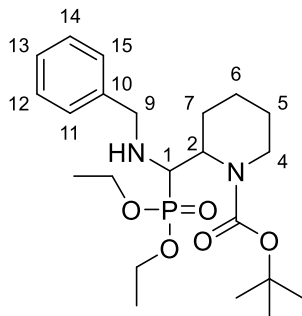

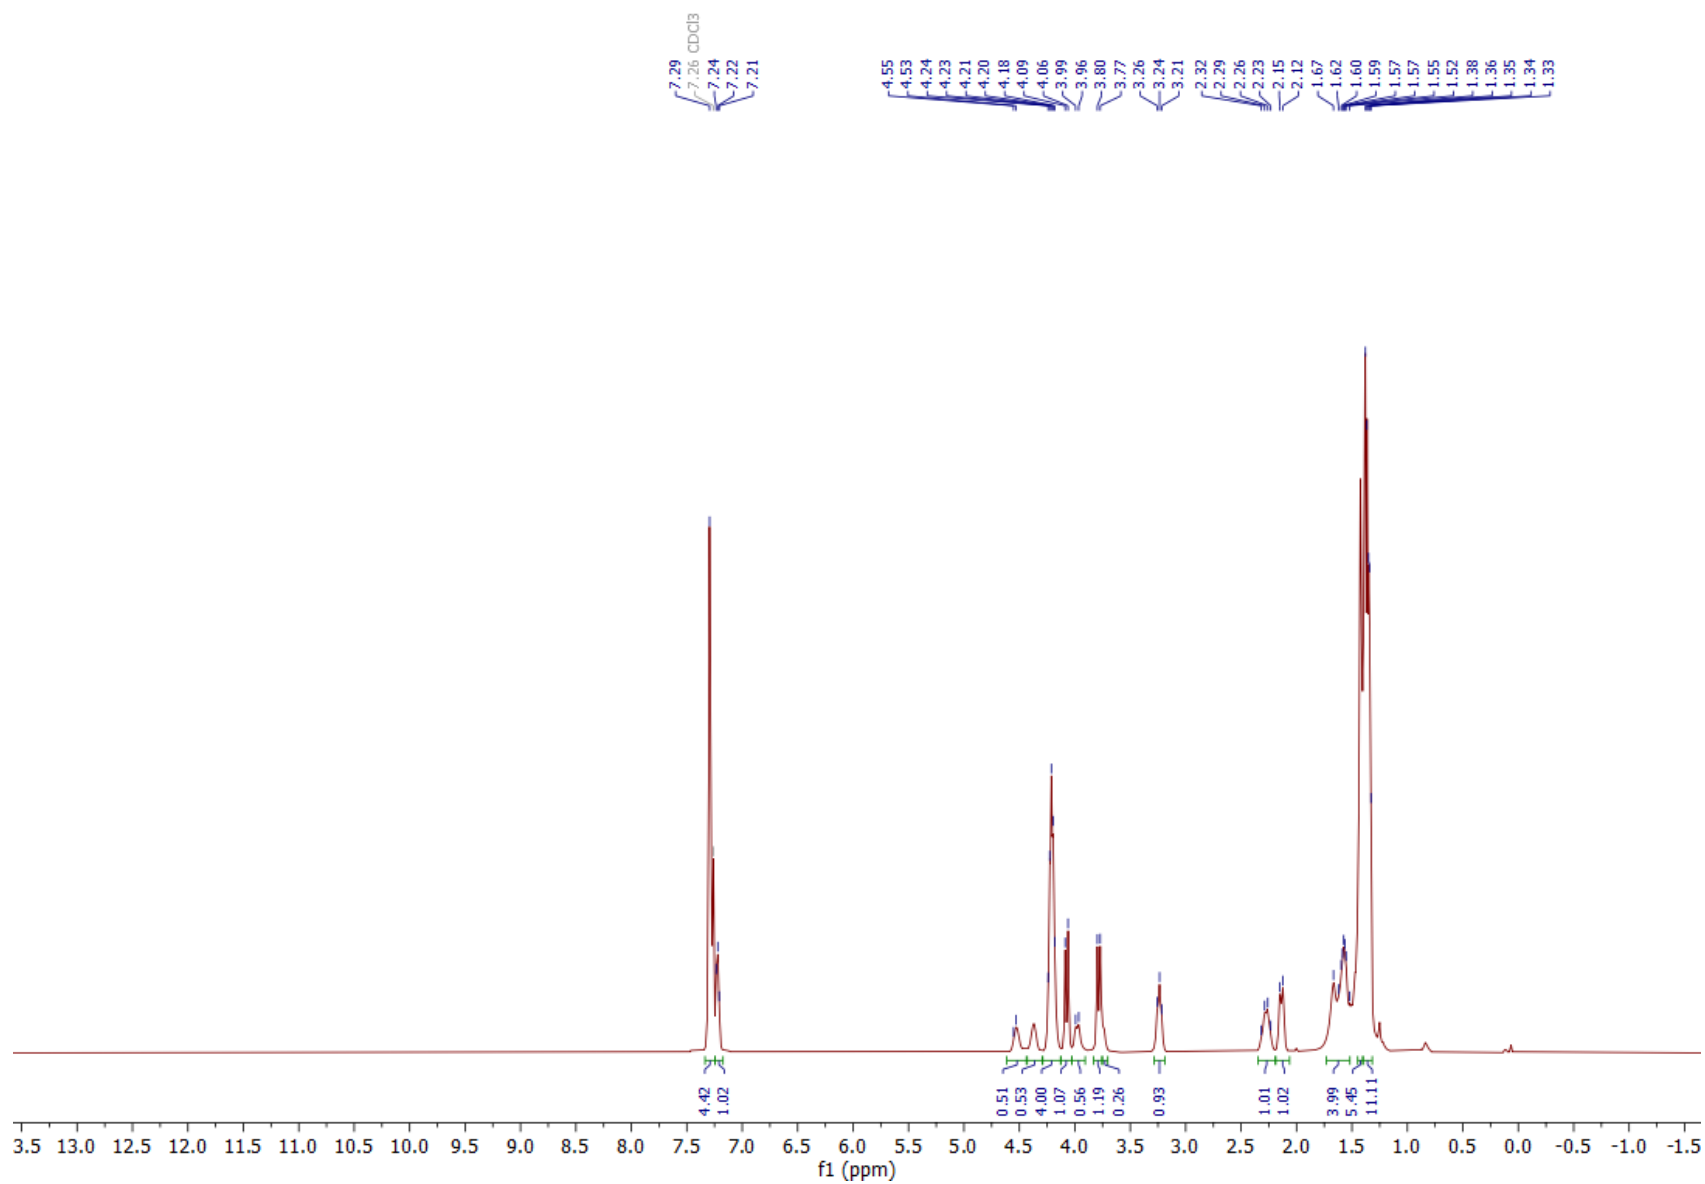

**Figure S1.** <sup>1</sup>H NMR spectrum of **2** diastereomer 1.



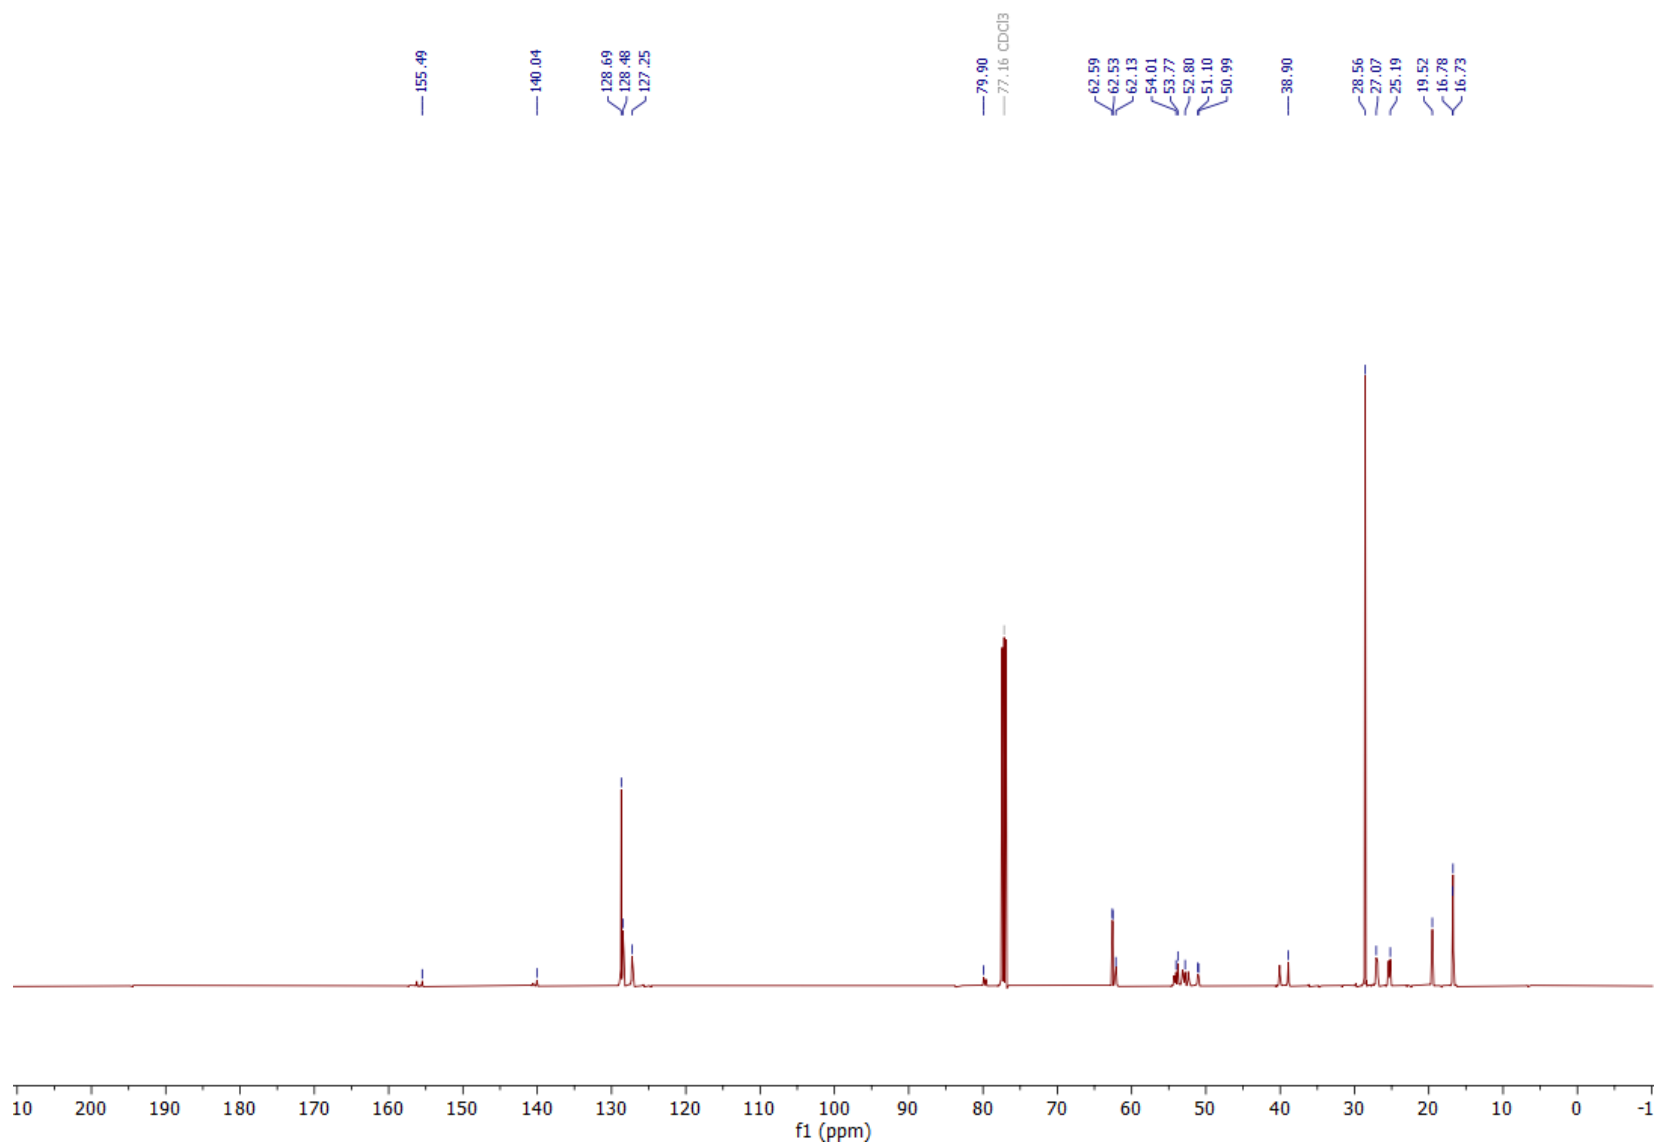

**Figure S2.** <sup>13</sup>C NMR spectrum of 2 diastereomer 1.

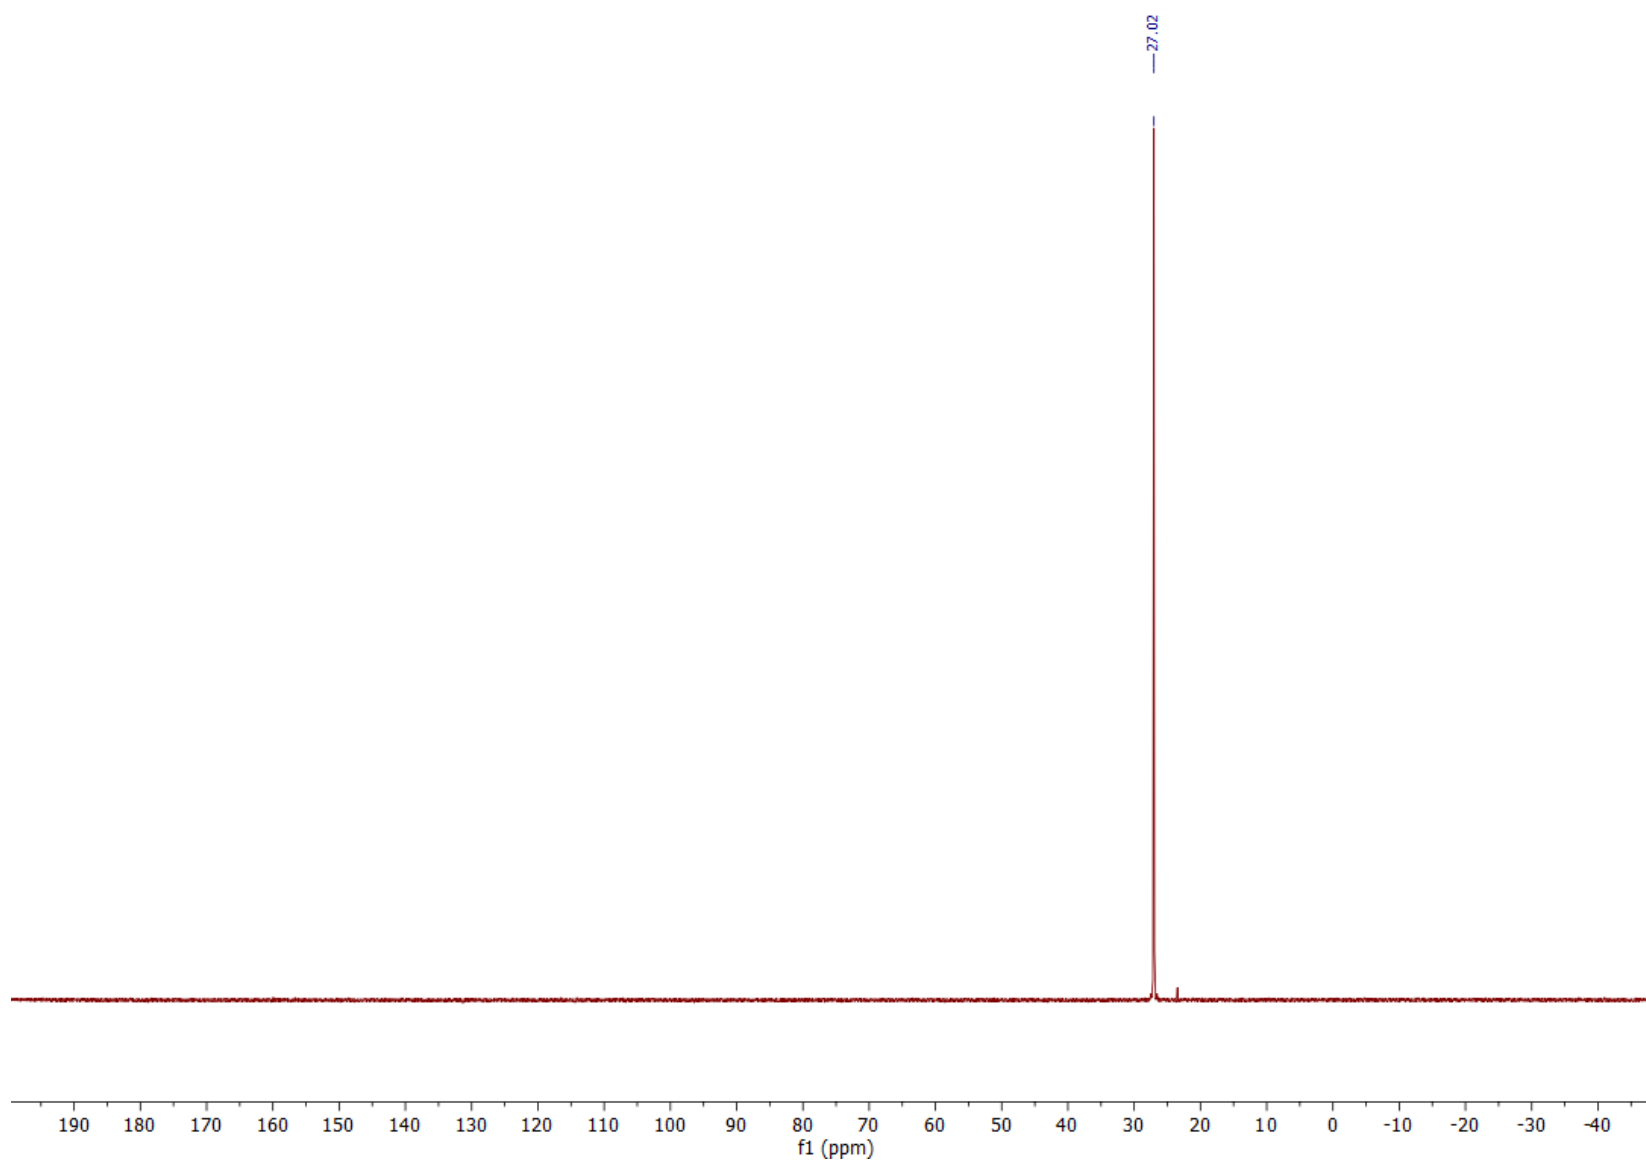

**Figure S3.**  $^{31}\text{P}$  NMR spectrum of **2** diastereomer **1**.

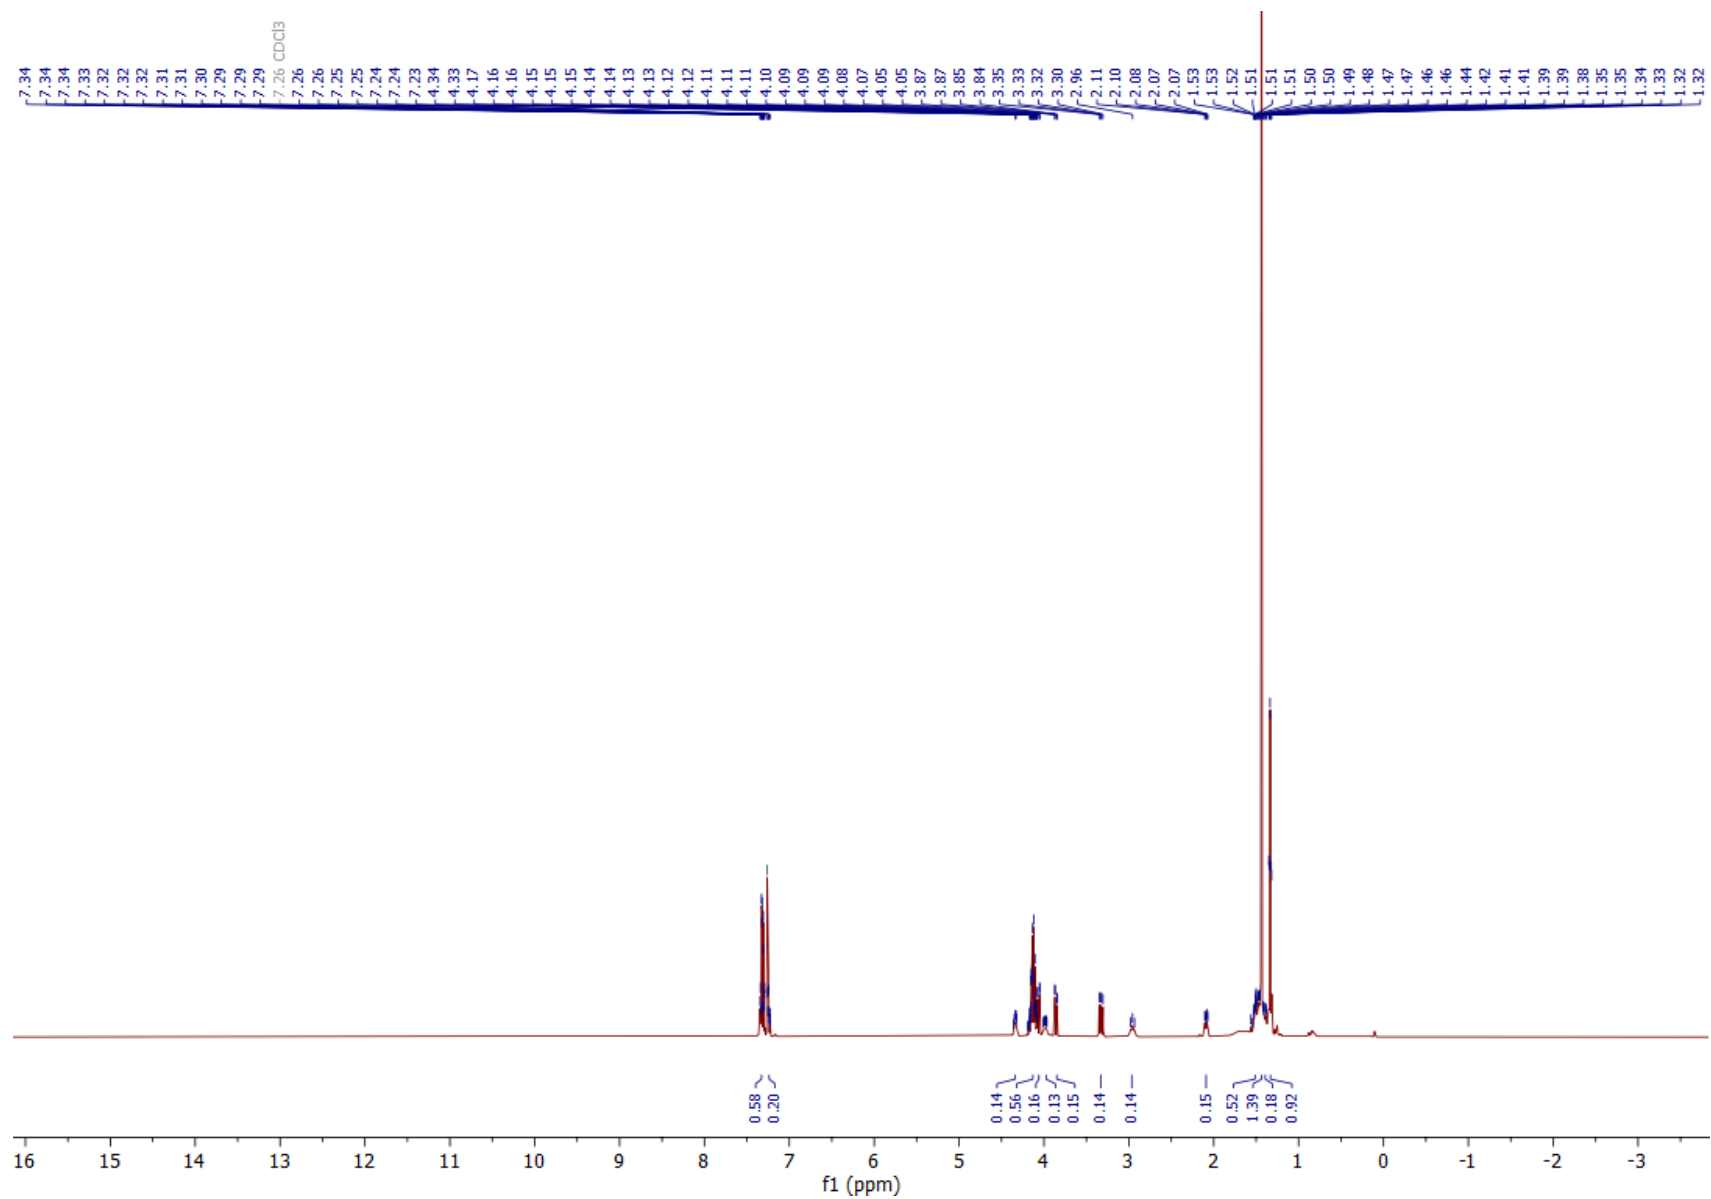

**Figure S4.**  $^1\text{H}$  NMR spectrum of **2** diastereomer 2.

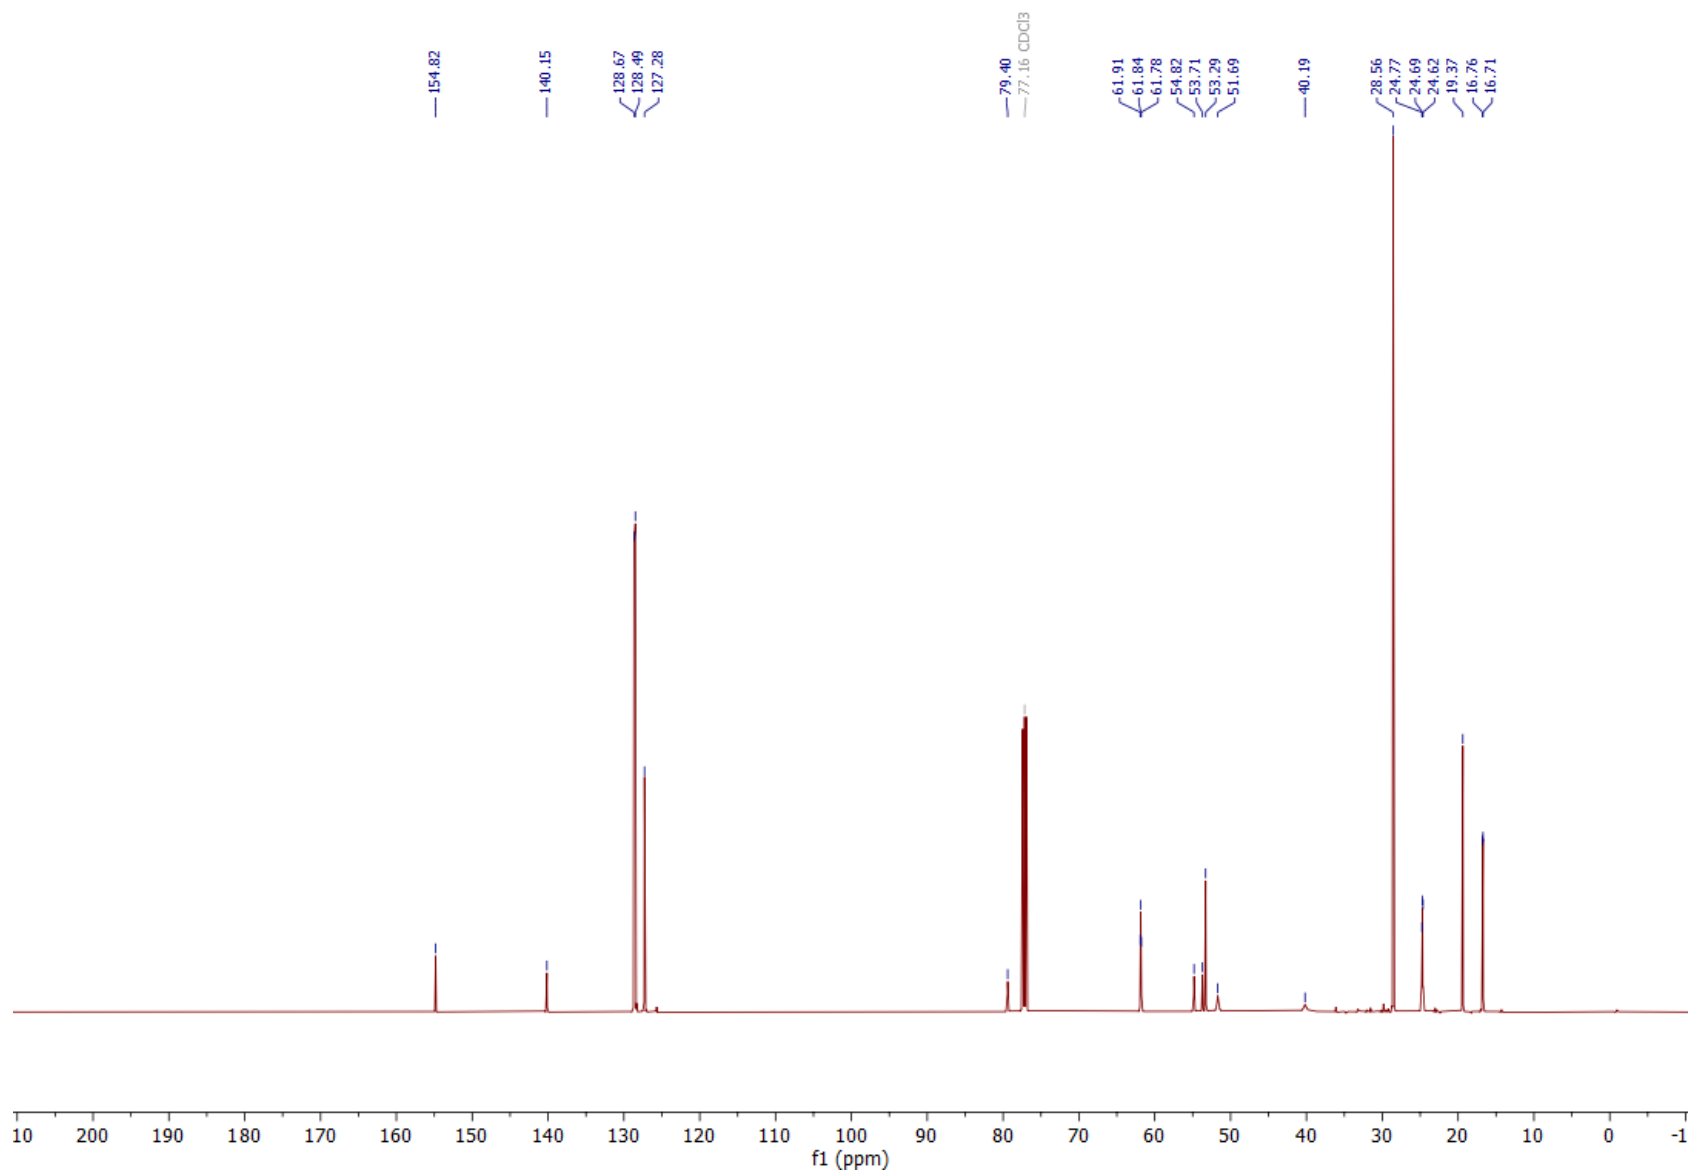

**Figure S5.** <sup>13</sup>C NMR spectrum of **2** diastereomer 2.

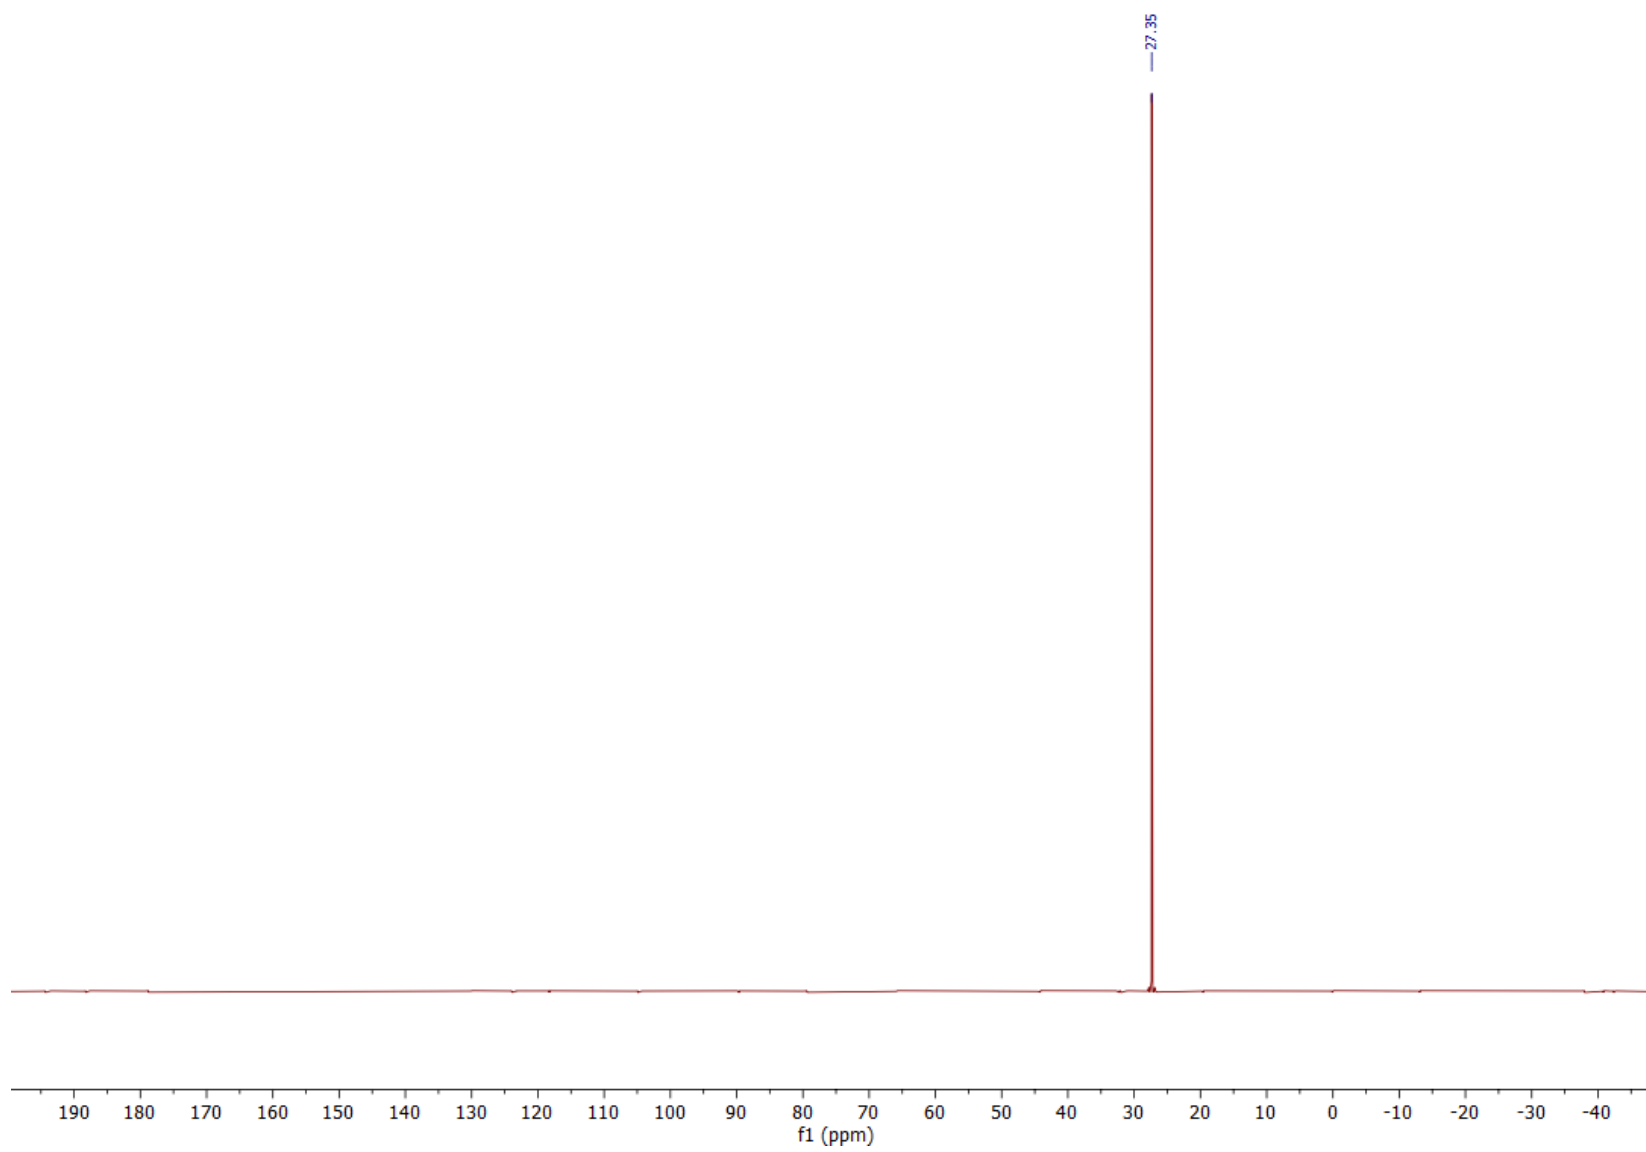

**Figure S6.**  $^{31}\text{P}$  NMR spectrum of **2** diastereomer **2**.

*Tert*-butyl 2-(amino(diethoxyphosphoryl)methyl)piperidine-1-carboxylate (**3**)

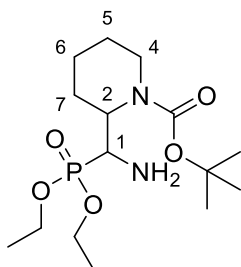

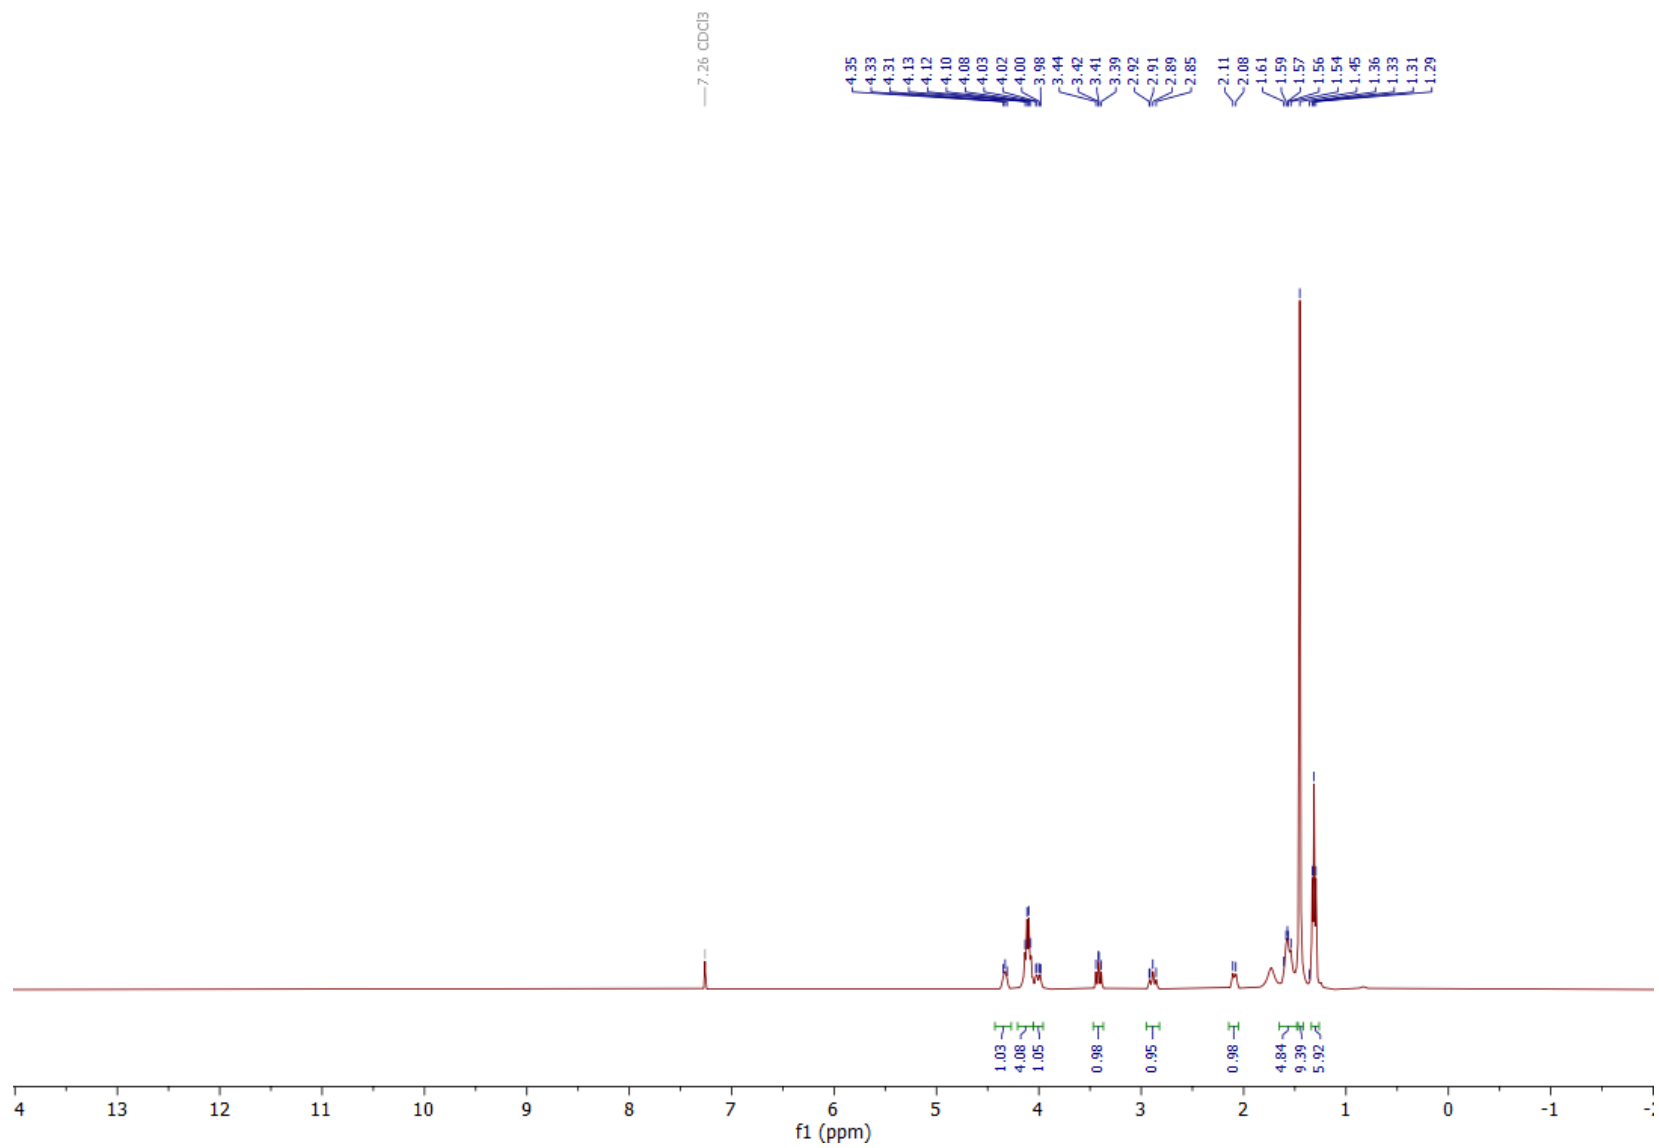

**Figure S7.** <sup>1</sup>H NMR spectrum of **3** diastereomer 1.

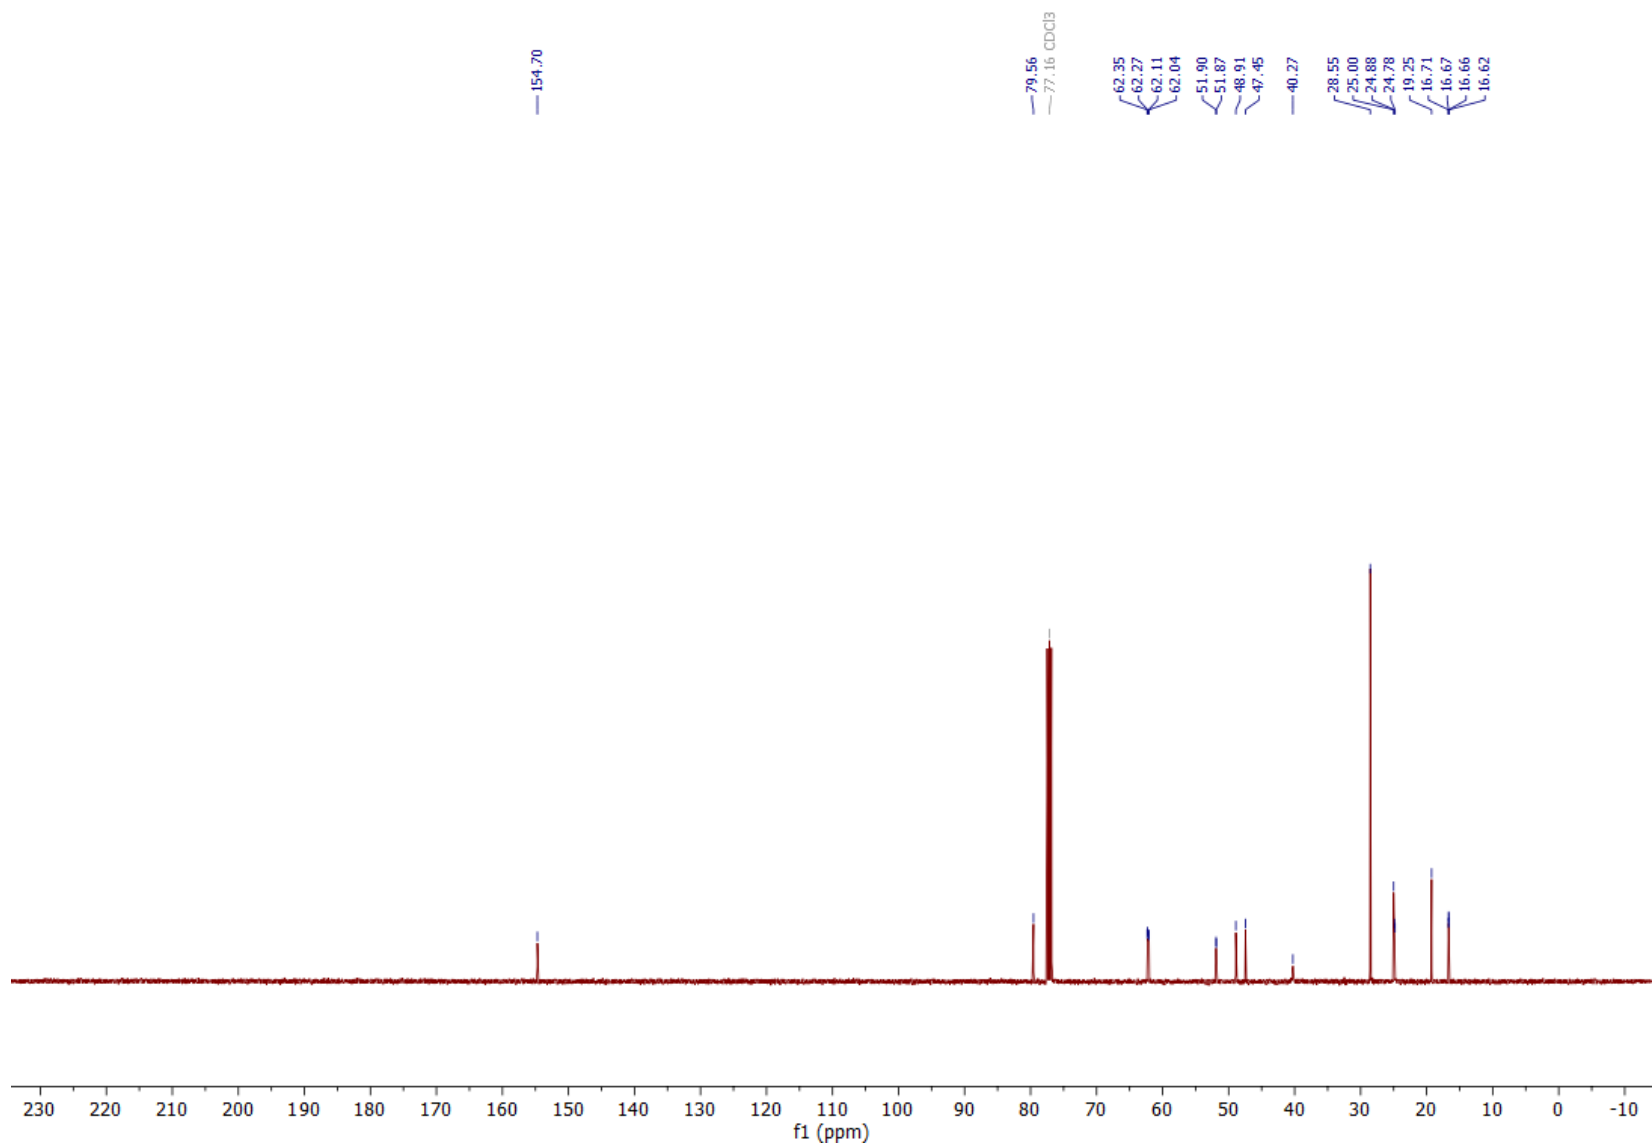

**Figure S8.** <sup>13</sup>C NMR spectrum of **3** diastereomer **1**.



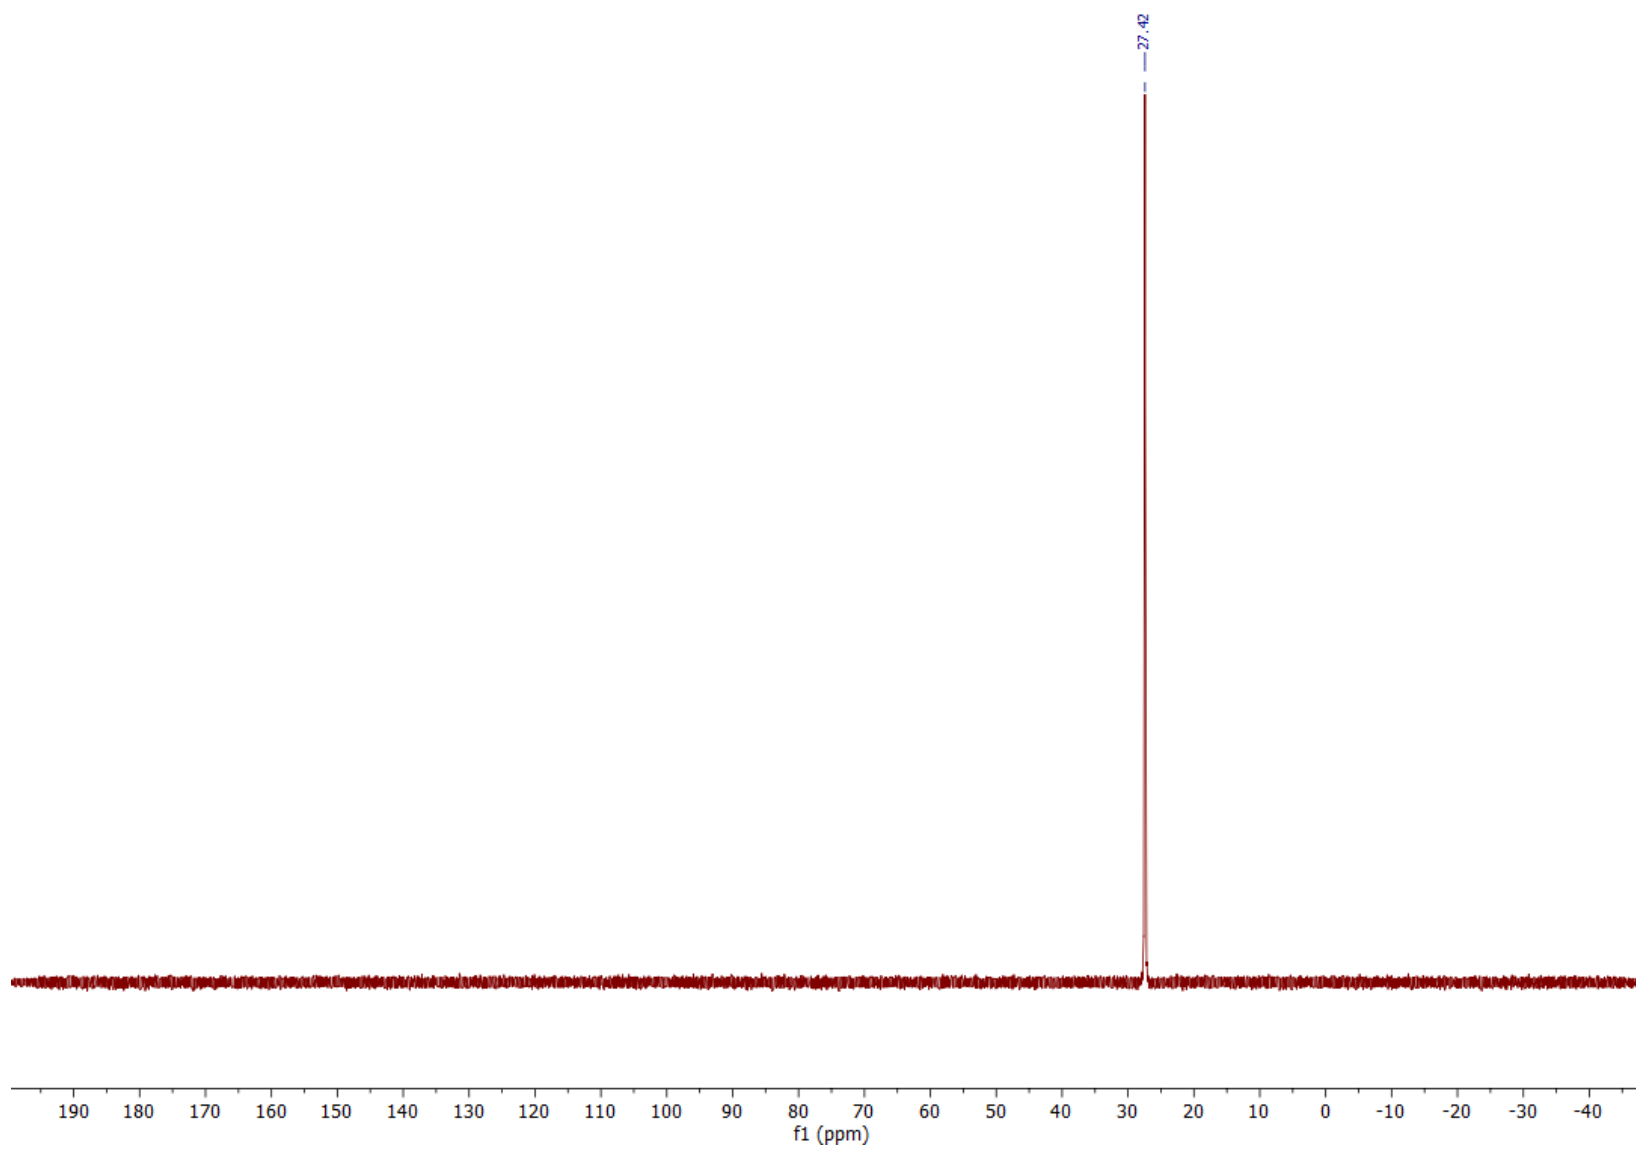

**Figure S9.**  $^{31}\text{P}$  NMR spectrum of **2** diastereomer **1**.

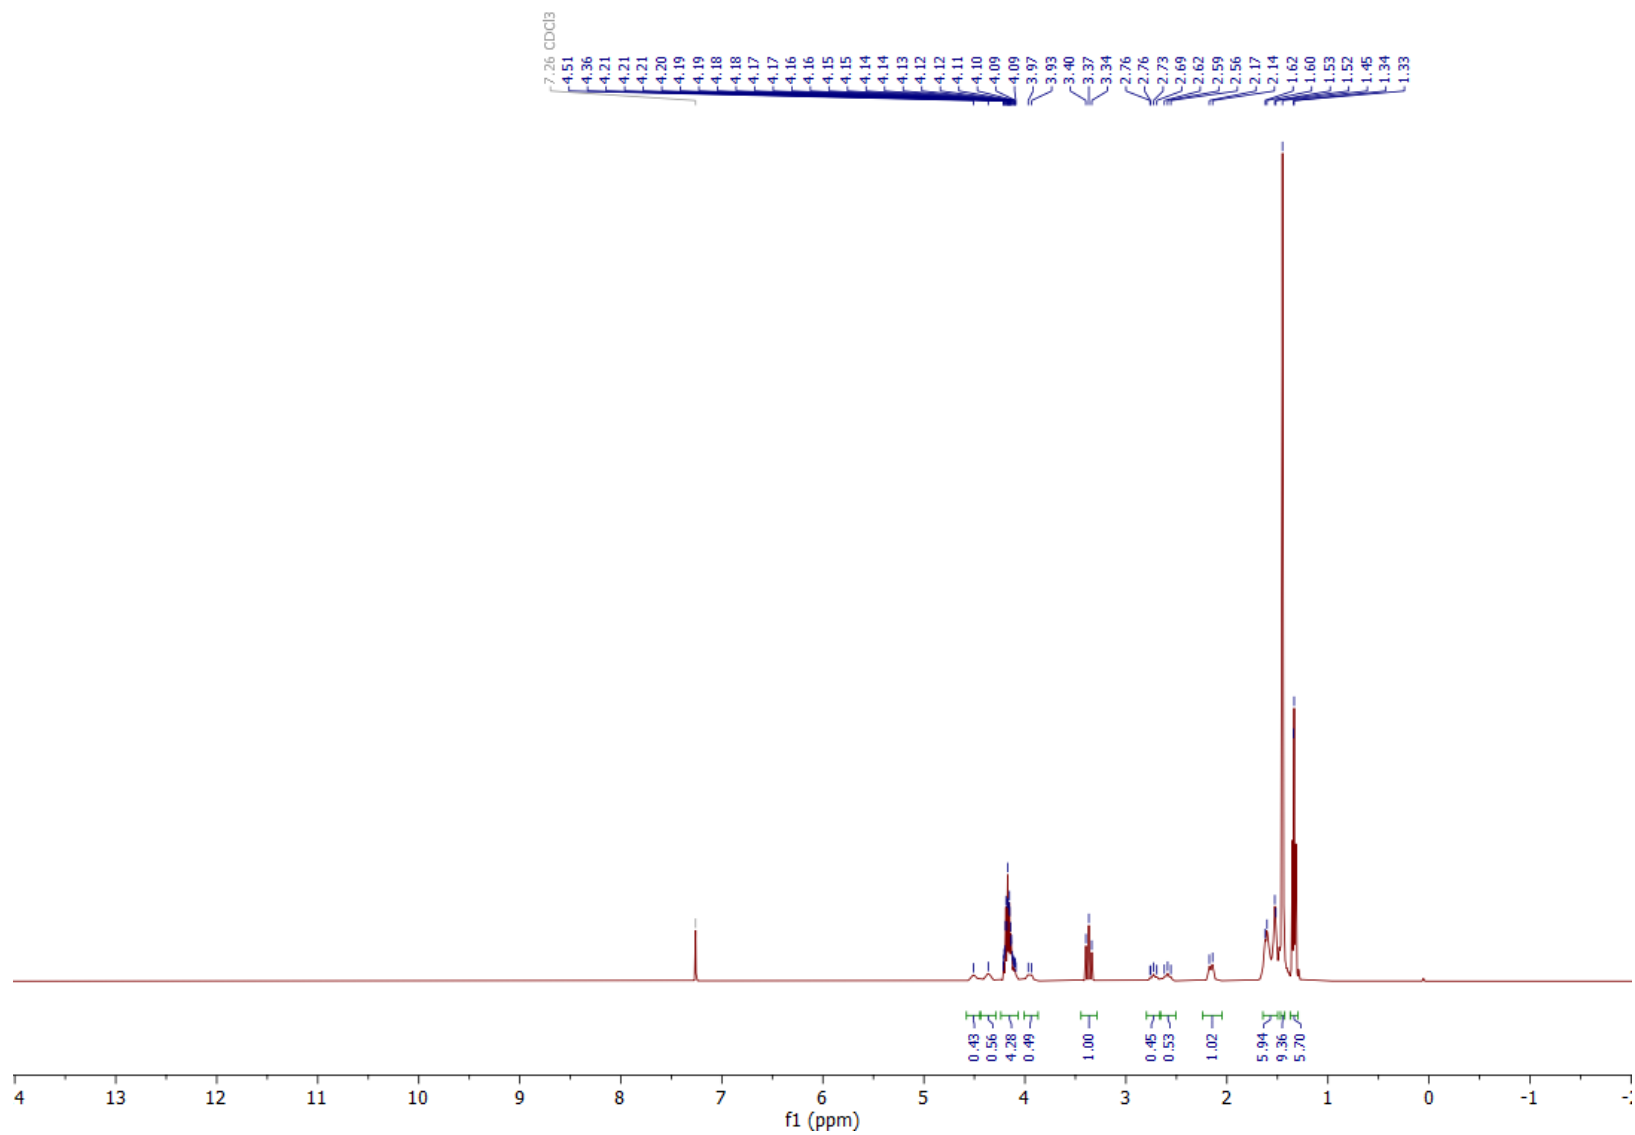

**Figure S10.**  $^1\text{H}$  NMR spectrum of **3** diastereomer **2**.

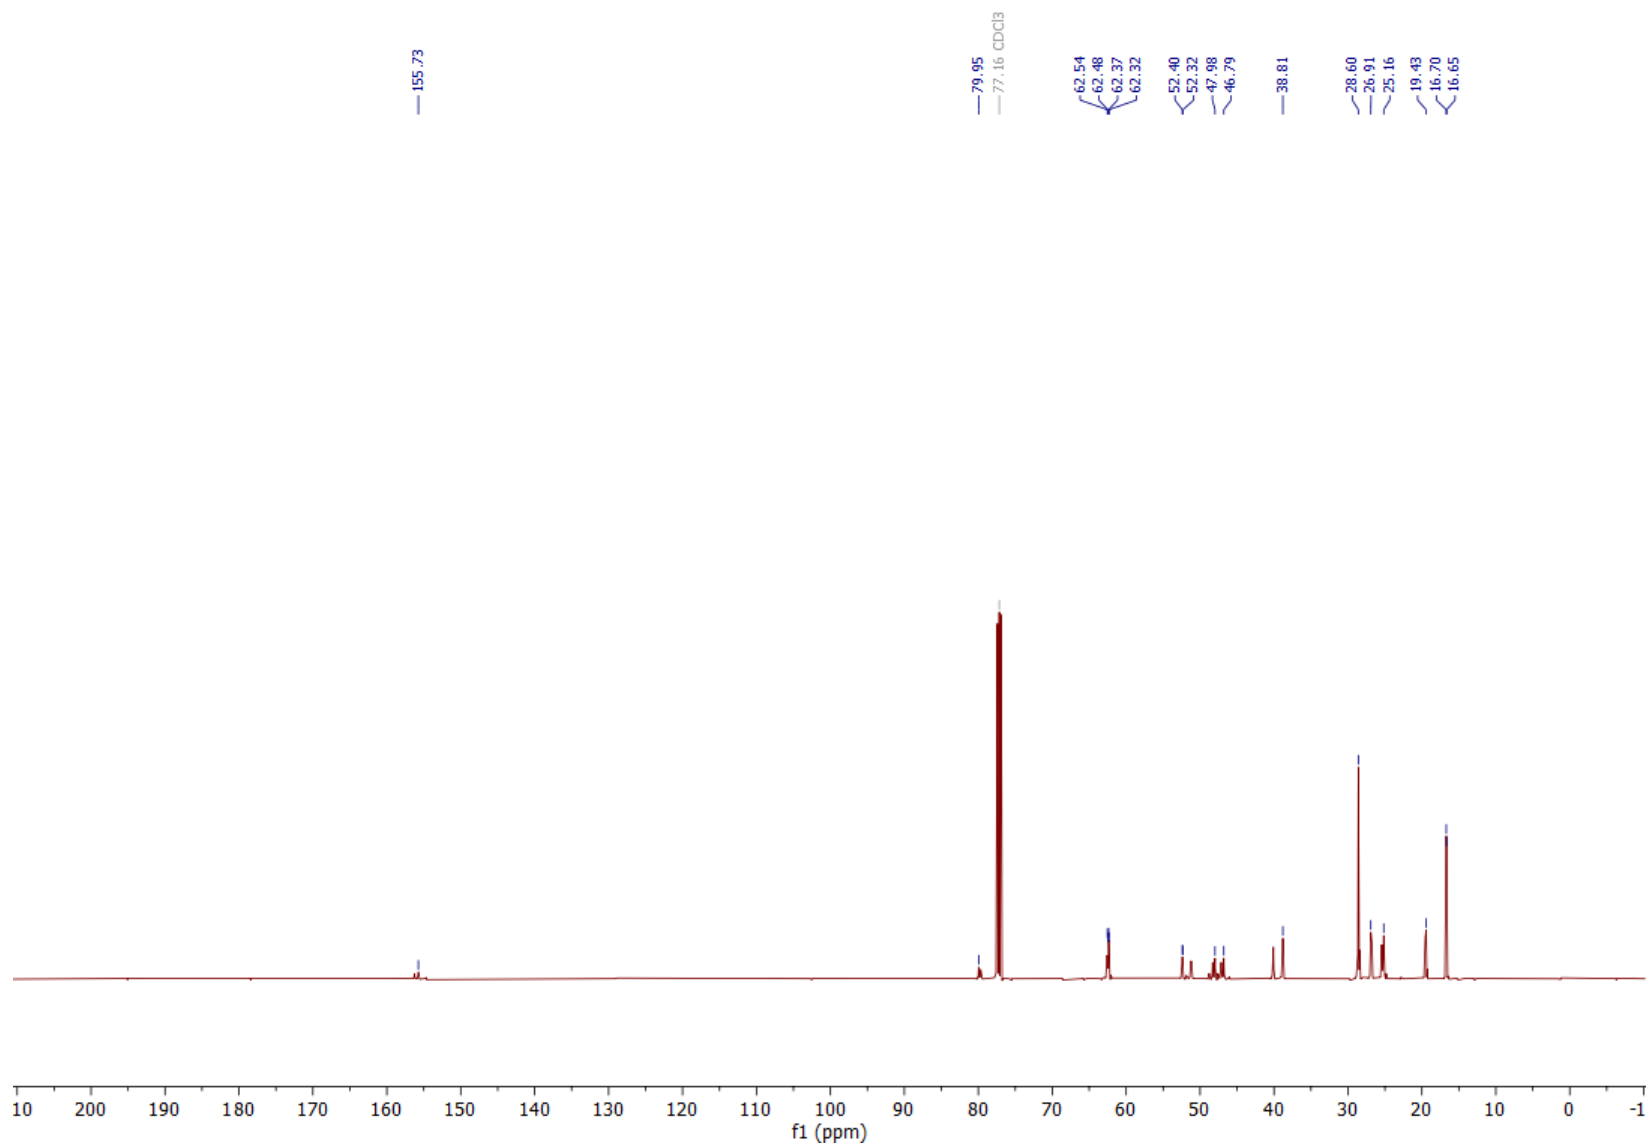

**Figure S11.**  $^{13}\text{C}$  NMR spectrum of **3** diastereomer 2.

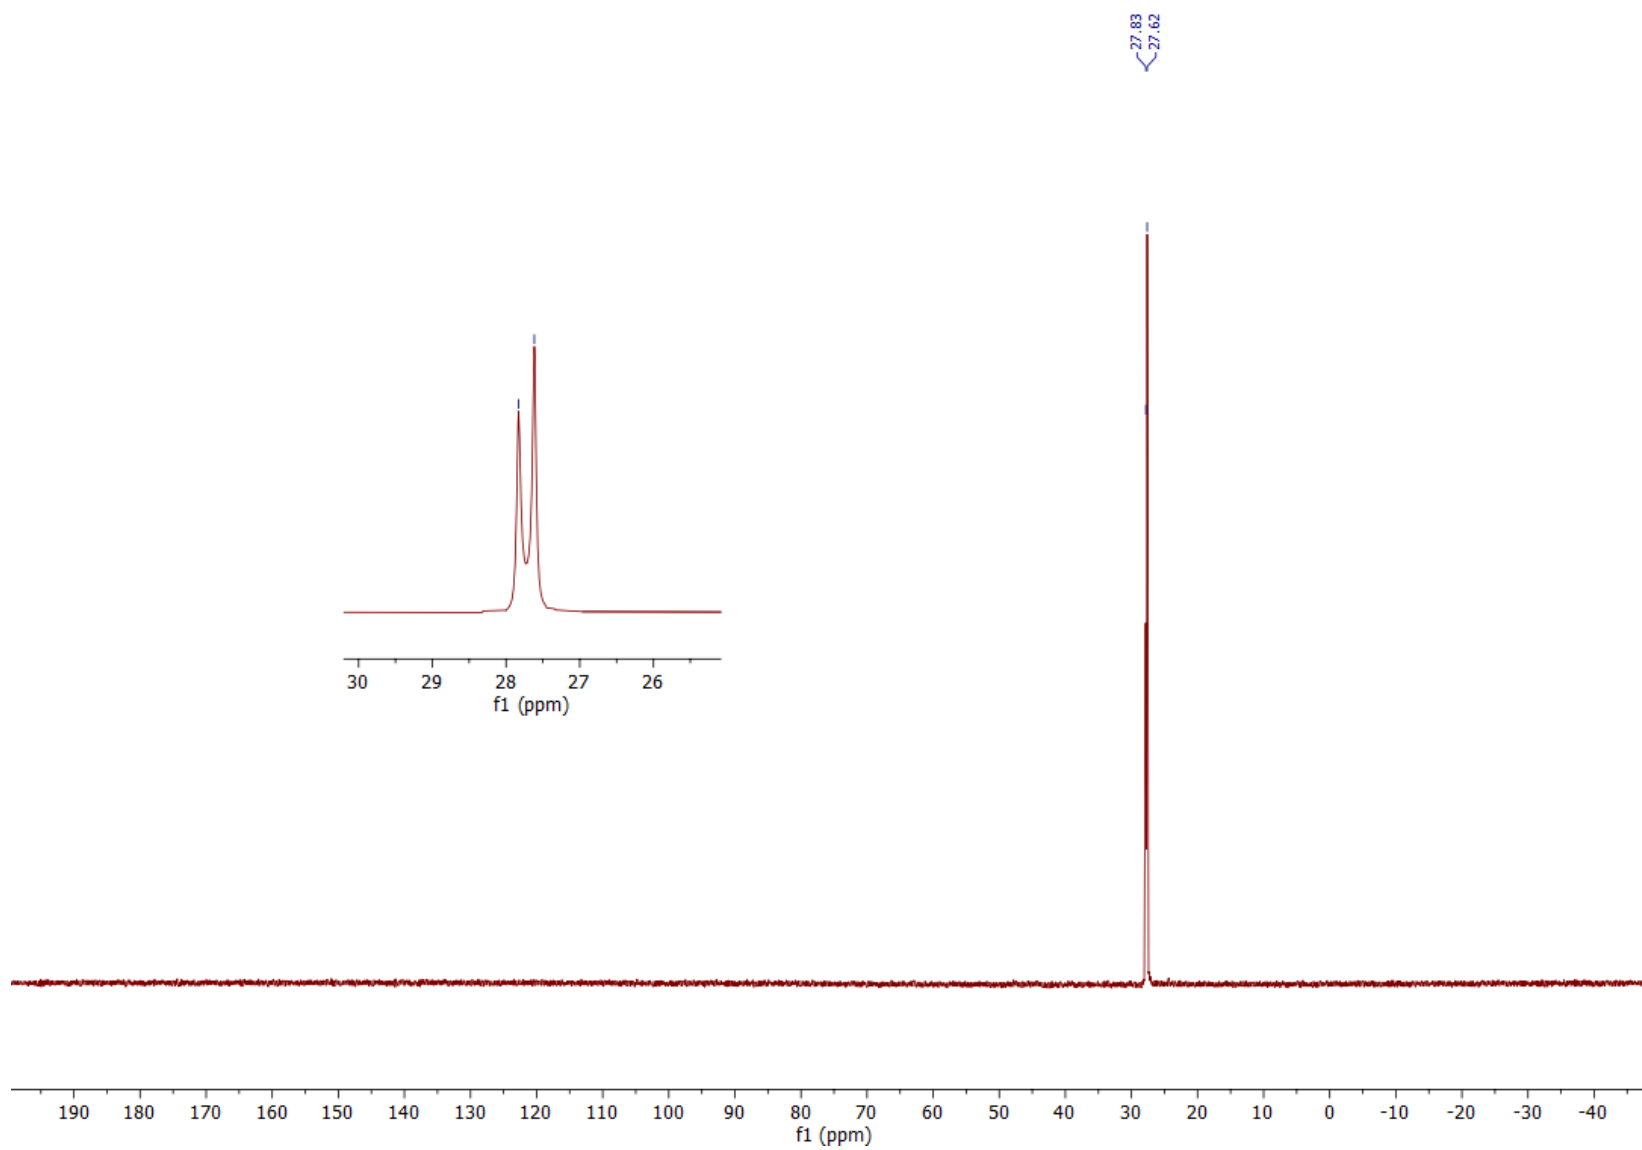

**Figure S12.**  $^{31}\text{P}$  NMR spectrum of **3** diastereomer **2**.

*Tert*-butyl 2-((diethoxyphosphoryl)(2-(4-methyl-2-thioxo-2,3-dihydrothiazol-5-yl)acetamido)methyl)piperidine-1-carboxylate (**4a**)

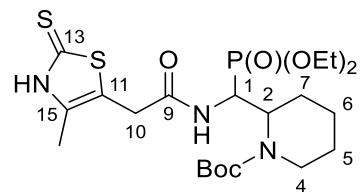

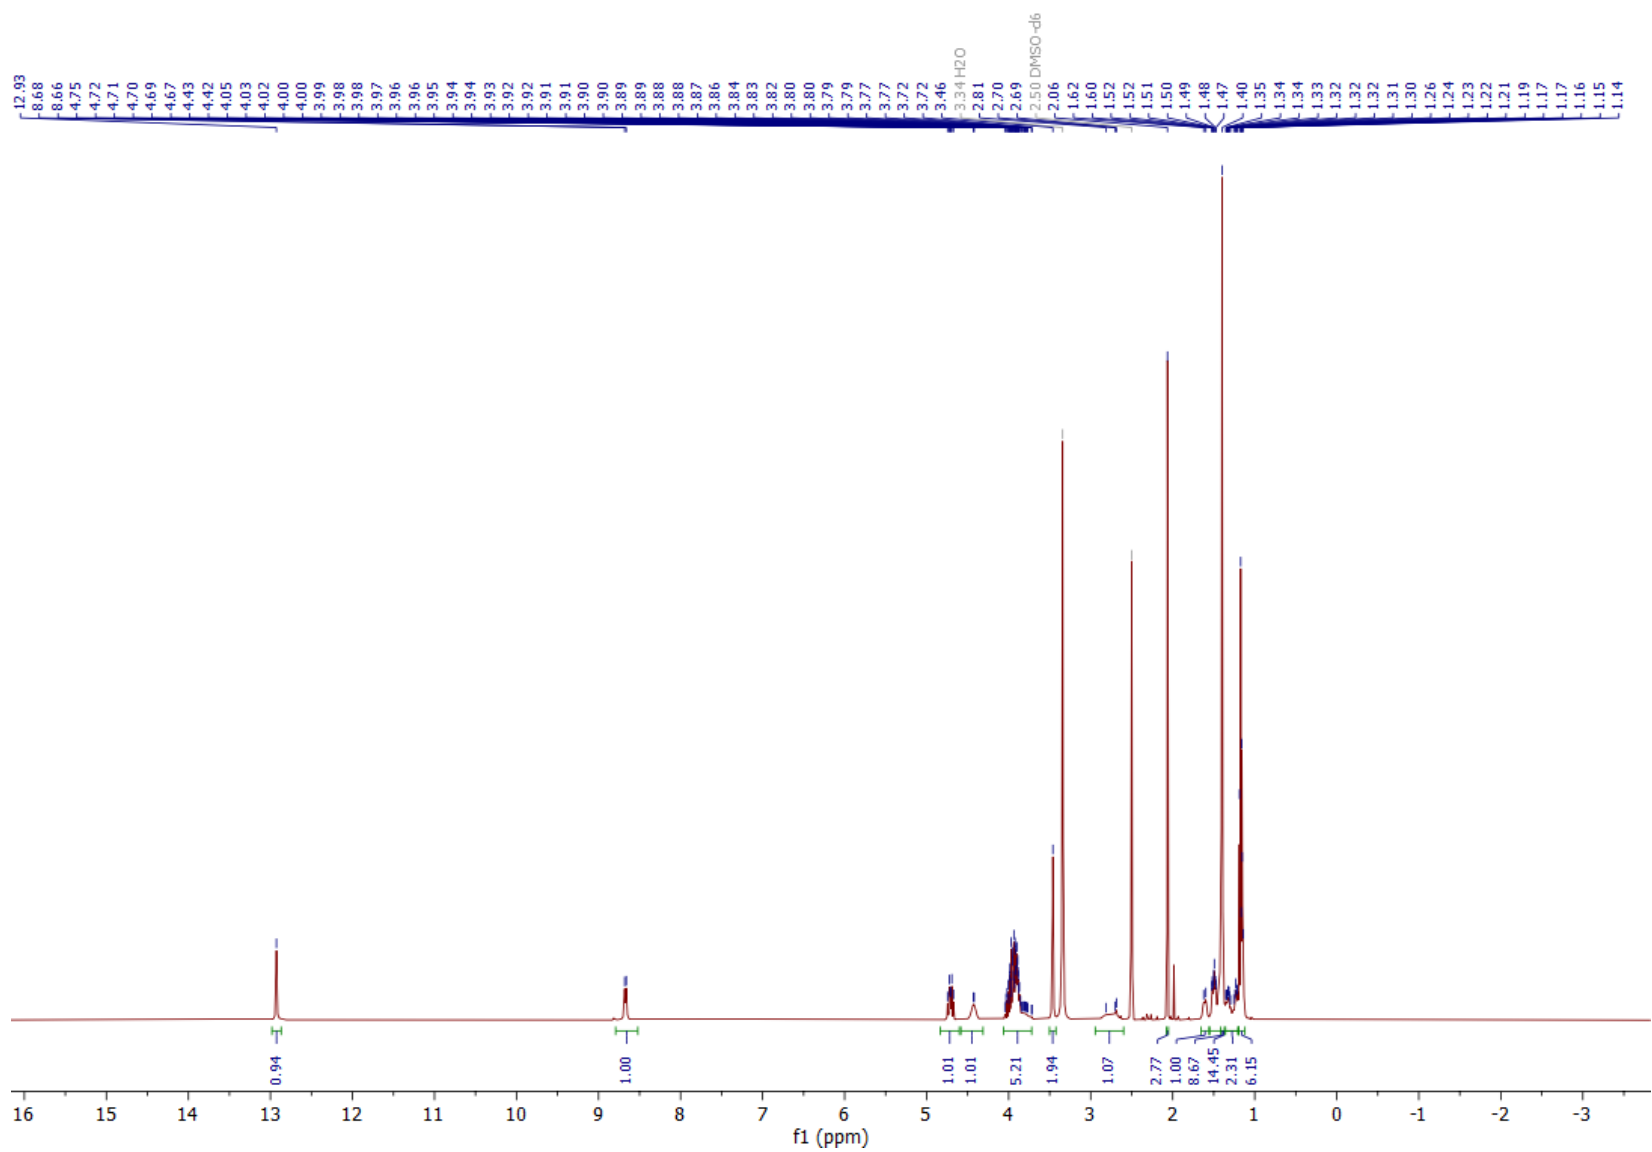

Figure S13. <sup>1</sup>H NMR spectrum of **4a** diastereomer 1.

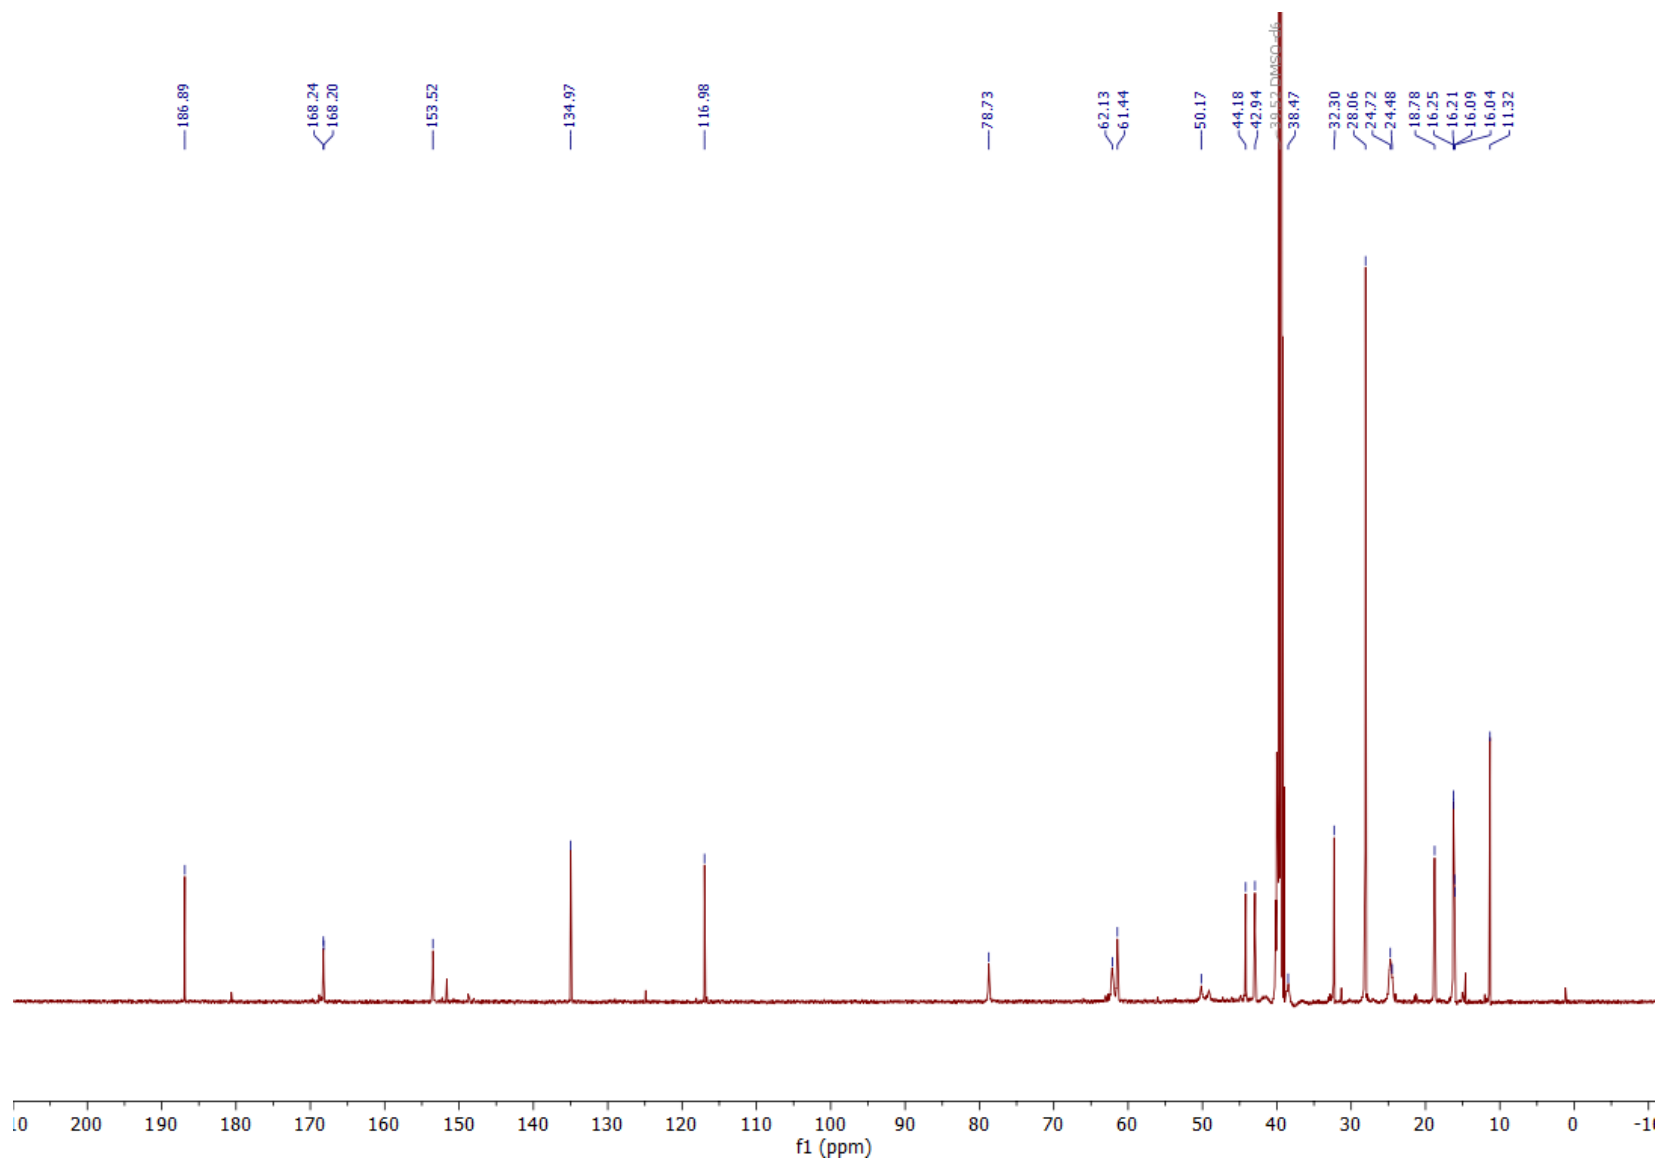

**Figure S14.** <sup>13</sup>C NMR spectrum of **4a** diastereomer 1.

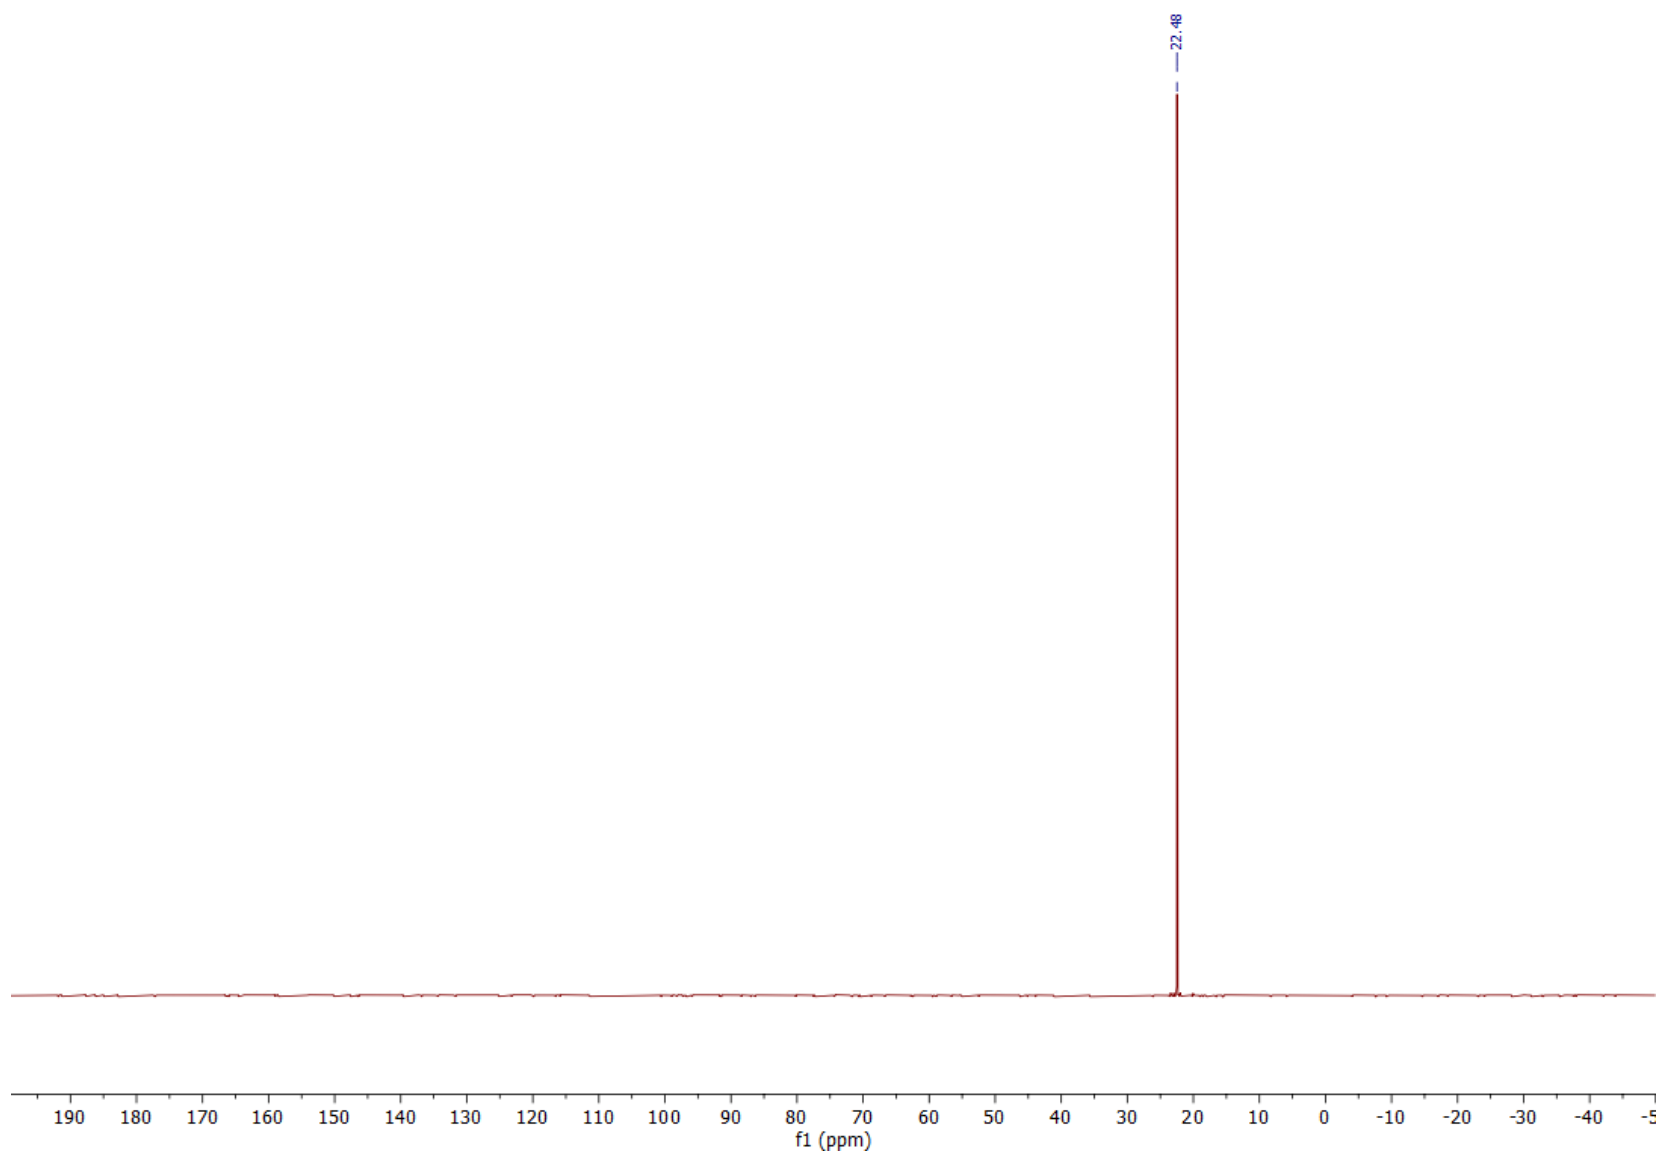

**Figure S15.**  $^{31}\text{P}$  NMR spectrum of **4a** diastereomer 1.



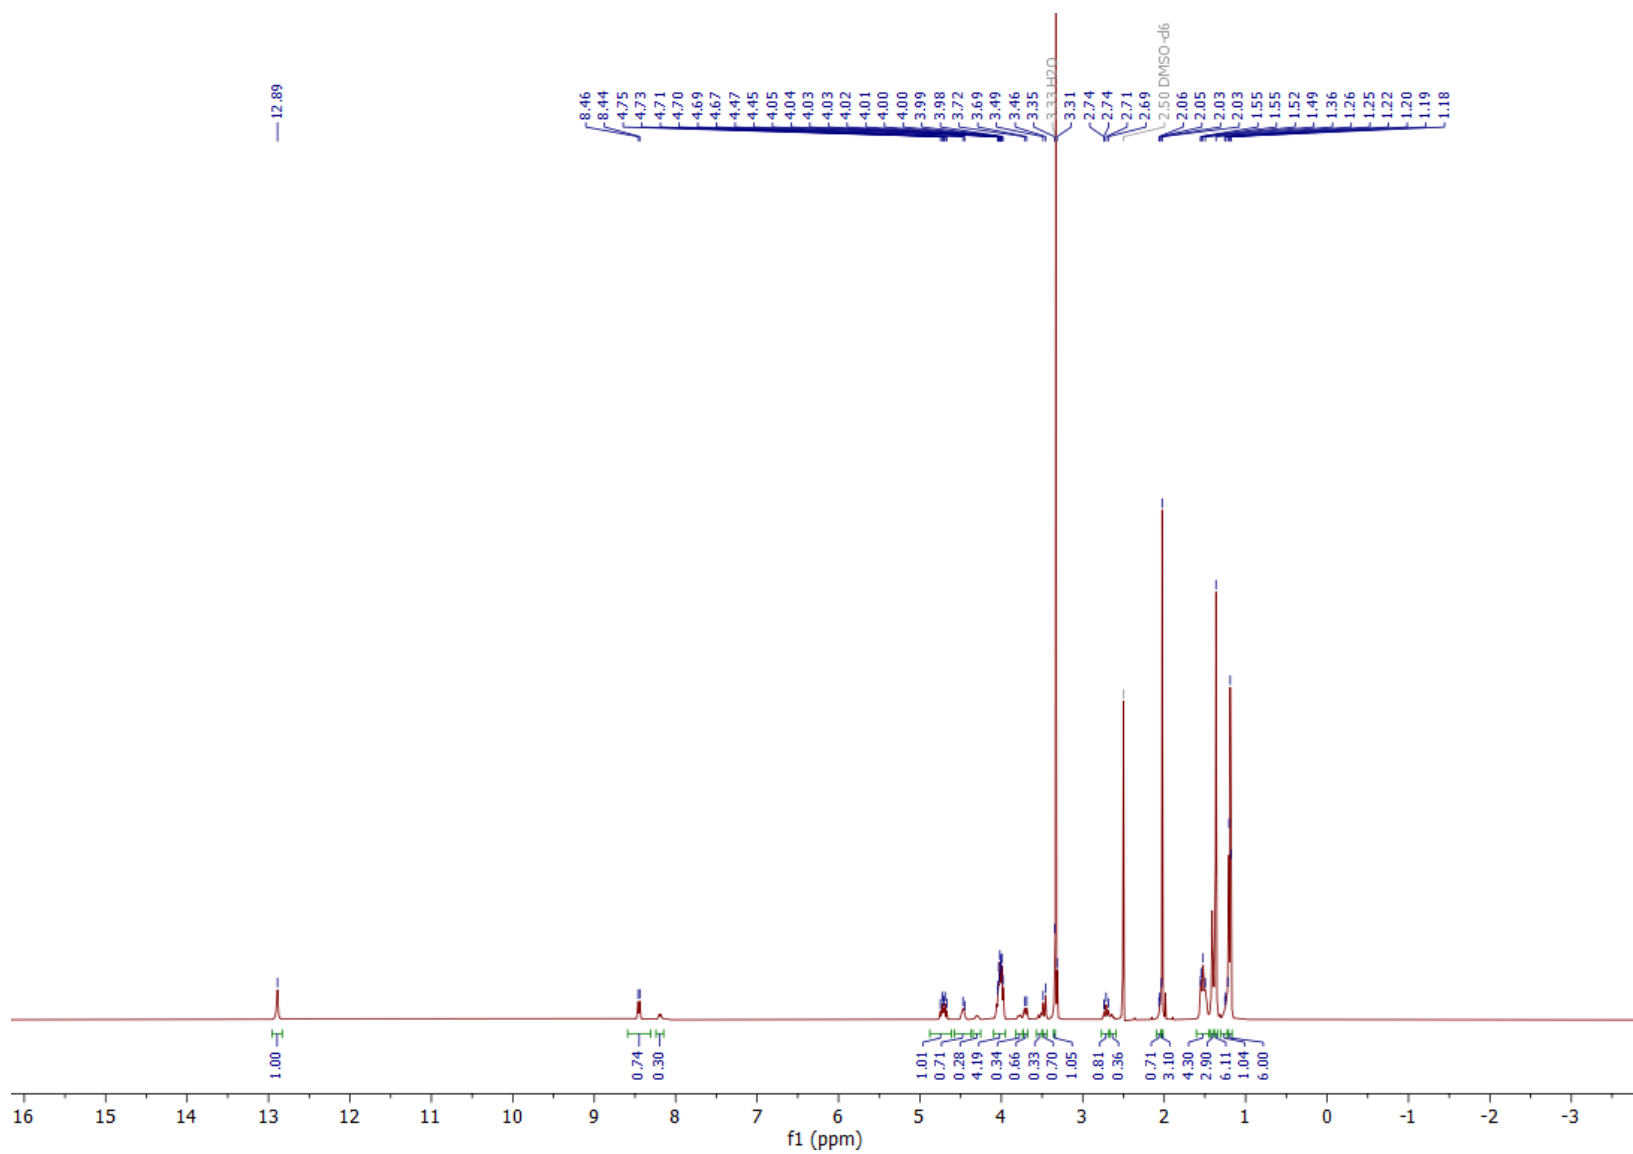

**Figure S16.**  $^1\text{H}$  NMR spectrum of **4a** diastereomer 2.

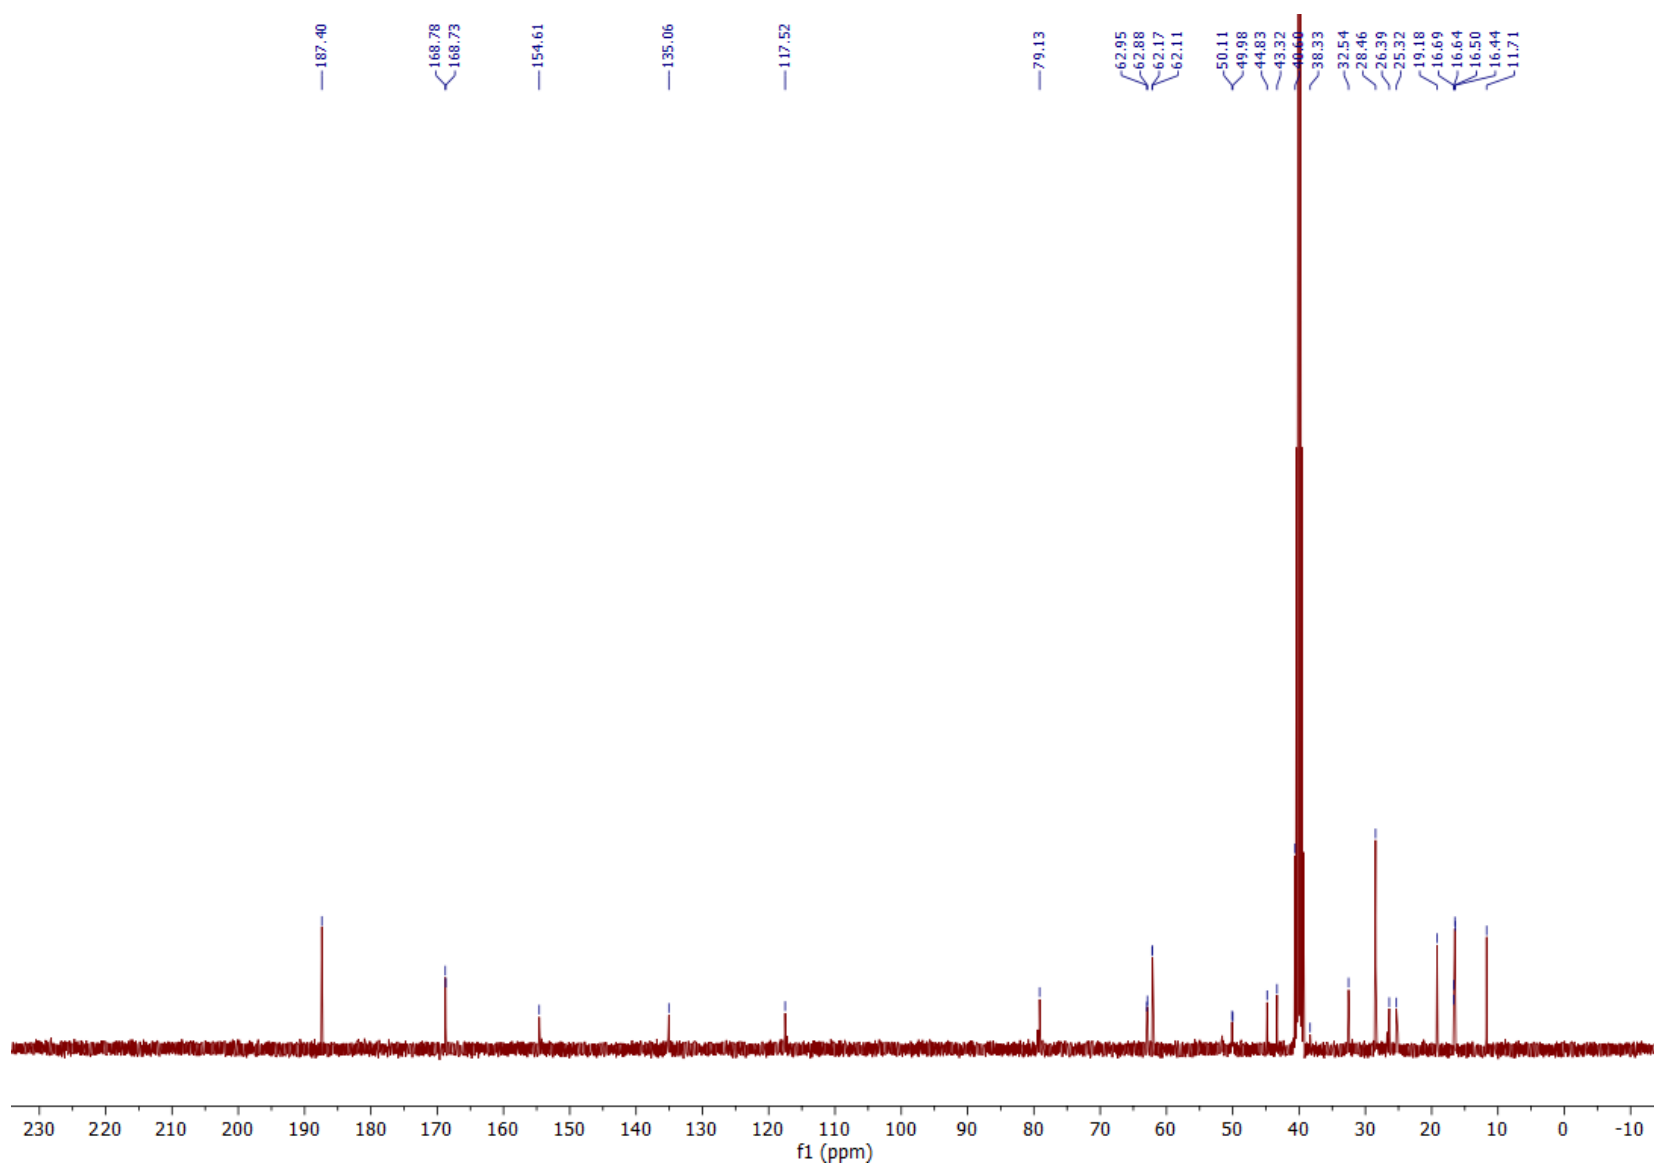

**Figure S17.**  $^{13}\text{C}$  NMR spectrum of **4a** diastereomer 2.

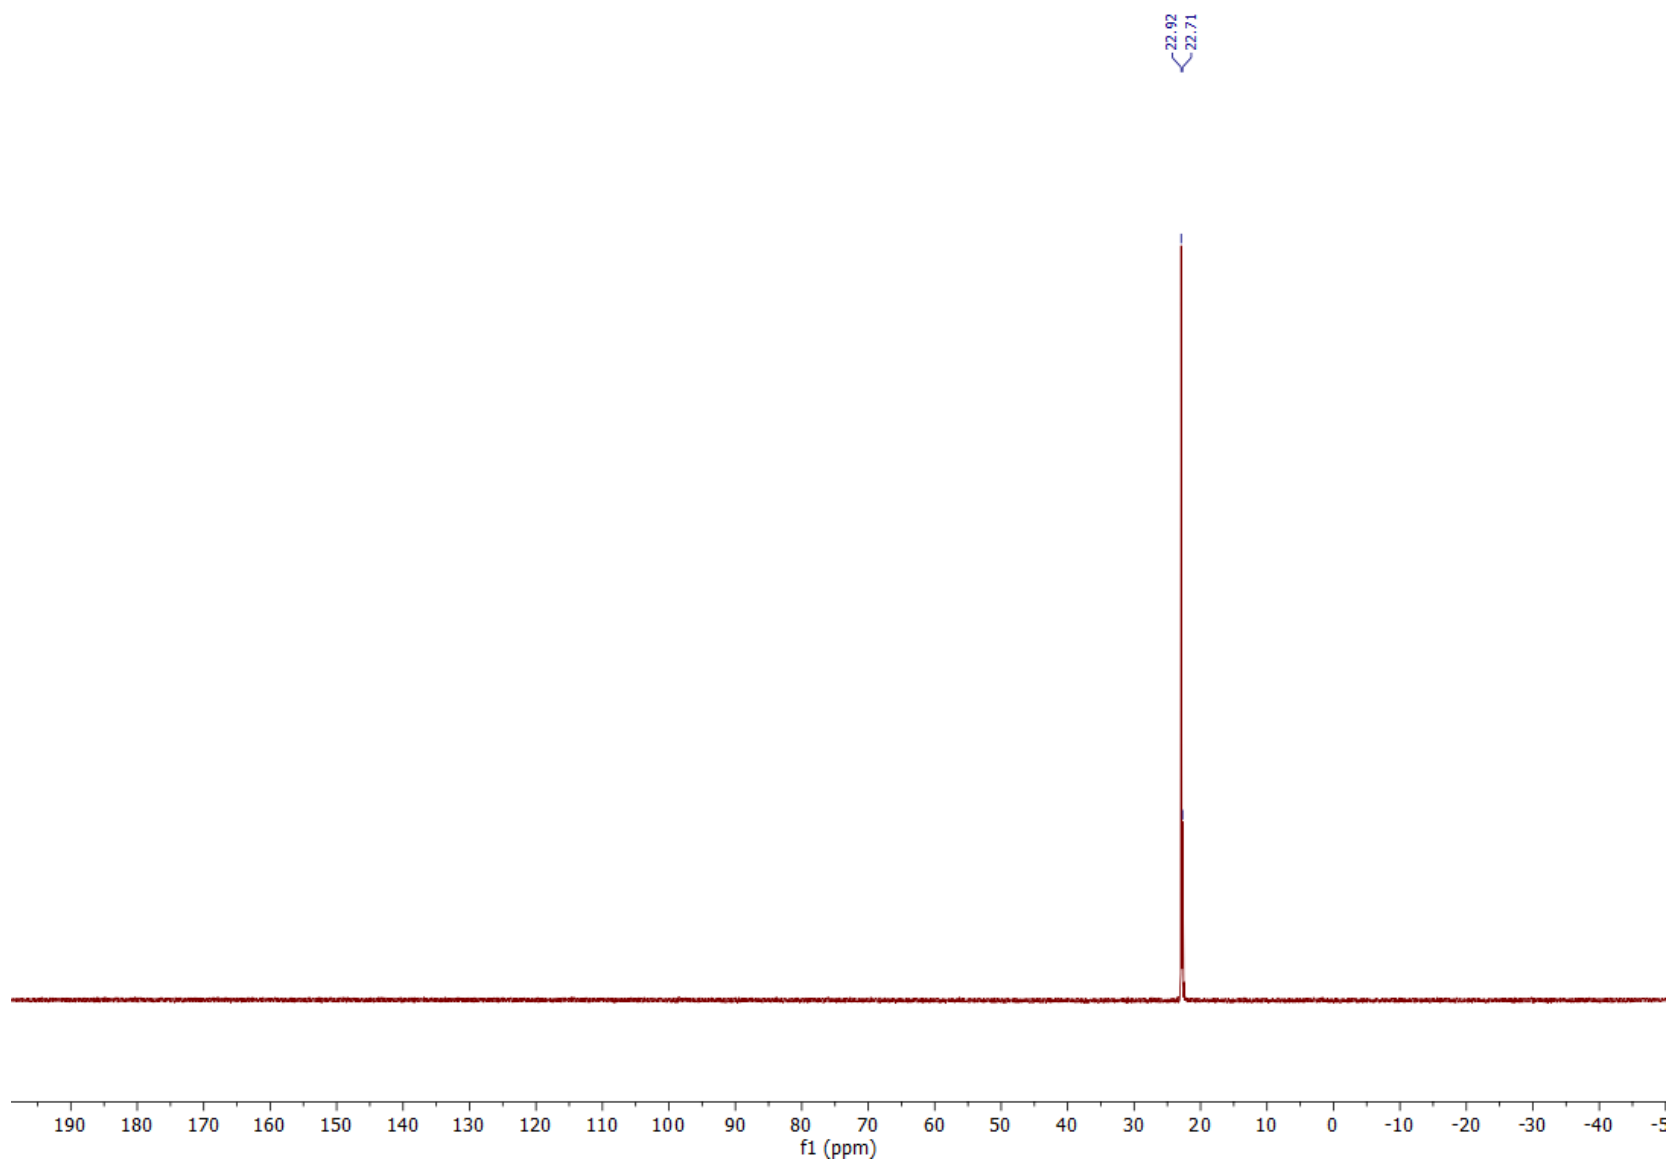

**Figure S18.**  $^{31}\text{P}$  NMR spectrum of **4a** diastereomer 2.

*Tert*-butyl 2-((diethoxyphosphoryl)(thiophene-2-carboxamido)methyl)piperidine-1-carboxylate (**4b**)

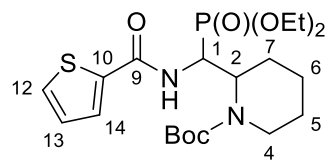

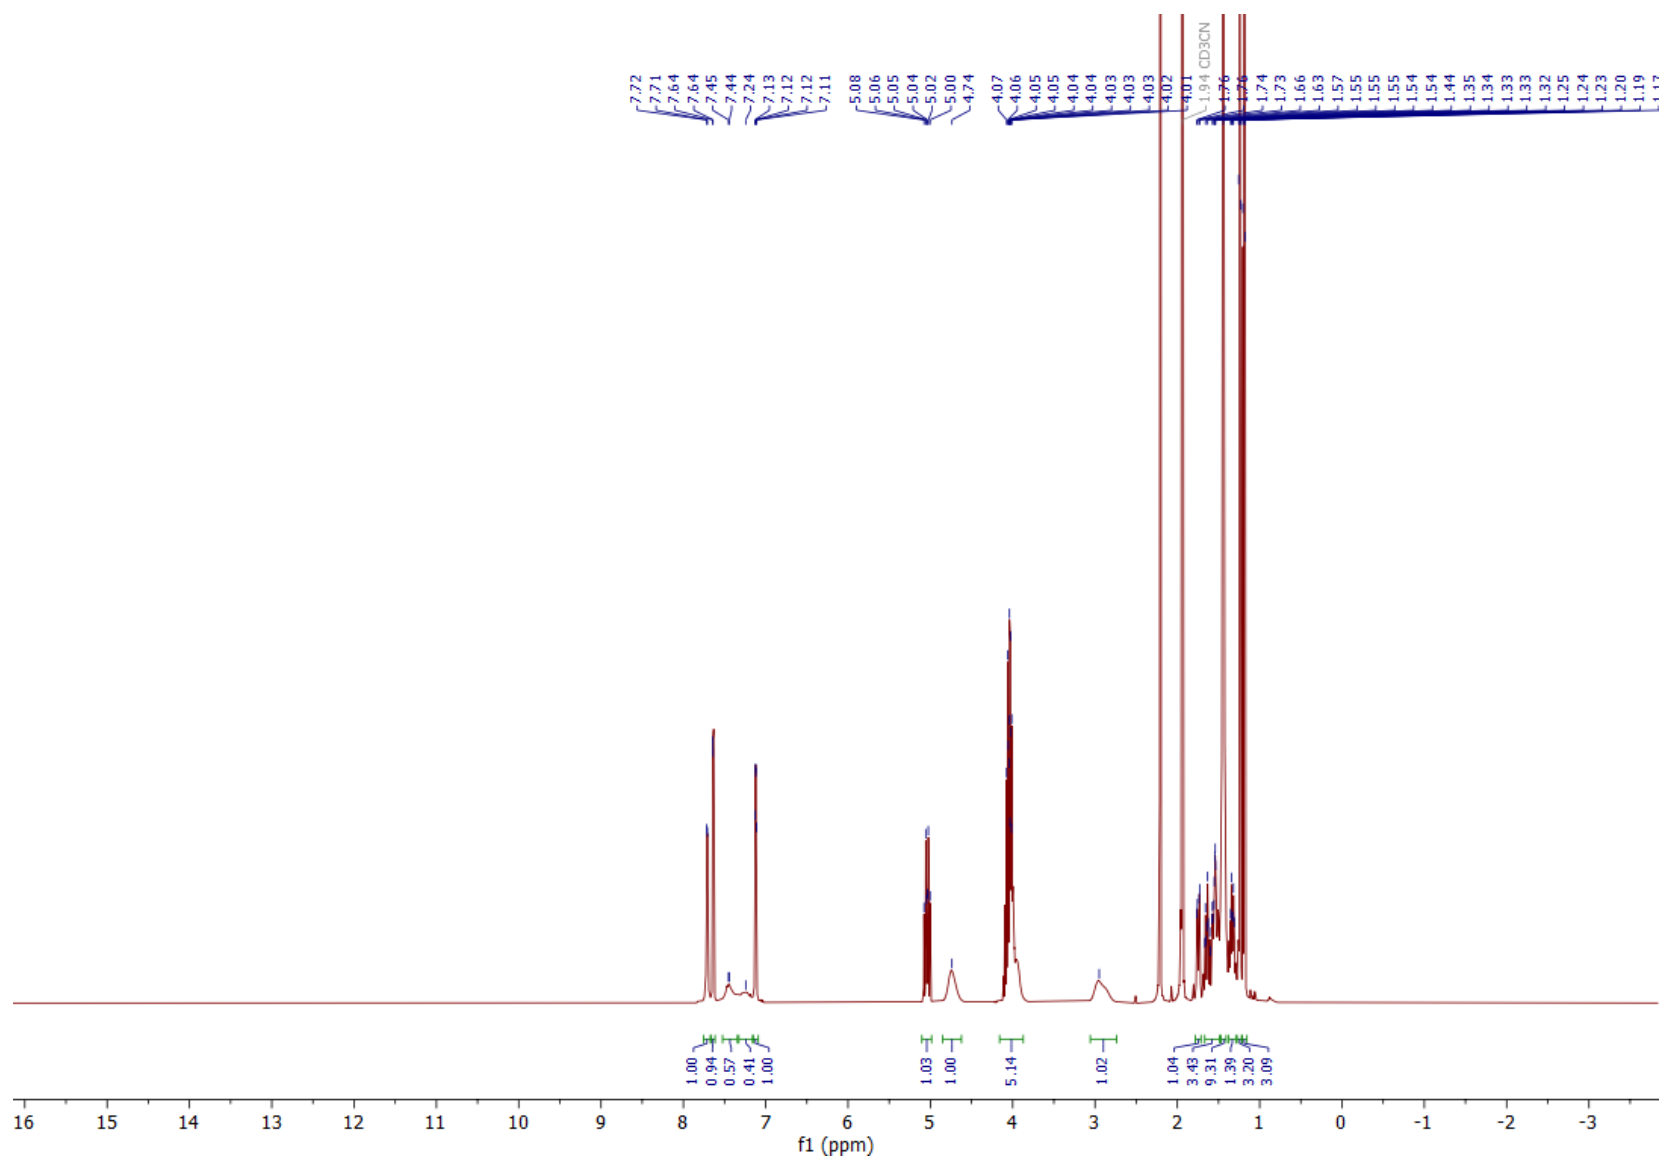

**Figure S19.** <sup>1</sup>H NMR spectrum of **4b** diastereomer 1.

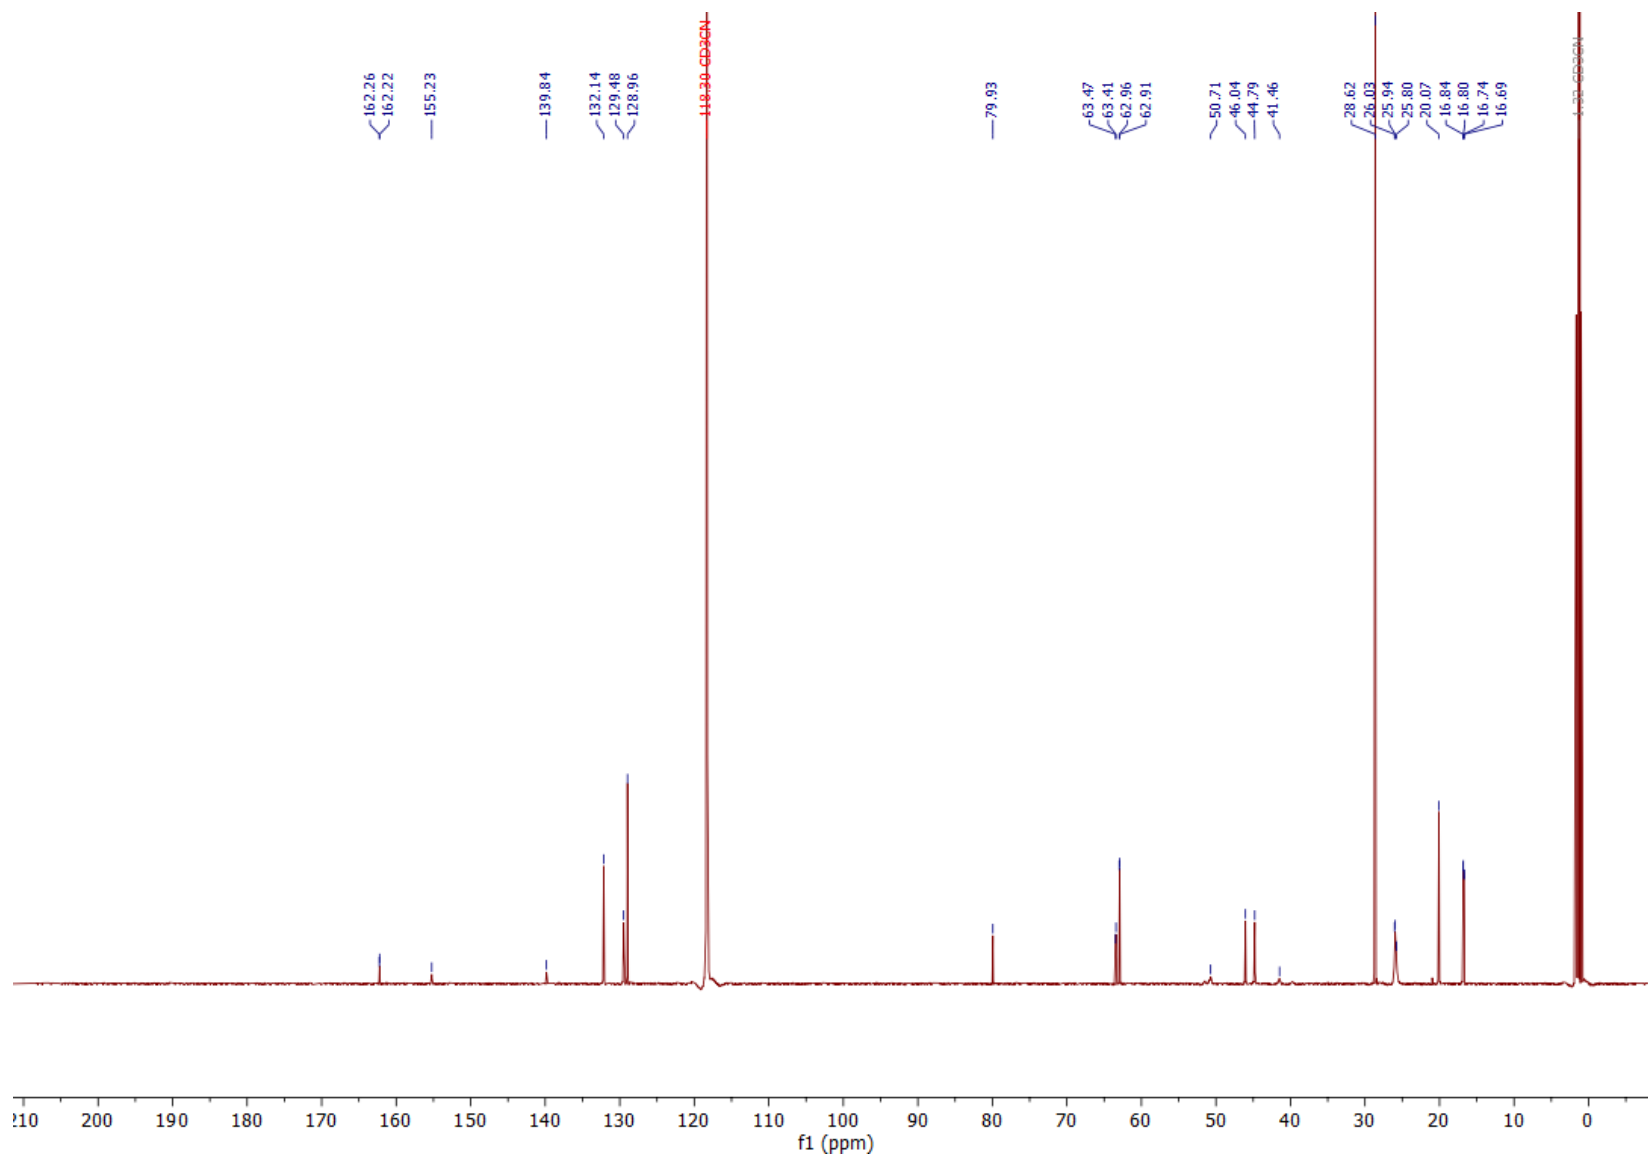

**Figure S20.** <sup>13</sup>C NMR spectrum of **4b** diastereomer 1.

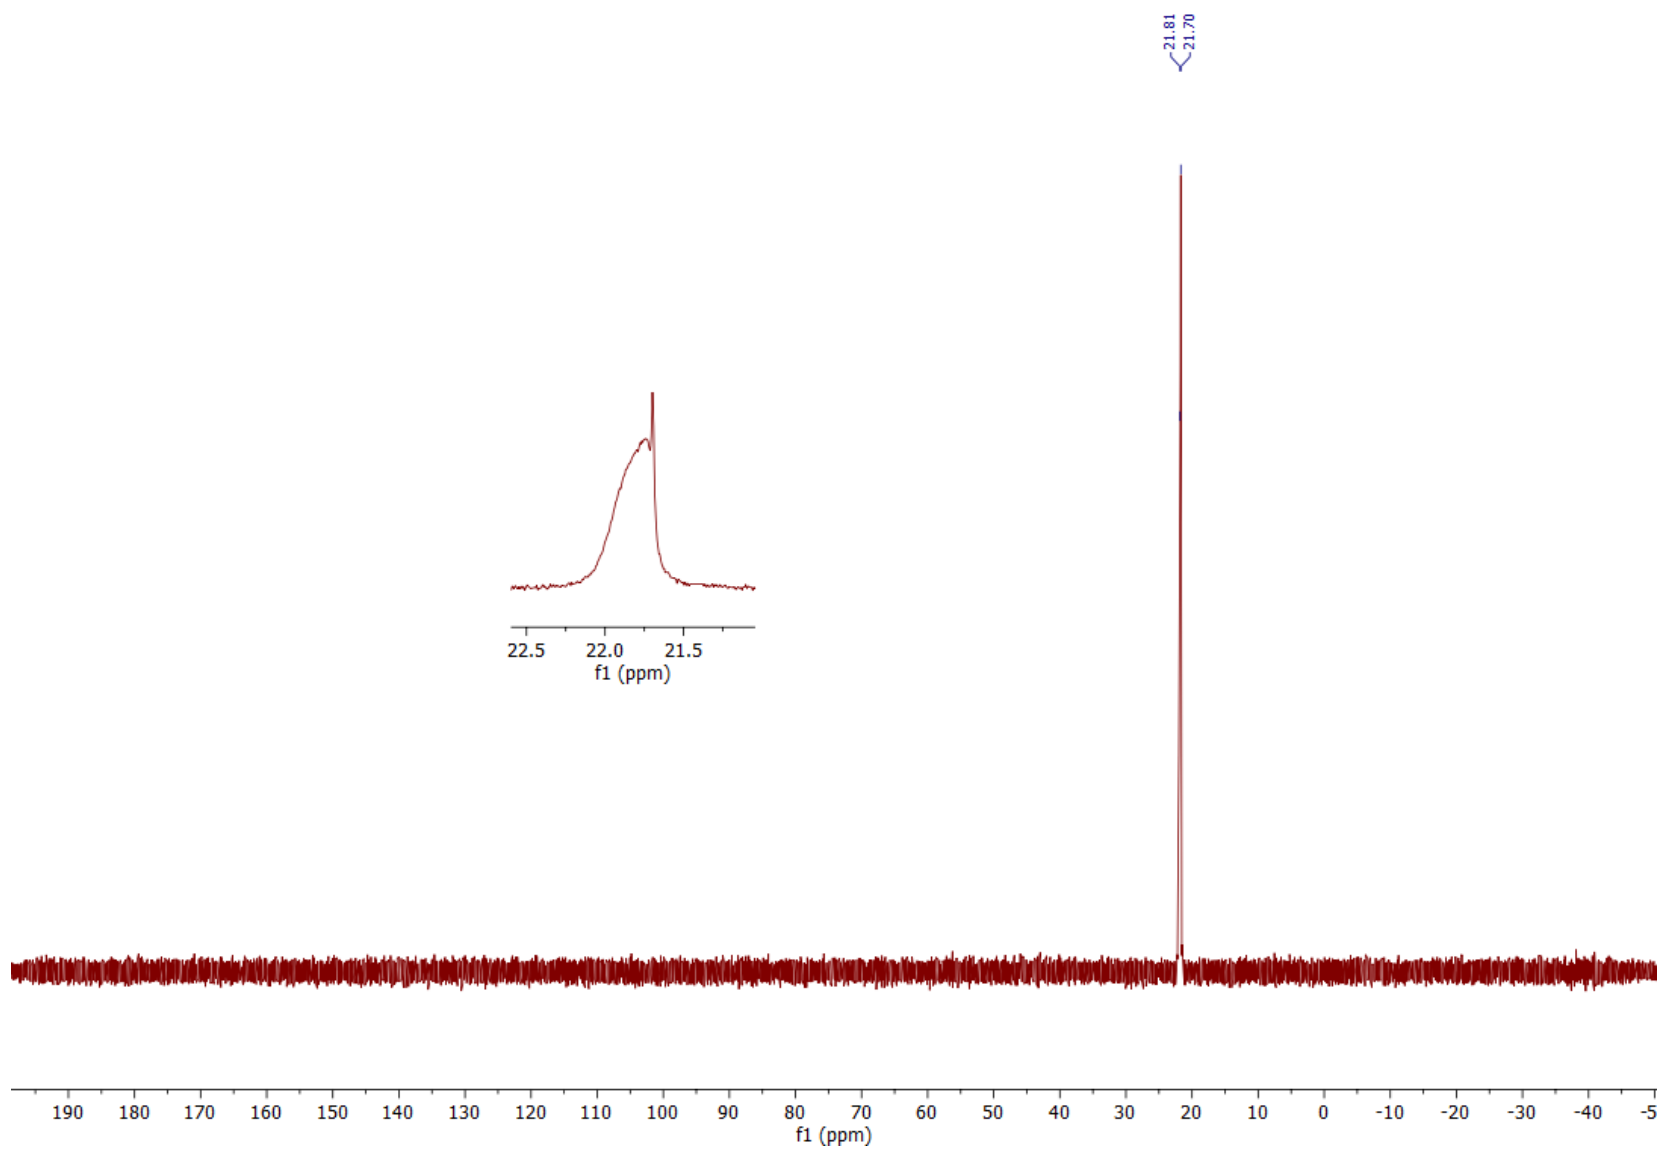

**Figure S21.**  $^{31}\text{P}$  NMR spectrum of **4b** diastereomer 1.

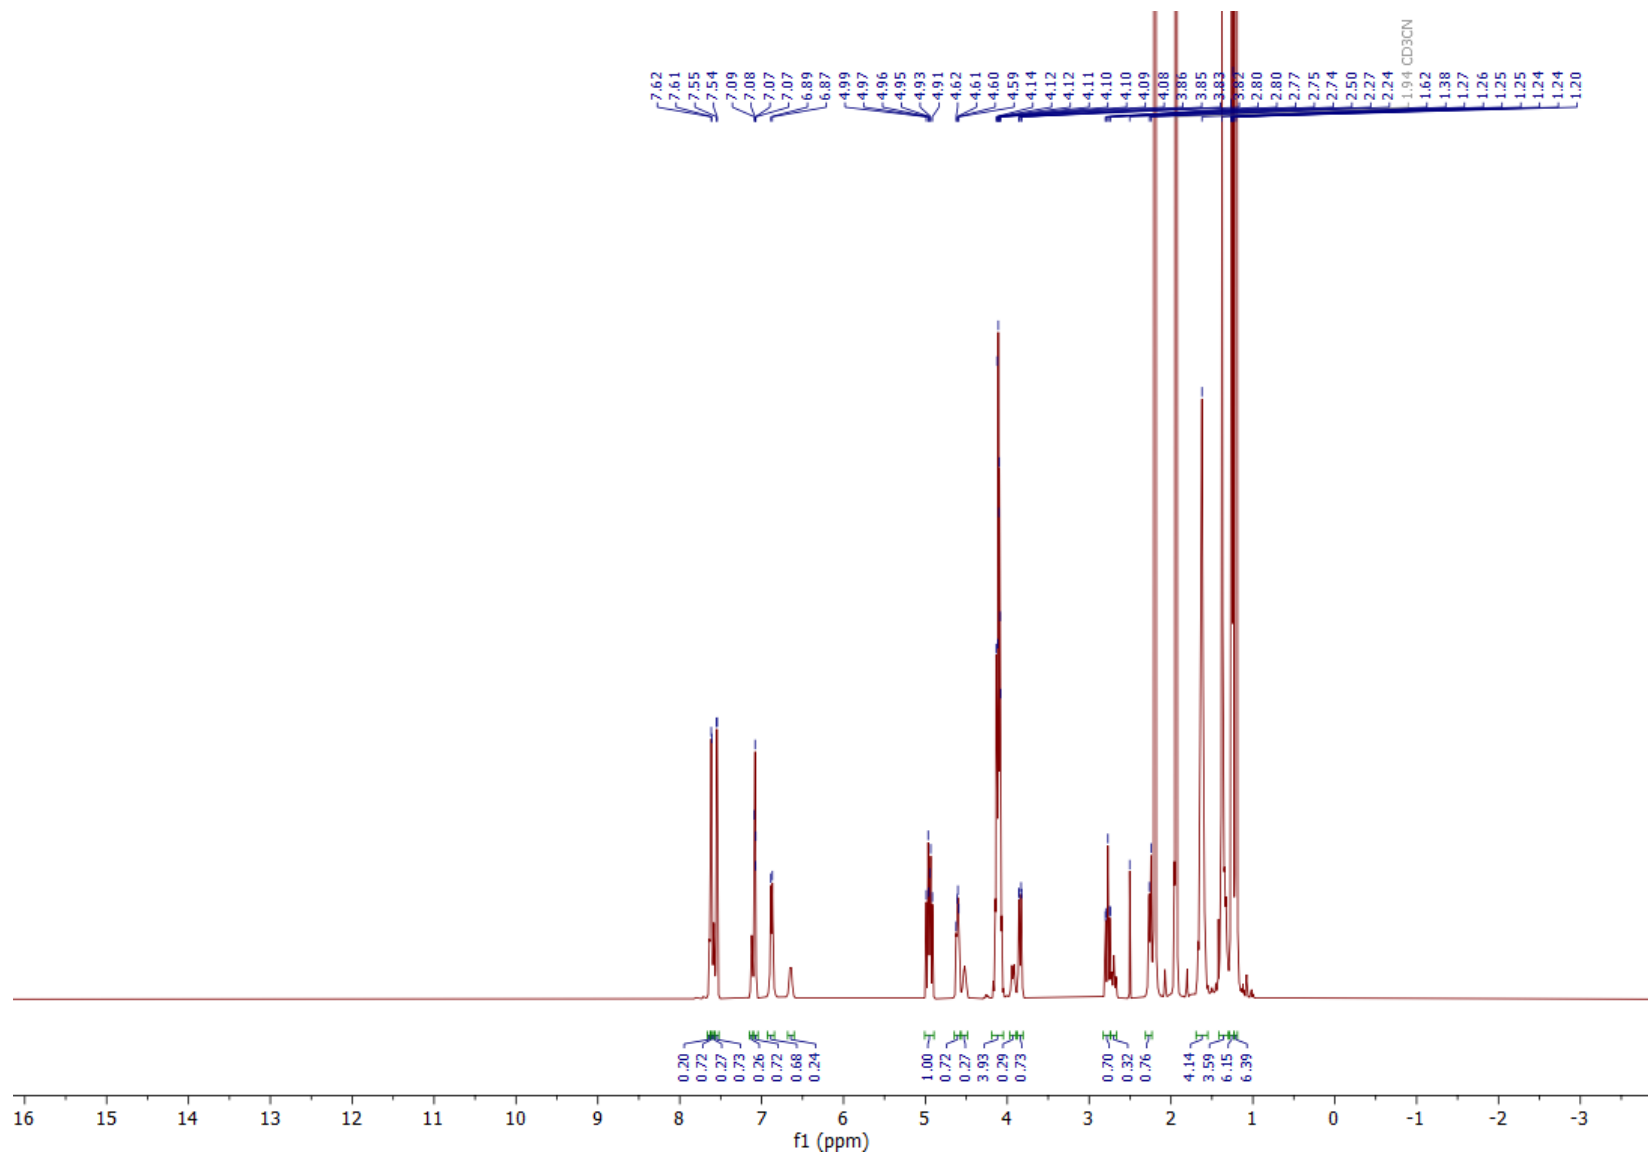

Figure S22.  $^1\text{H}$  NMR spectrum of **4b** diastereomer 2.



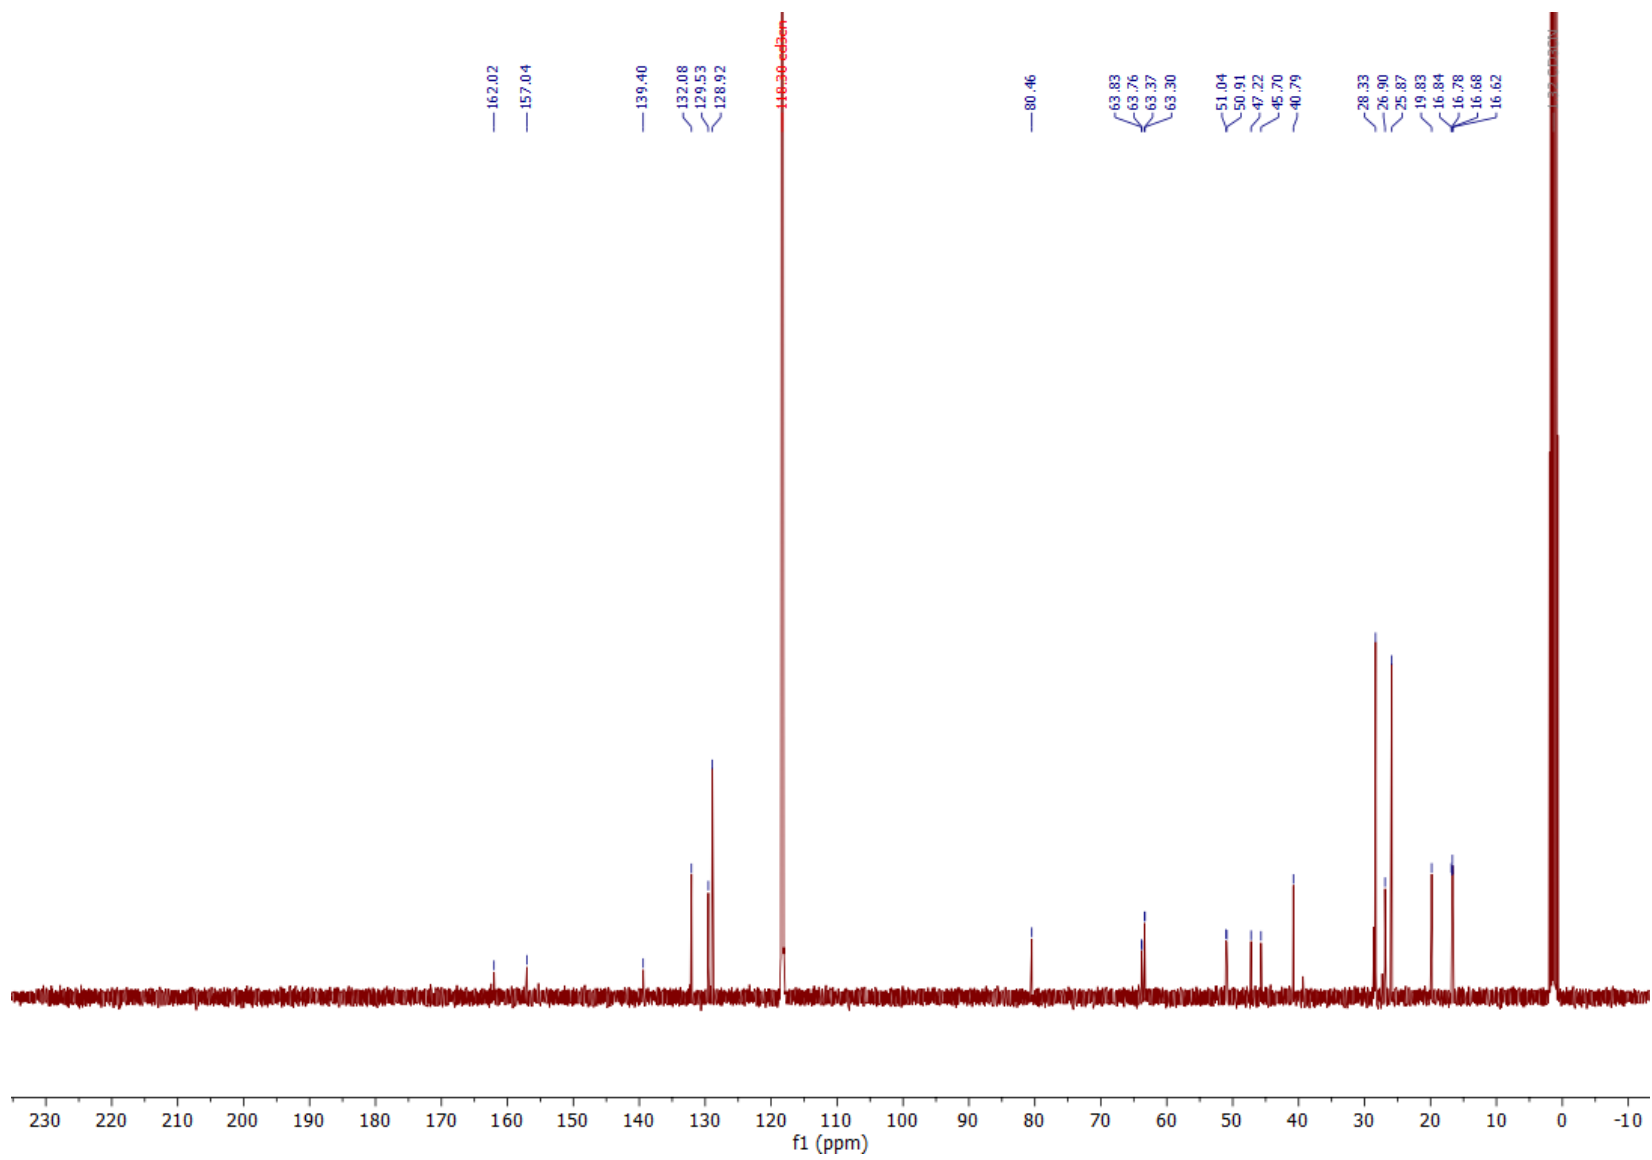

Figure S23.  $^{13}\text{C}$  NMR spectrum of **4b** diastereomer 2.

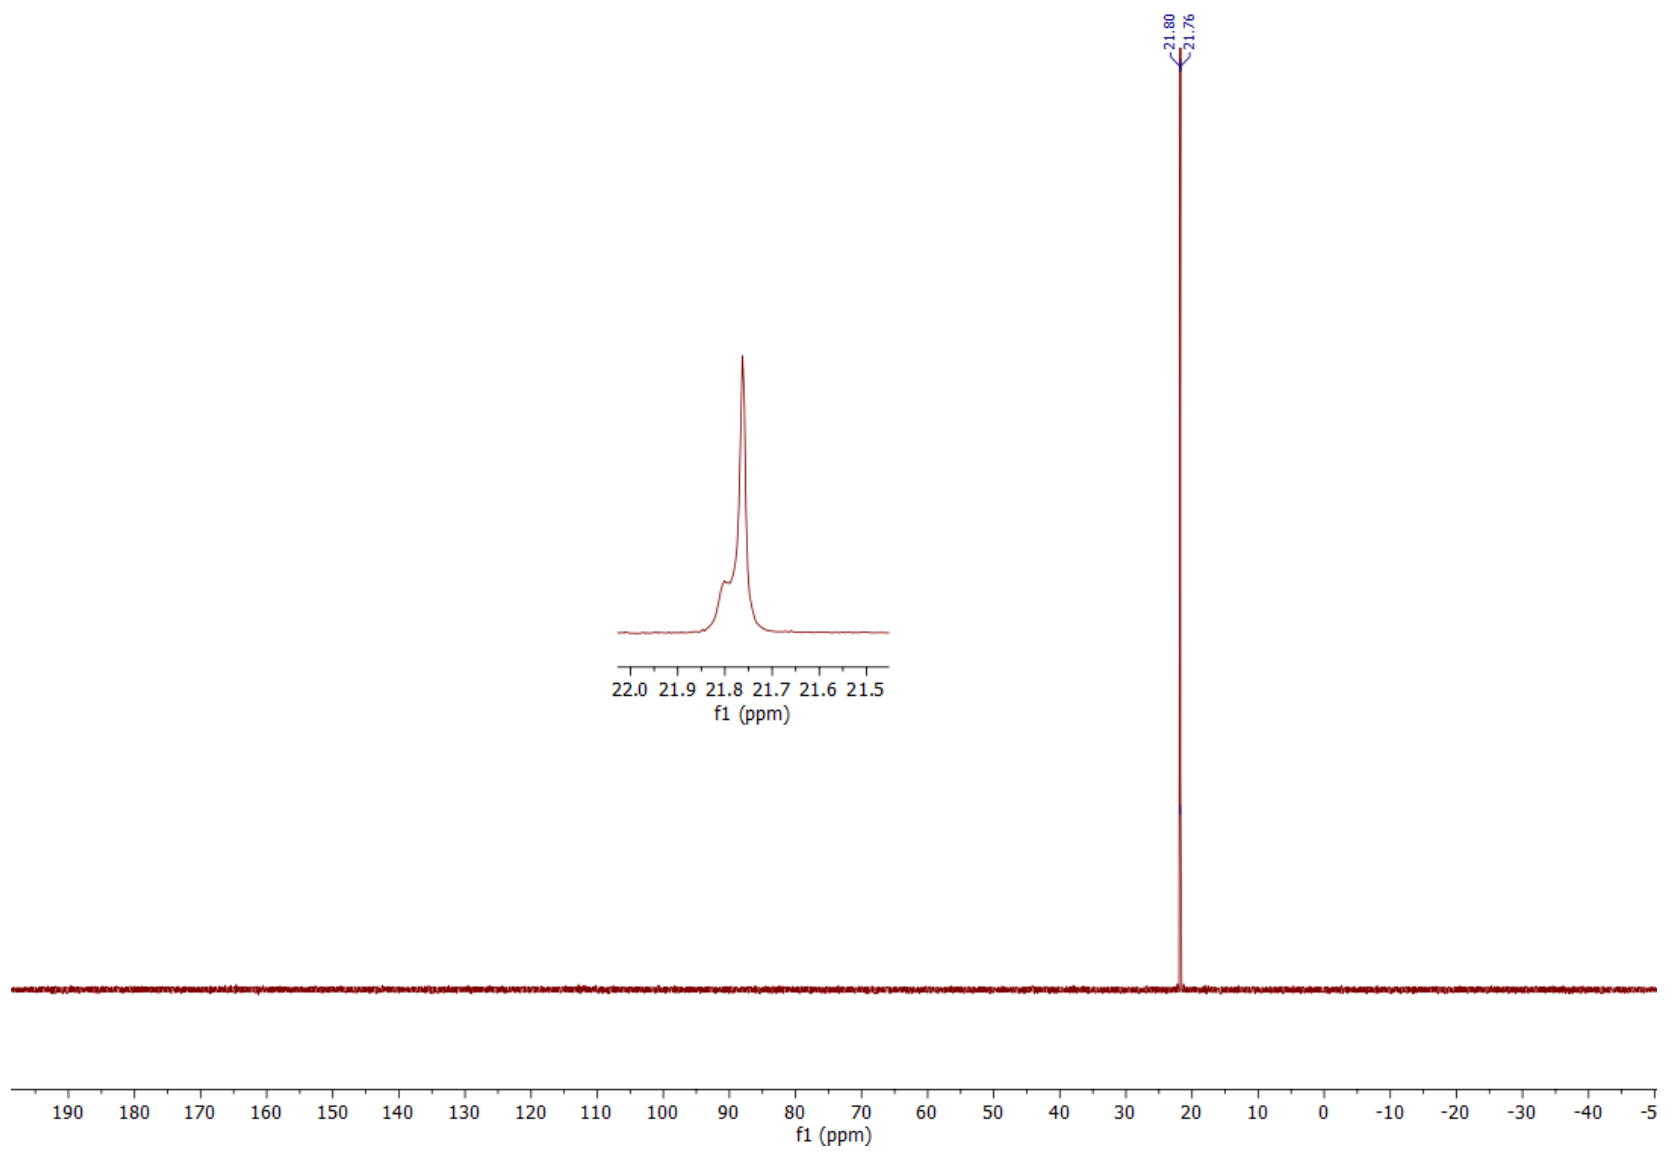

**Figure S24.**  $^{31}\text{P}$  NMR spectrum of **4b** diastereomer 2.

*Tert*-butyl 2-((diethoxyphosphoryl)(thiophene-3-carboxamido)methyl)piperidine-1-carboxylate (**4c**)

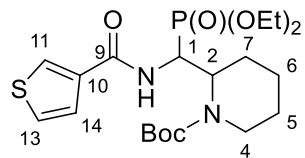

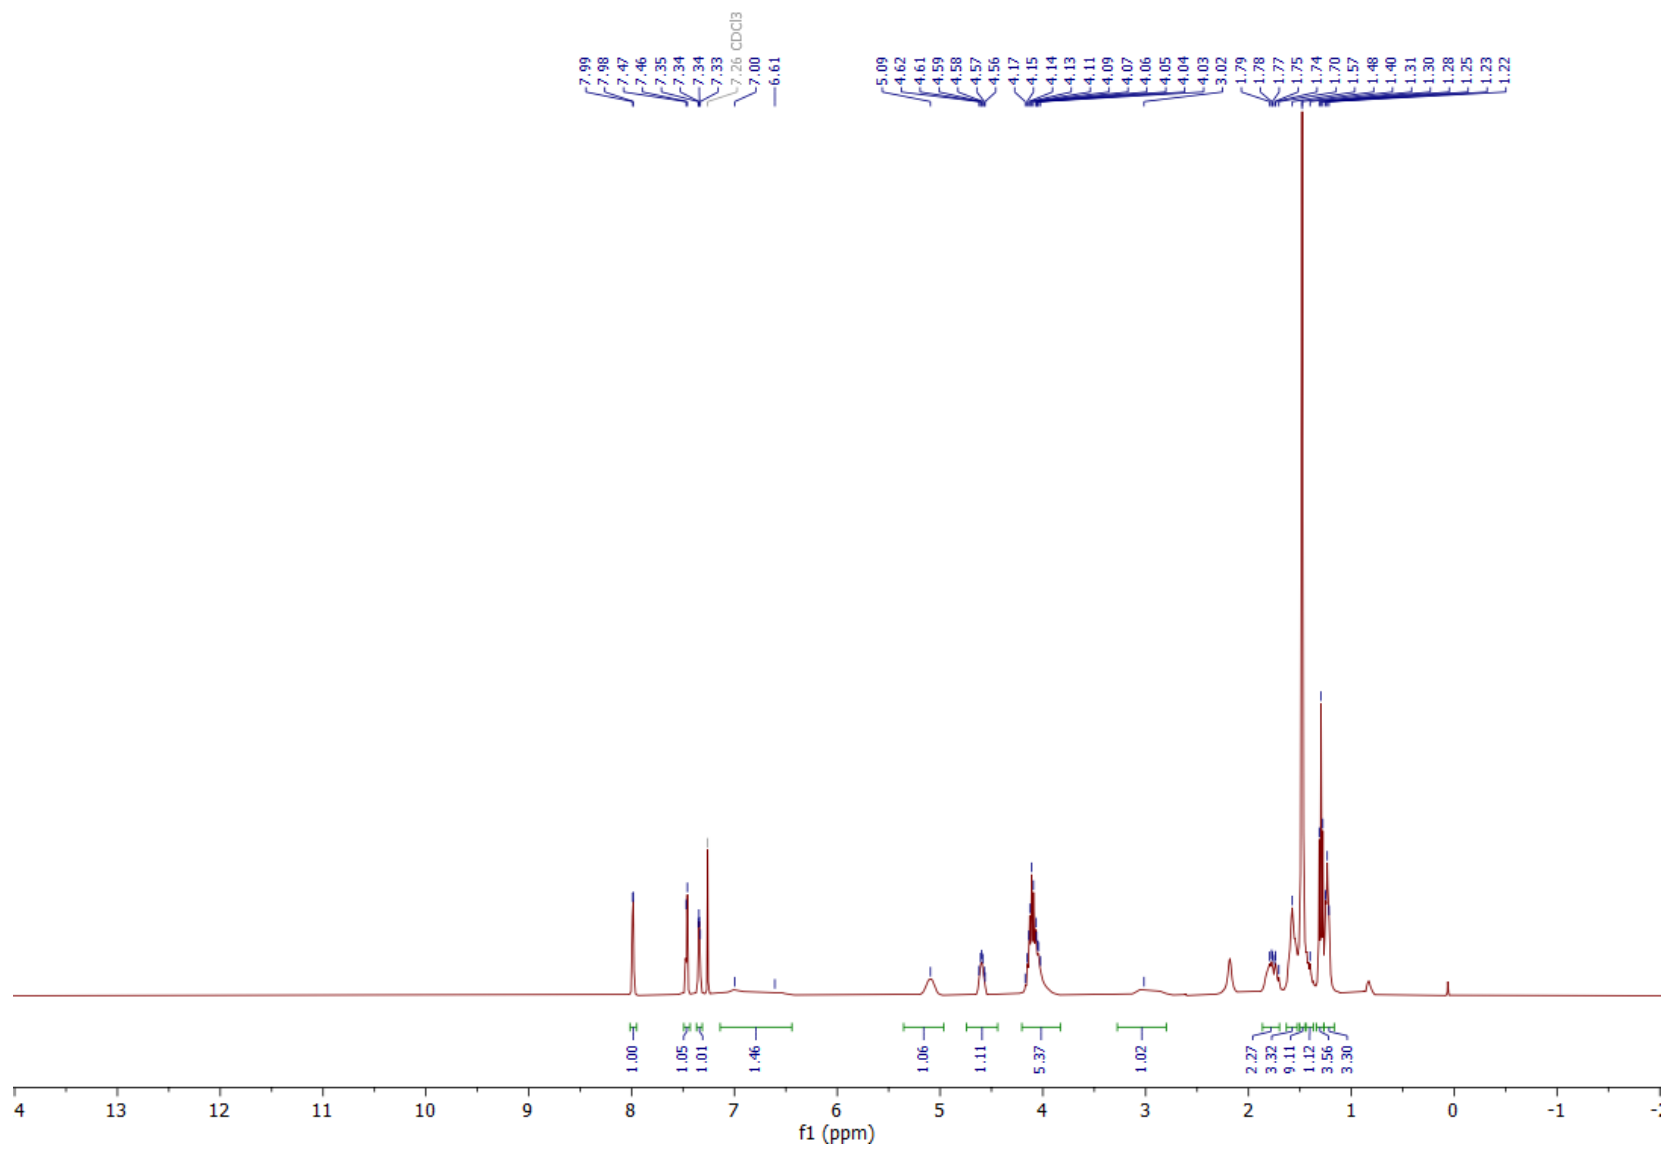

**Figure S25.** <sup>1</sup>H NMR spectrum of **4c** diastereomer 1.

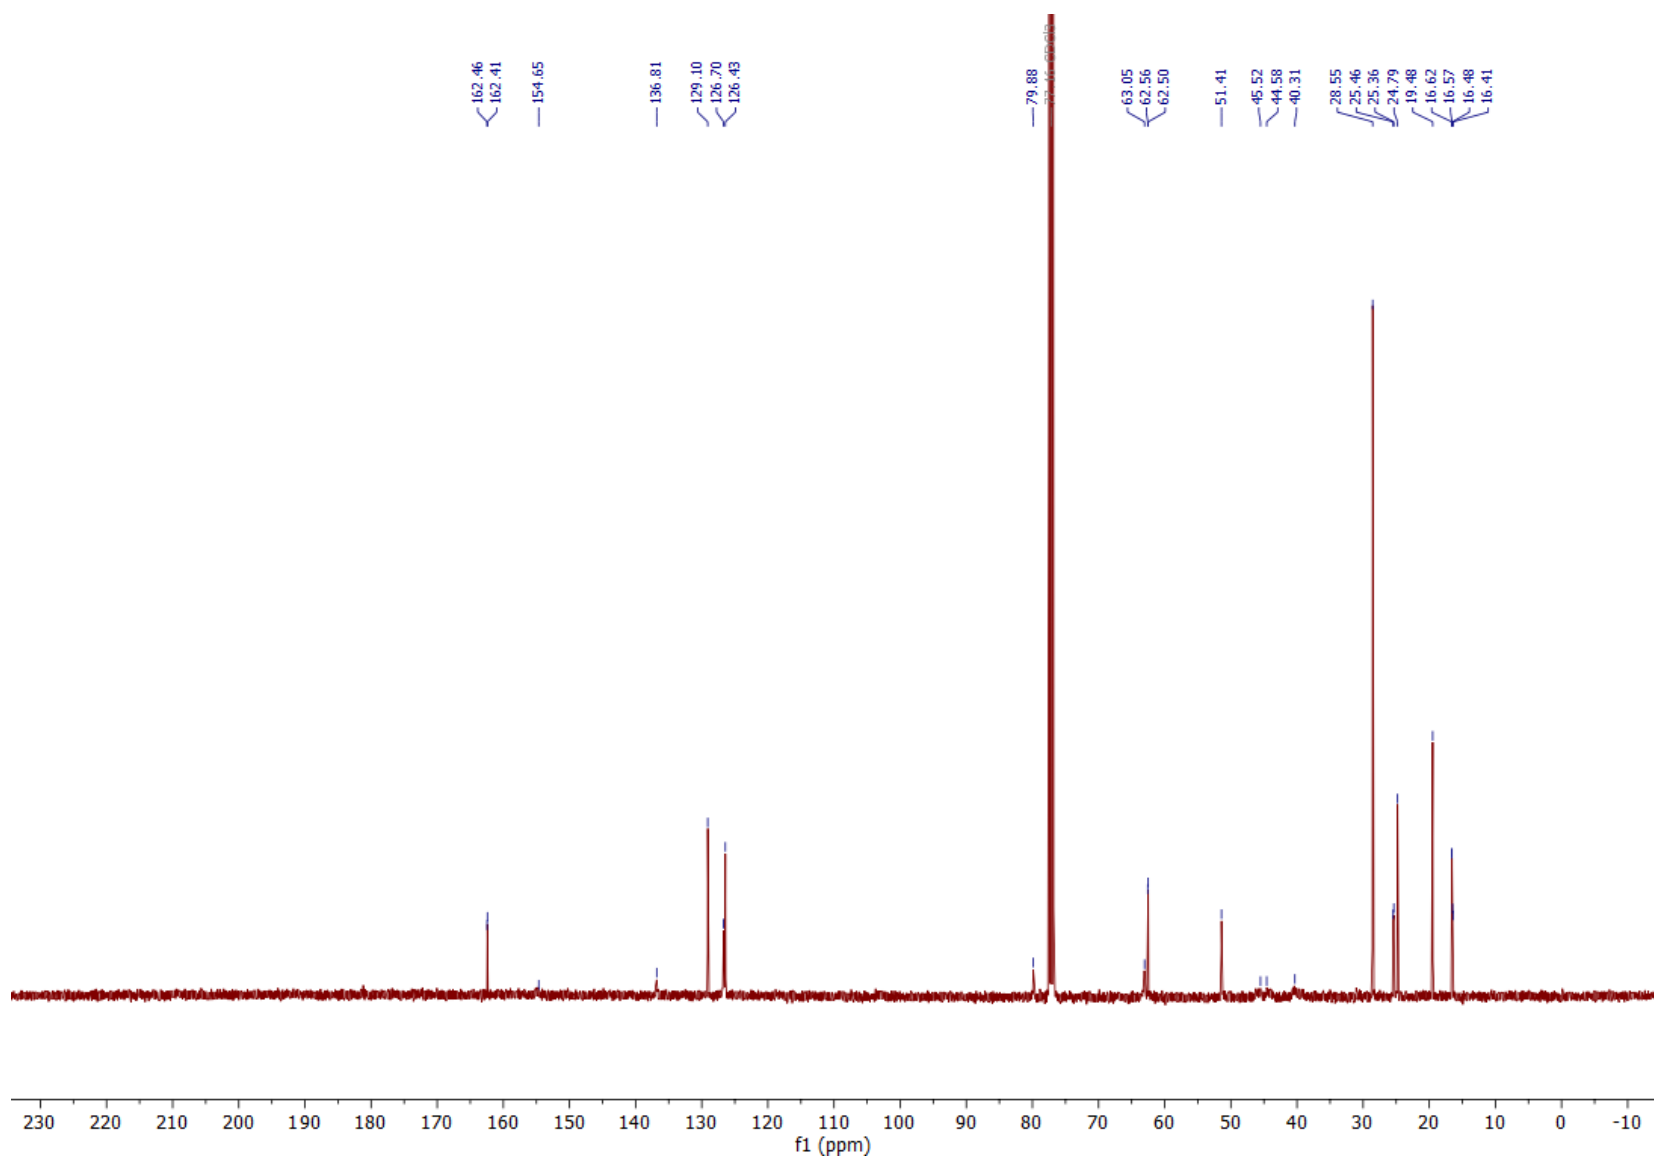

**Figure S26.** <sup>13</sup>C NMR spectrum of **4c** diastereomer 1.

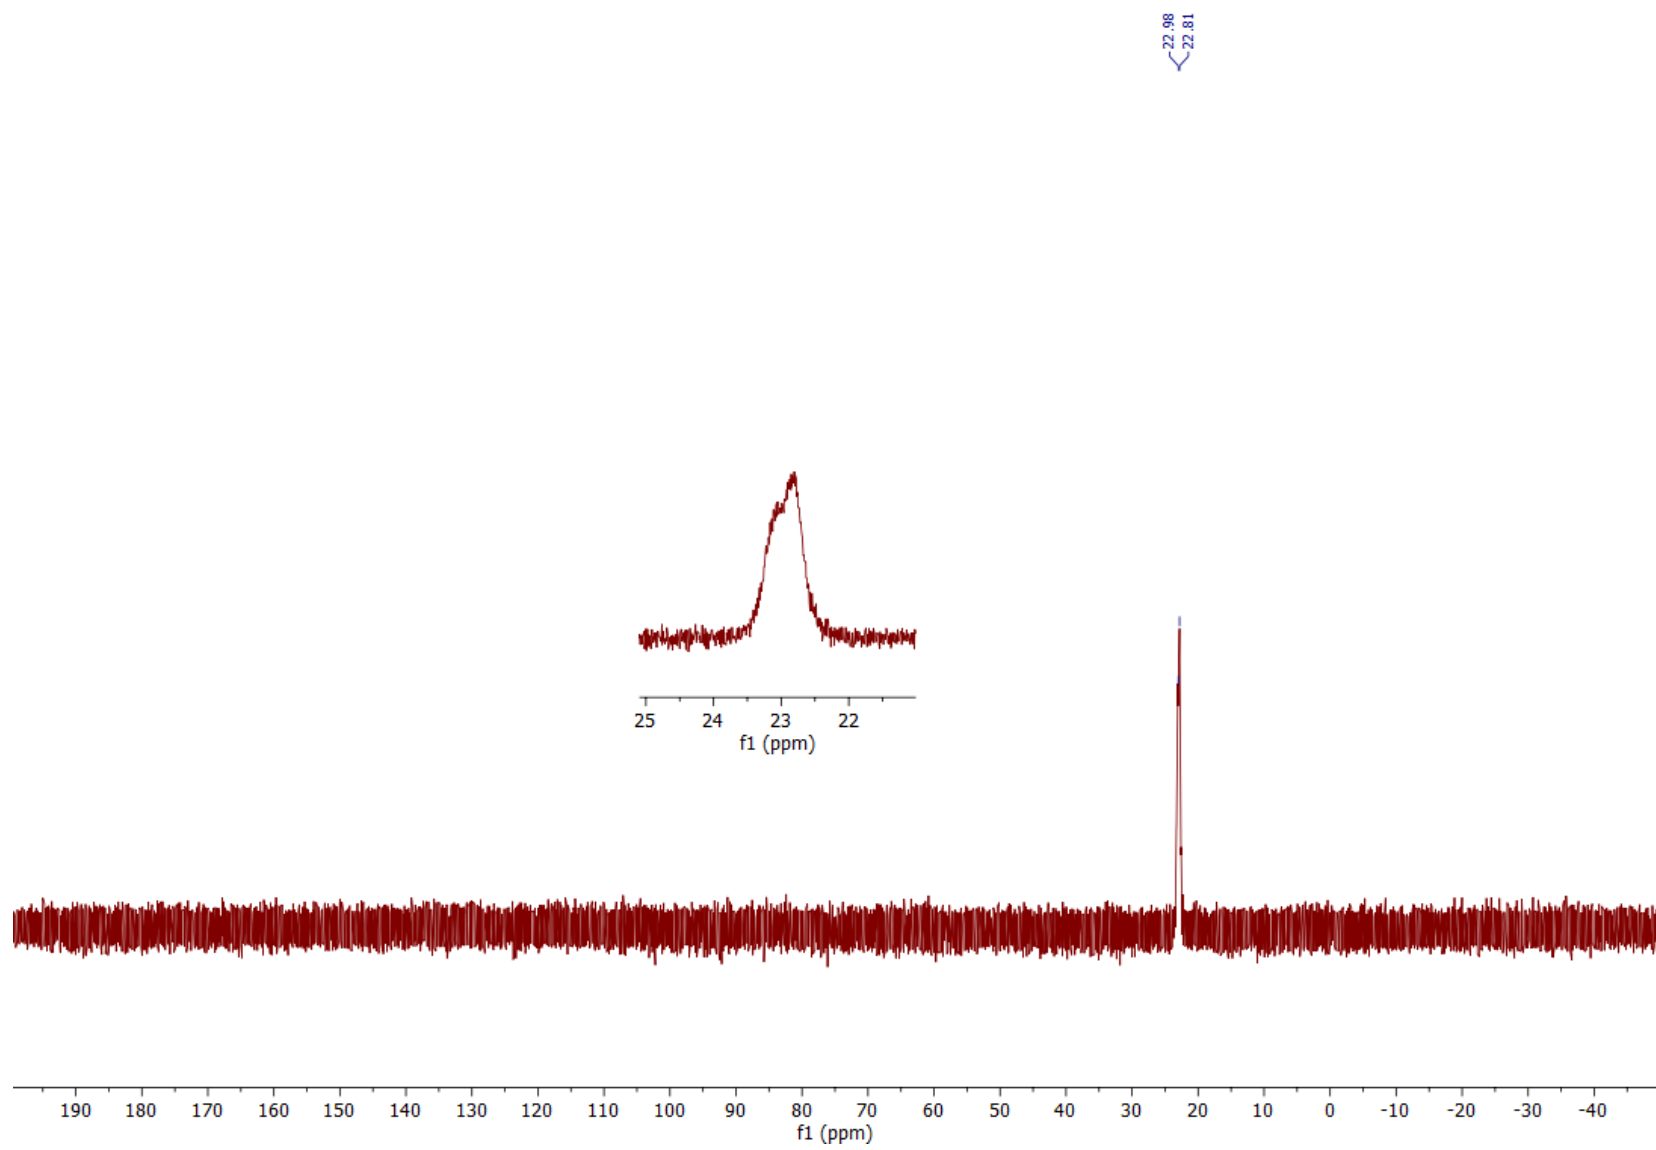

**Figure S27.**  $^{31}\text{P}$  NMR spectrum of **4c** diastereomer 1.

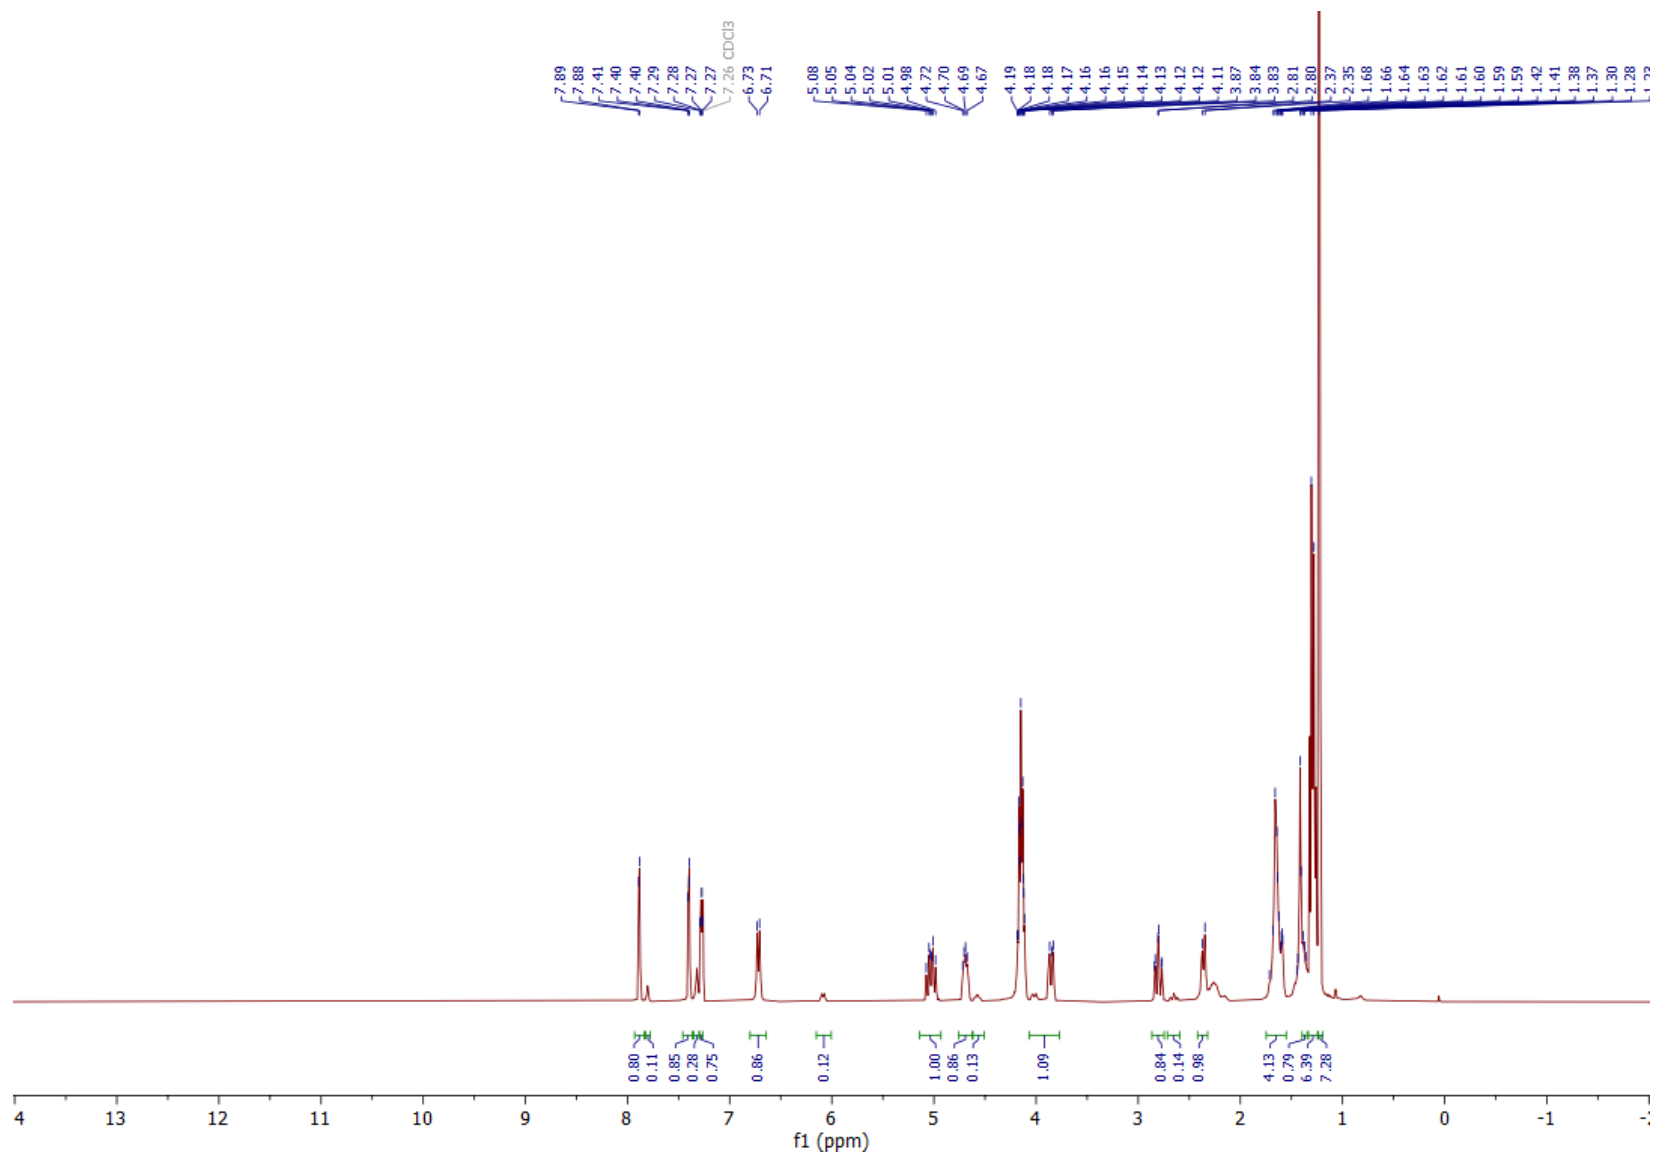

**Figure S28.**  $^1\text{H}$  NMR spectrum of **4c** diastereomer 2.

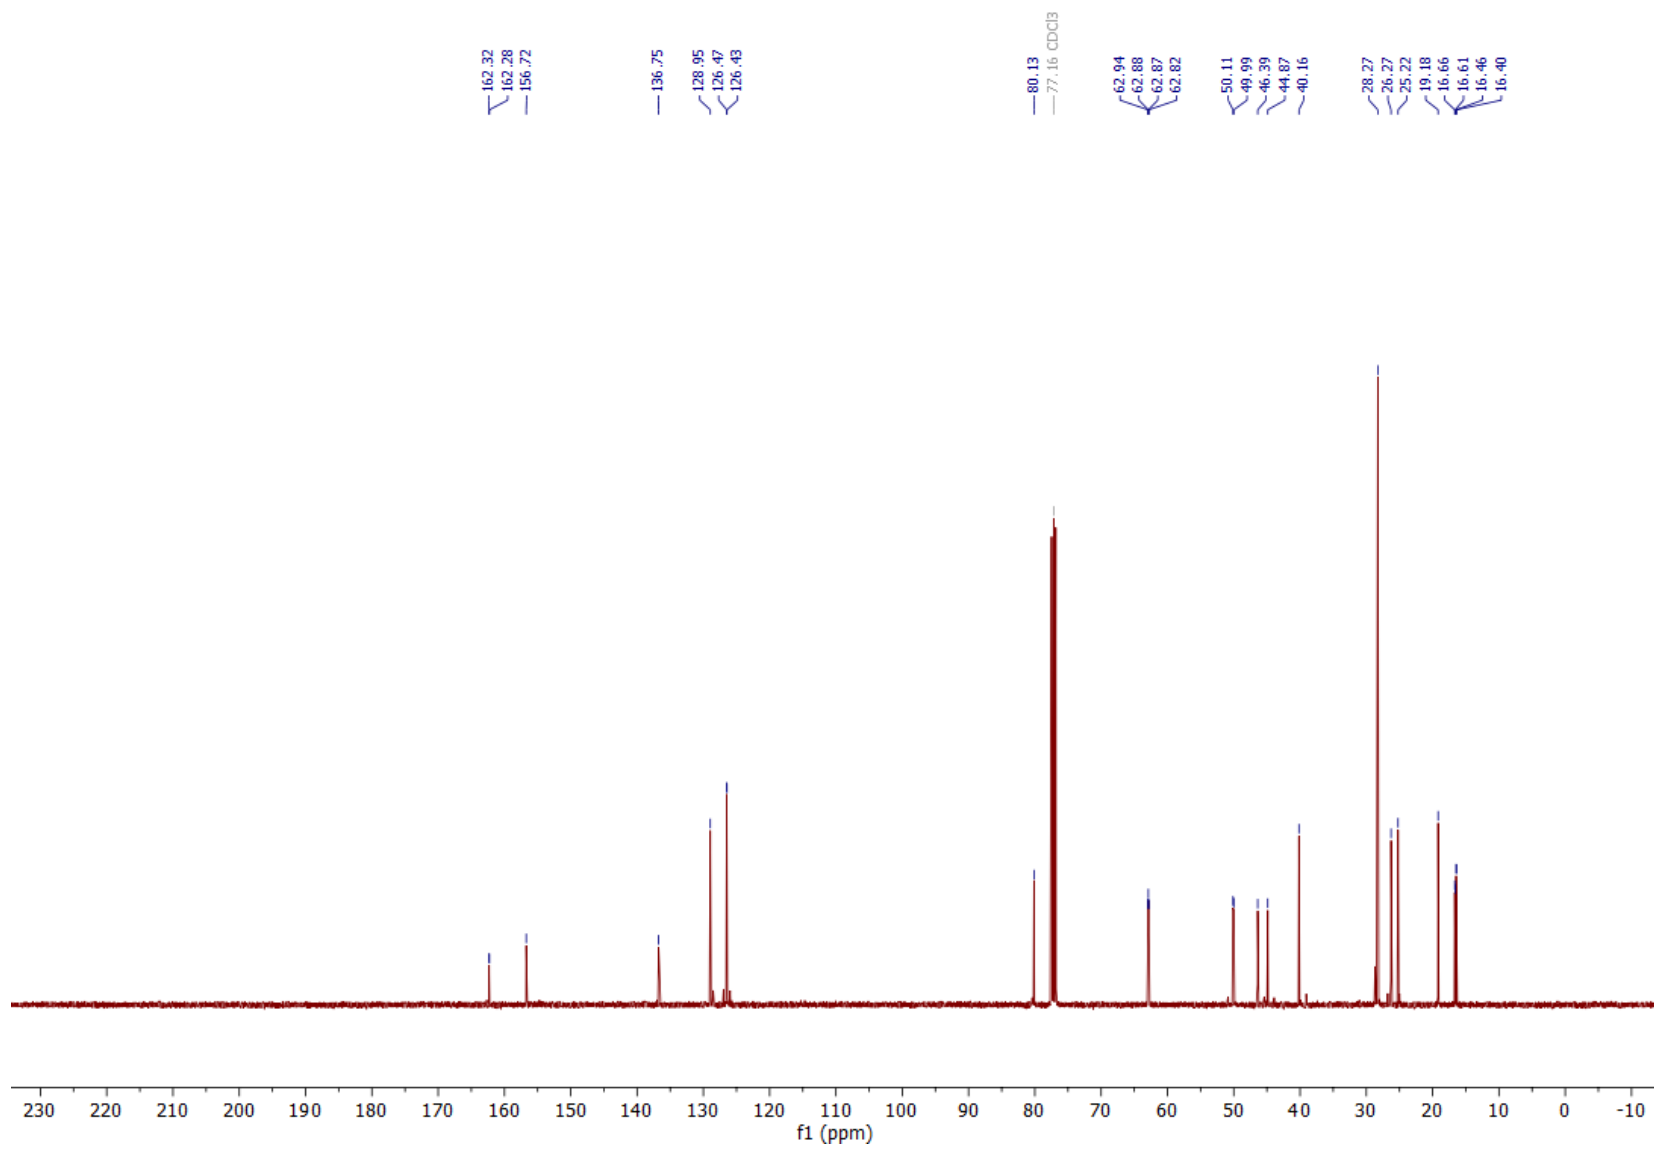

**Figure S29.** <sup>13</sup>C NMR spectrum of **4c** diastereomer 2.



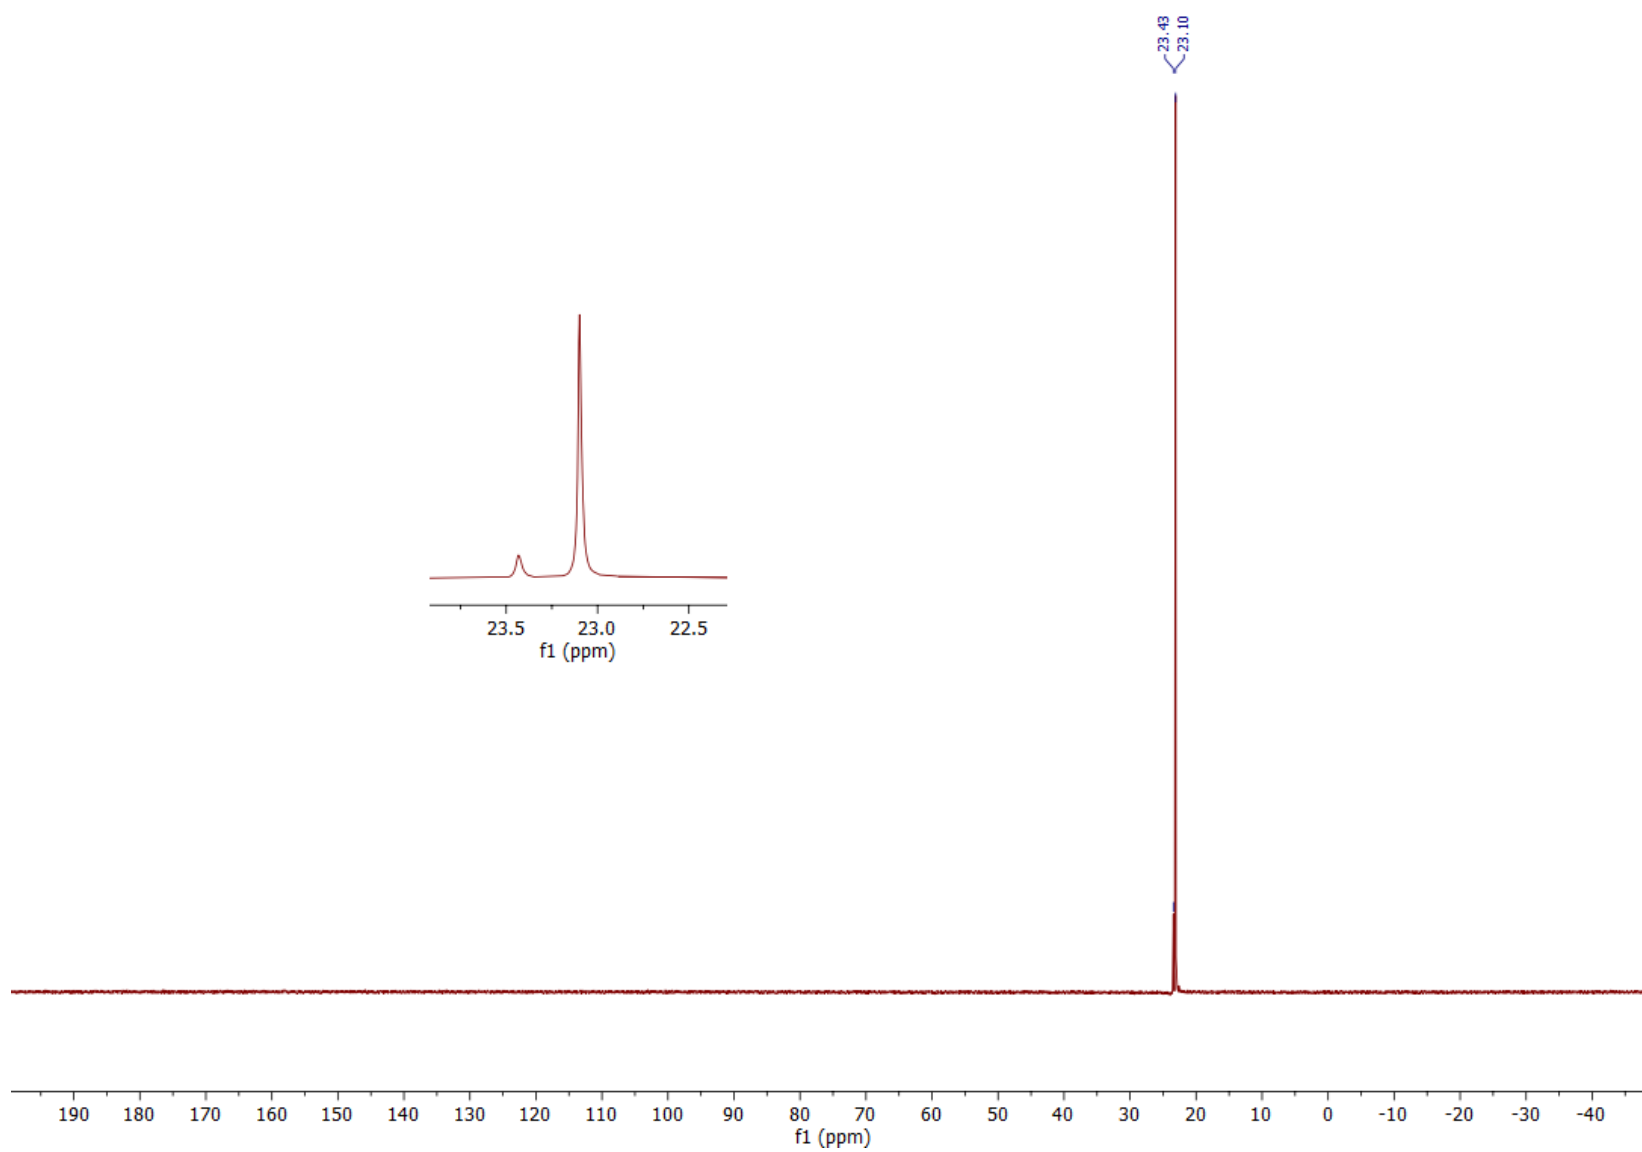

**Figure S30.**  $^{31}\text{P}$  NMR spectrum of **4c** diastereomer 2.

*Tert*-butyl 2-((diethoxyphosphoryl)(4,5,6,7-tetrahydrobenzo[*b*]thiophene-2-carboxamido)methyl)piperidine-1-carboxylate (**4d**)

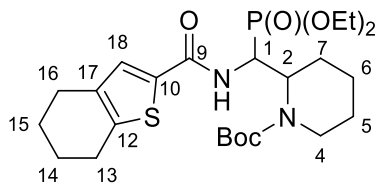

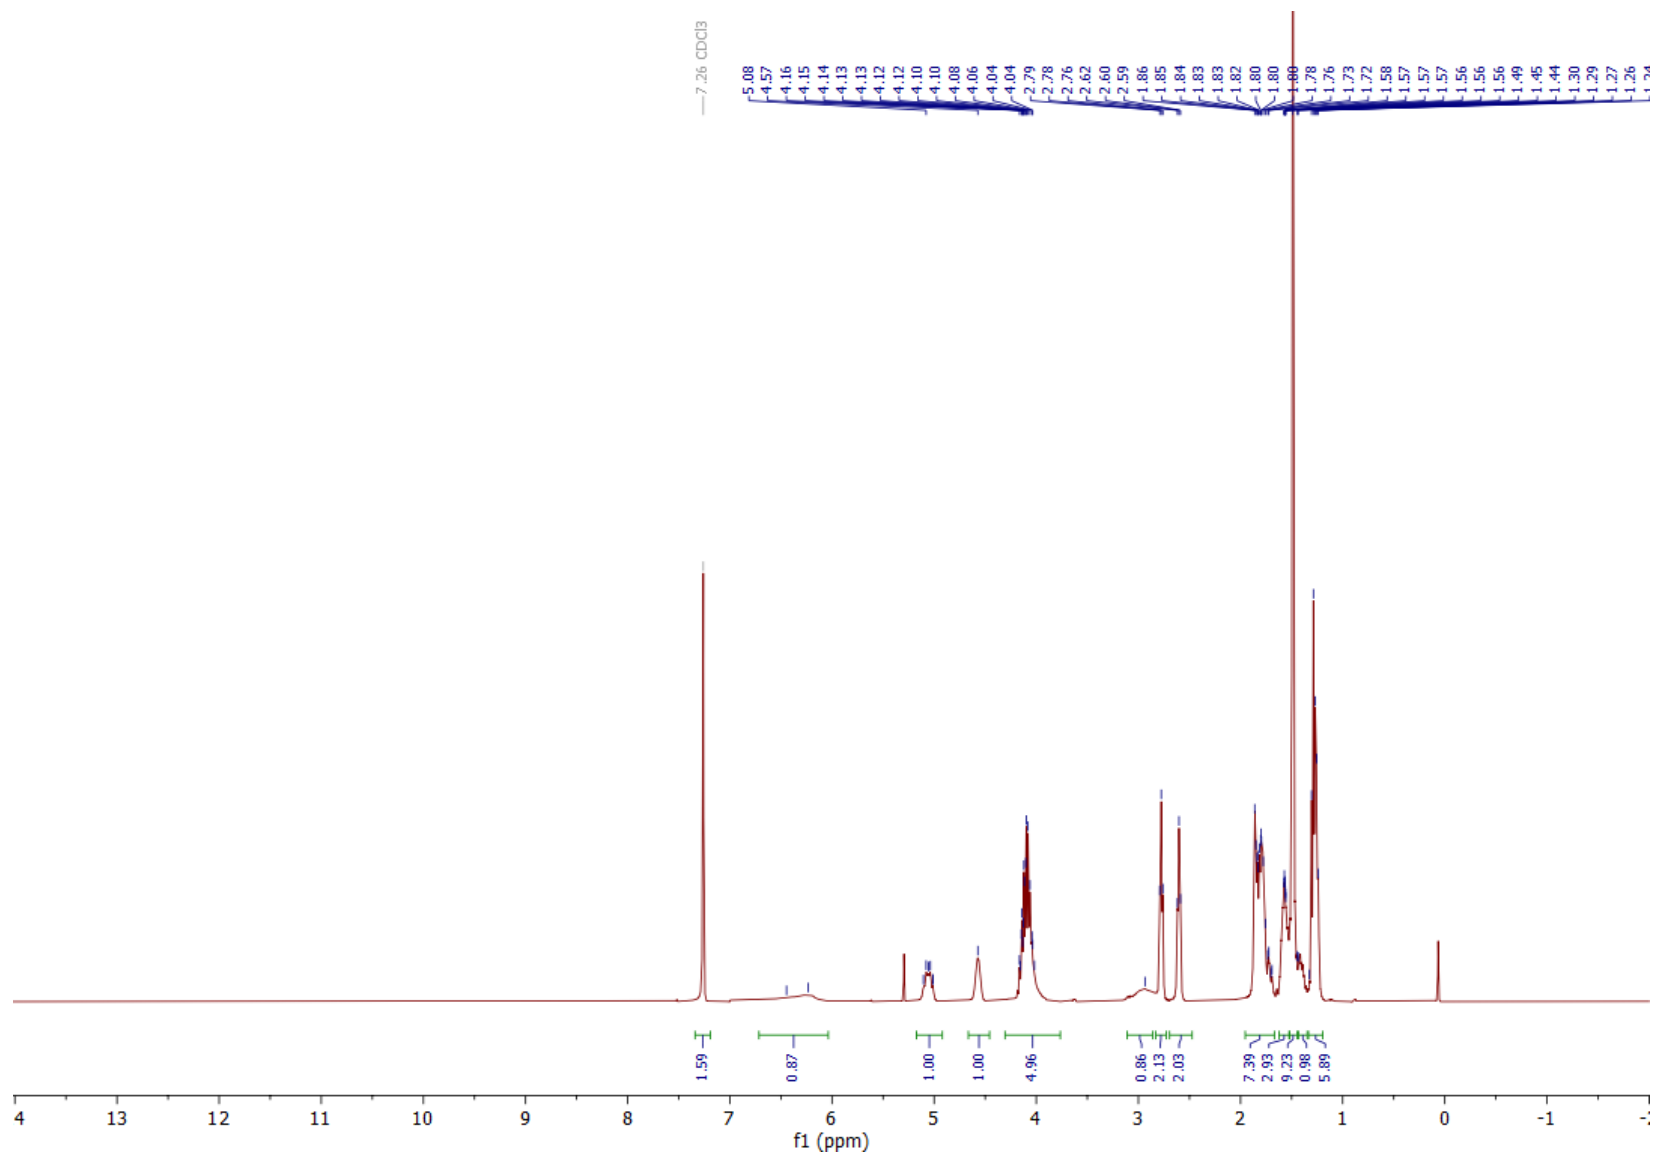

**Figure S31.**  $^1\text{H}$  NMR spectrum of **4d** diastereomer 1.

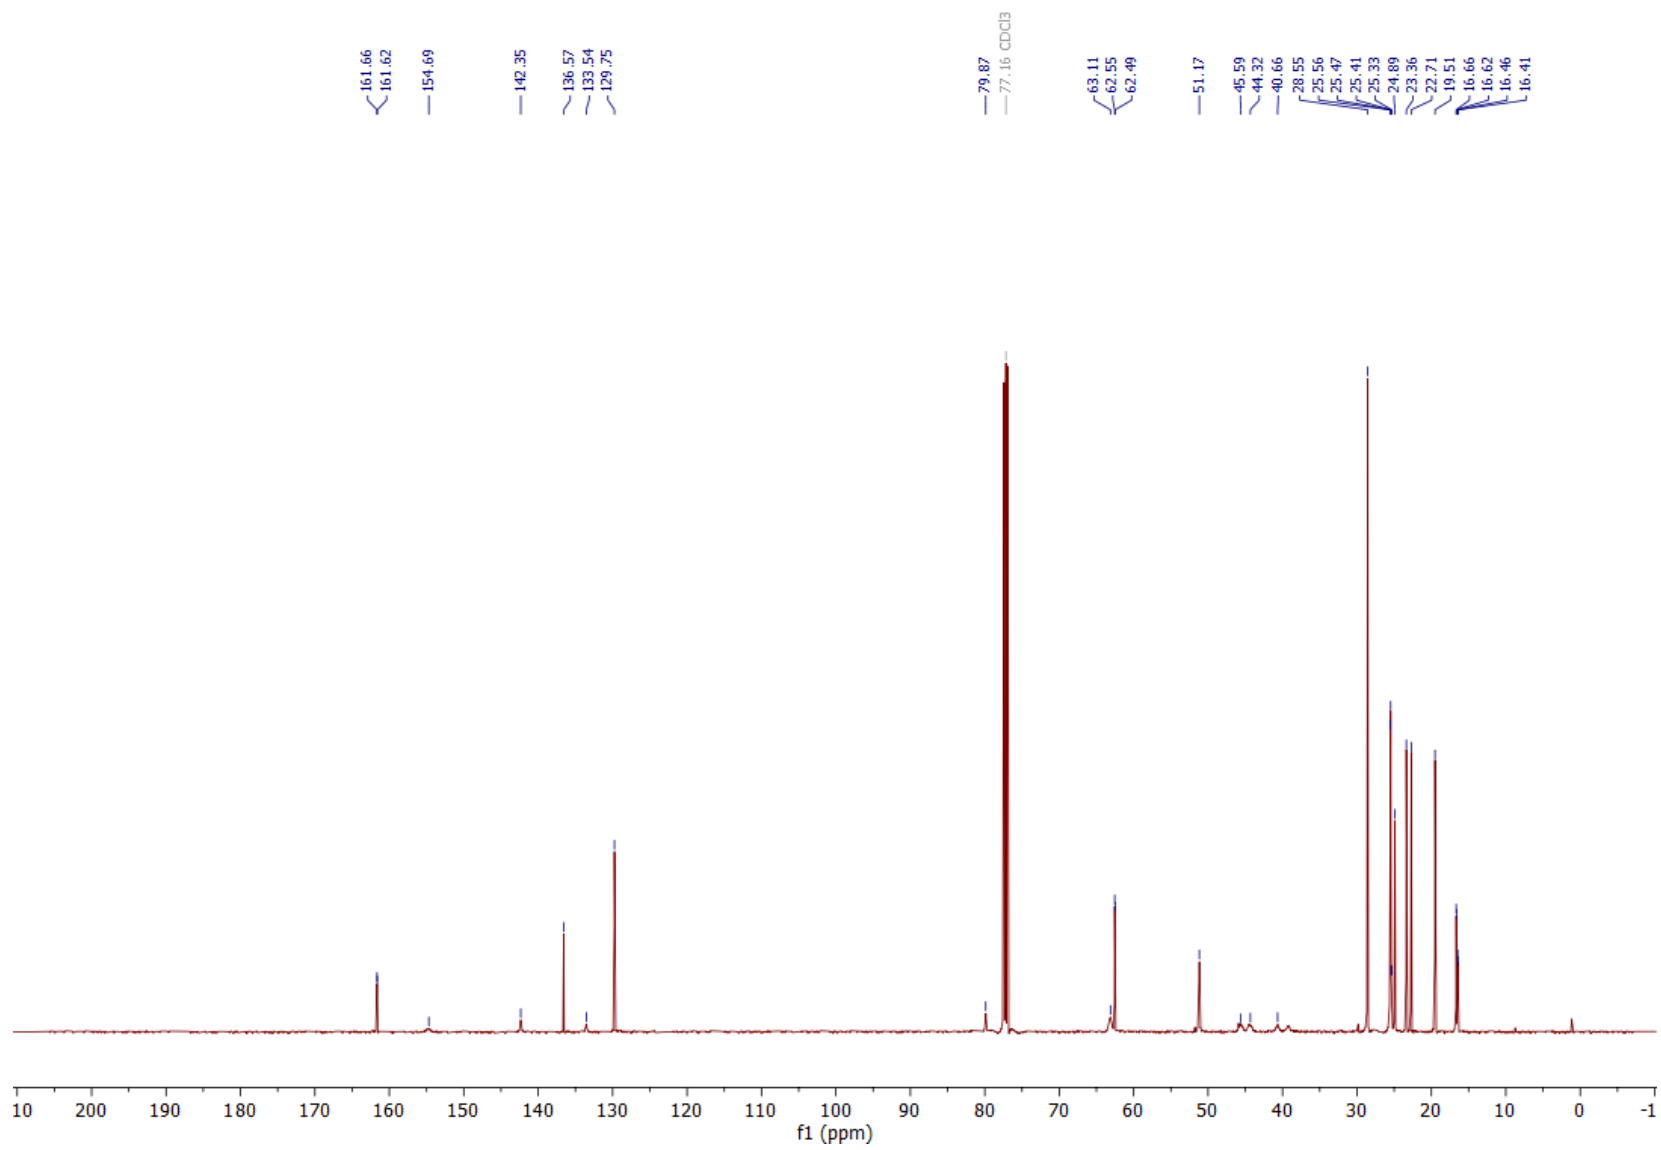

**Figure S32.**  $^{13}\text{C}$  NMR spectrum of **4d** diastereomer 1.

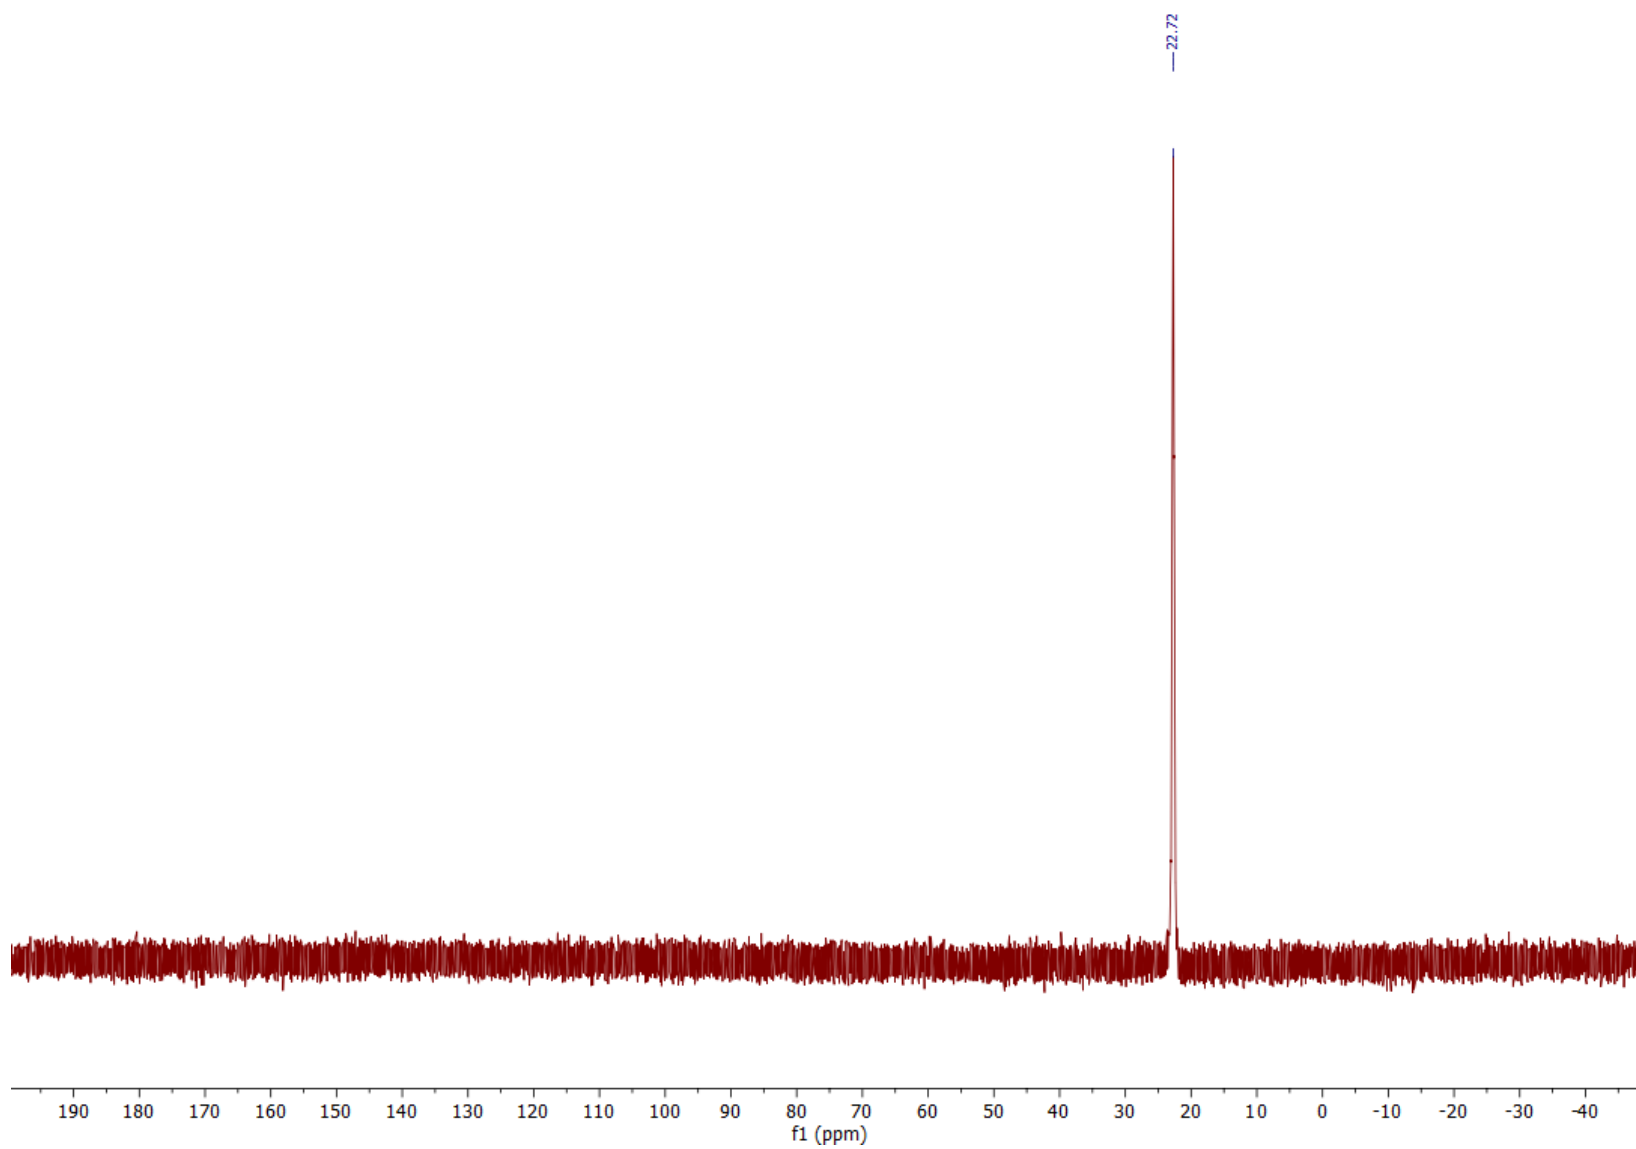

**Figure S33.**  $^{31}\text{P}$  NMR spectrum of **4d** diastereomer 1.

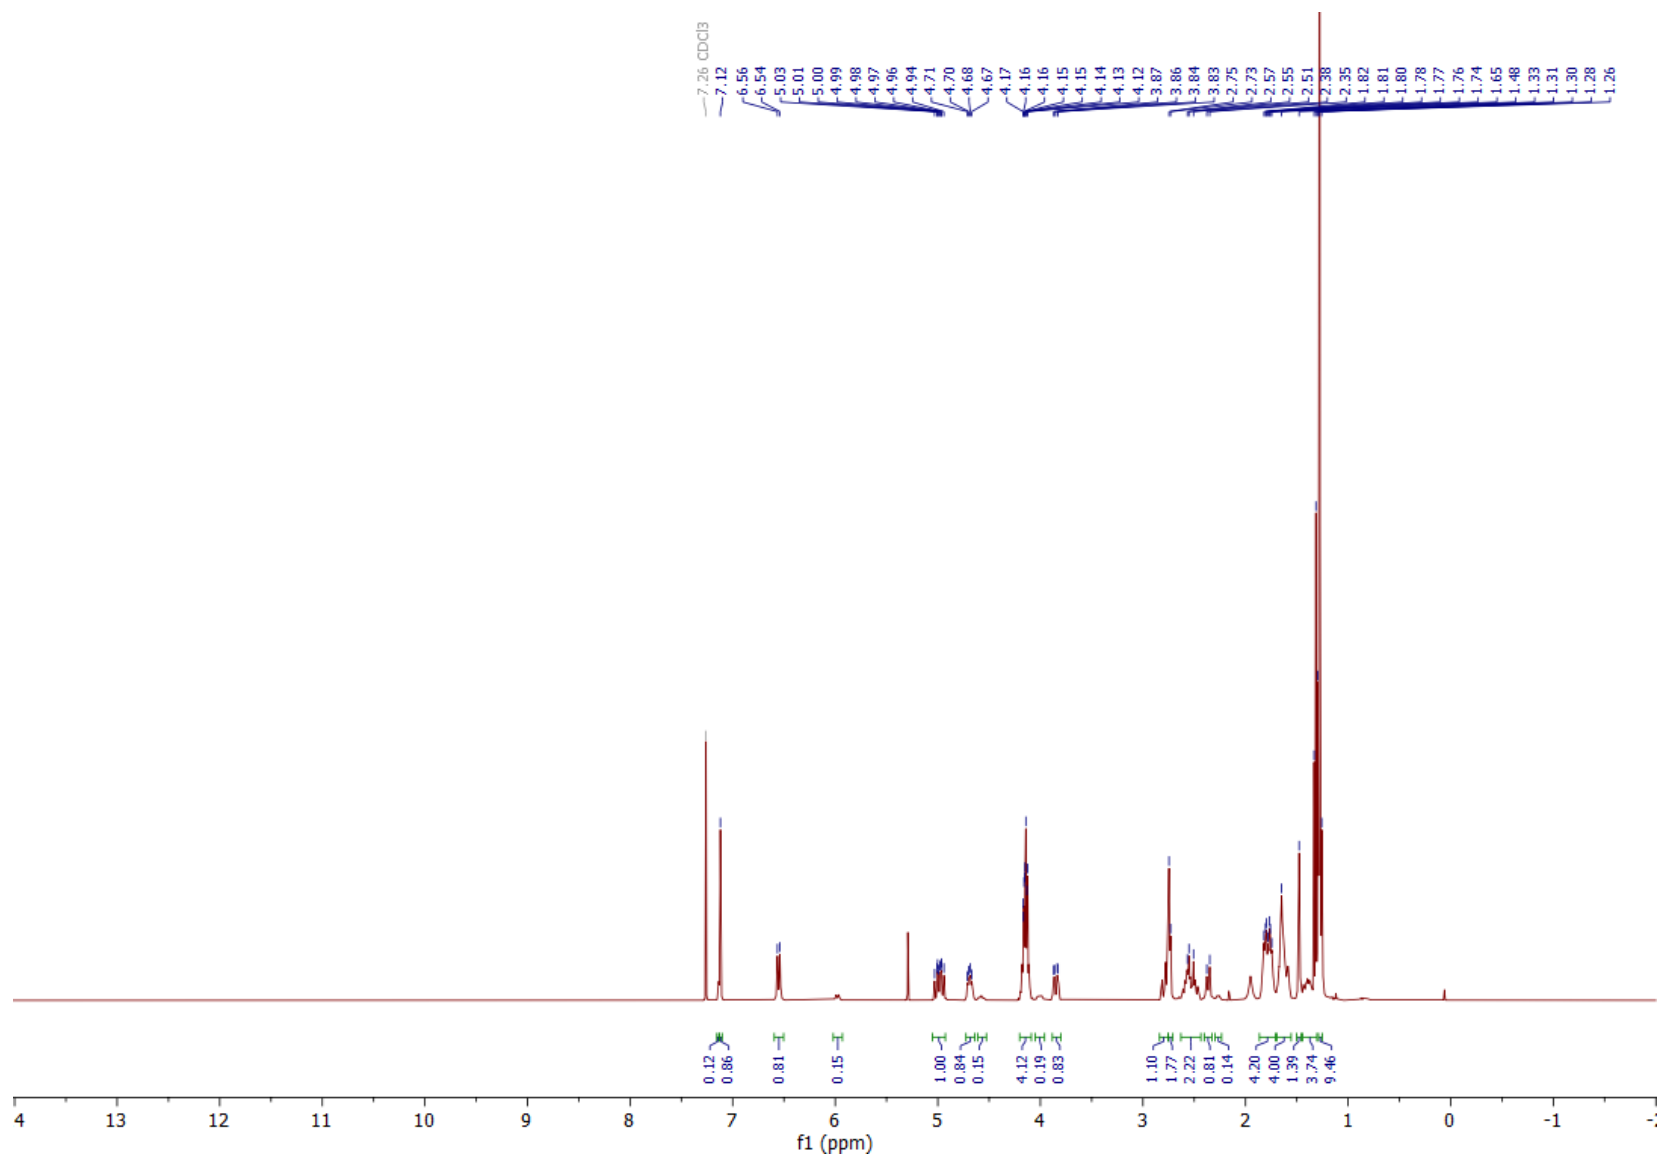

Figure S34. <sup>1</sup>H NMR spectrum of **4d** diastereomer 2.

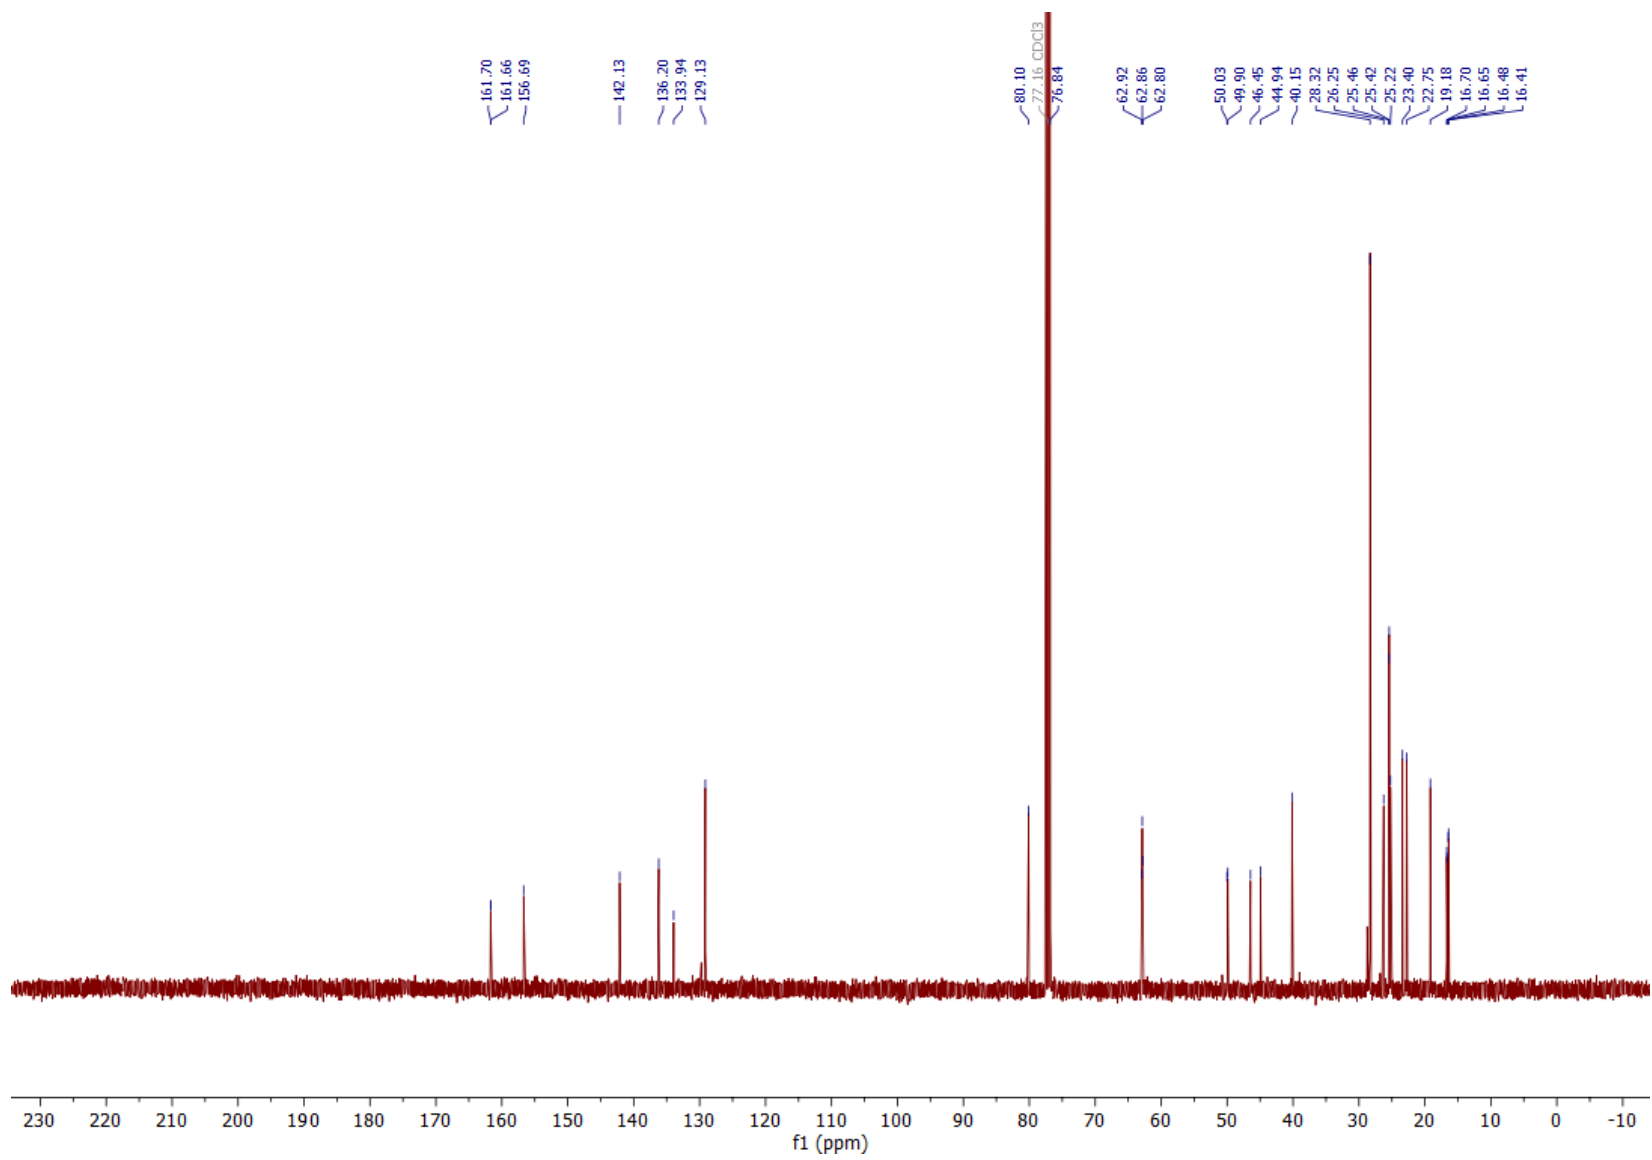

Figure S35. <sup>13</sup>C NMR spectrum of **4d** diastereomer 2.

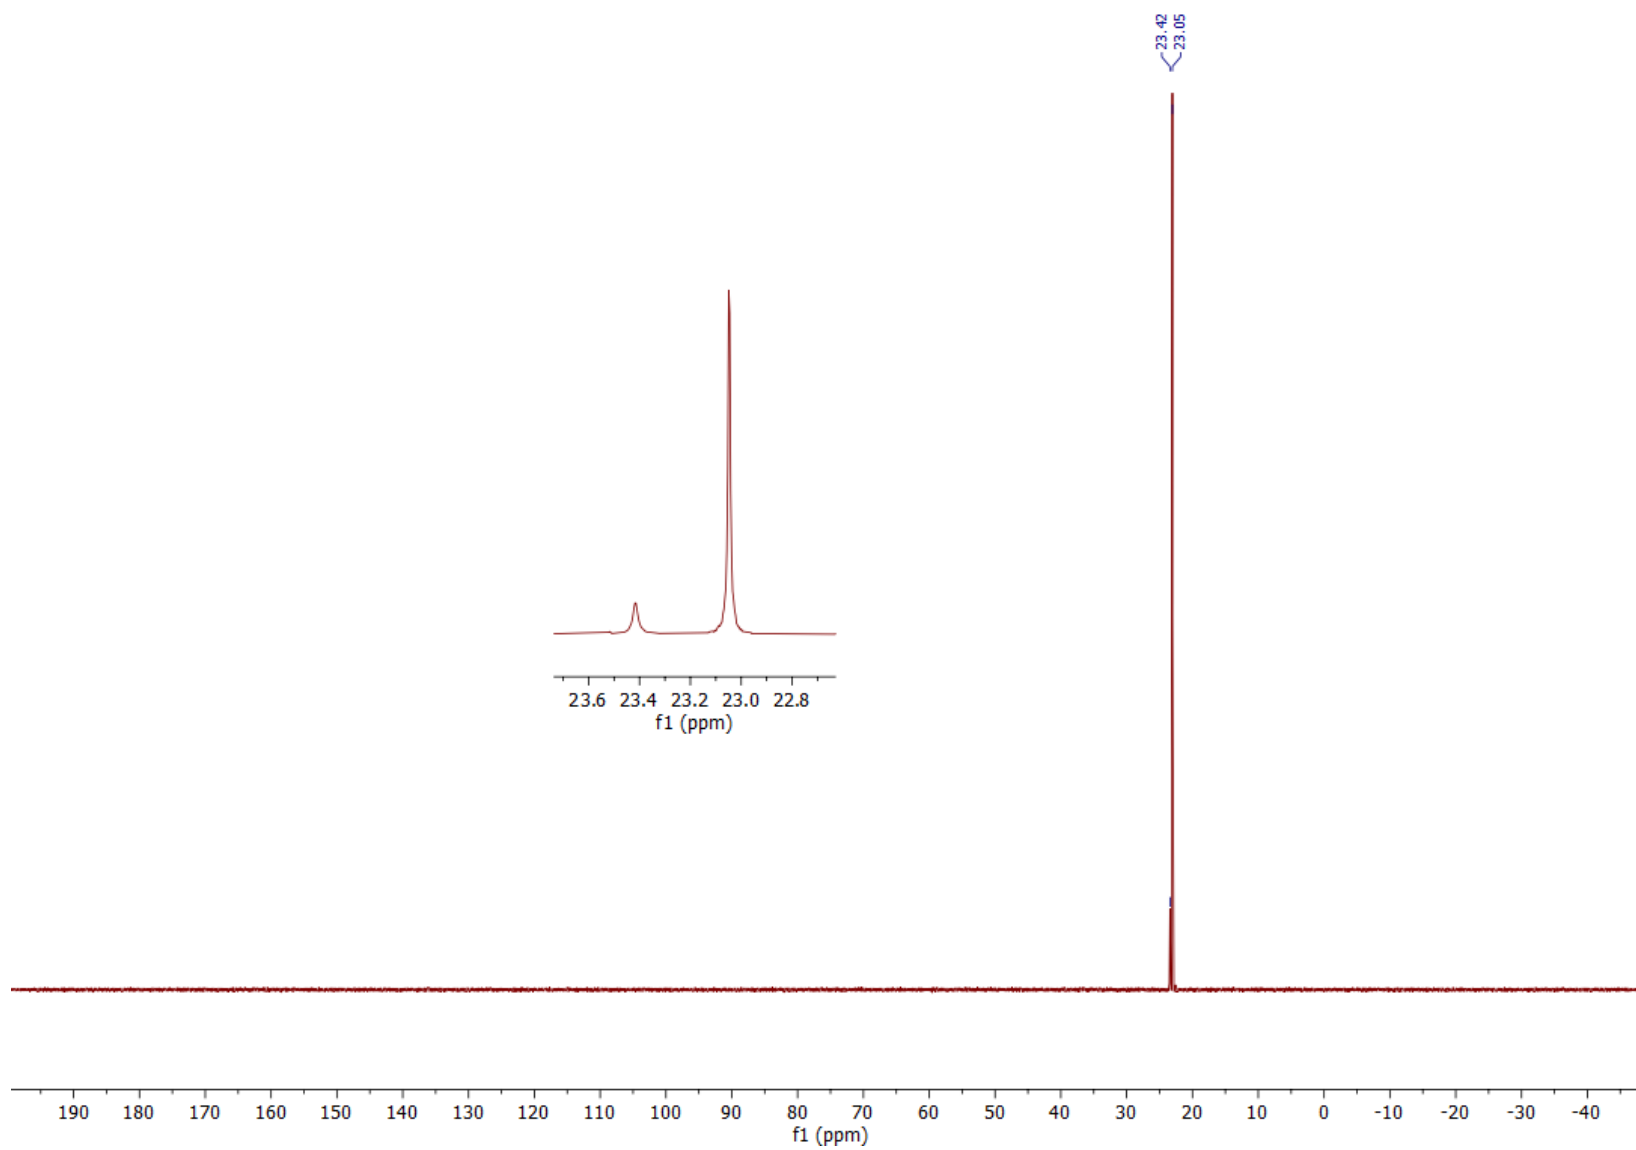

**Figure S36.**  $^{31}\text{P}$  NMR spectrum of **4d** diastereomer 2.



*Tert*-butyl 2-((diethoxyphosphoryl)(4,5,6,7-tetrahydrobenzo[*b*]thiophene-3-carboxamido)methyl)piperidine-1-carboxylate (**4e**)

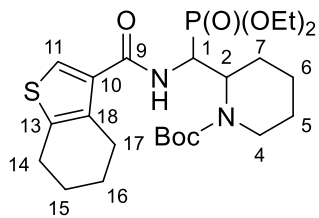

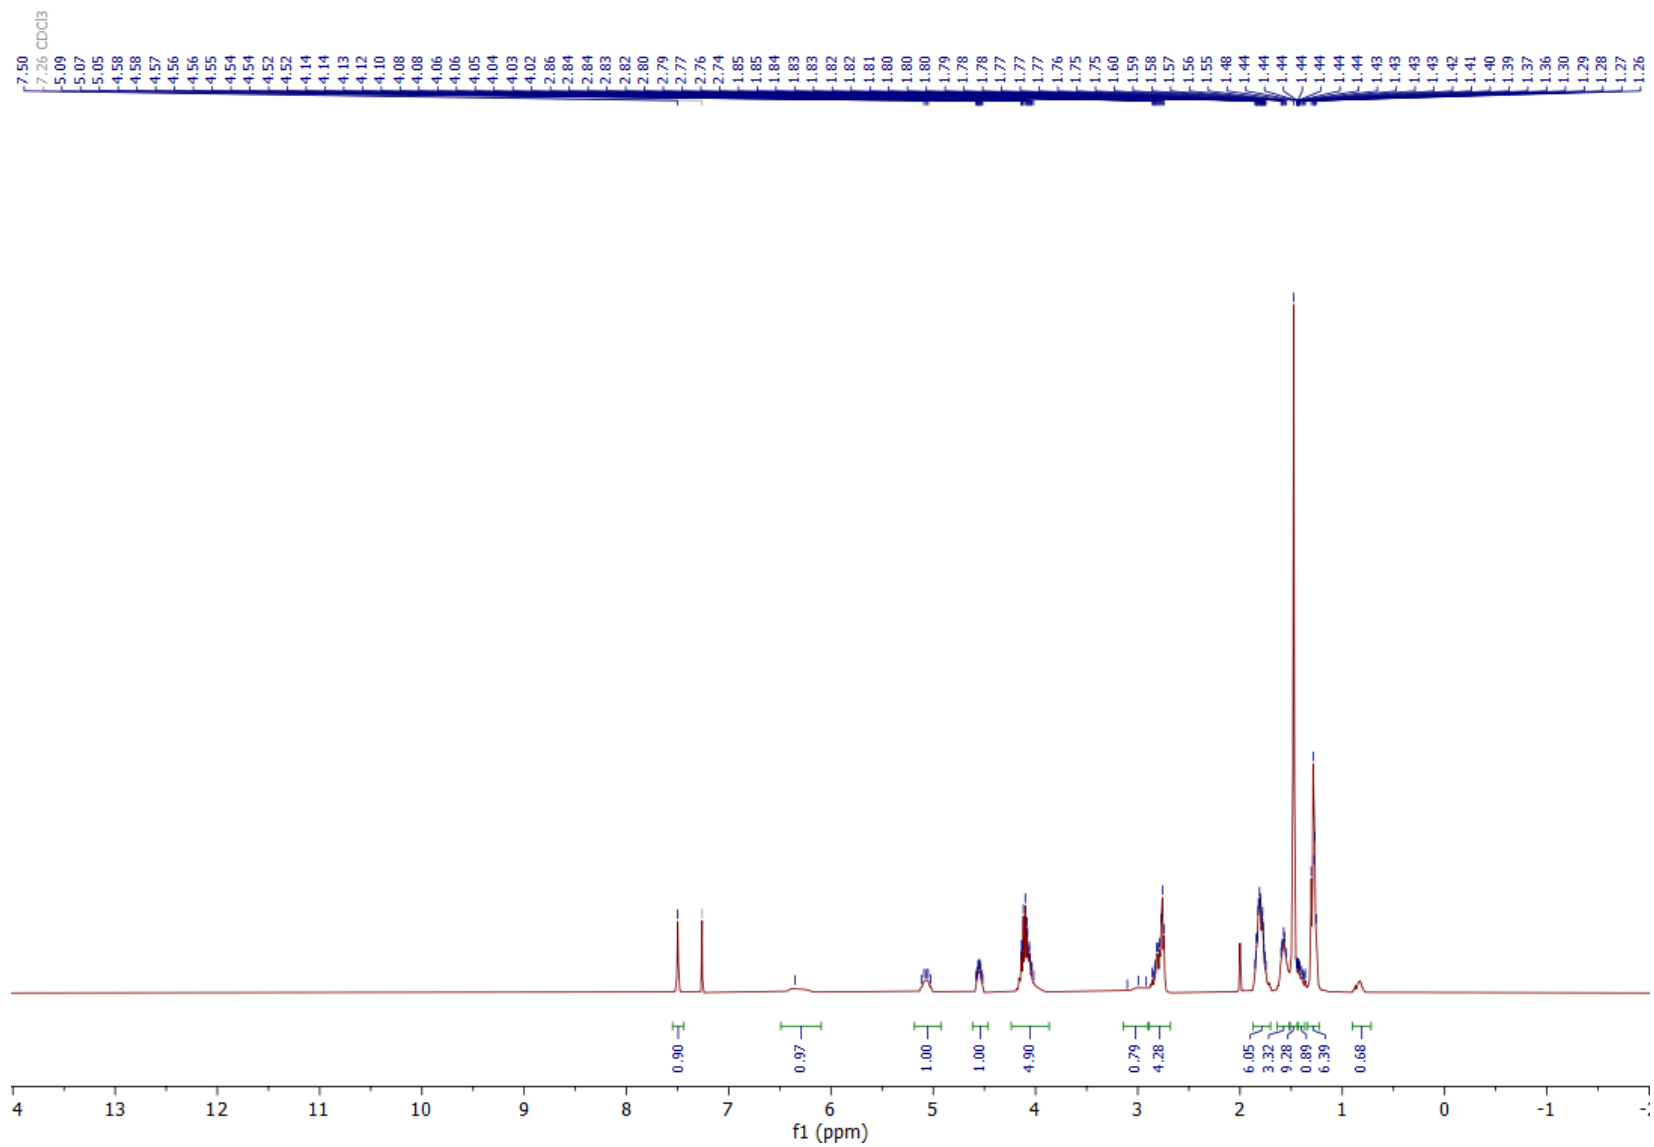

Figure S37. <sup>1</sup>H NMR spectrum of **4e** diastereomer 1.

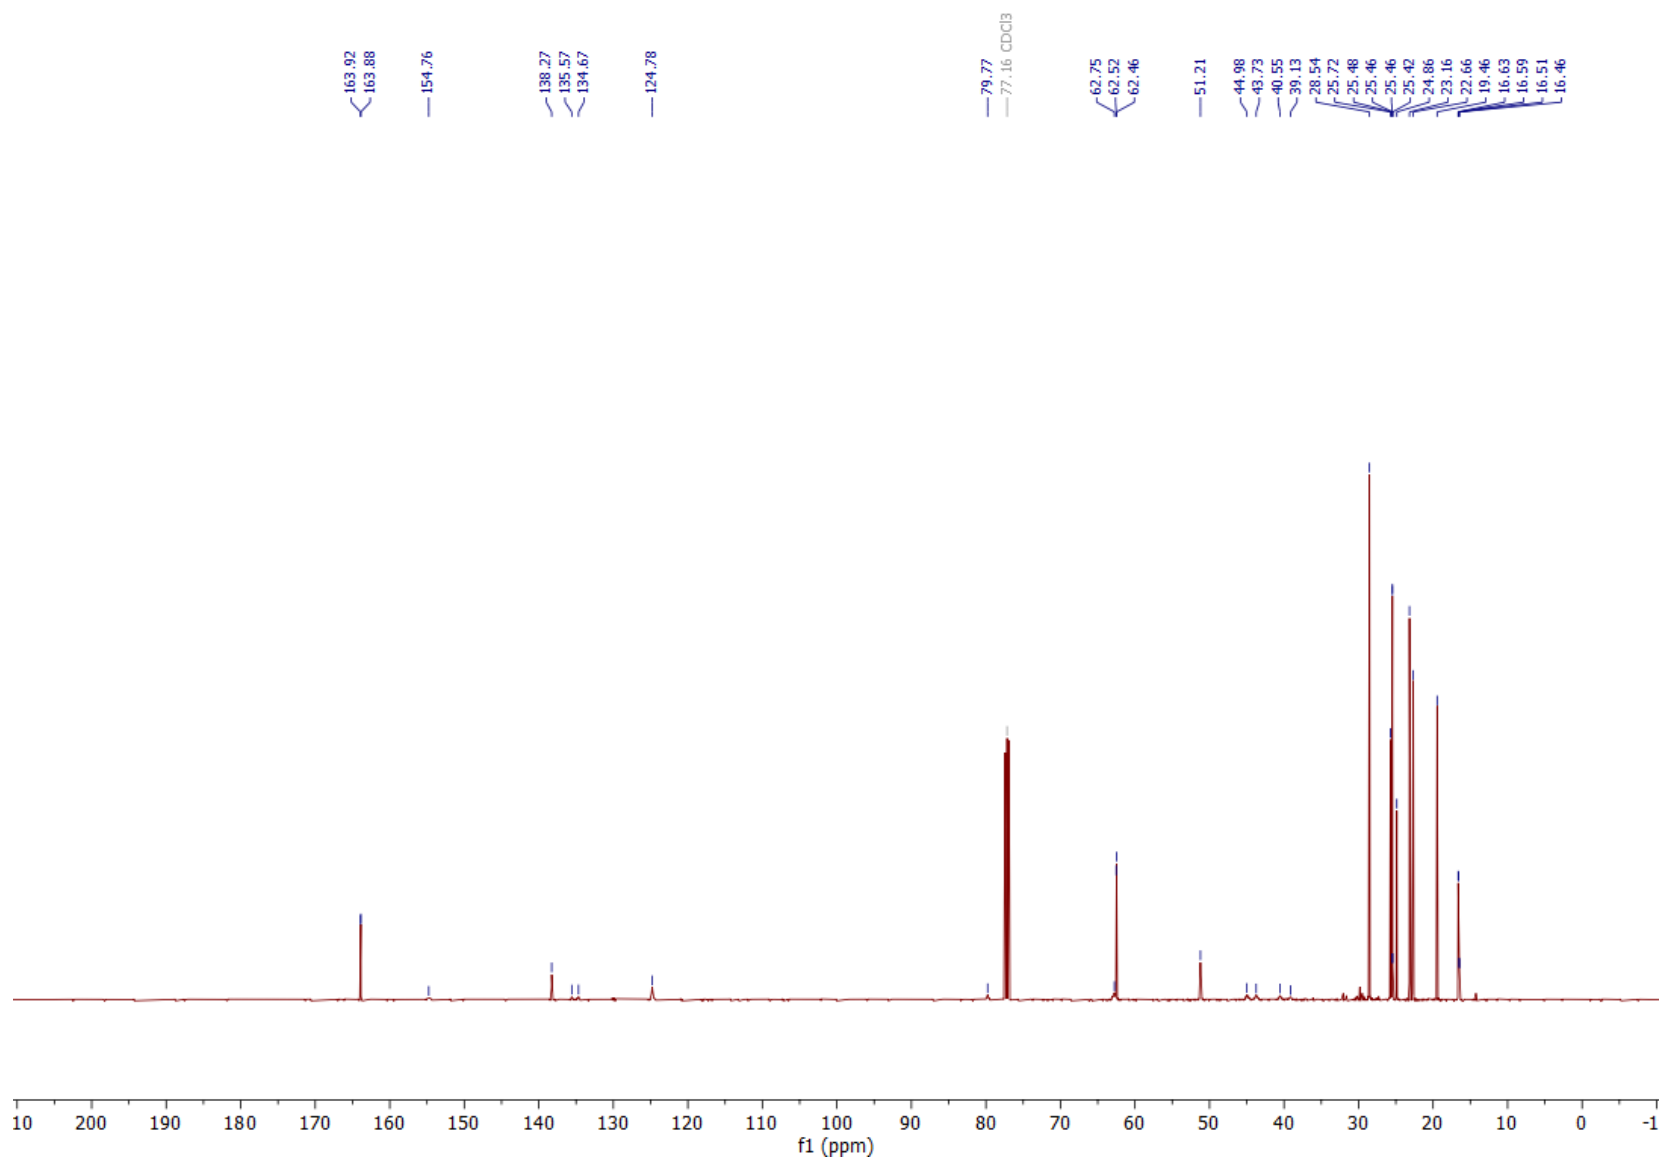

**Figure S38.** <sup>13</sup>C NMR spectrum of **4e** diastereomer 1.

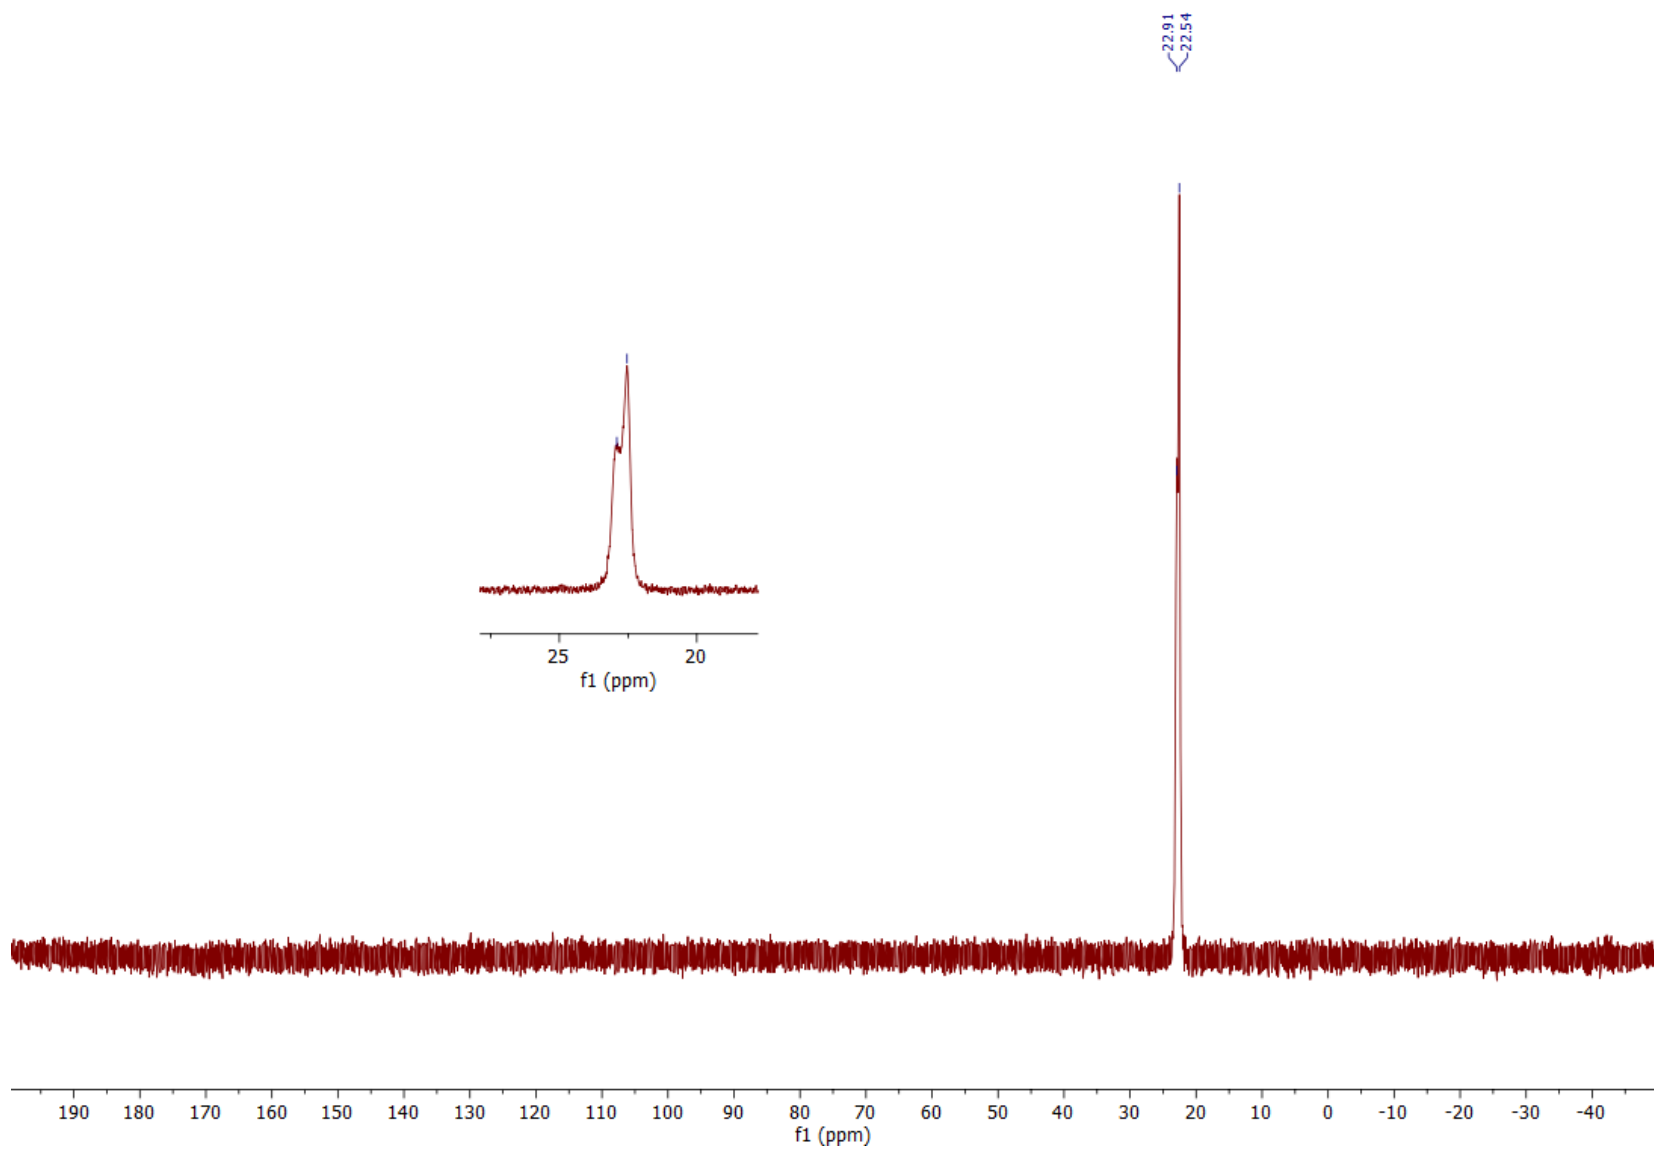

**Figure S39.**  $^{31}\text{P}$  NMR spectrum of **4e** diastereomer 1.

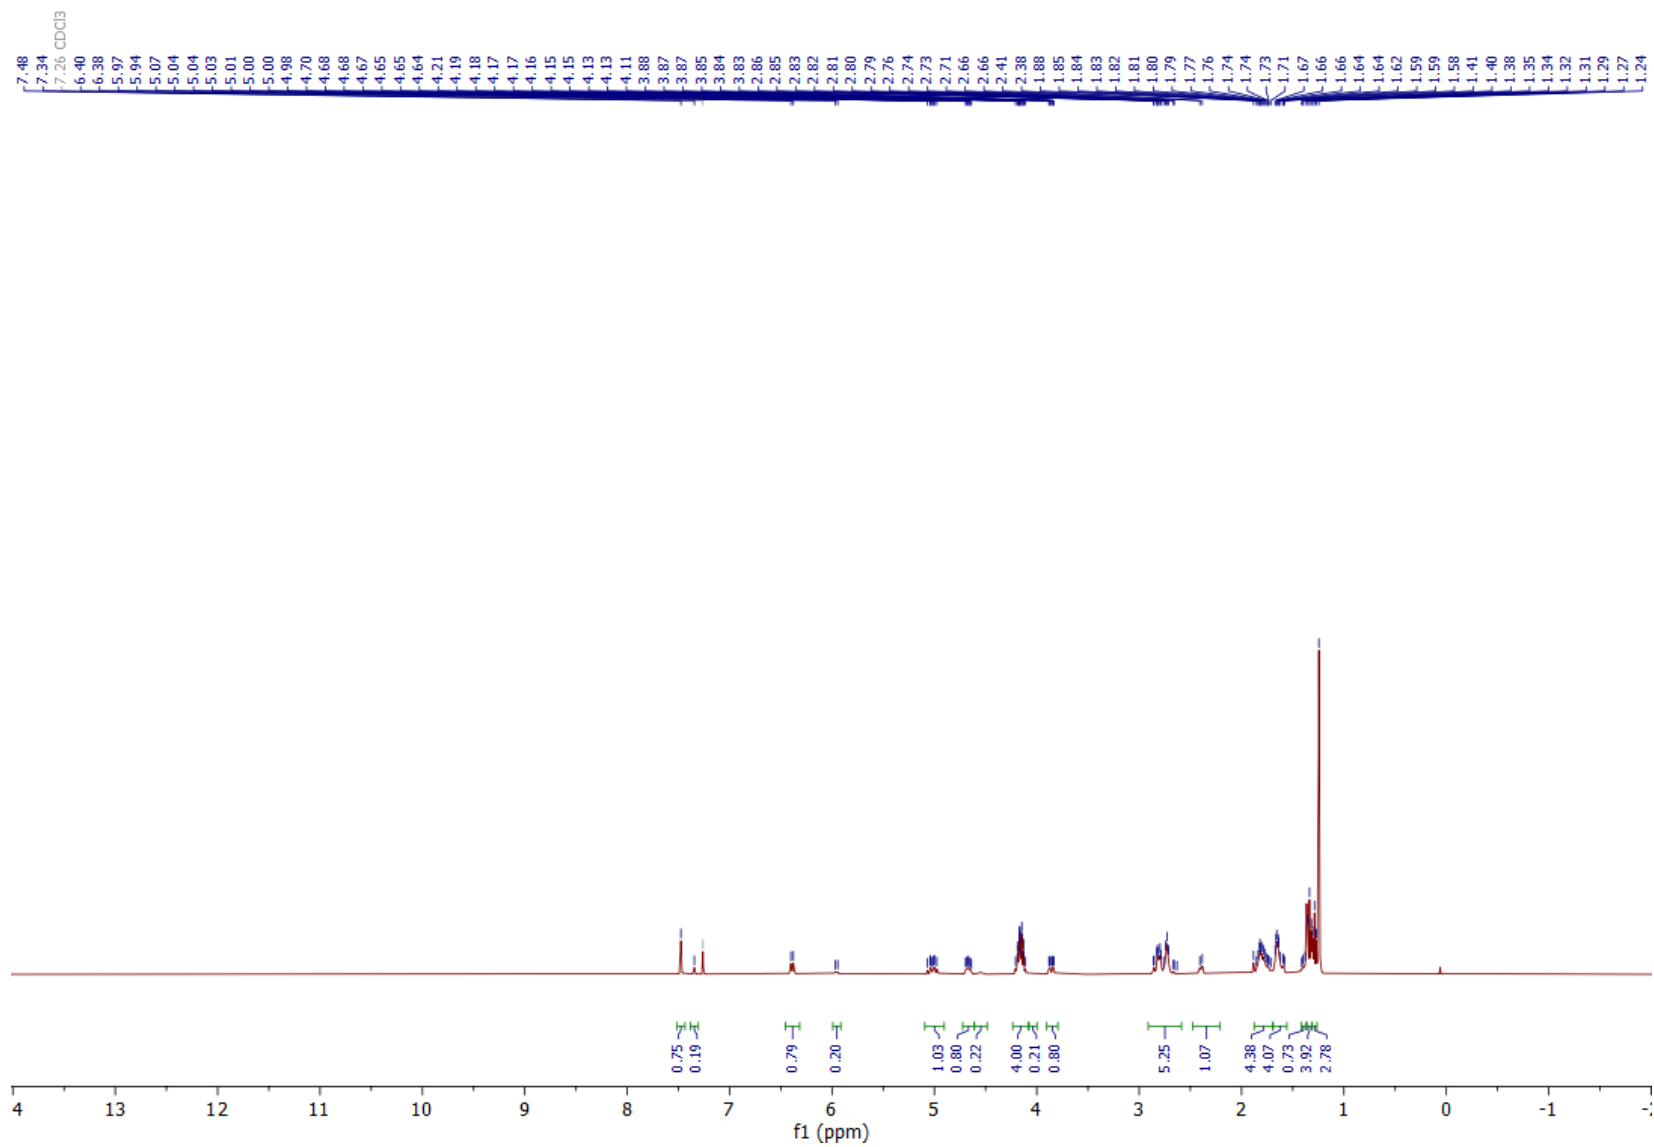

Figure S40. <sup>1</sup>H NMR spectrum of **4e** diastereomer 2.

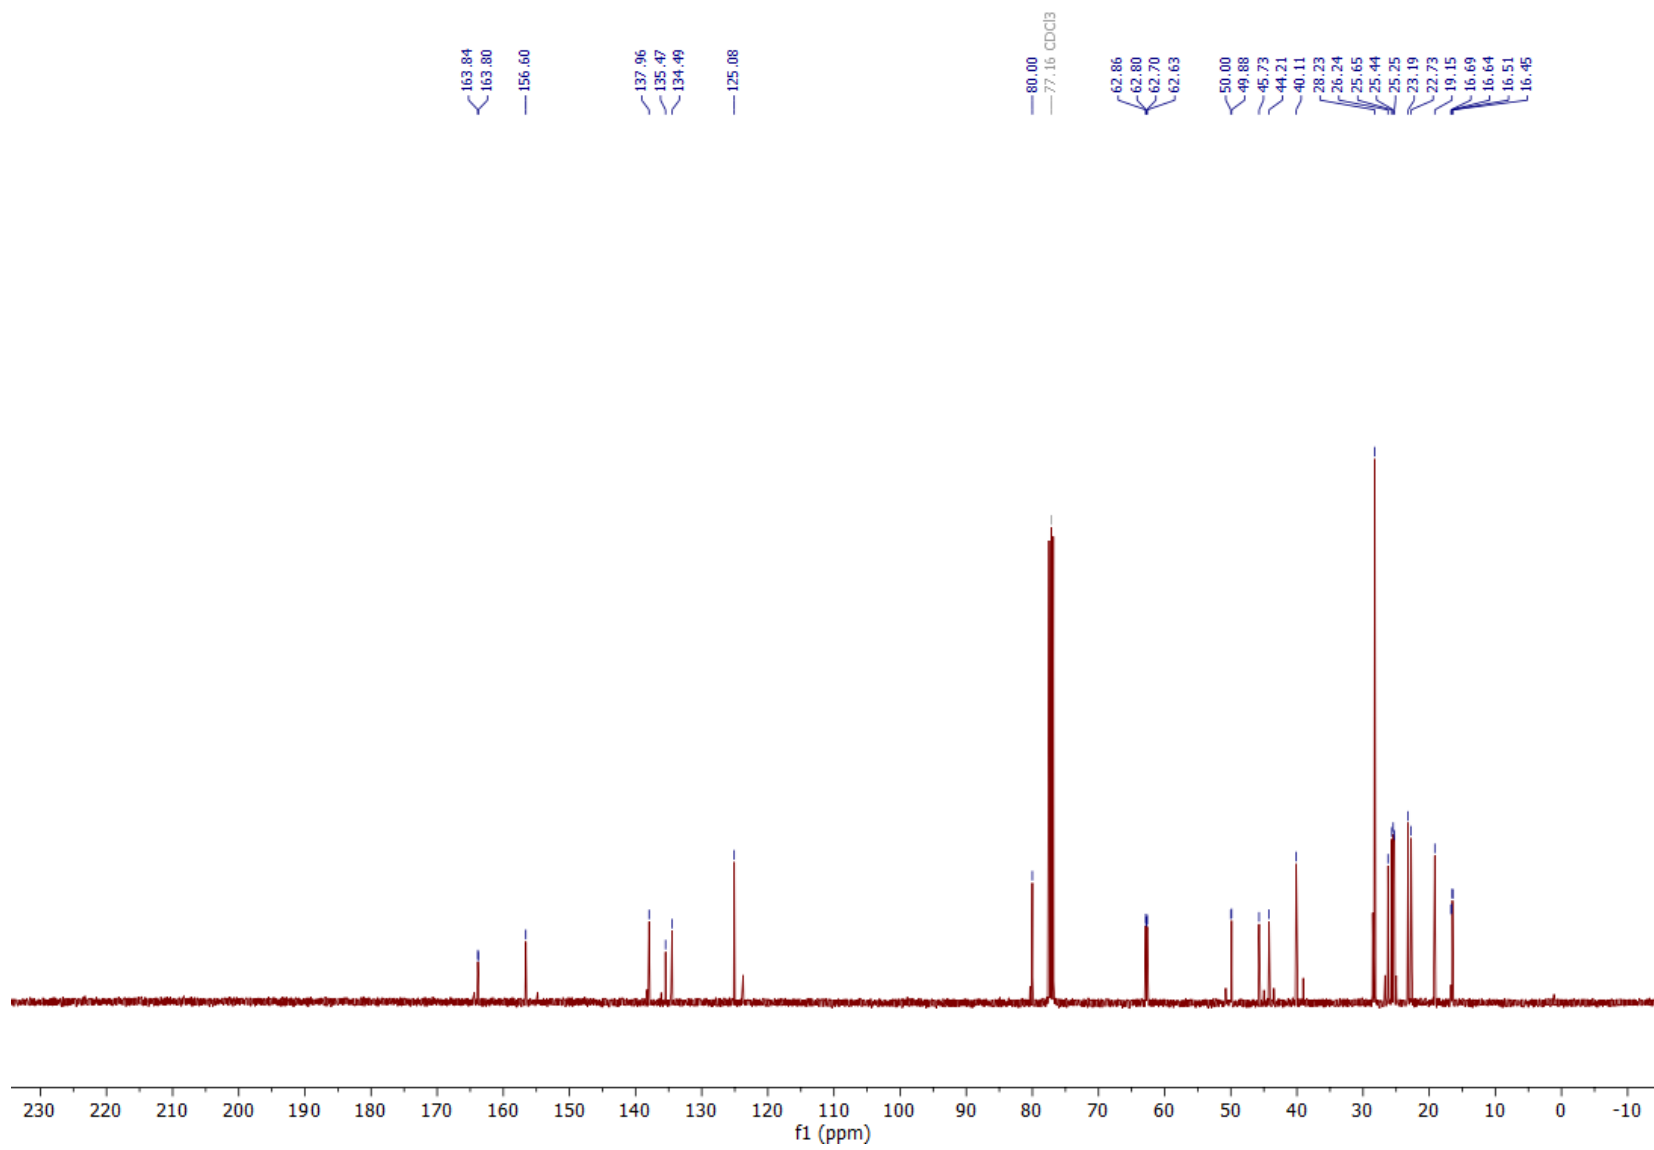

**Figure S41.** <sup>13</sup>C NMR spectrum of **4e** diastereomer 2.

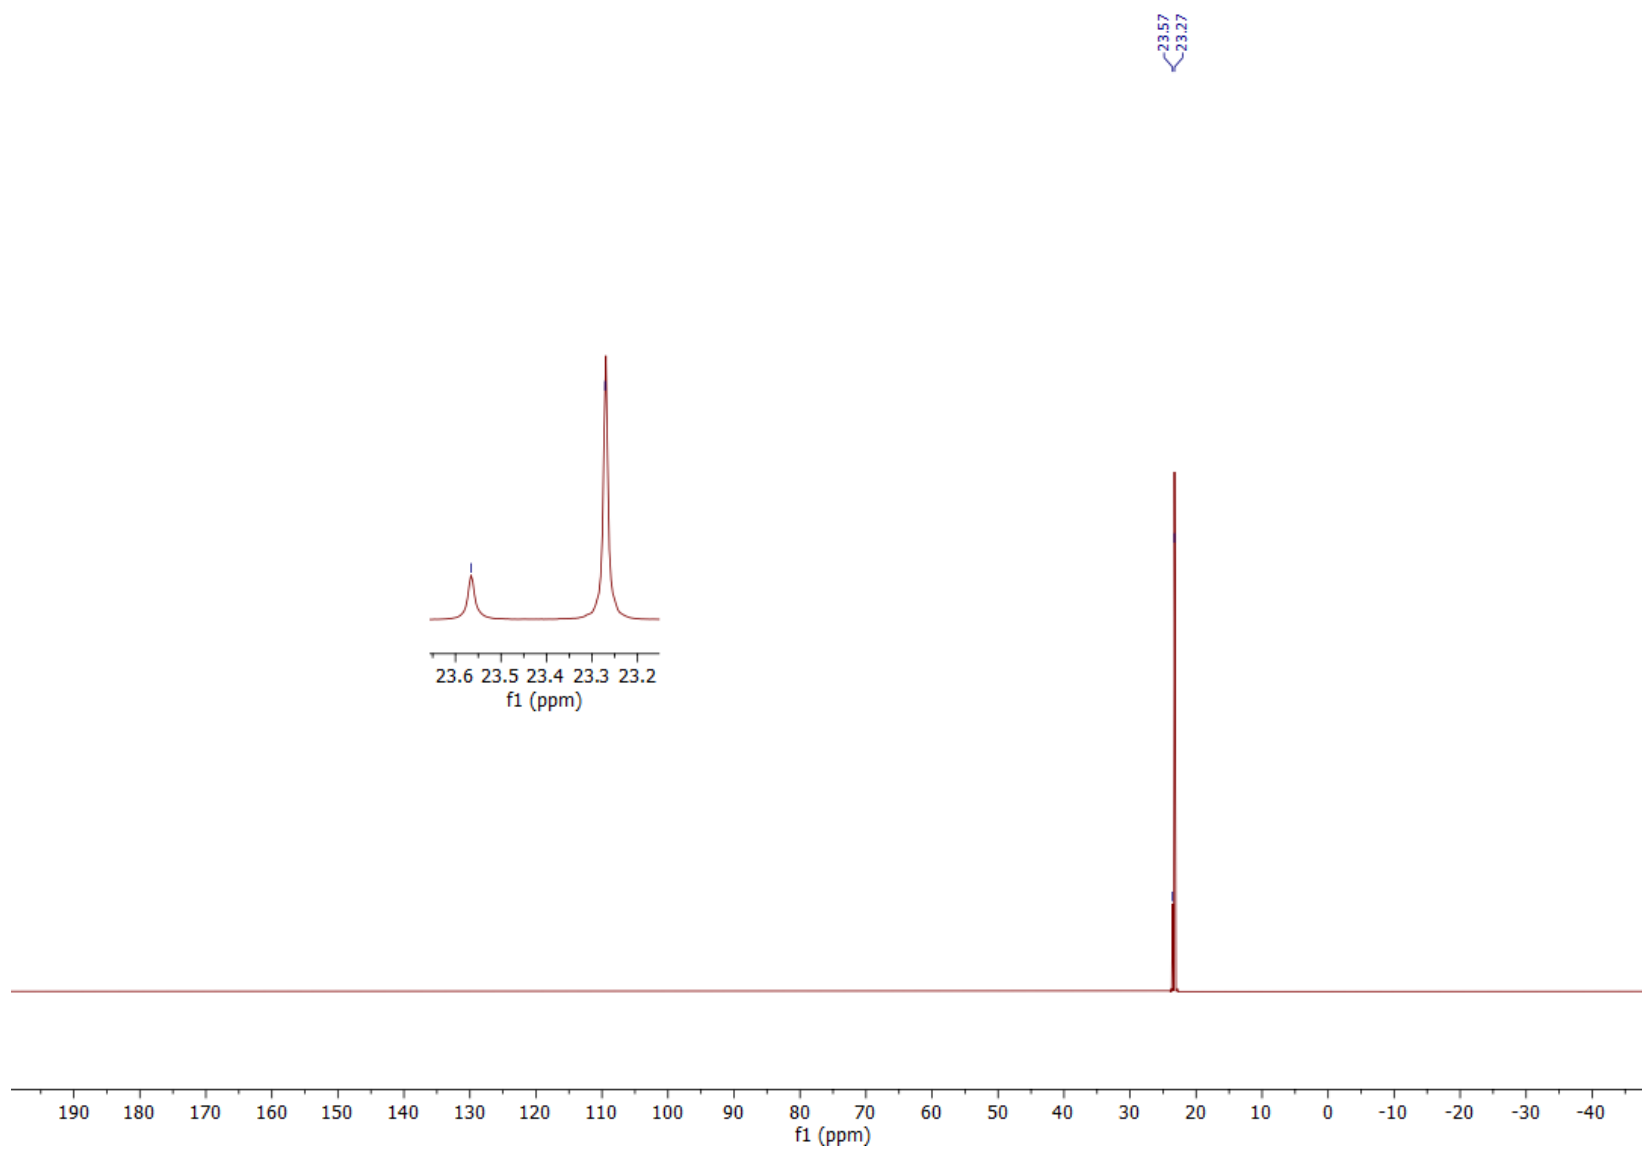

**Figure S42.**  $^{31}\text{P}$  NMR spectrum of **4e** diastereomer 2.

*Tert*-butyl 2-((diethoxyphosphoryl)(4,5,6,7-tetrahydrobenzo[*c*]thiophene-1-carboxamido)methyl)piperidine-1-carboxylate (**4f**)

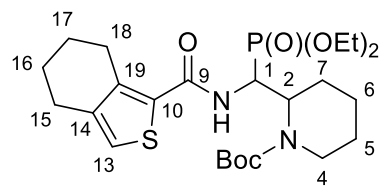





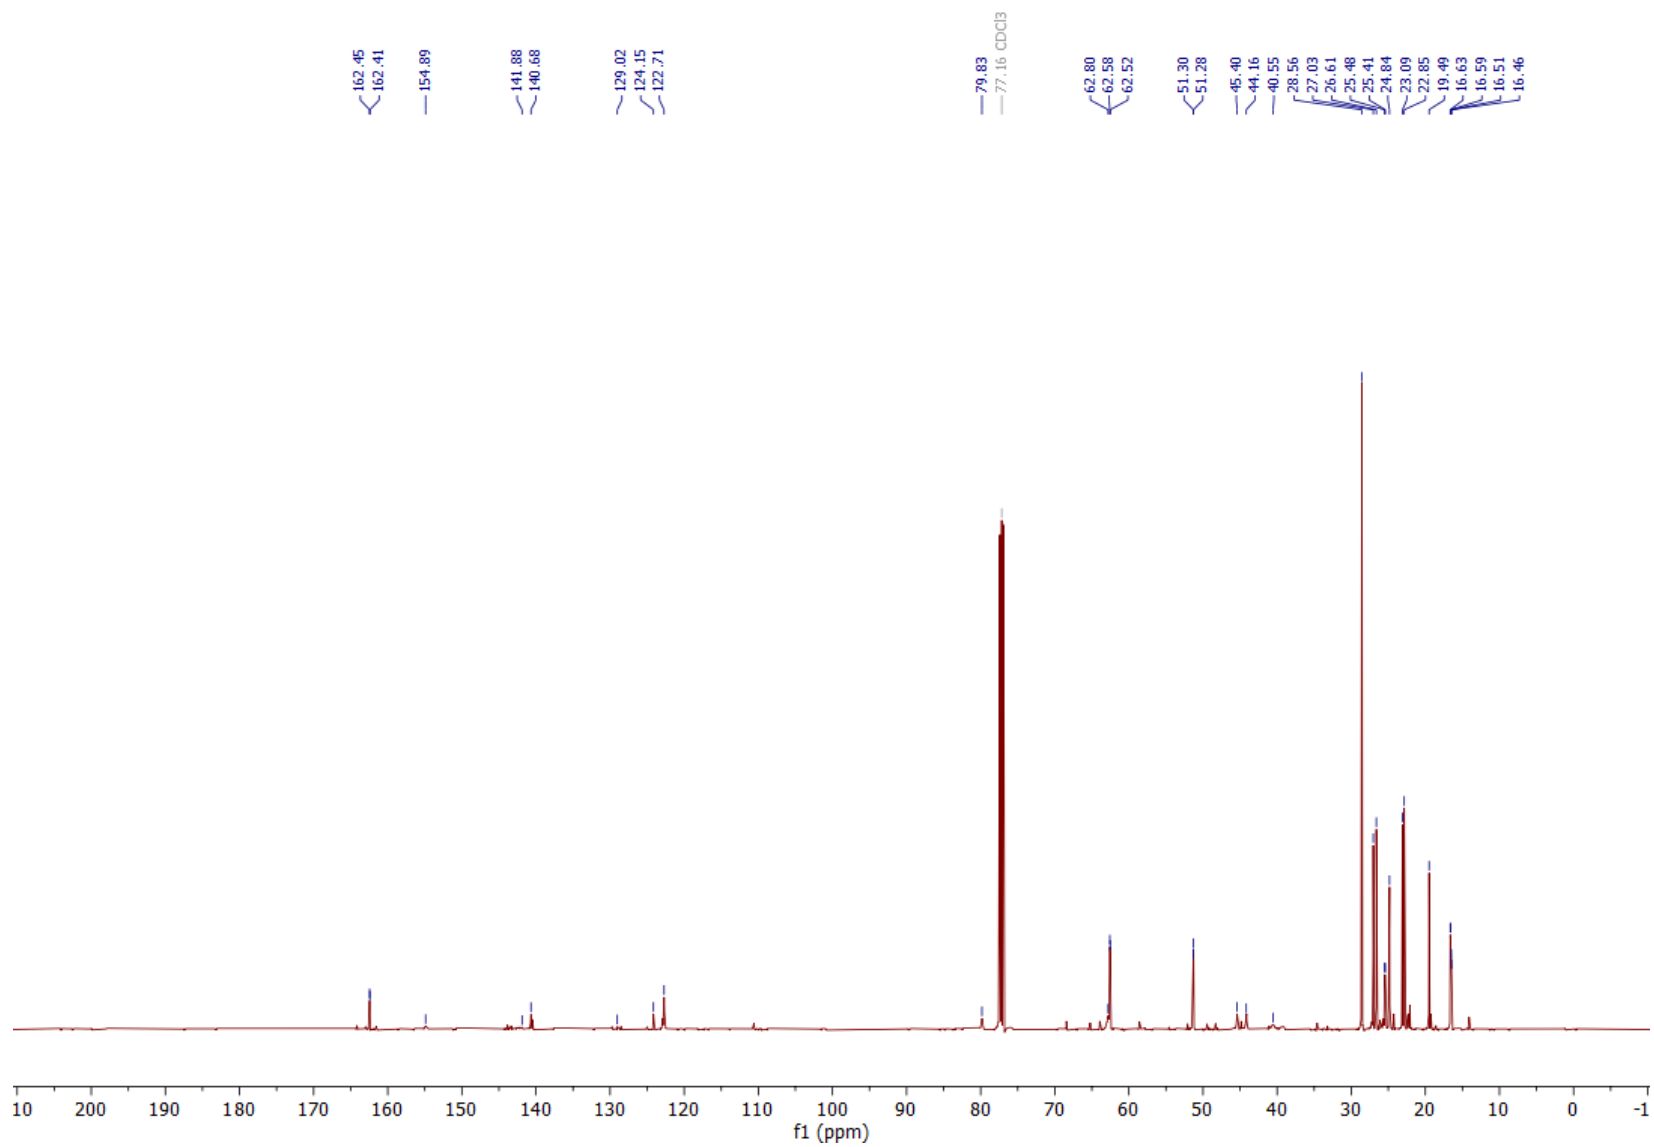

**Figure S44.**  $^{13}\text{C}$  NMR spectrum of **4f** diastereomer 1.

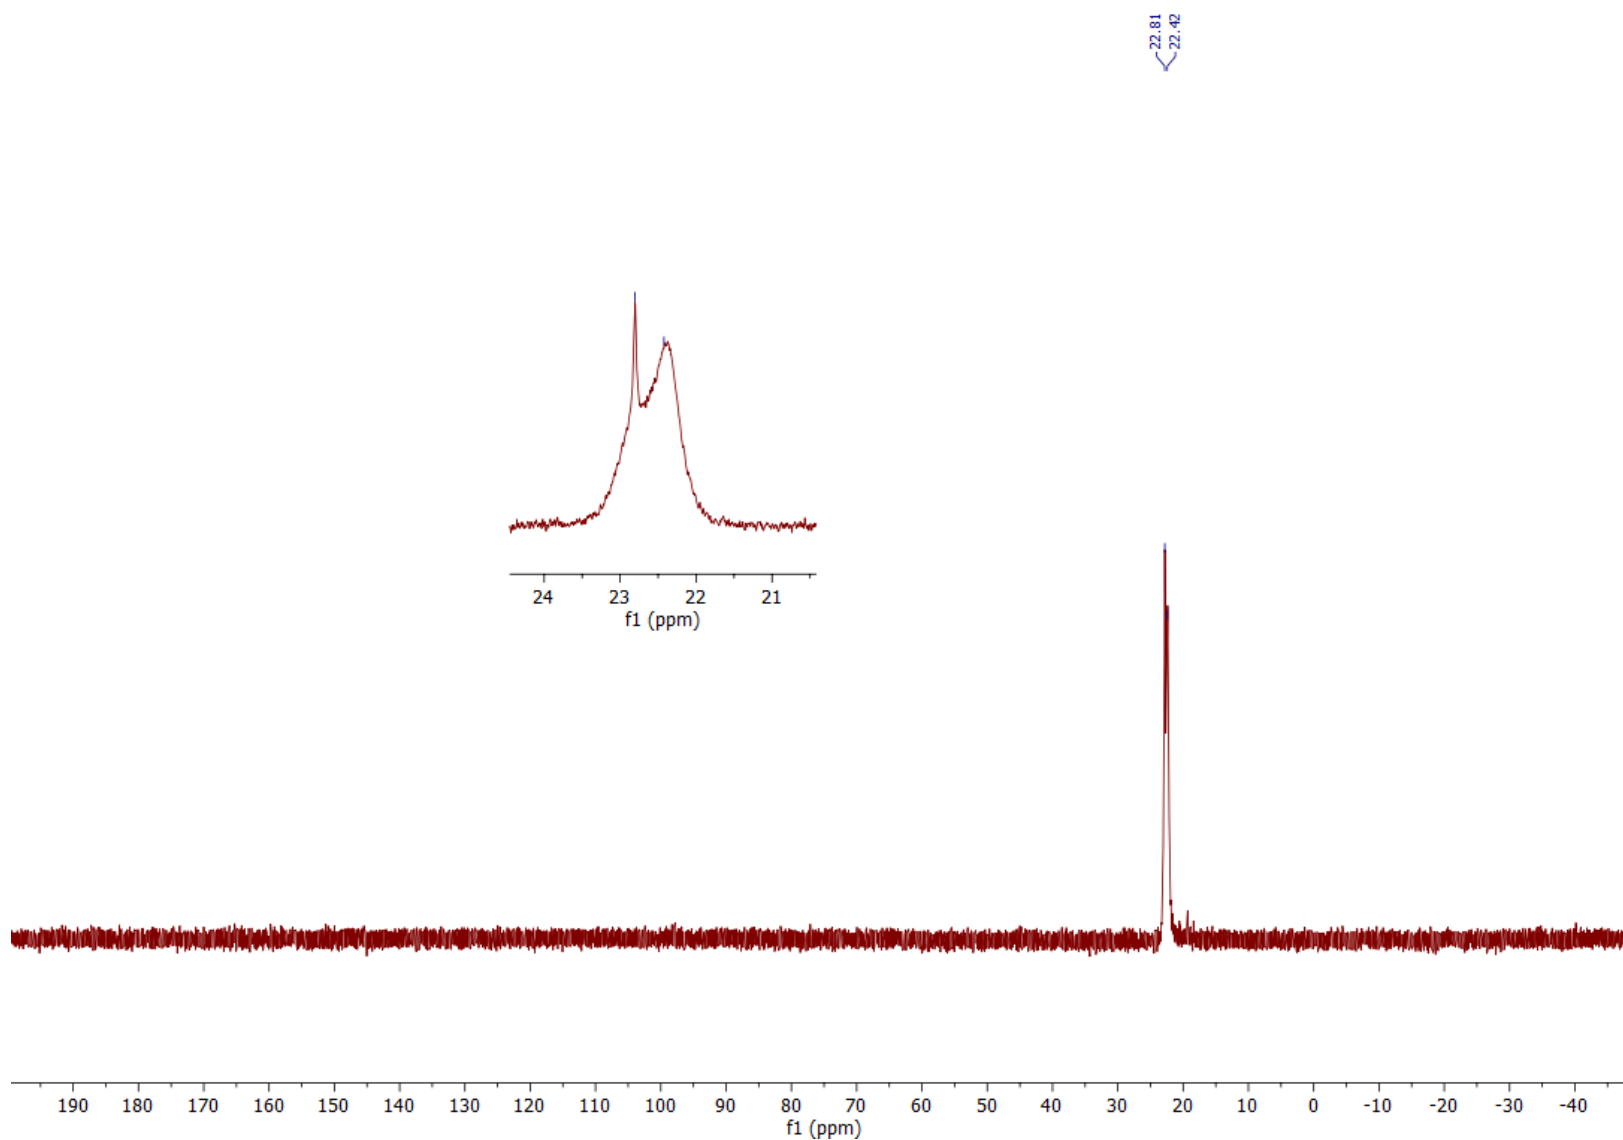

**Figure S45.**  $^{31}\text{P}$  NMR spectrum of **4f** diastereomer 1.

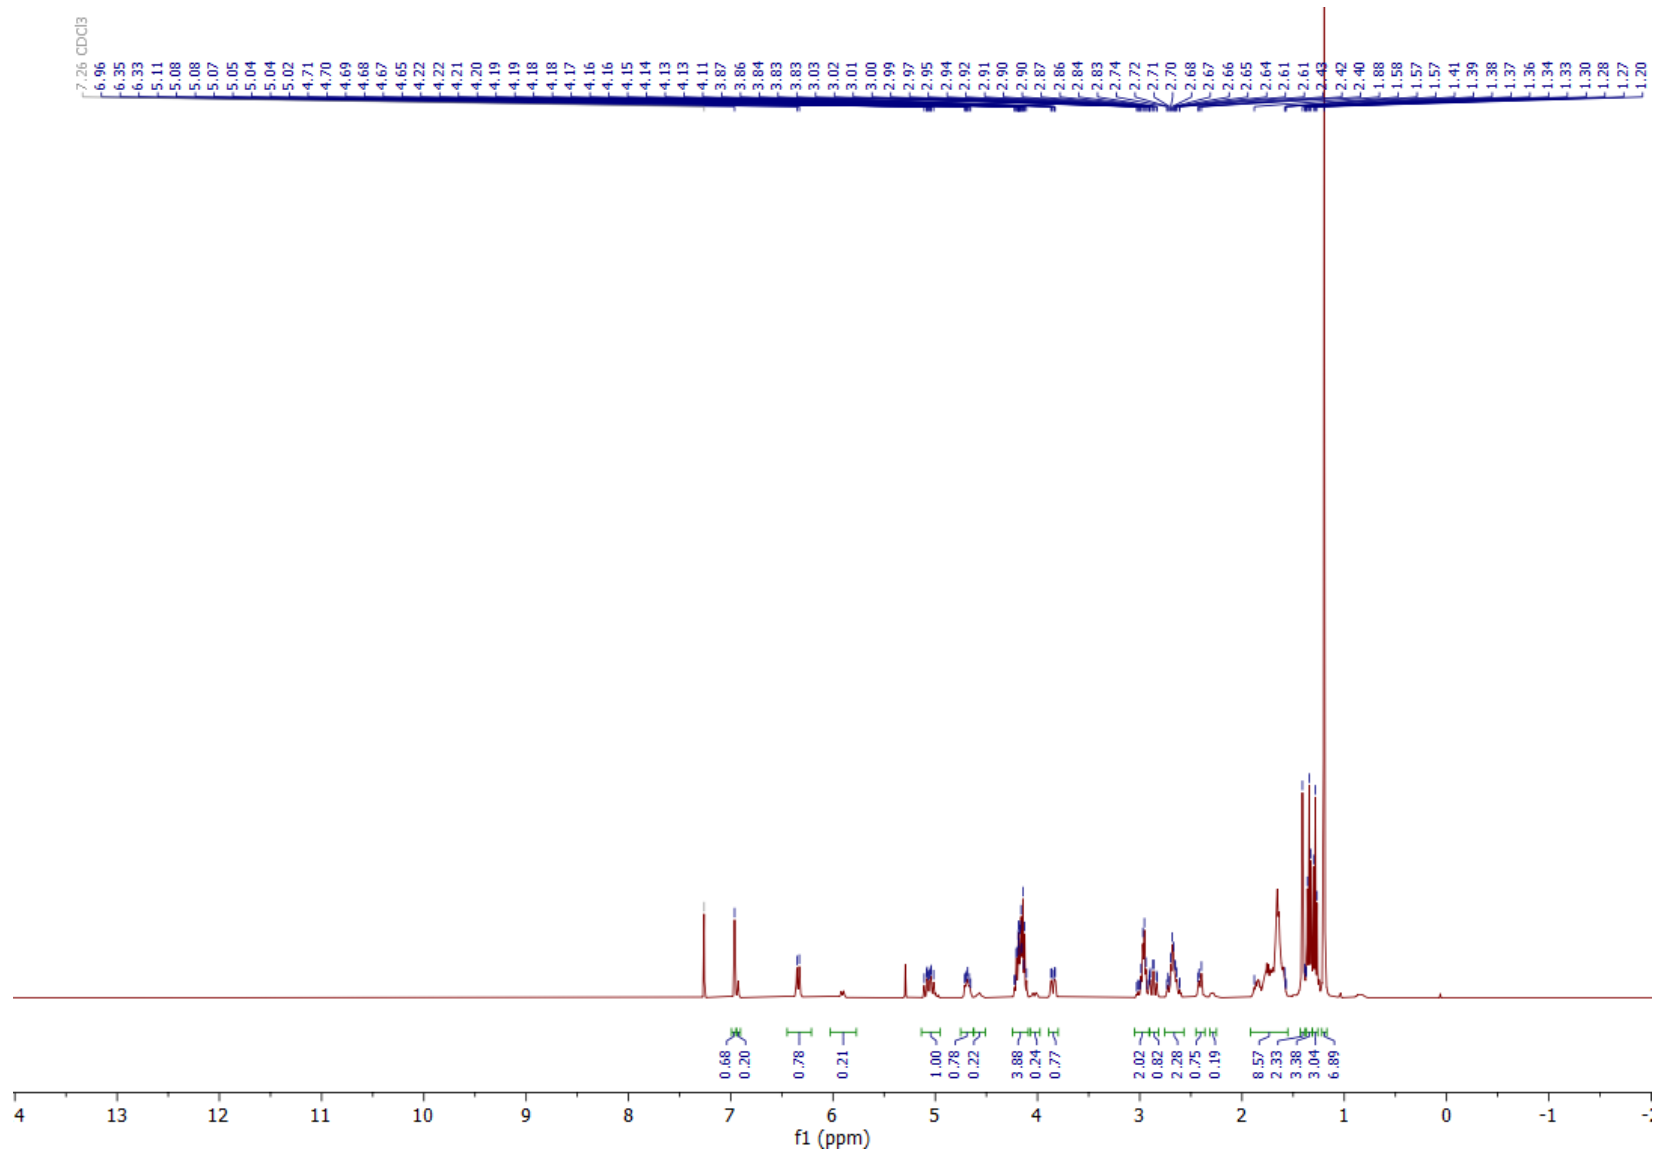

**Figure S46.** <sup>1</sup>H NMR spectrum of **4f** diastereomer 2.

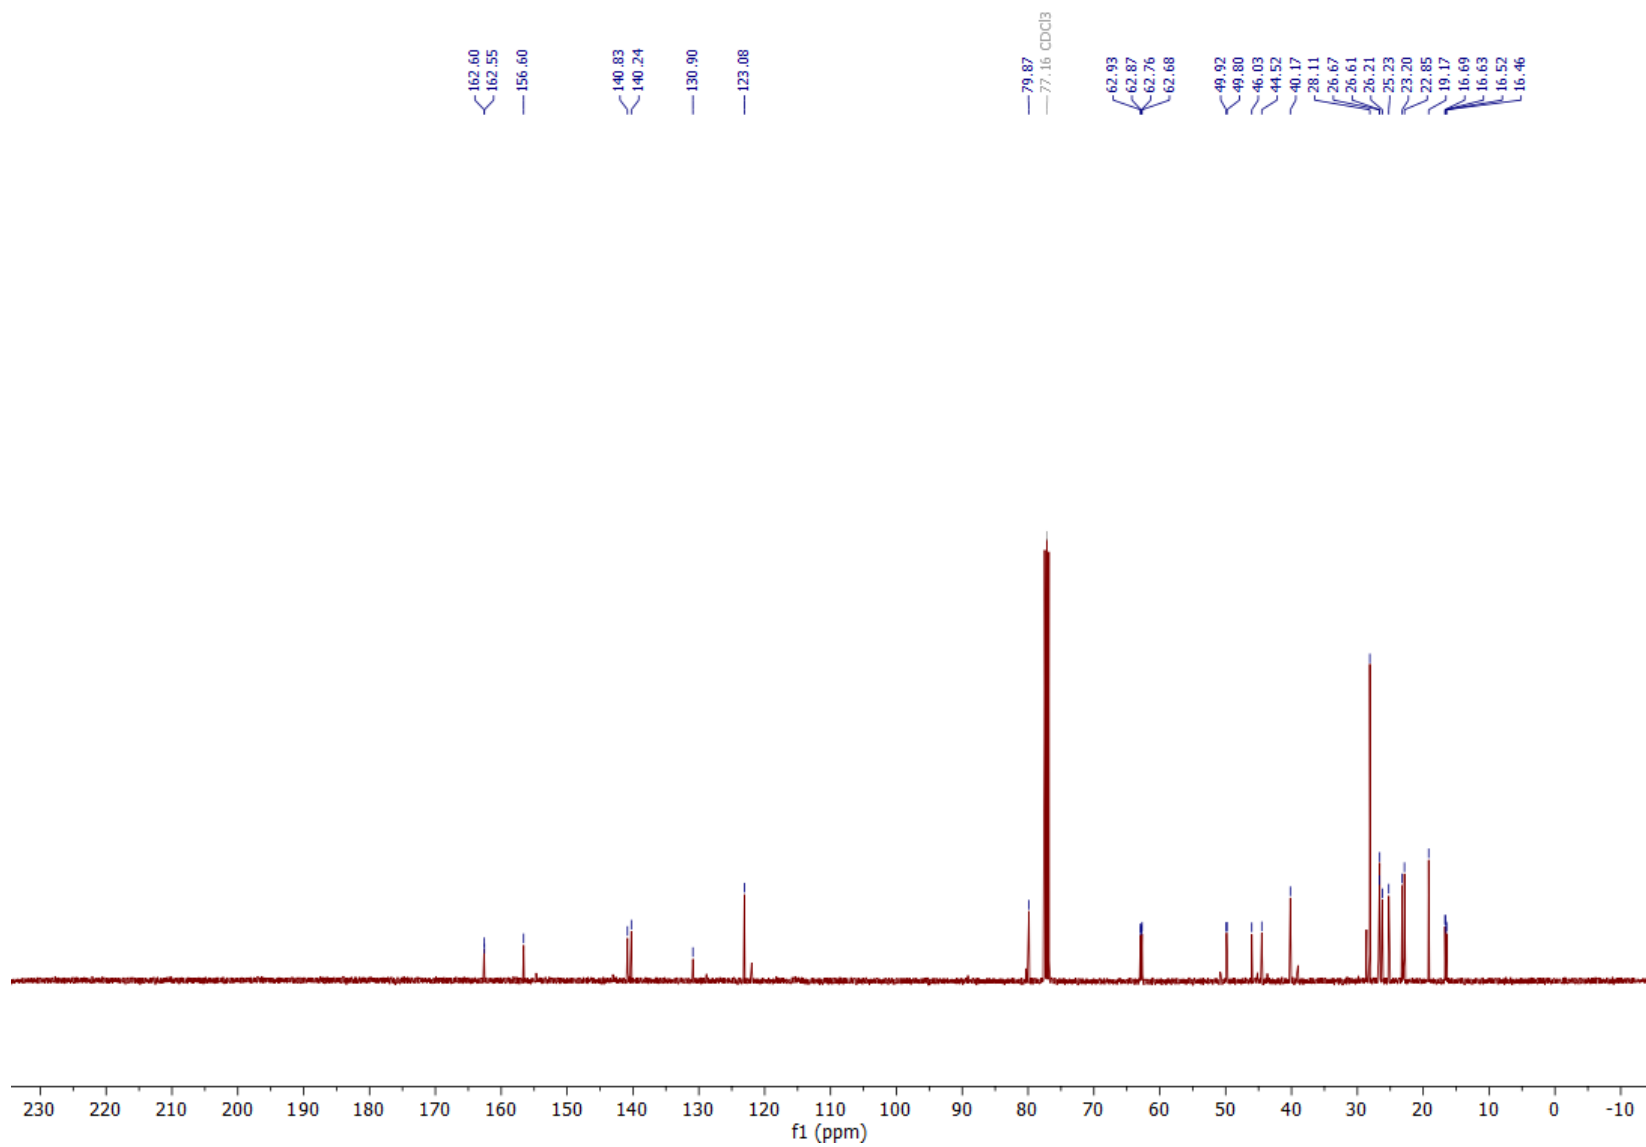

**Figure S47.**  $^{13}\text{C}$  NMR spectrum of **4f** diastereomer 2.

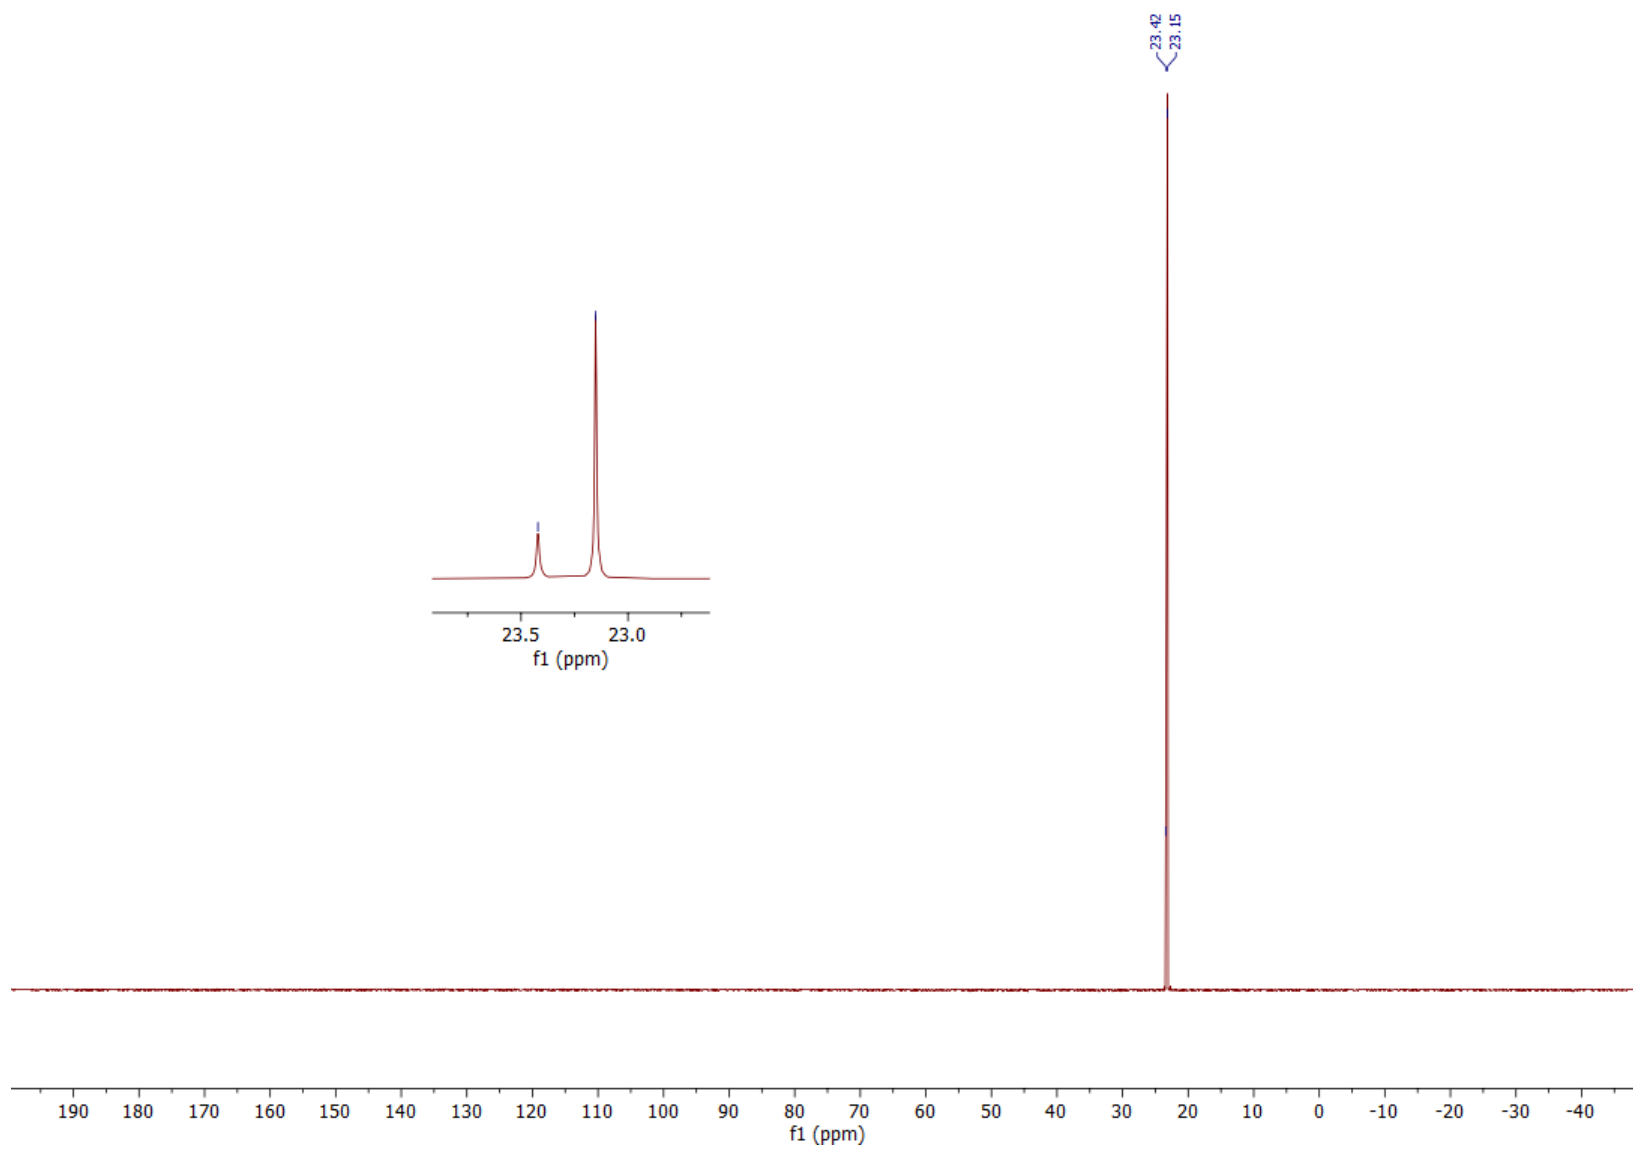

**Figure S48.**  $^{31}\text{P}$  NMR spectrum of **4f** diastereomer 2.

*Tert*-butyl 2-((benzo[*b*]thiophene-2-carboxamido)(diethoxyphosphoryl)methyl)piperidine-1-carboxylate (**4g**)

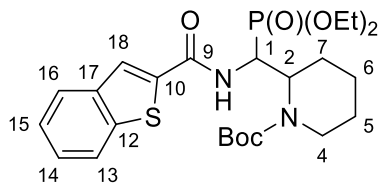

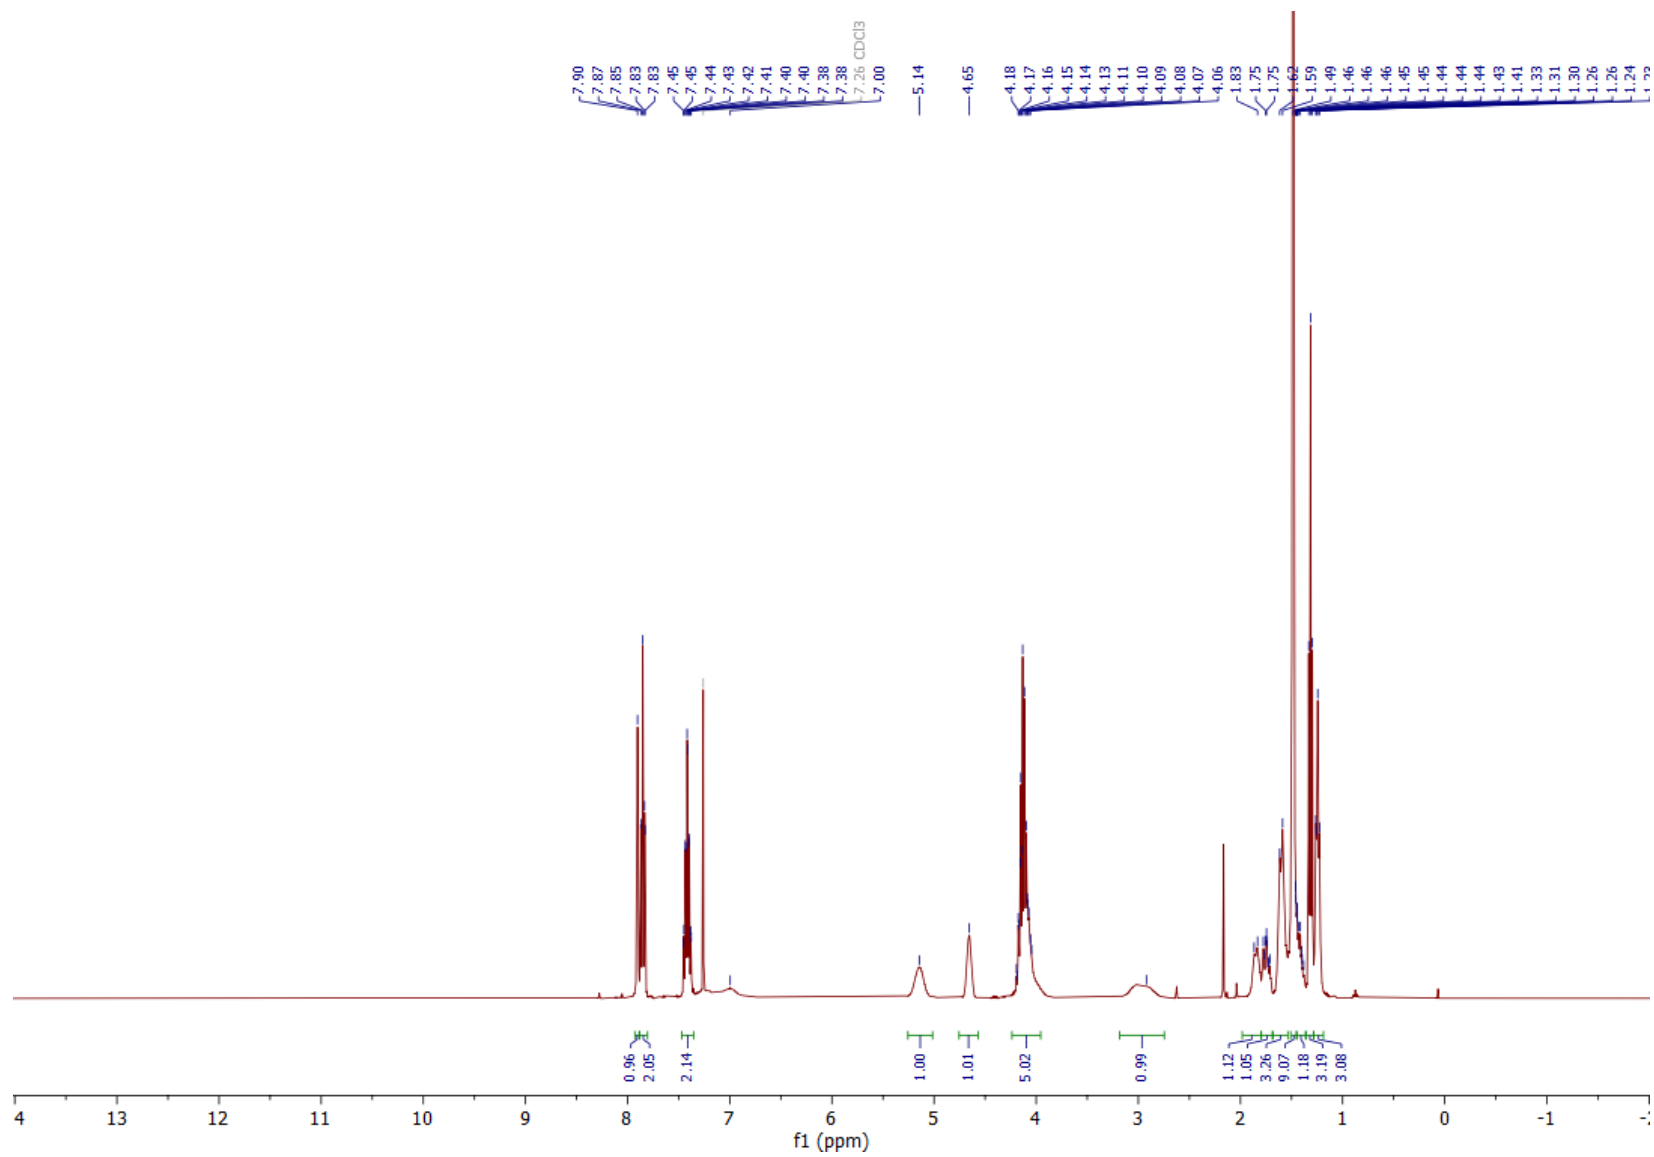

**Figure S49.** <sup>1</sup>H NMR spectrum of **4g** diastereomer 1.



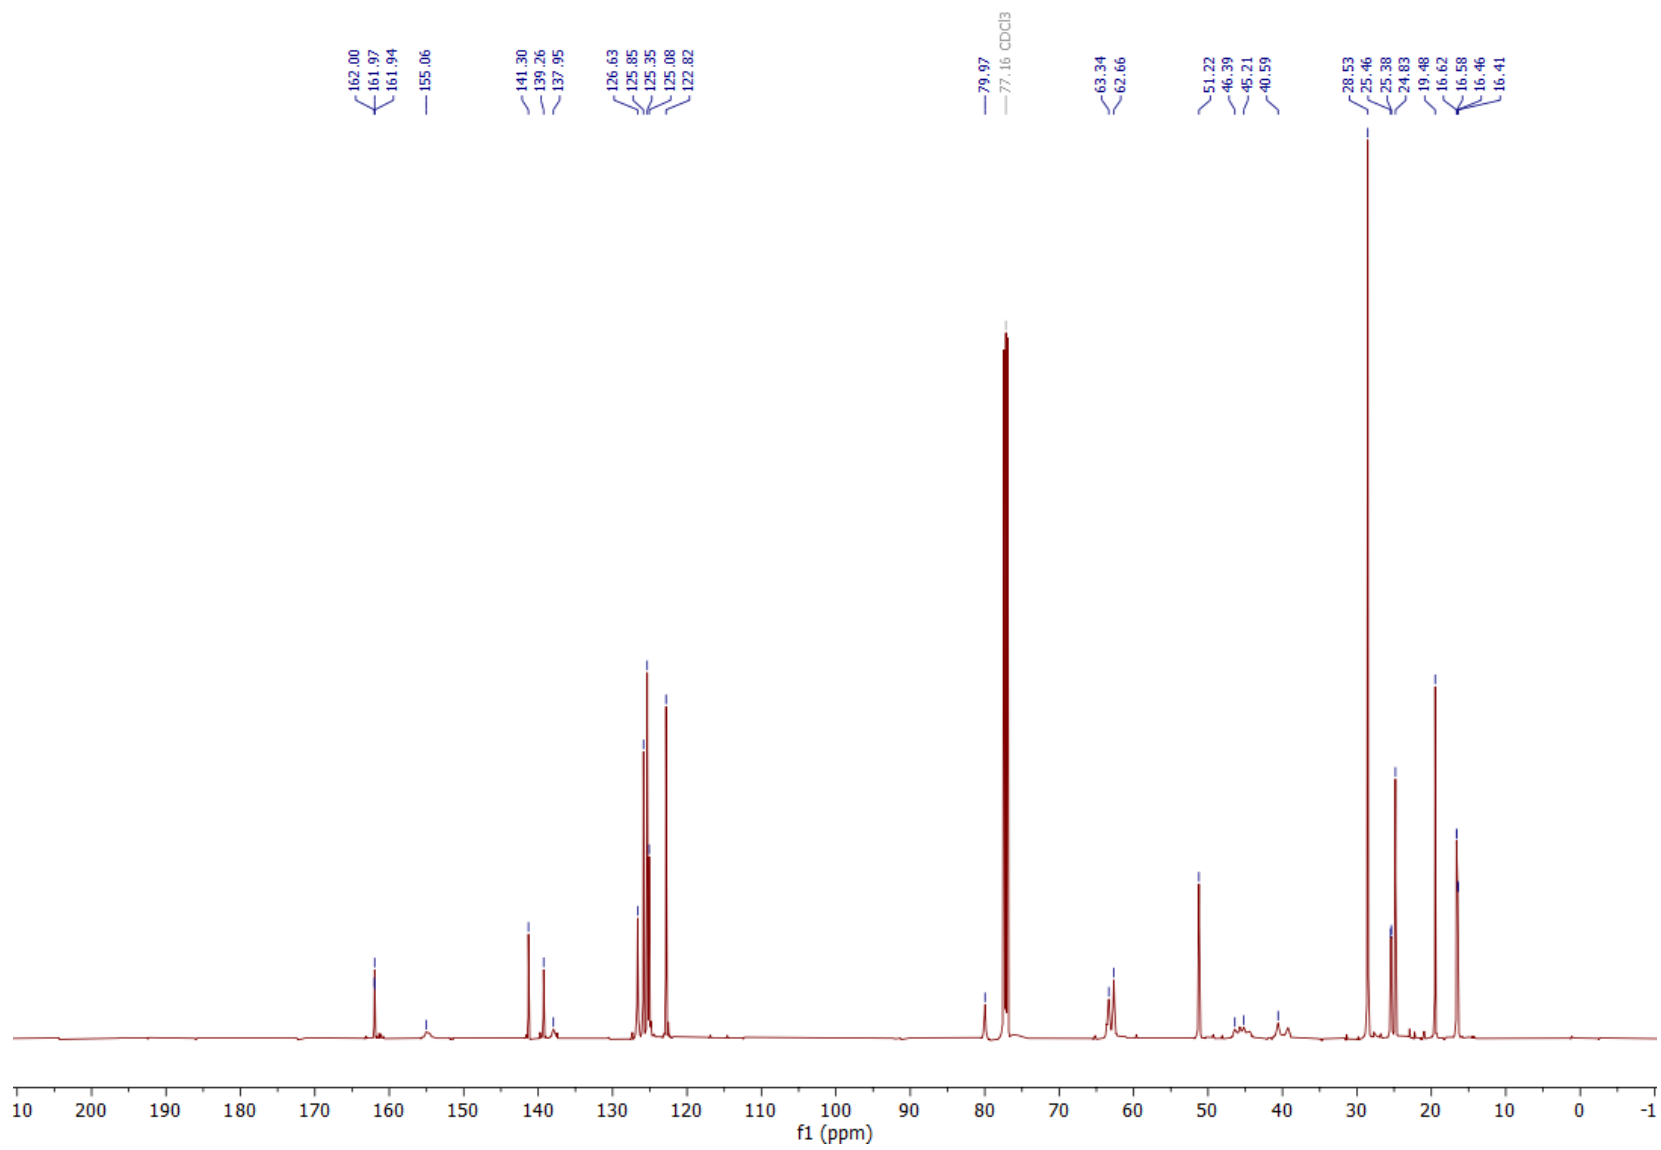

**Figure S50.** <sup>13</sup>C NMR spectrum of **4g** diastereomer **1**.

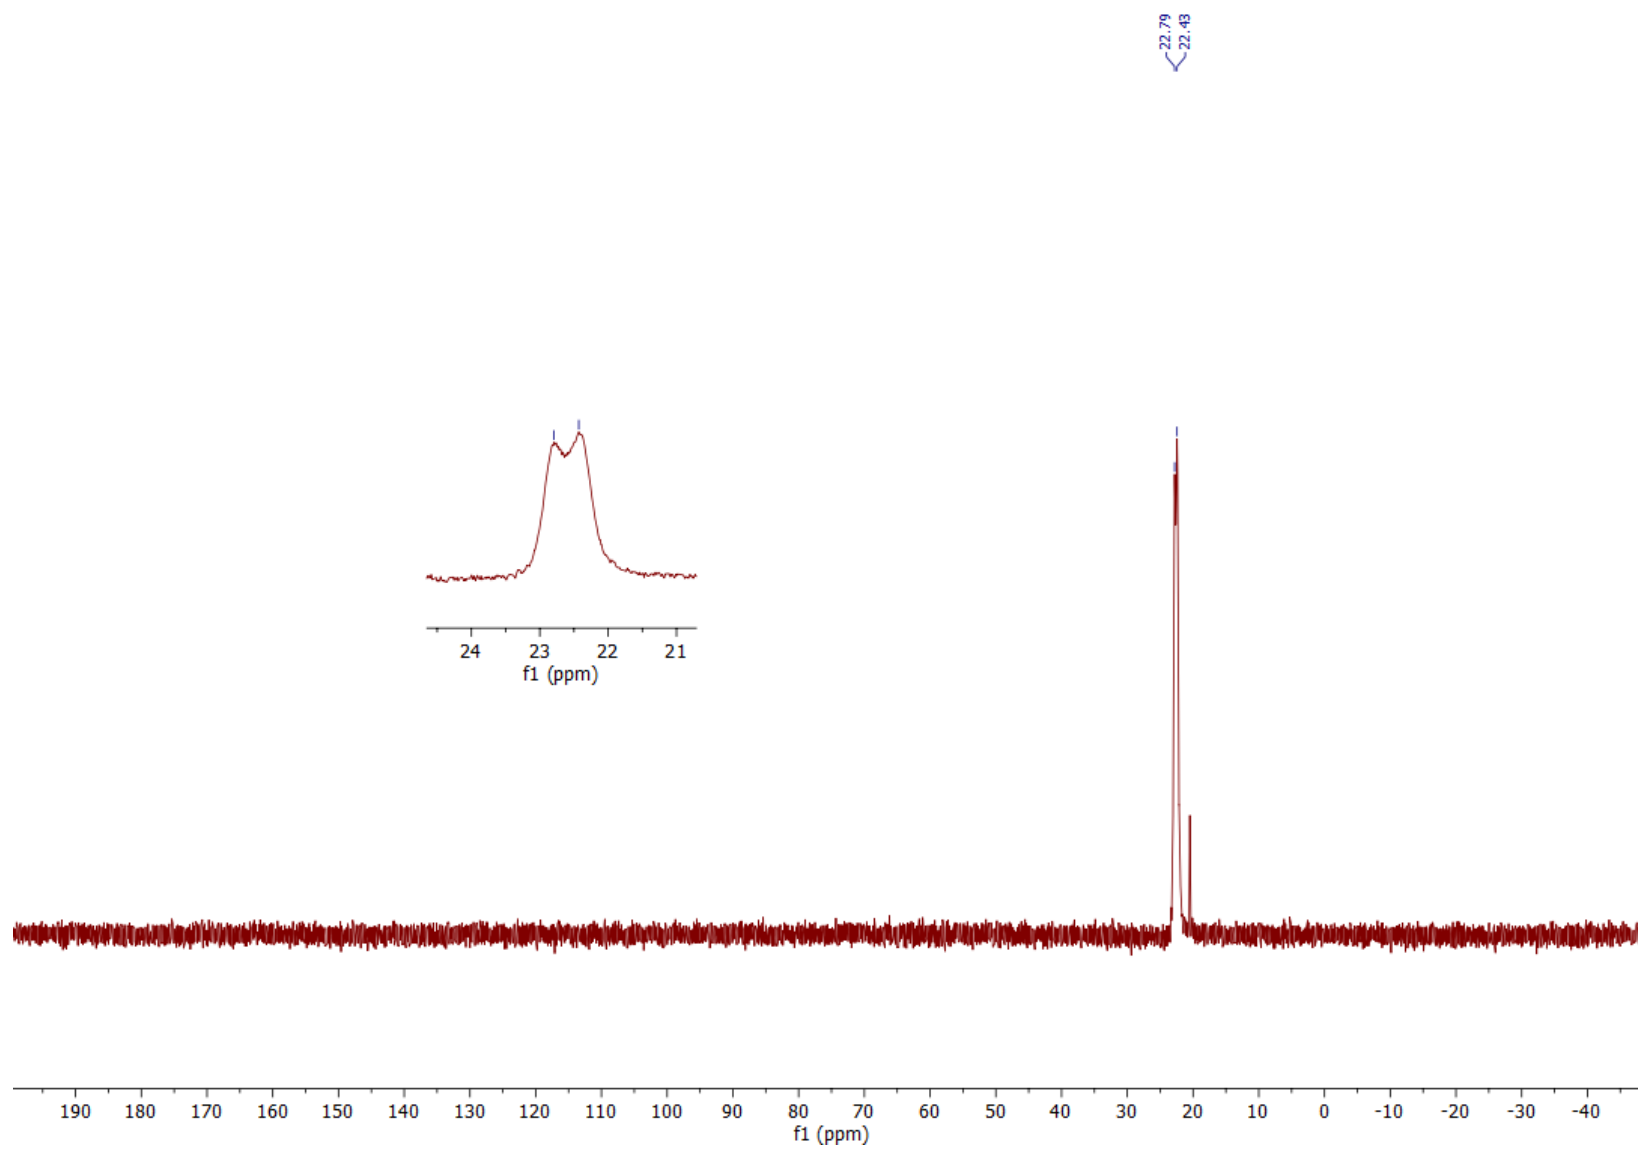

**Figure S51.**  $^{31}\text{P}$  NMR spectrum of **4g** diastereomer 1.

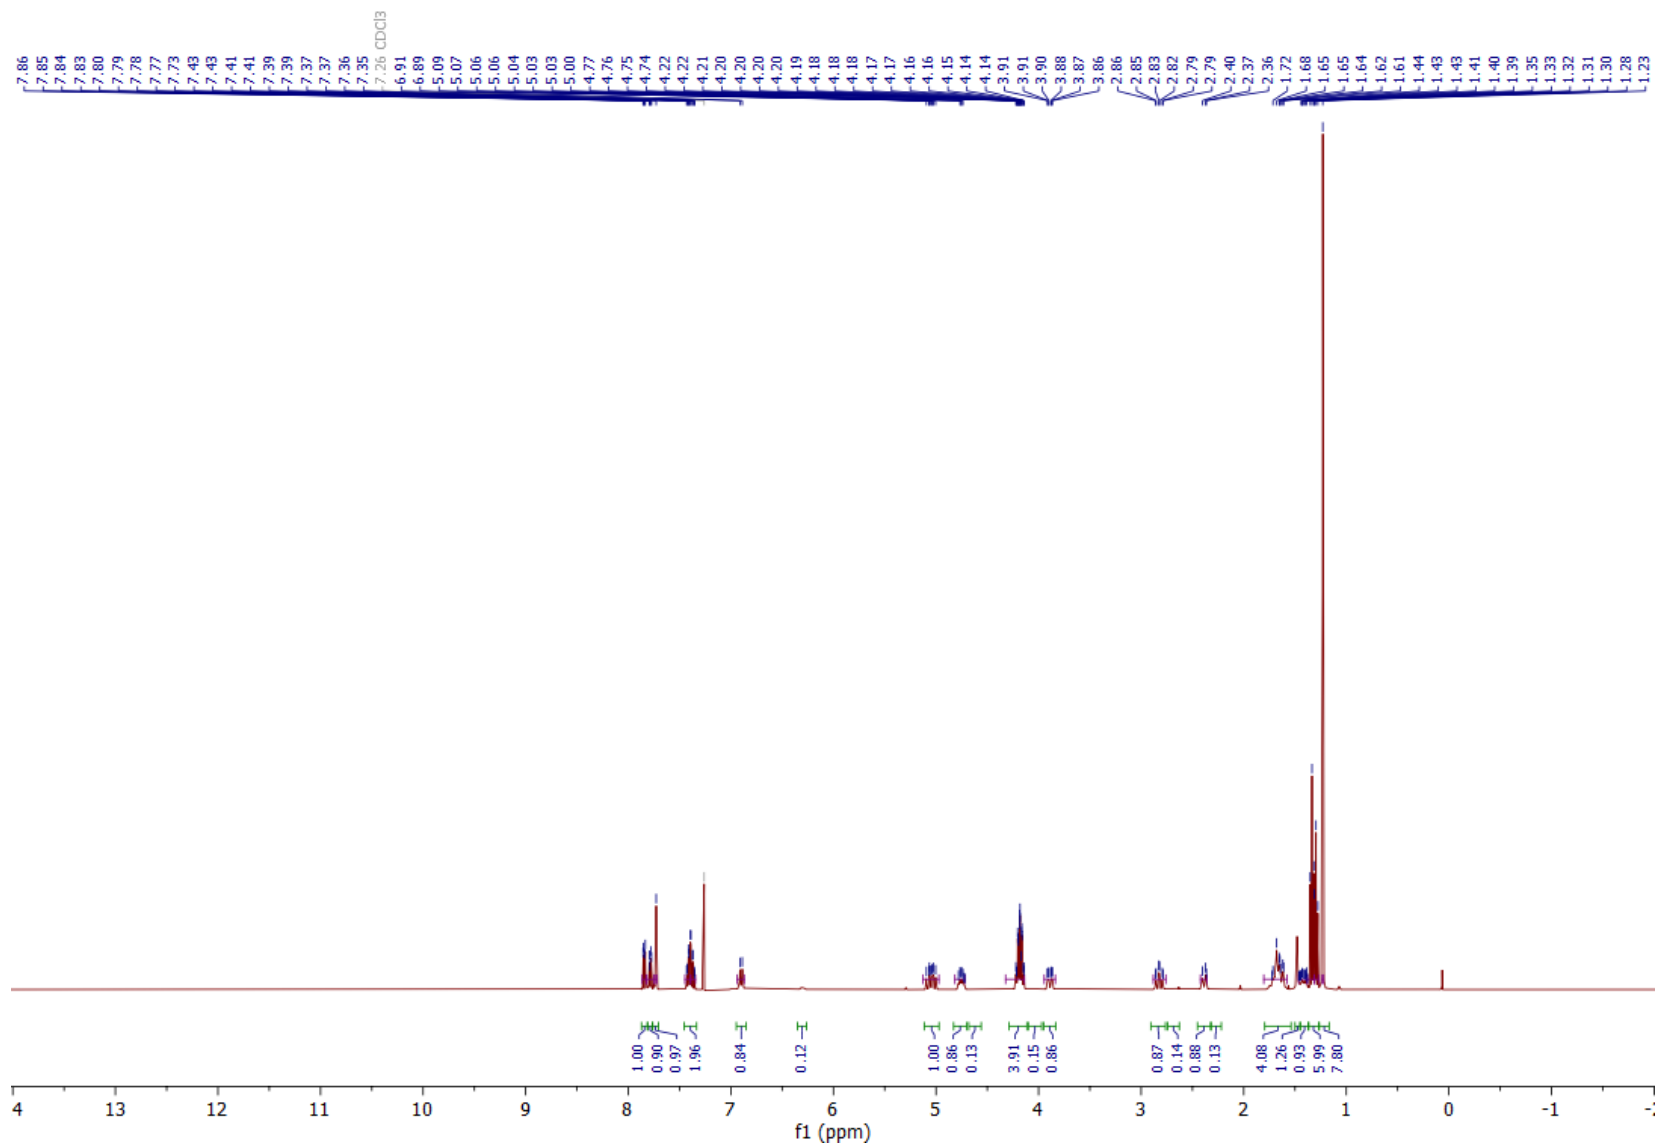

Figure S52. <sup>1</sup>H NMR spectrum of **4g** diastereomer 2.

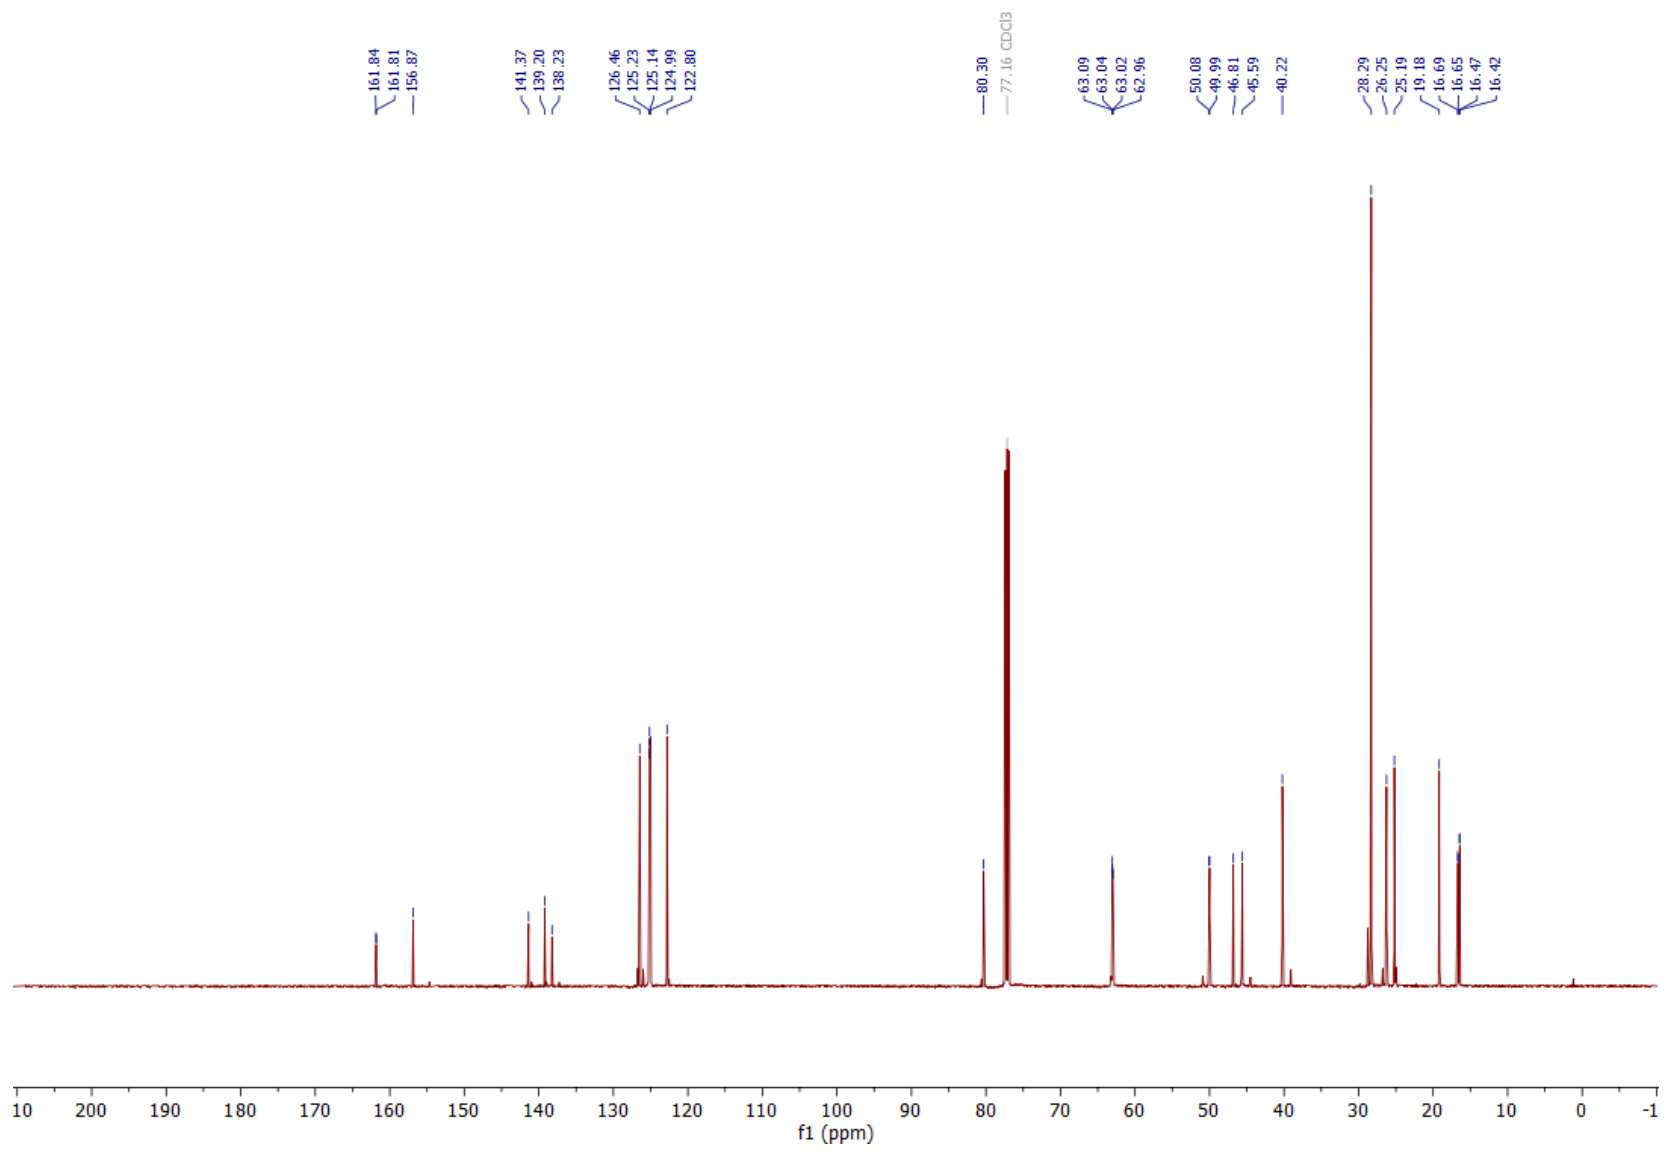

**Figure S53.** <sup>13</sup>C NMR spectrum of **4g** diastereomer 2.

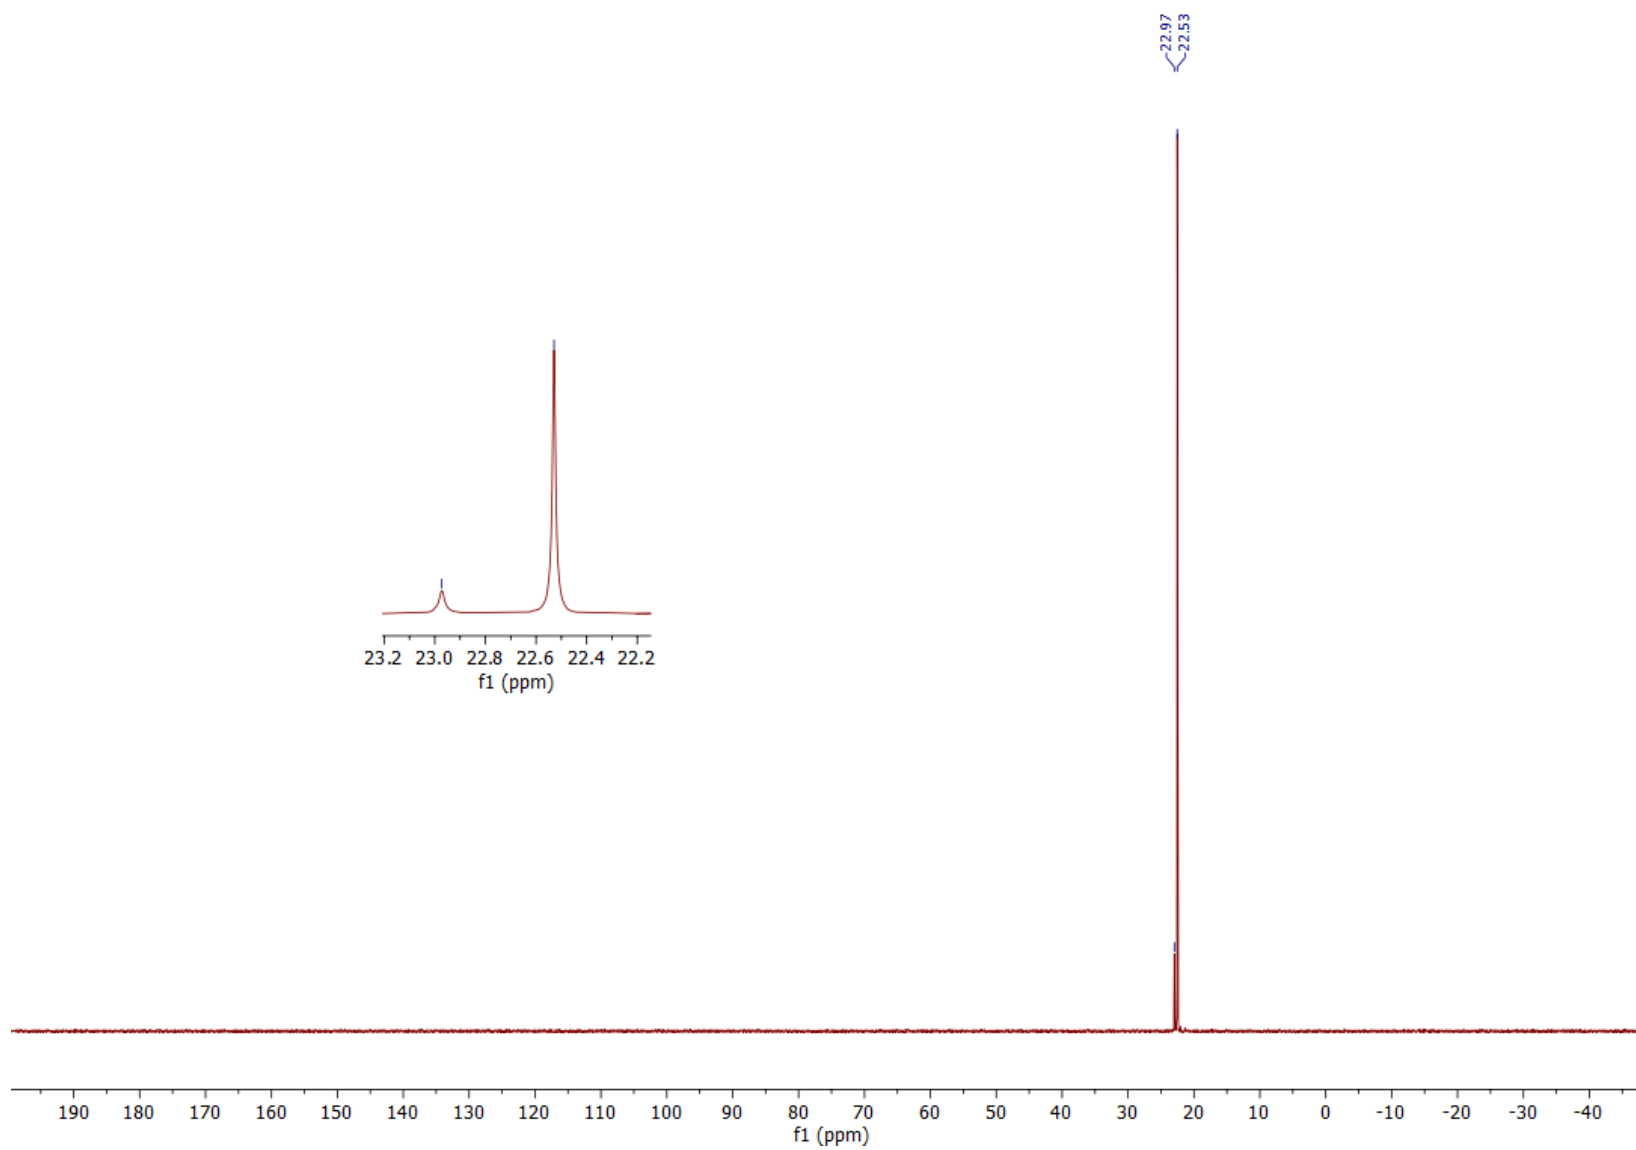

**Figure S54.**  $^{31}\text{P}$  NMR spectrum of **4g** diastereomer 2.

*Tert*-butyl 2-((benzo[*b*]thiophene-3-carboxamido)(diethoxyphosphoryl)methyl)piperidine-1-carboxylate (**4h**)

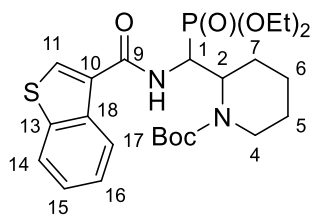

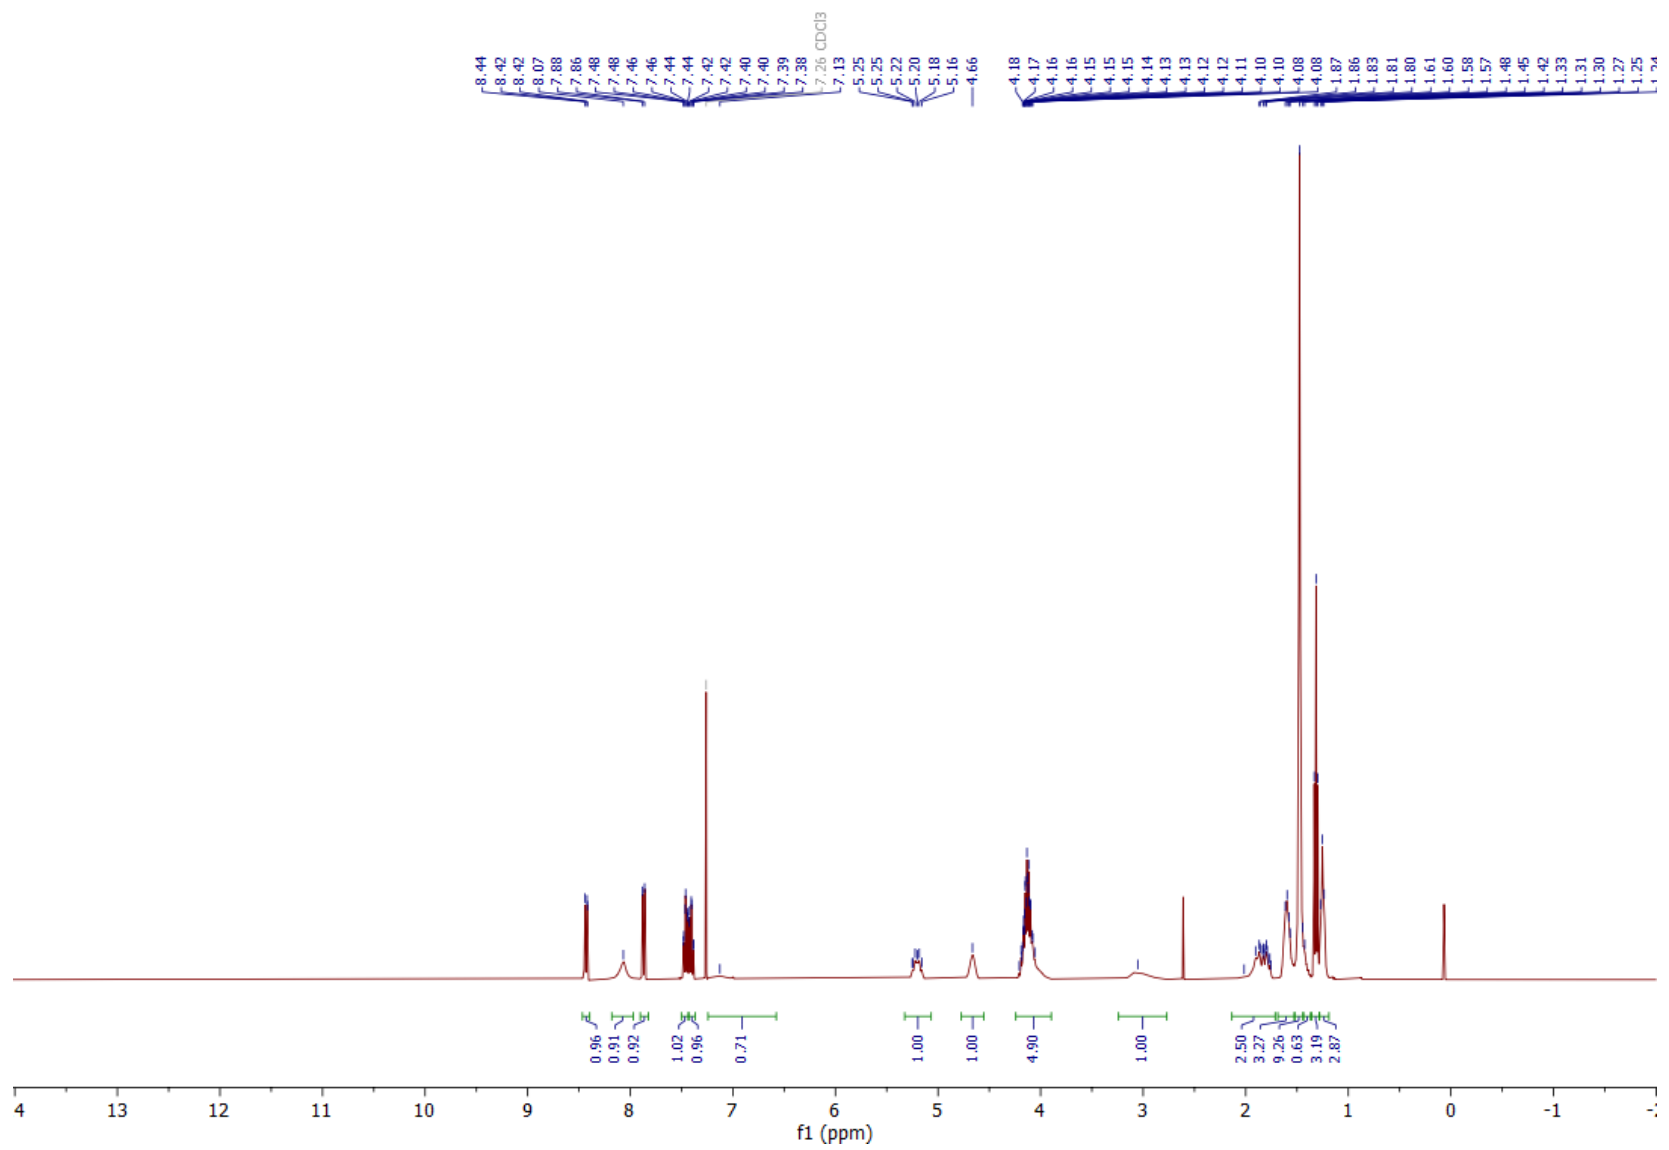

Figure S55.  $^1\text{H}$  NMR spectrum of **4h** diastereomer 1.

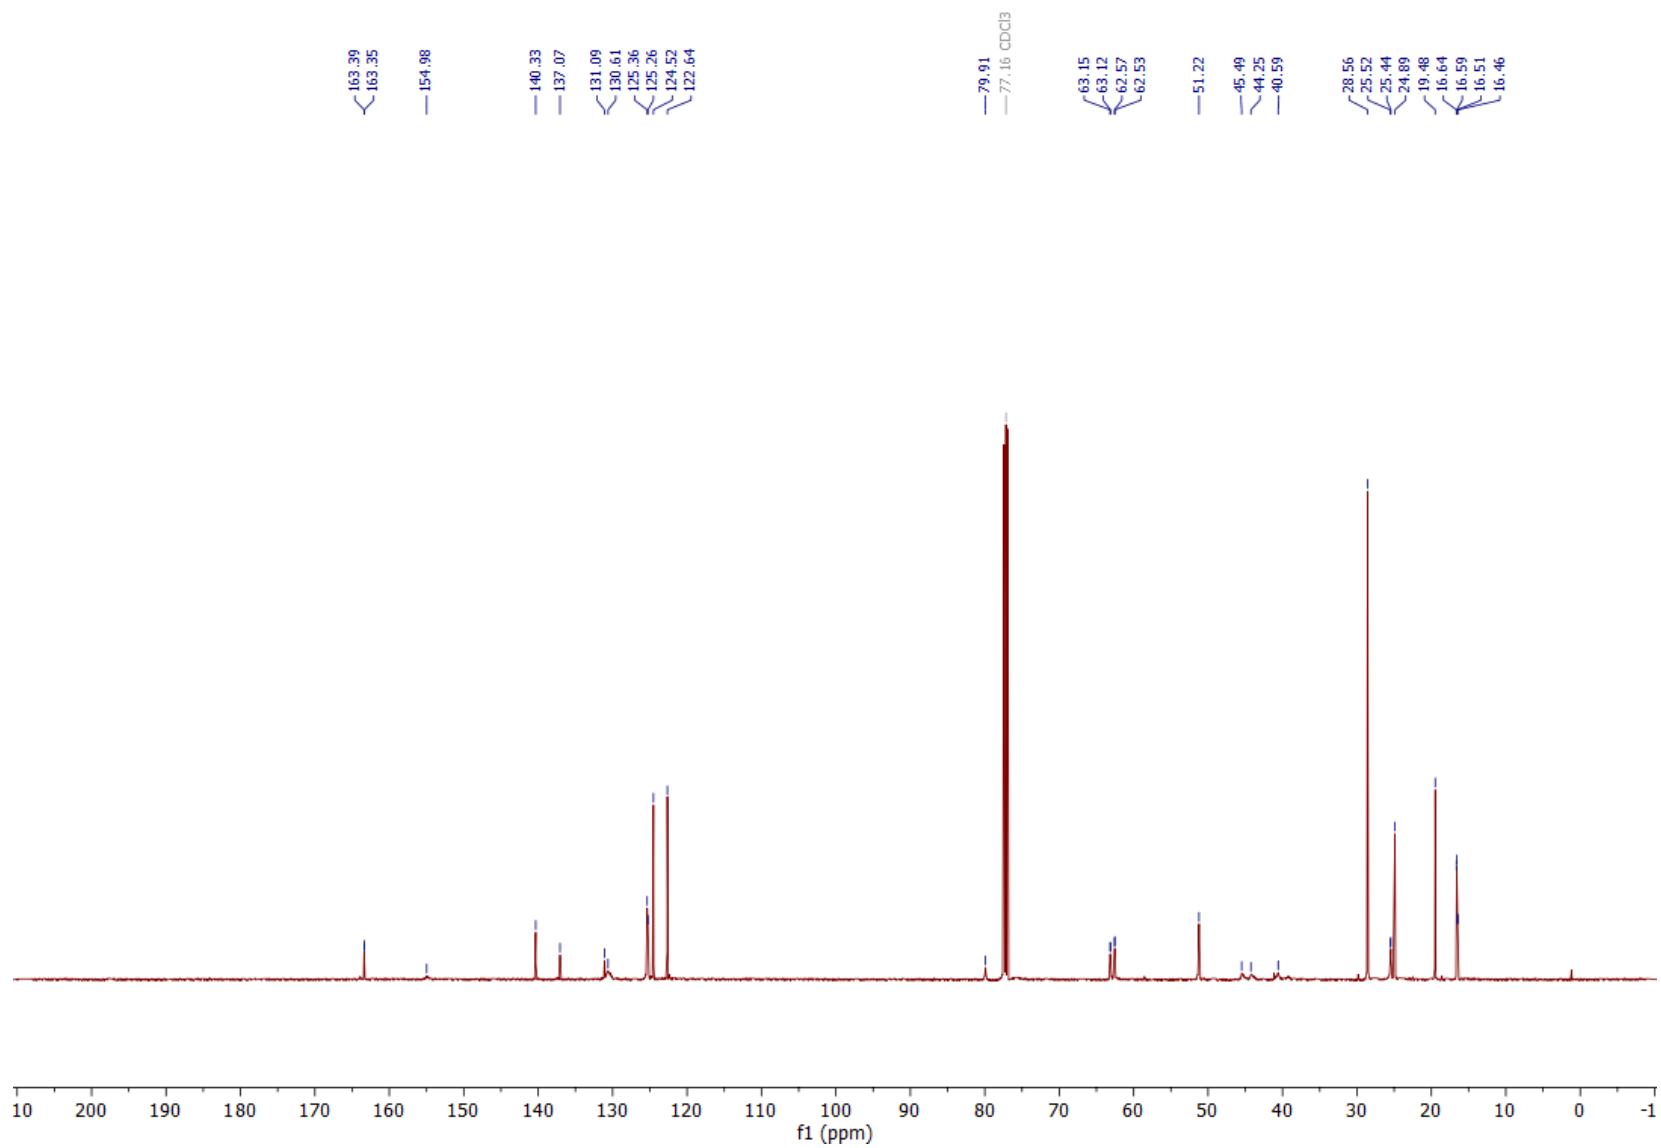

**Figure S56.**  $^{13}\text{C}$  NMR spectrum of **4h** diastereomer 1.



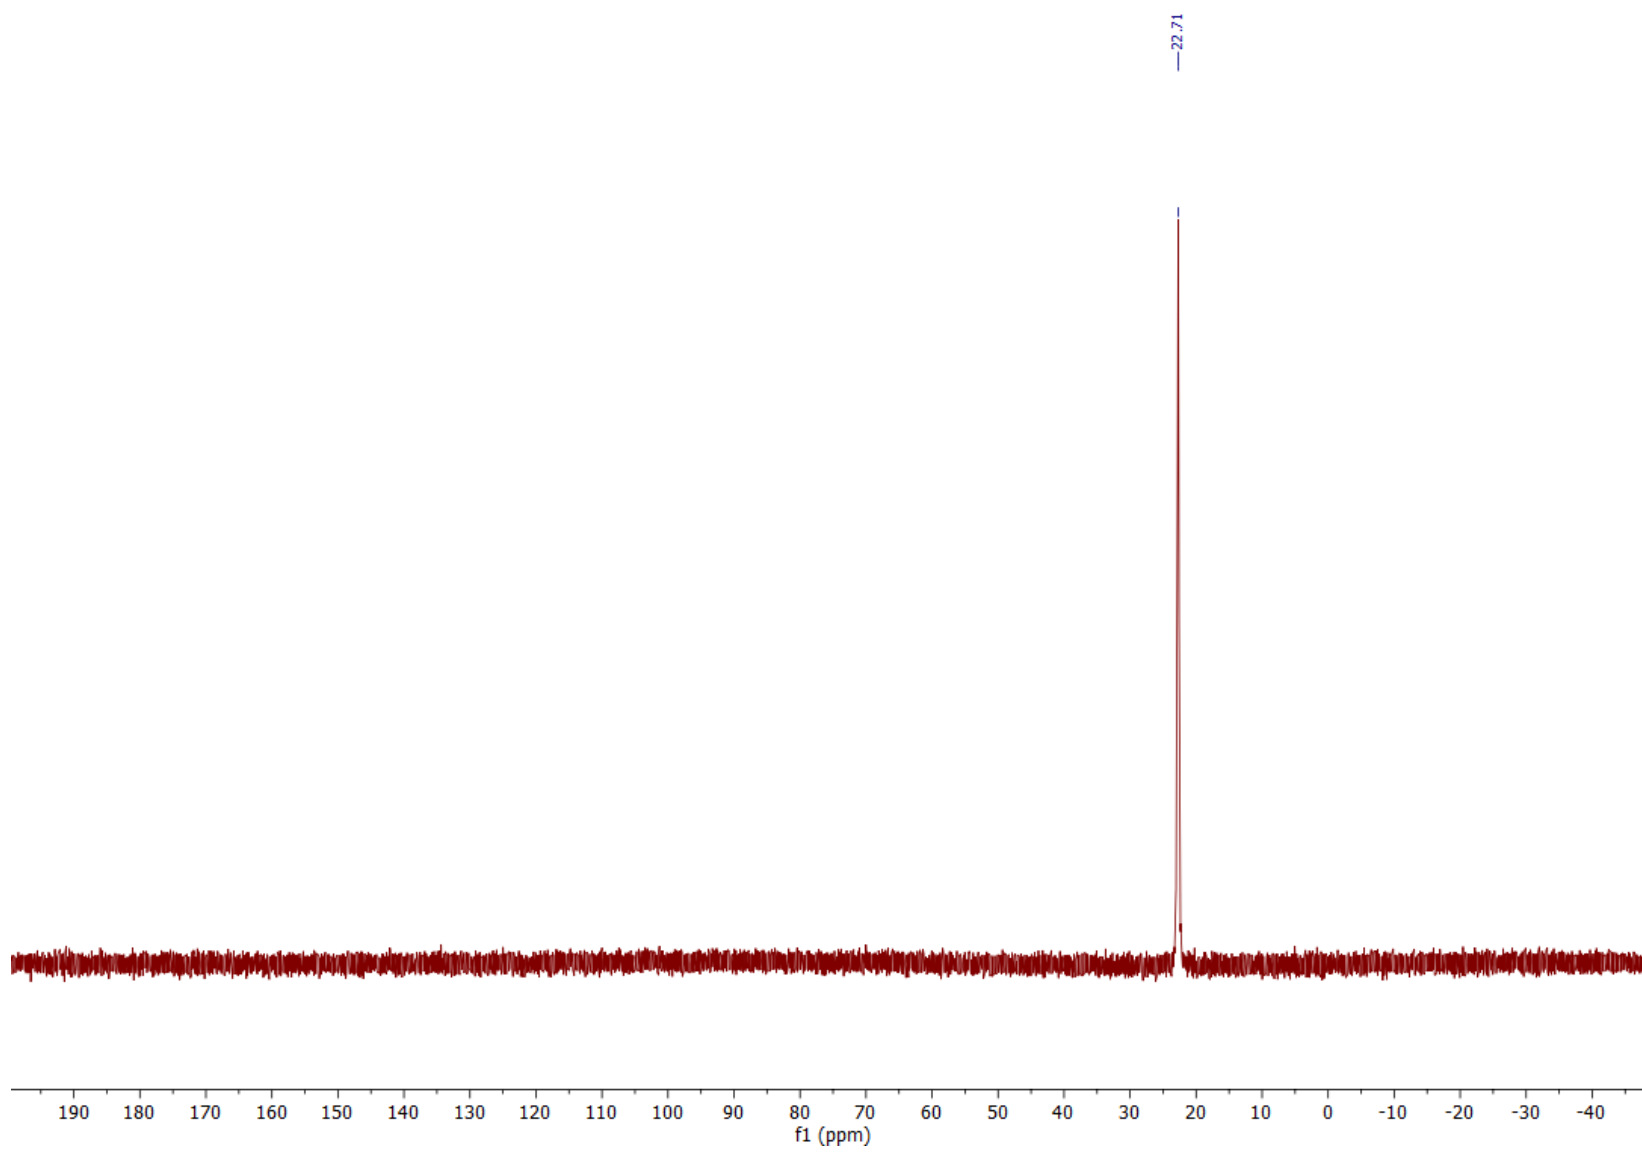

**Figure S57.**  $^{31}\text{P}$  NMR spectrum of **4h** diastereomer 1.

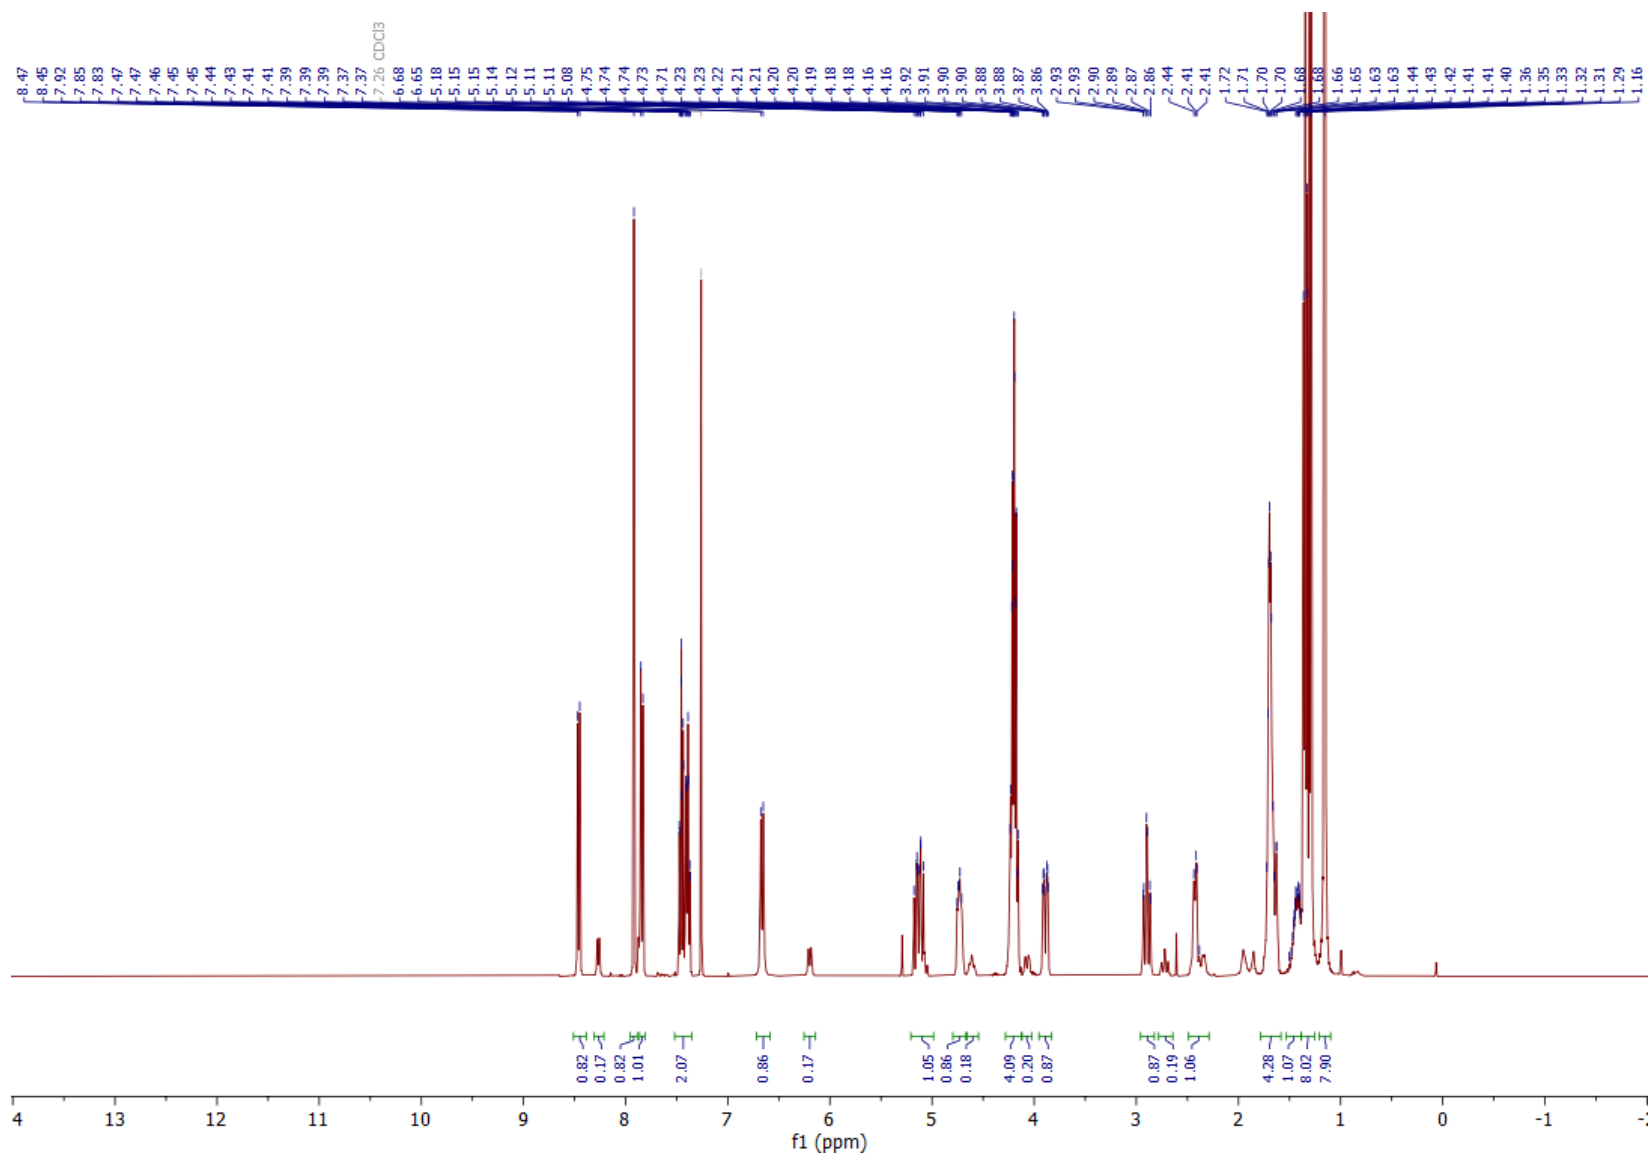

Figure S58. <sup>1</sup>H NMR spectrum of **4h** diastereomer 2.

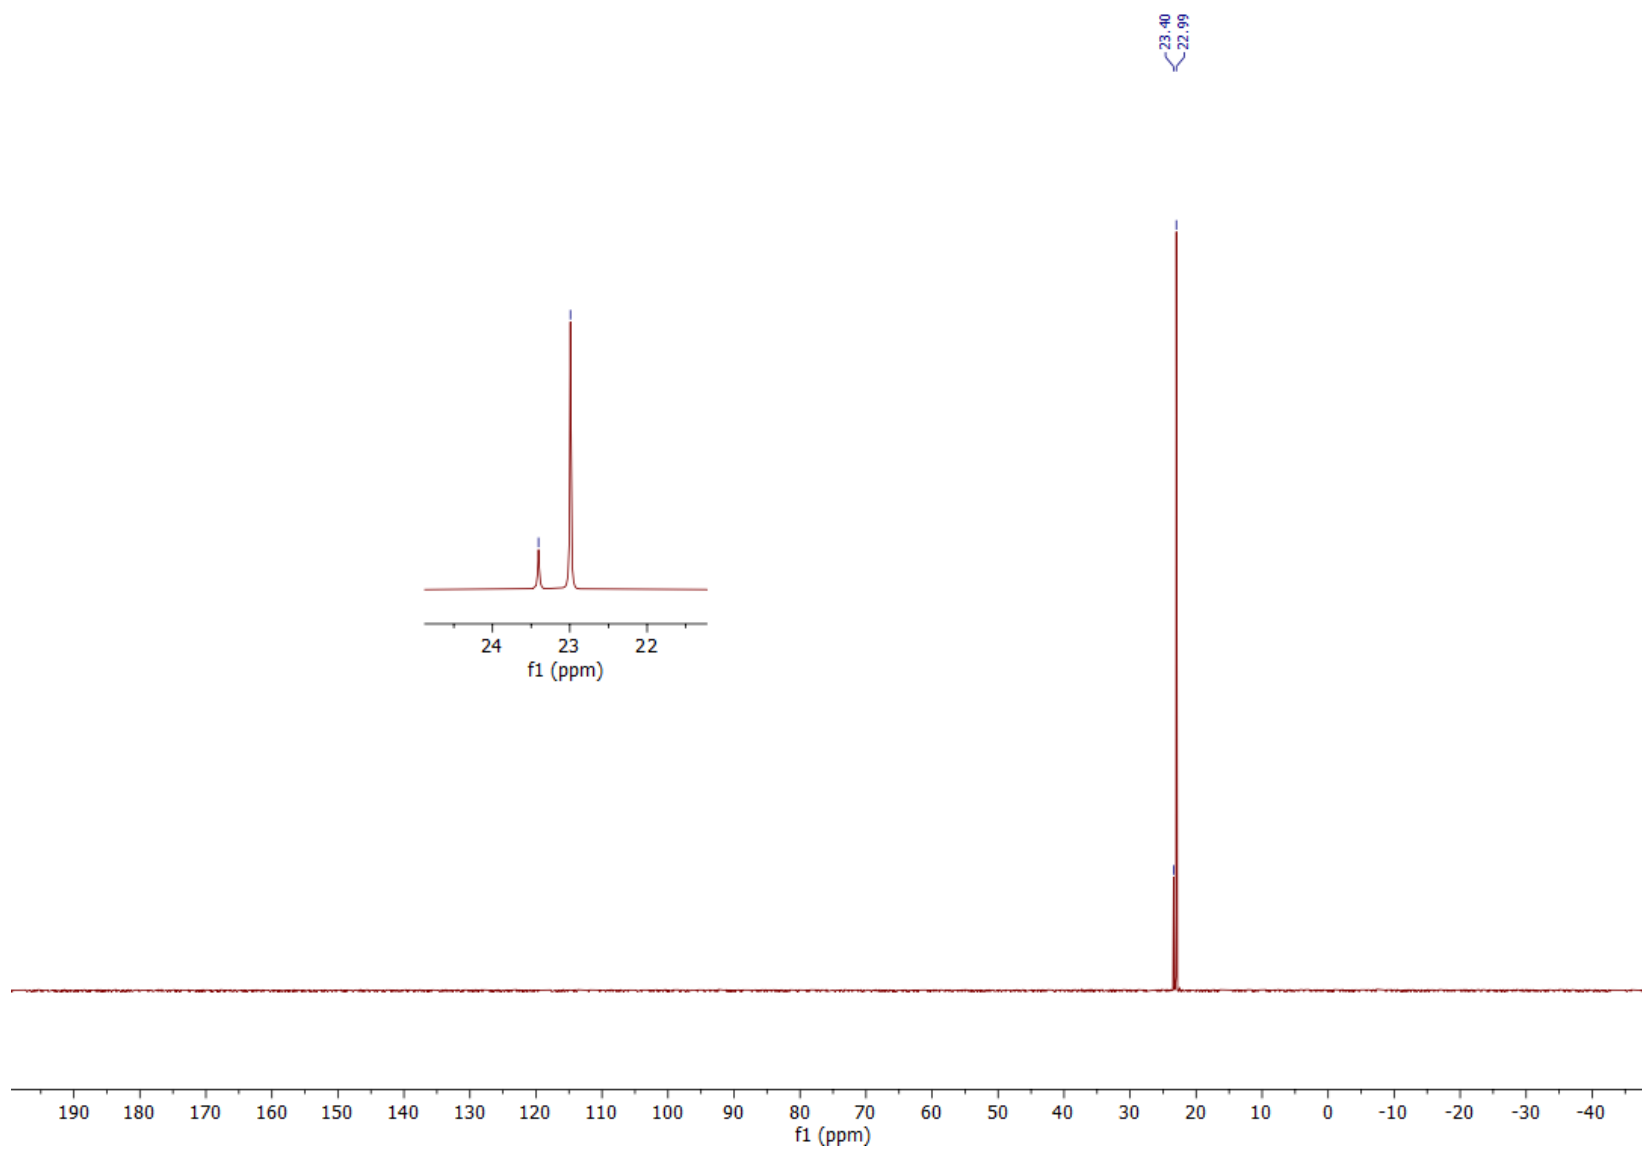

**Figure S59.**  $^{31}\text{P}$  NMR spectrum of **4h** diastereomer 2.

*Tert*-butyl 2-((diethoxyphosphoryl)(2-(thiophen-2-yl)acetamido)methyl)piperidine-1-carboxylate (**4i**)

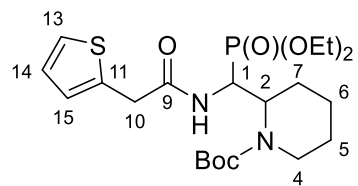

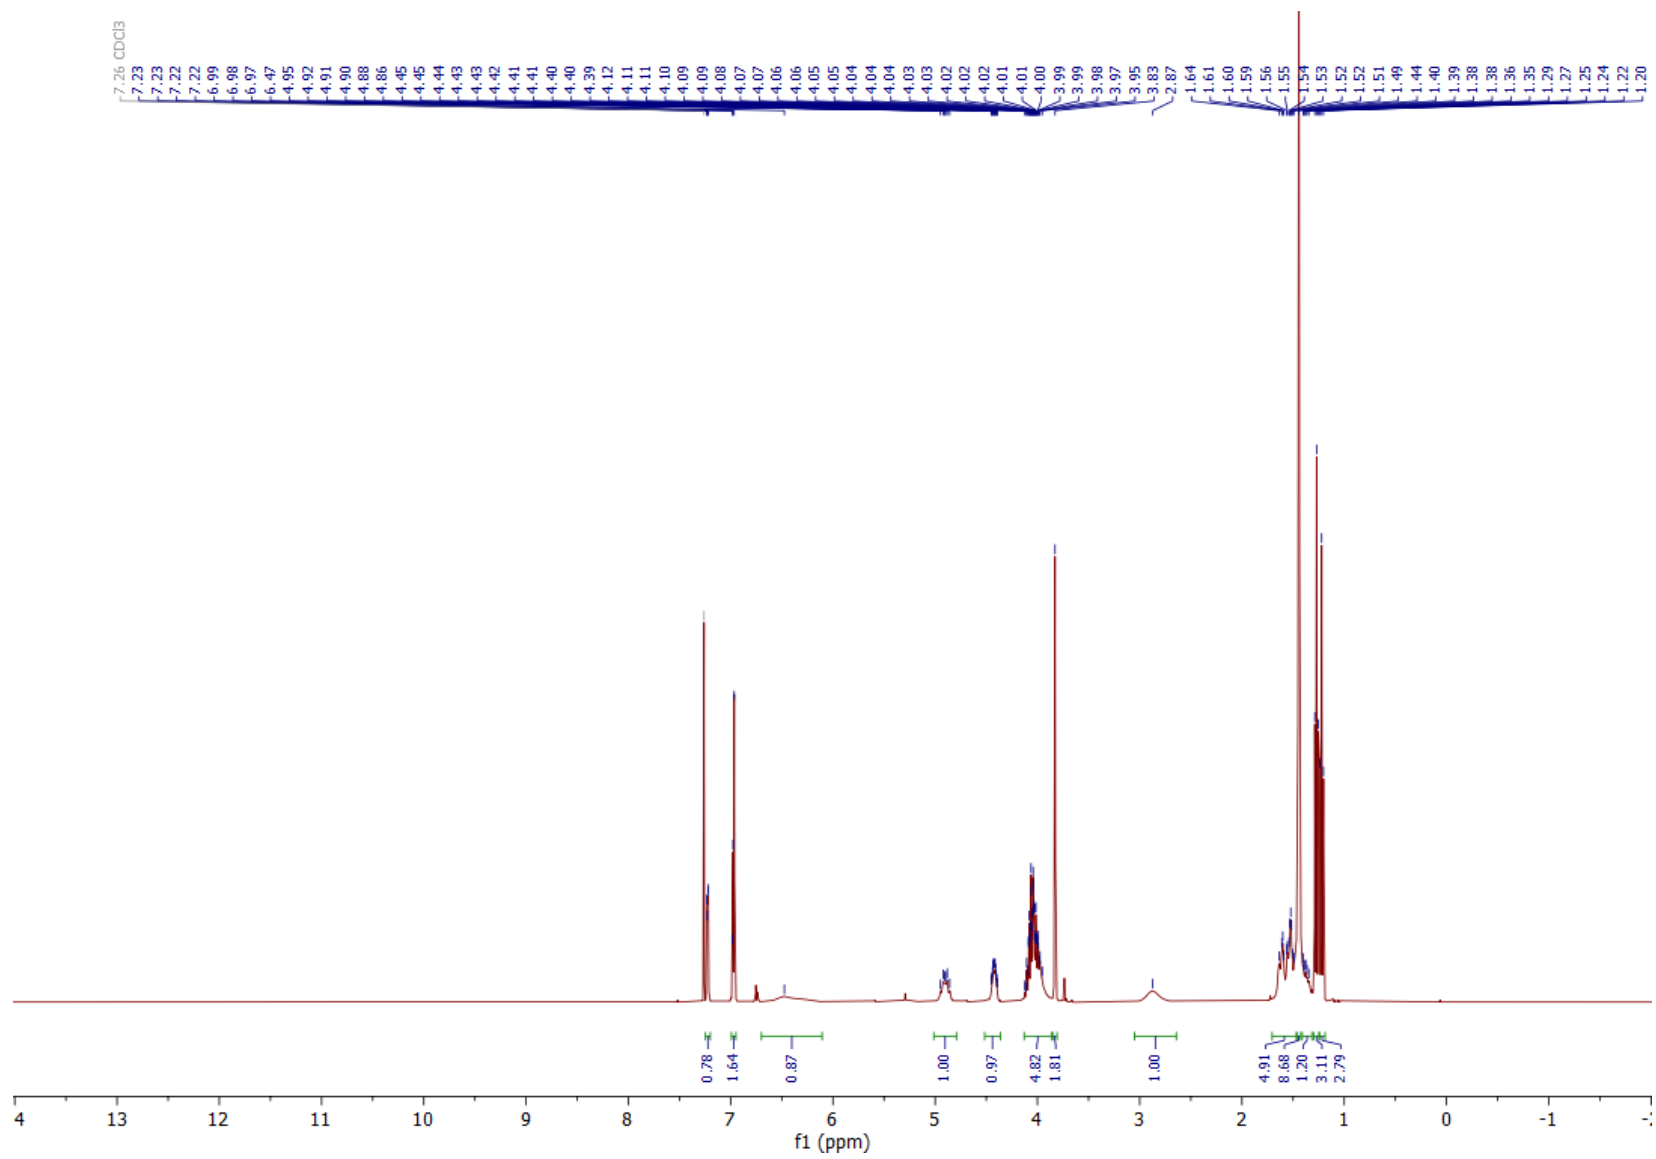

**Figure S60.** <sup>1</sup>H NMR spectrum of **4i** diastereomer 1.

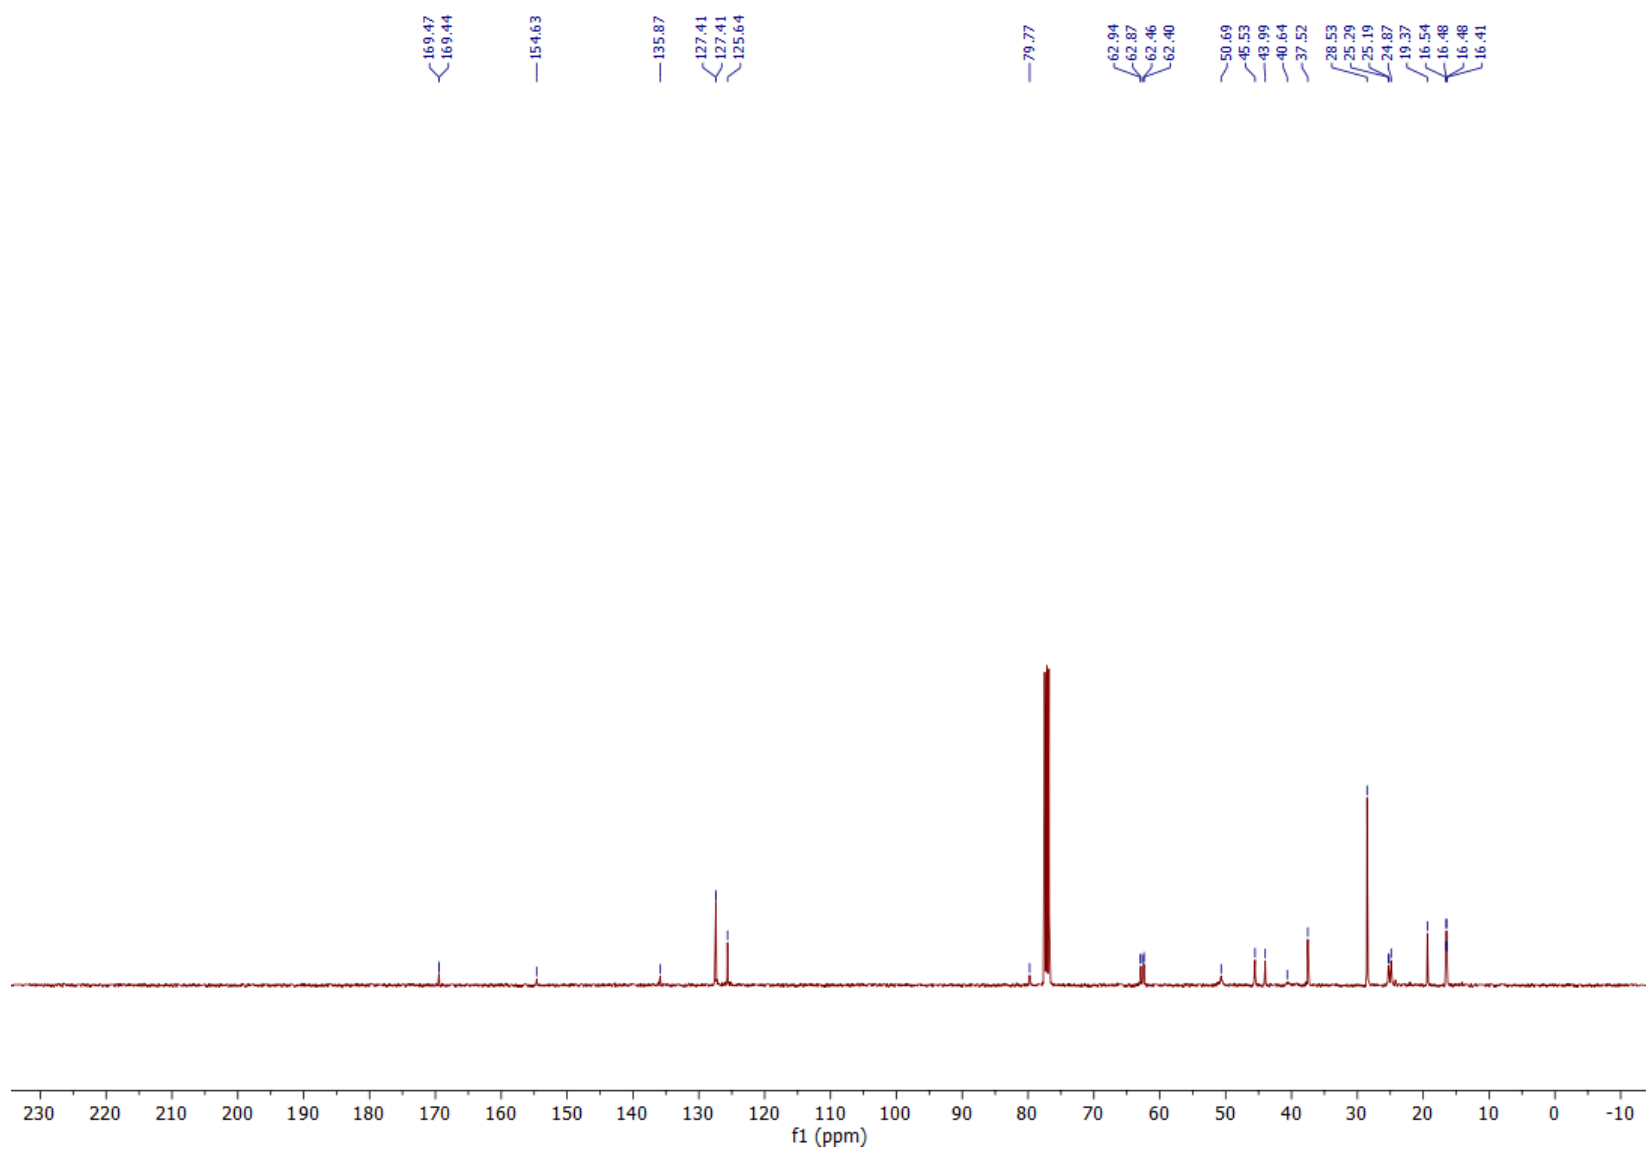

**Figure S61.** <sup>13</sup>C NMR spectrum of **4i** diastereomer 1.

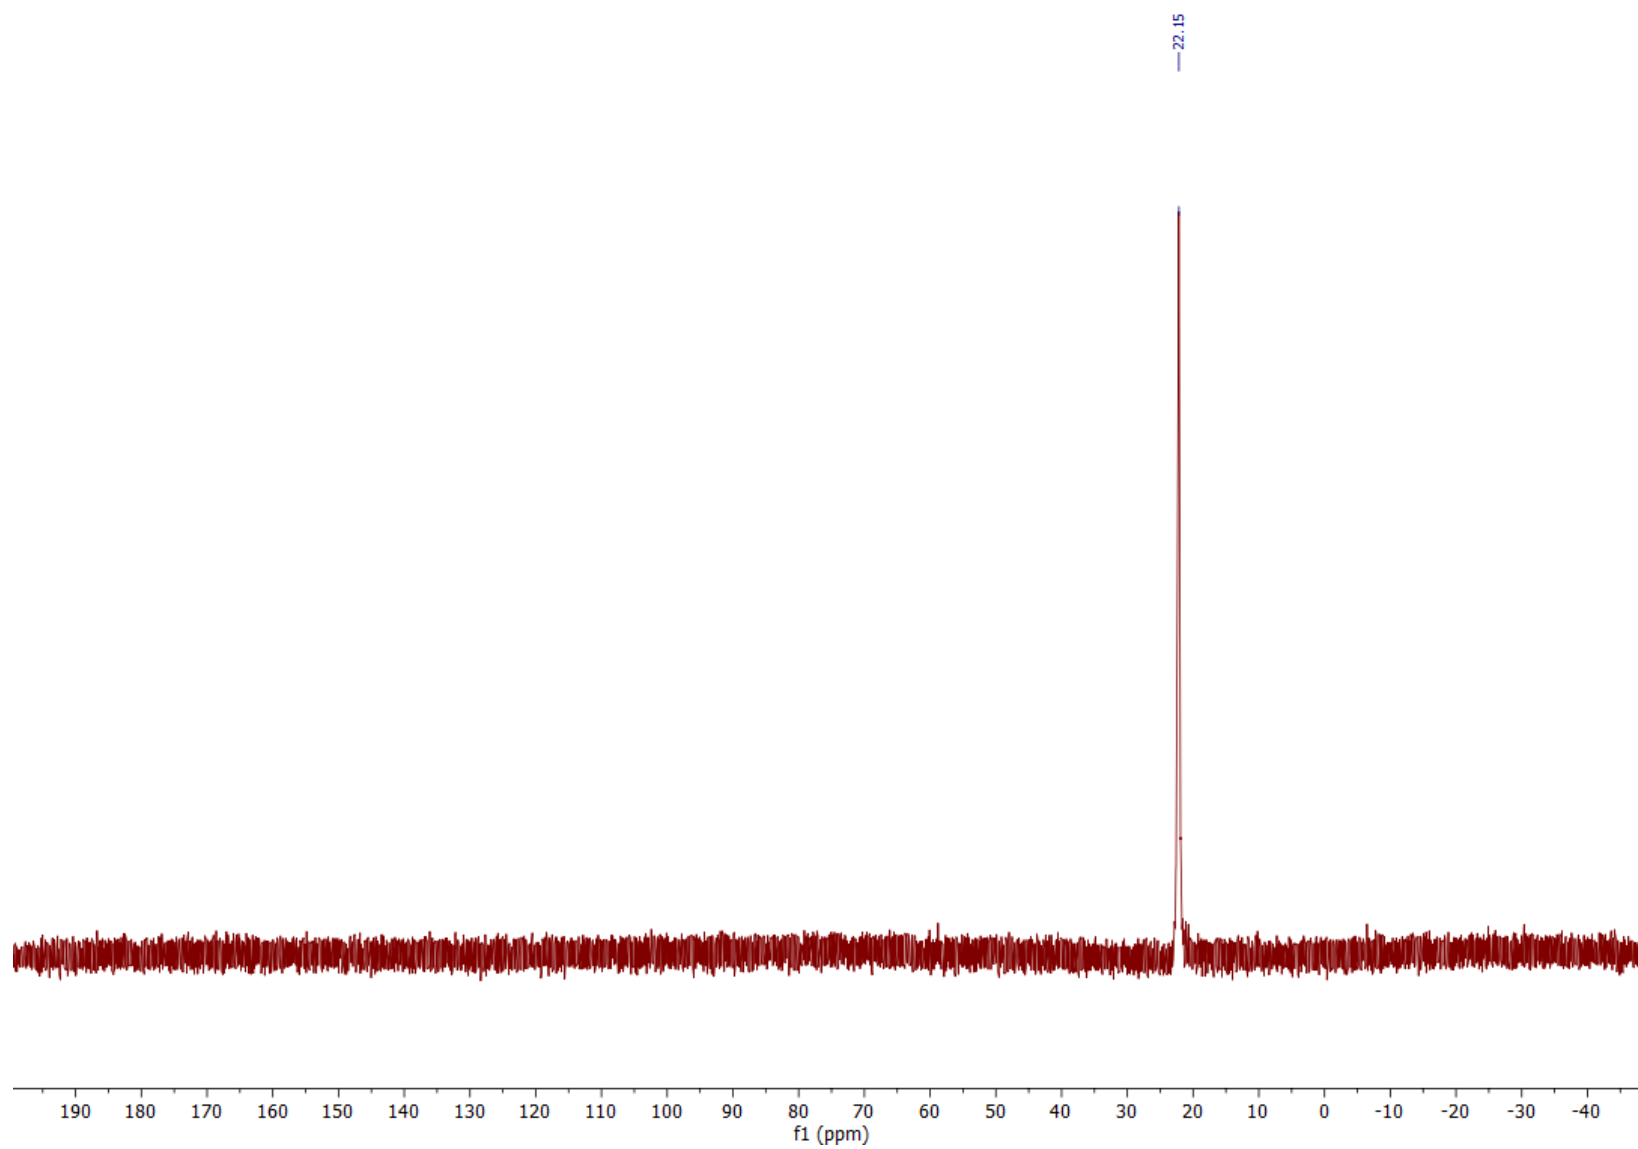

**Figure S62.**  $^{31}\text{P}$  NMR spectrum of **4i** diastereomer 1.

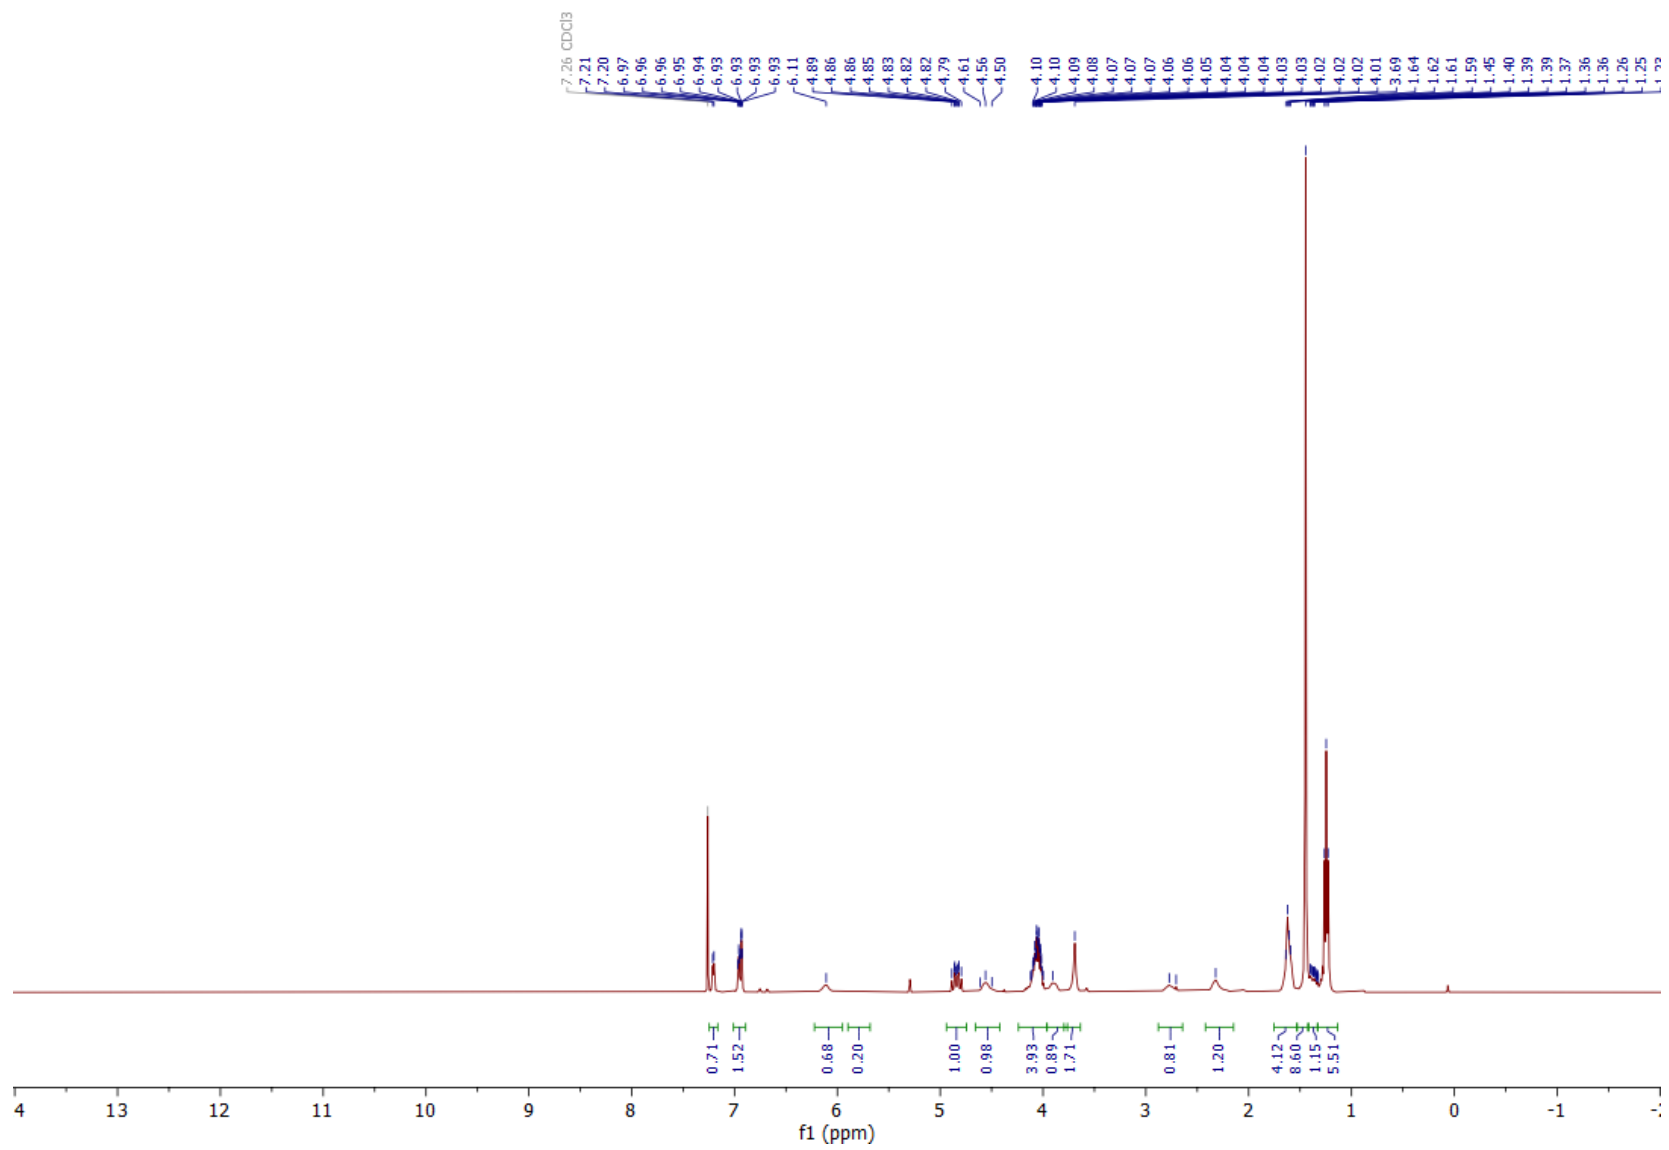

**Figure S63.**  $^1\text{H}$  NMR spectrum of **4i** diastereomer 2.



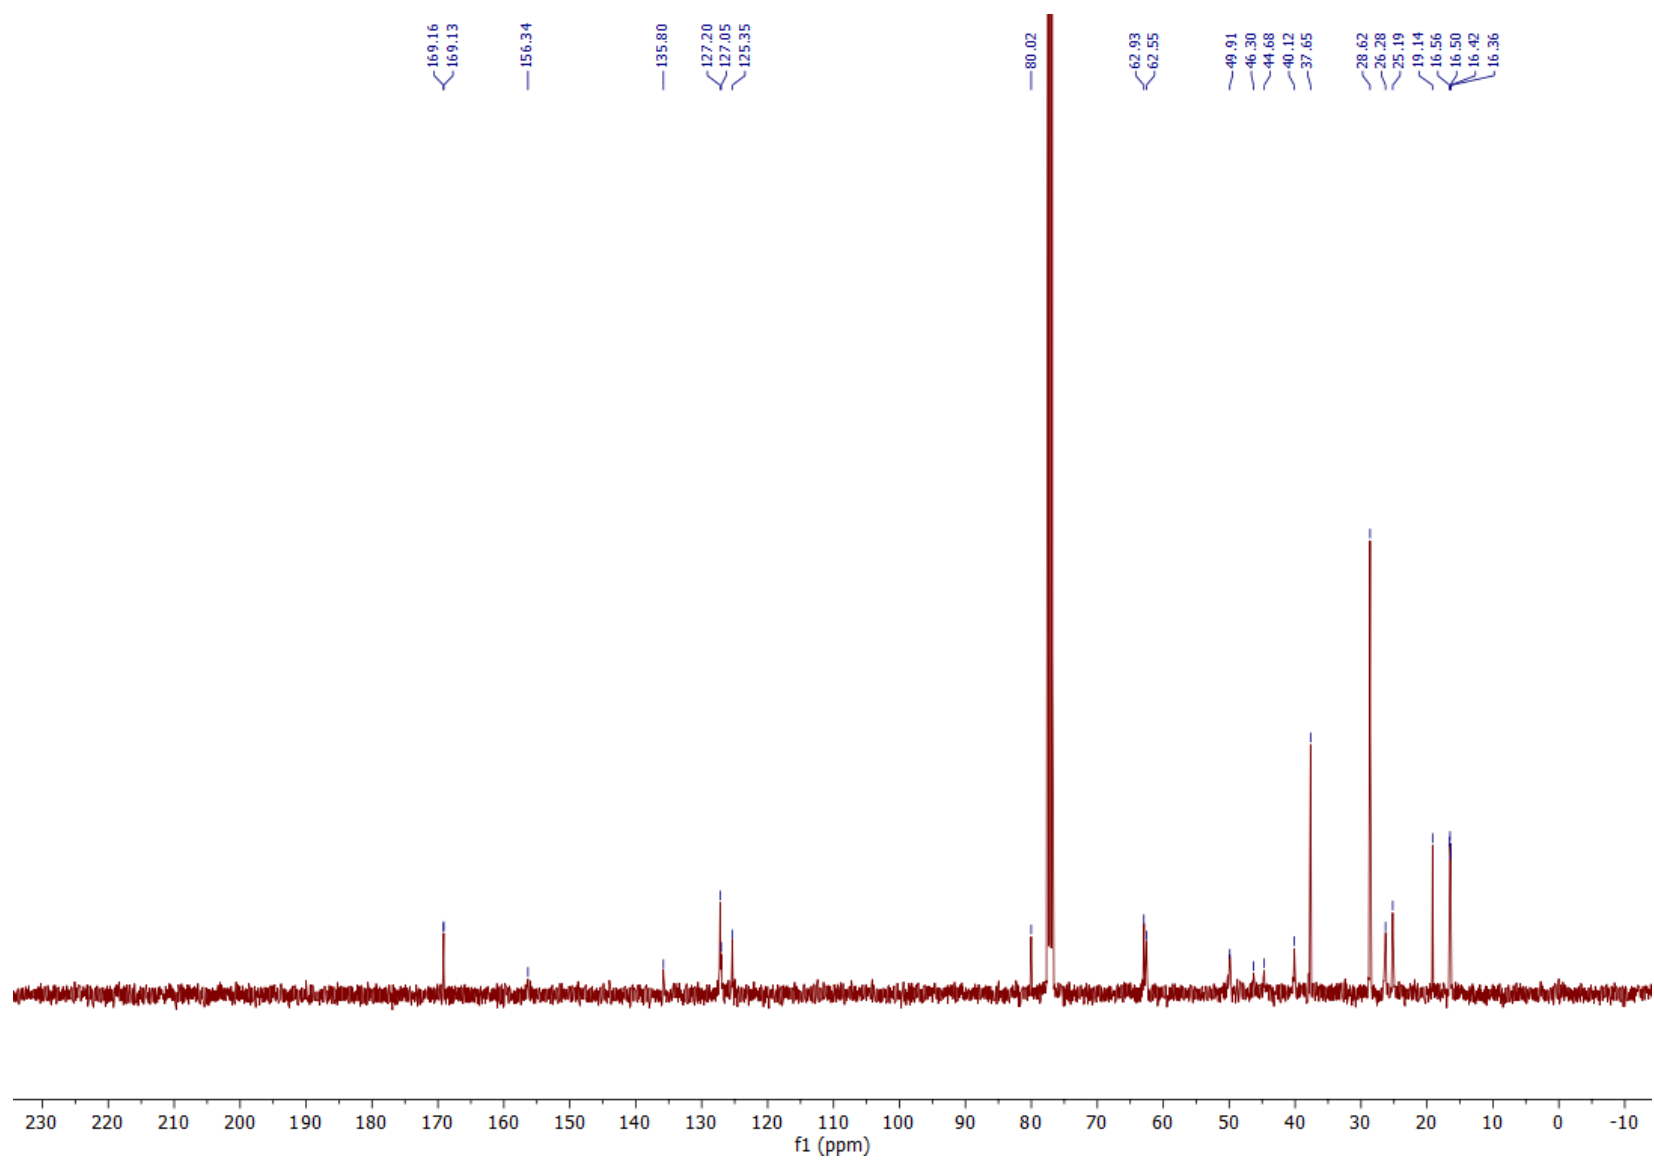

**Figure S64.** <sup>13</sup>C NMR spectrum of **4i** diastereomer 2.

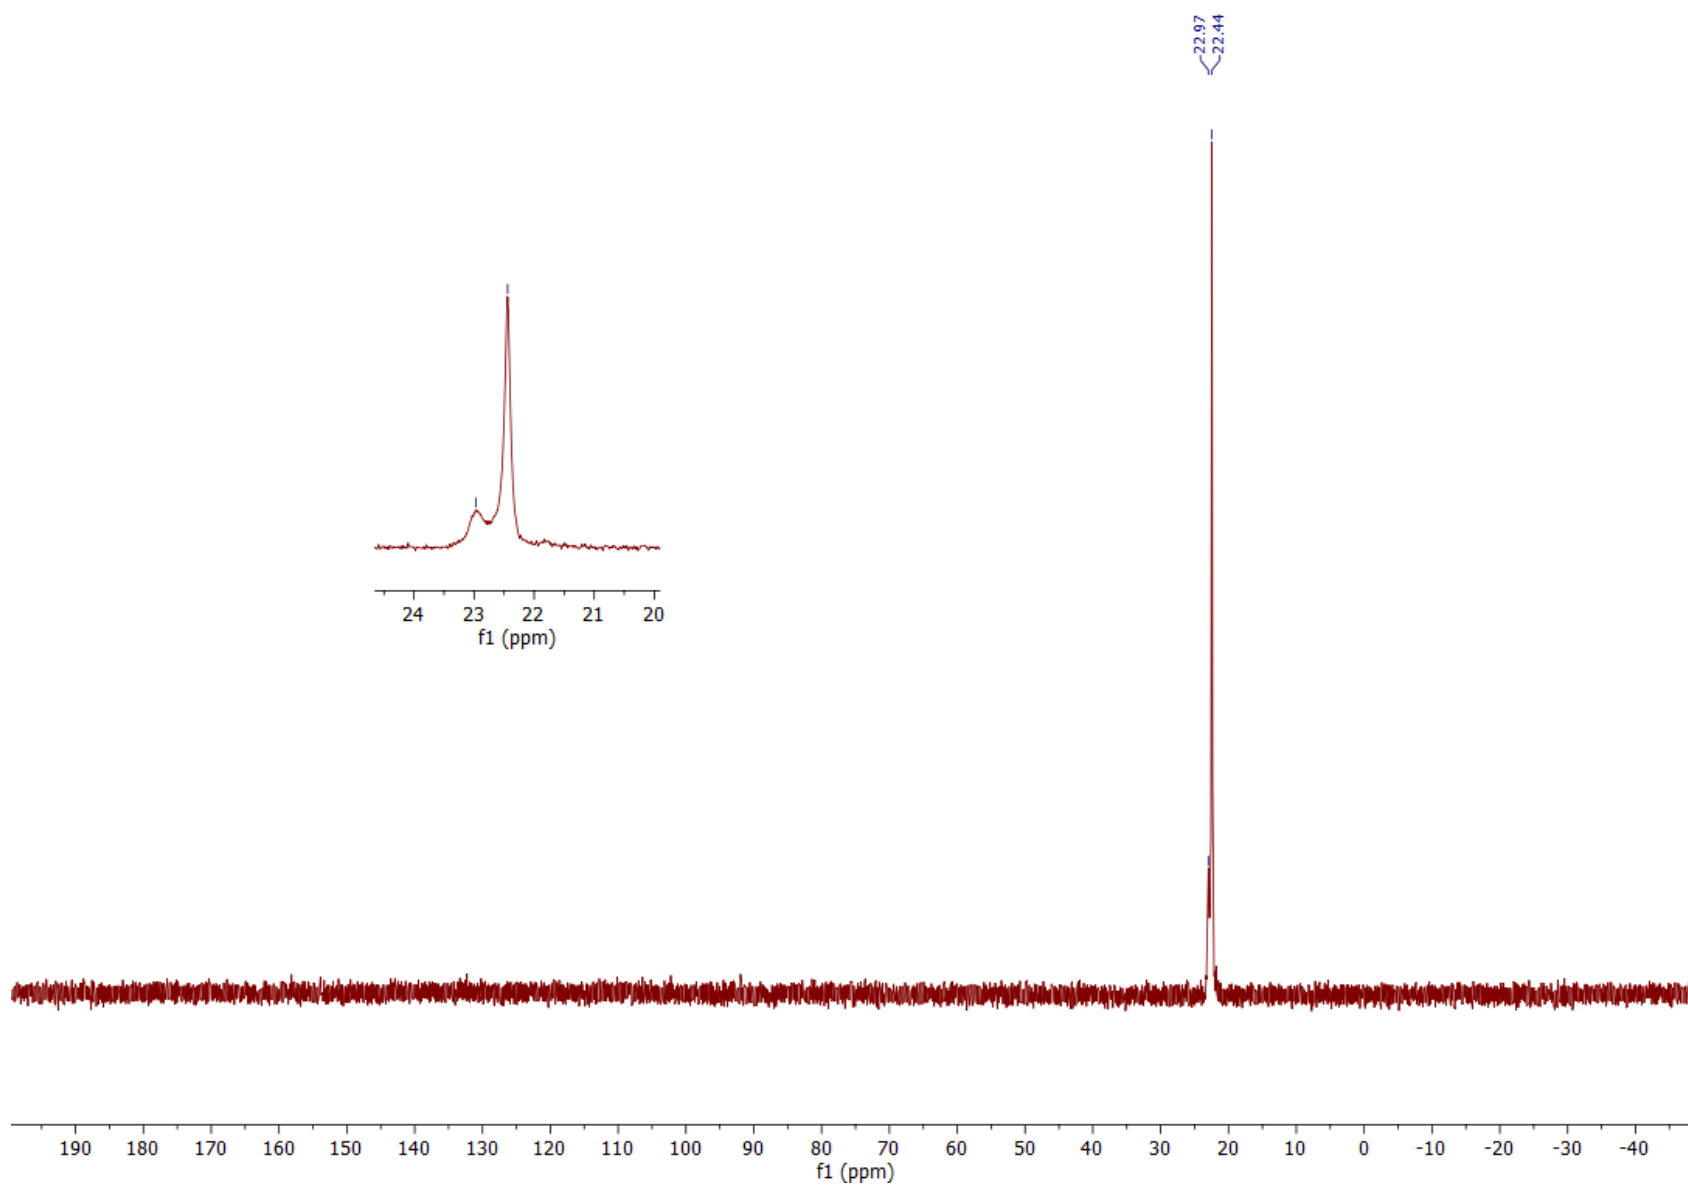

**Figure S65.**  $^{31}\text{P}$  NMR spectrum of **4i** diastereomer 2.

*Tert*-butyl 2-((diethoxyphosphoryl)(2-(thiophen-3-yl)acetamido)methyl)piperidine-1-carboxylate (**4j**)

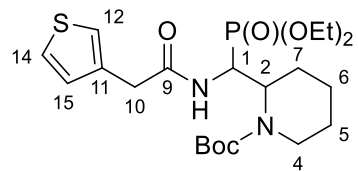



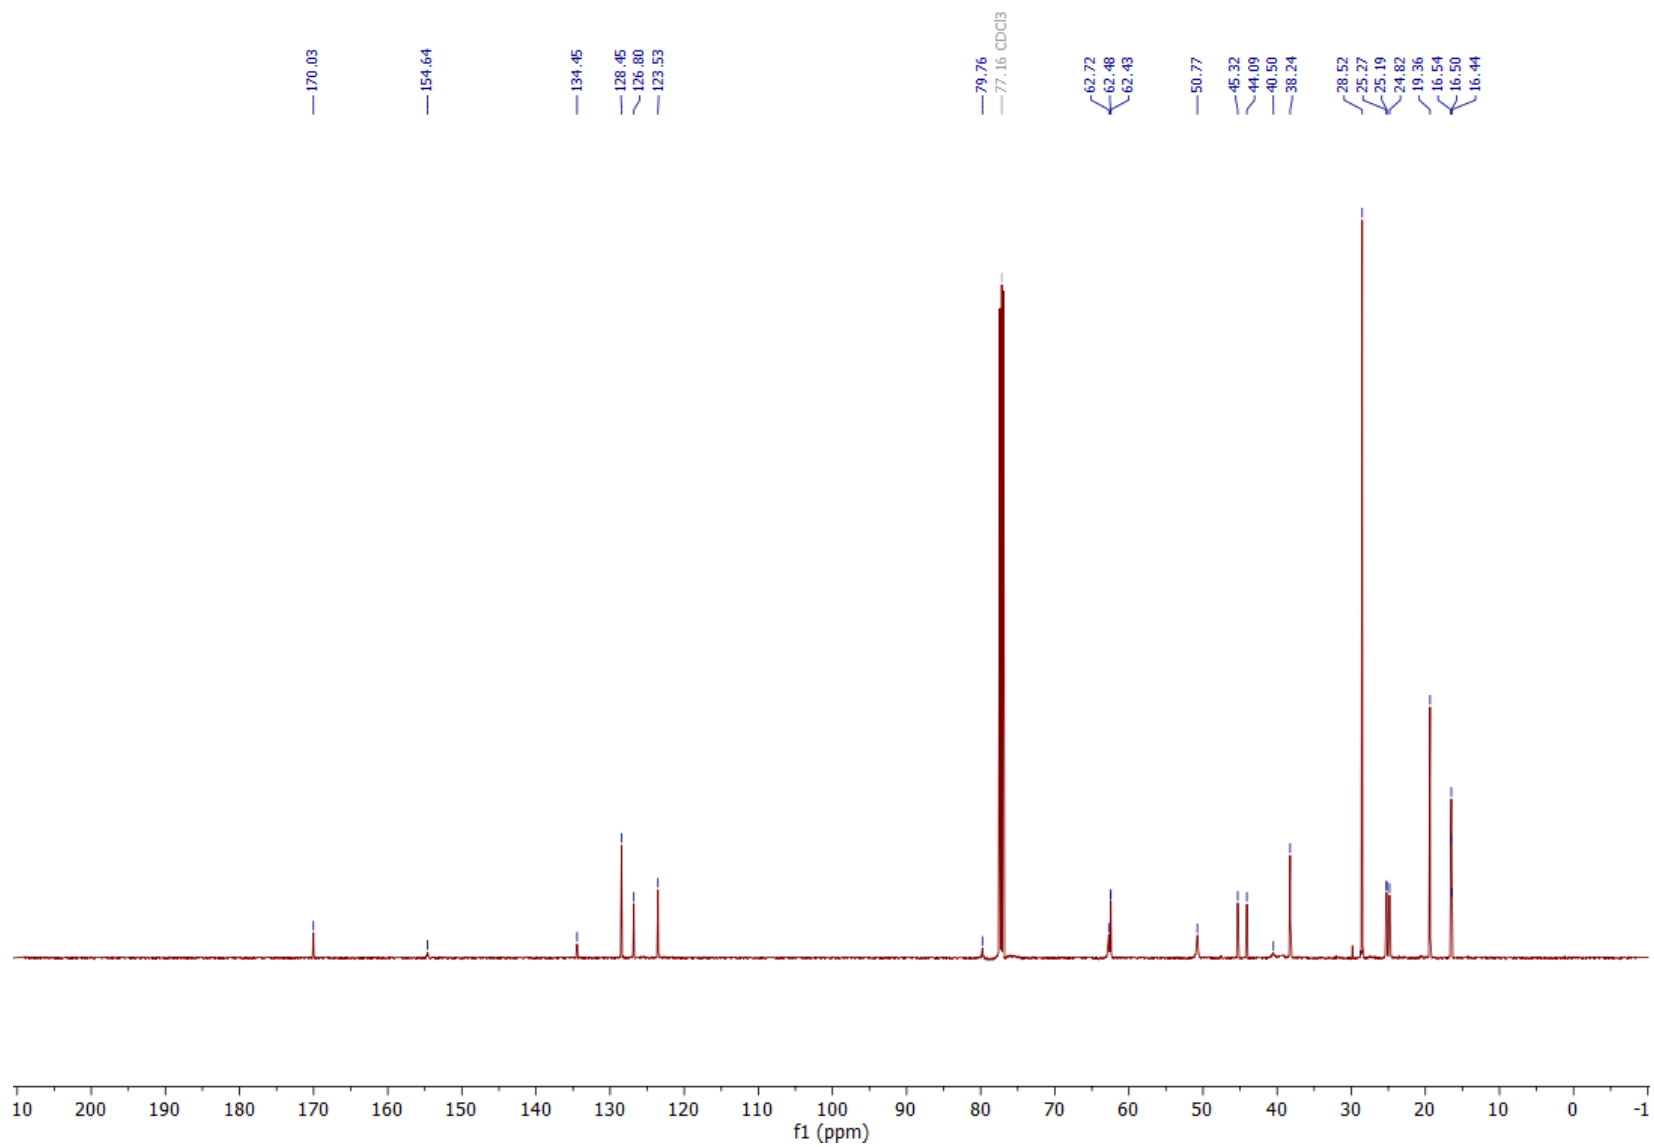

**Figure S67.** <sup>13</sup>C NMR spectrum of **4j** diastereomer 1.

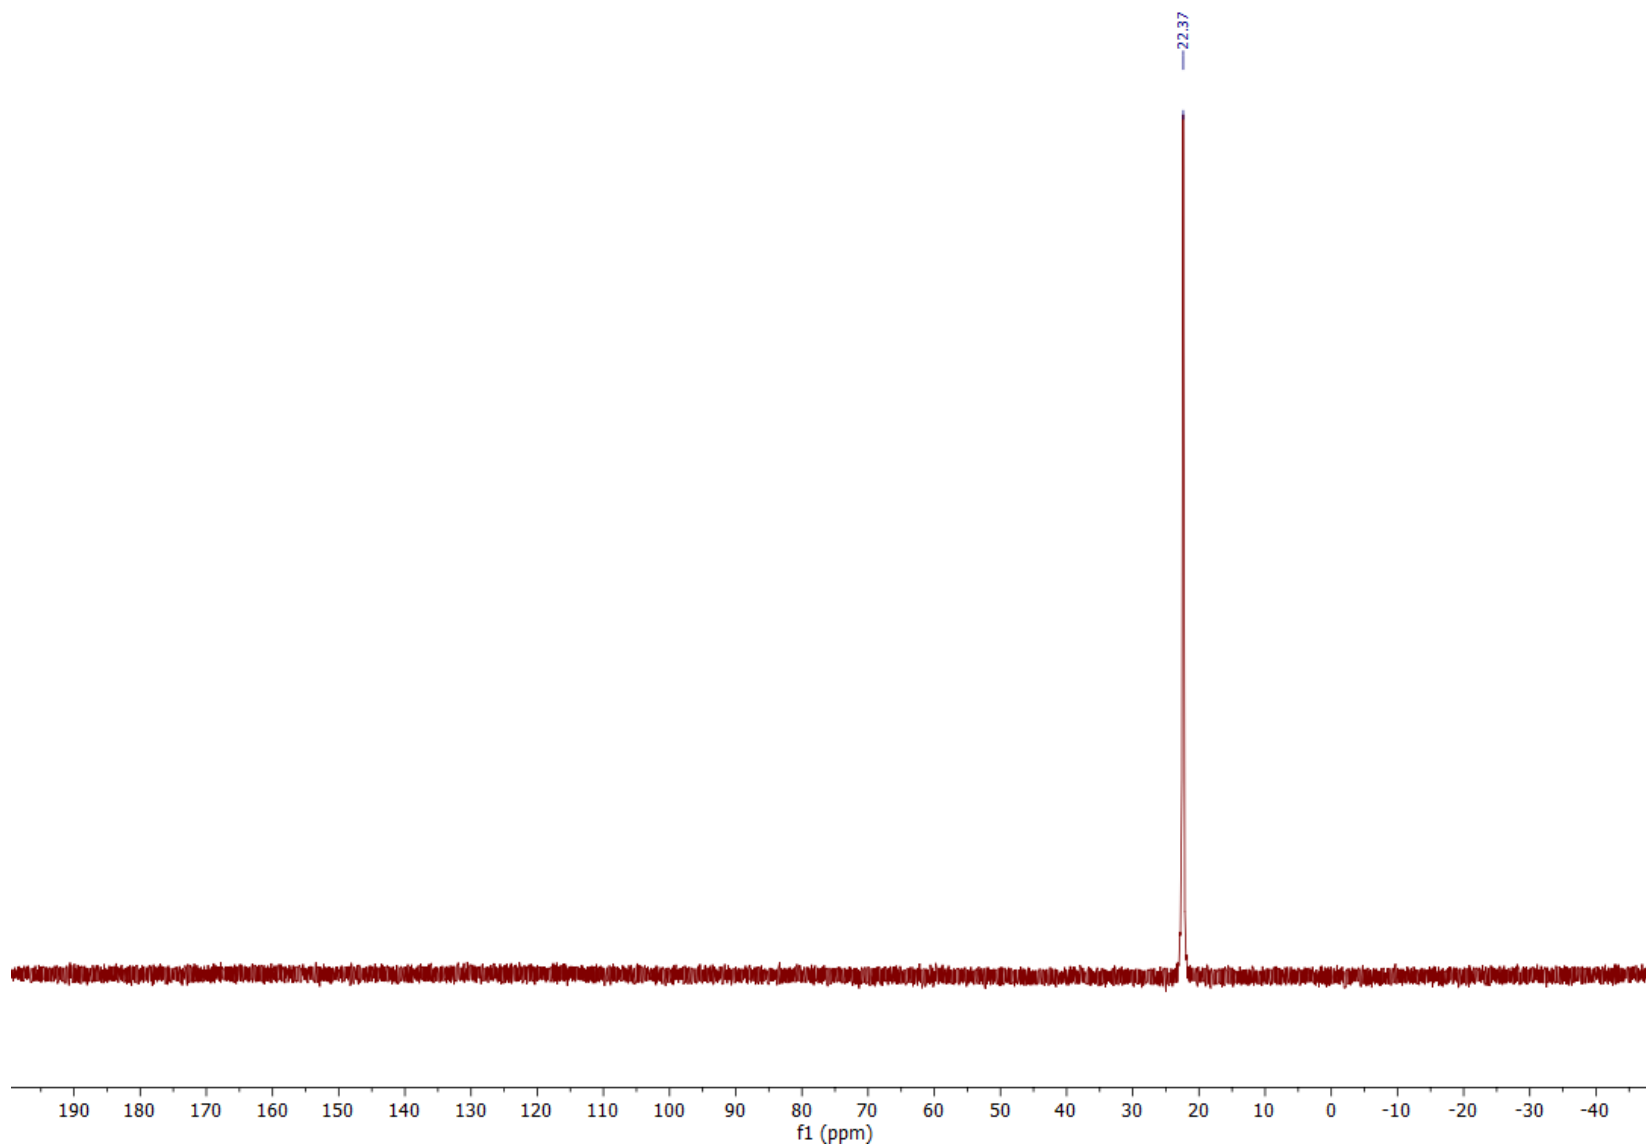

**Figure S68.**  $^{31}\text{P}$  NMR spectrum of **4j** diastereomer 1.

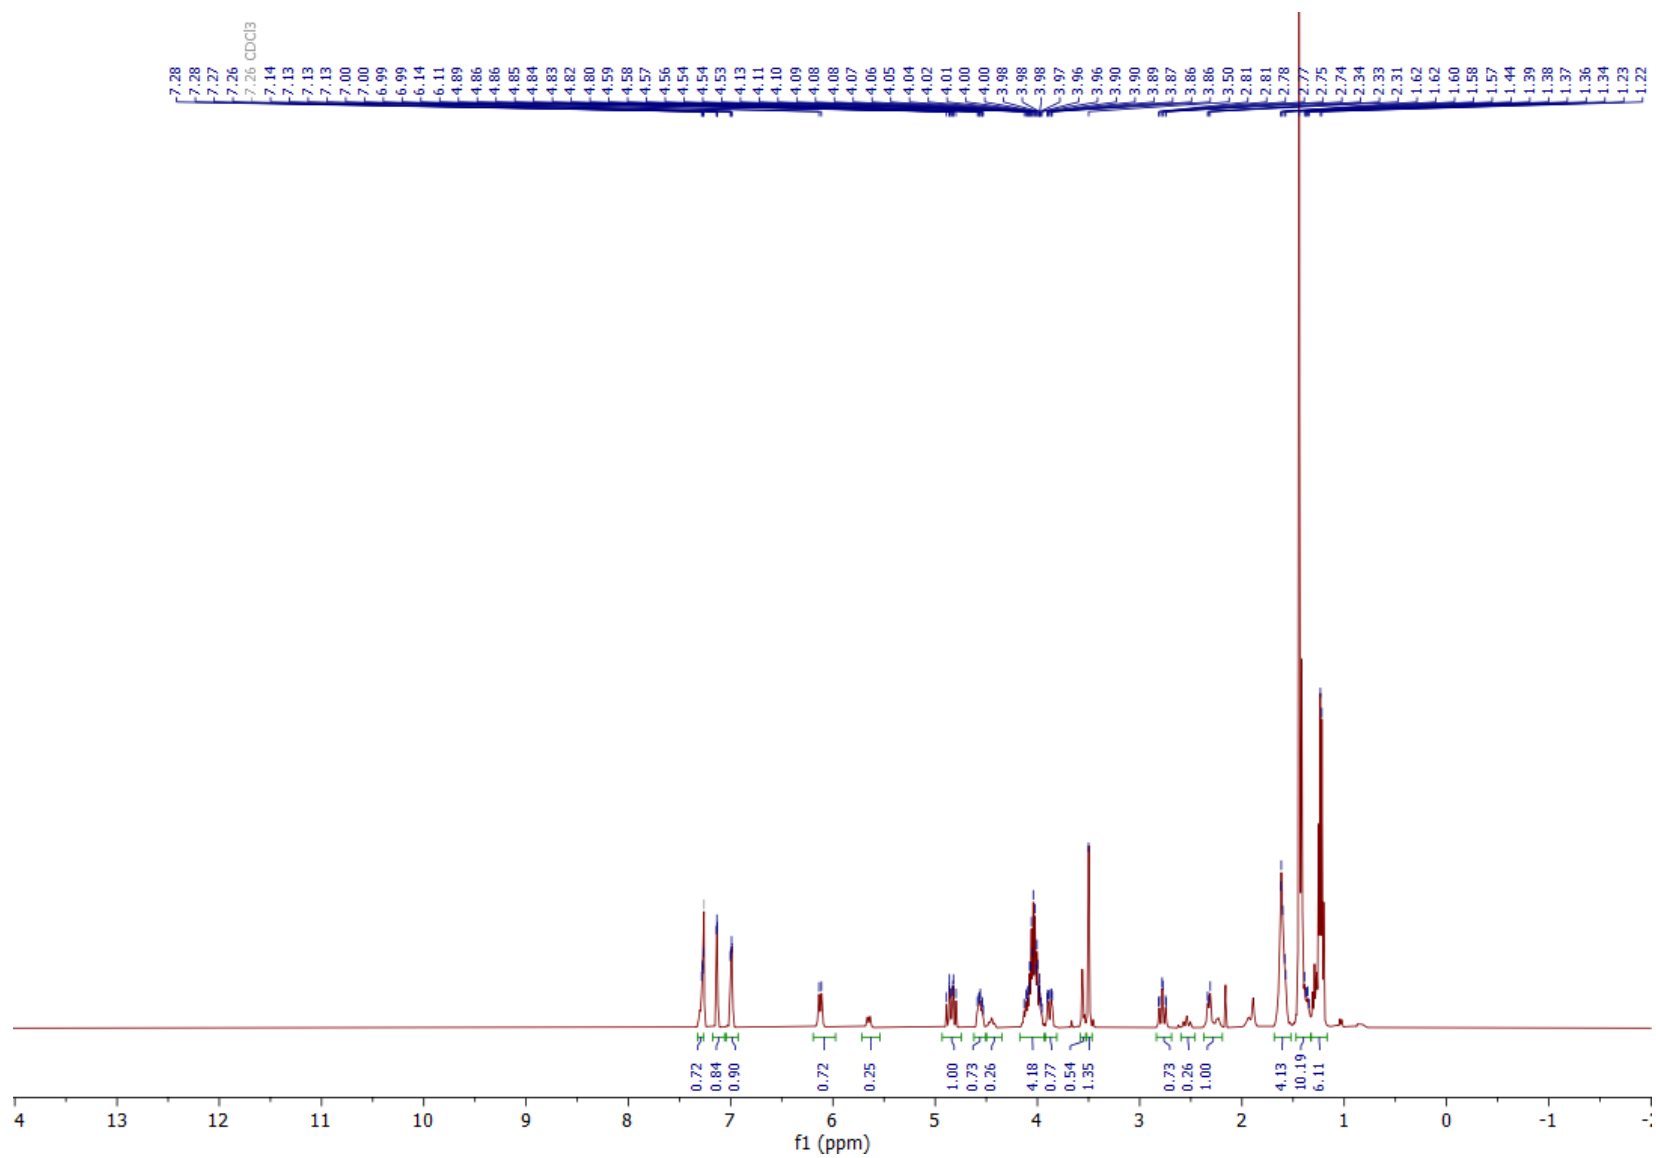

Figure S69.  $^1\text{H}$  NMR spectrum of **4j** diastereomer **2**.

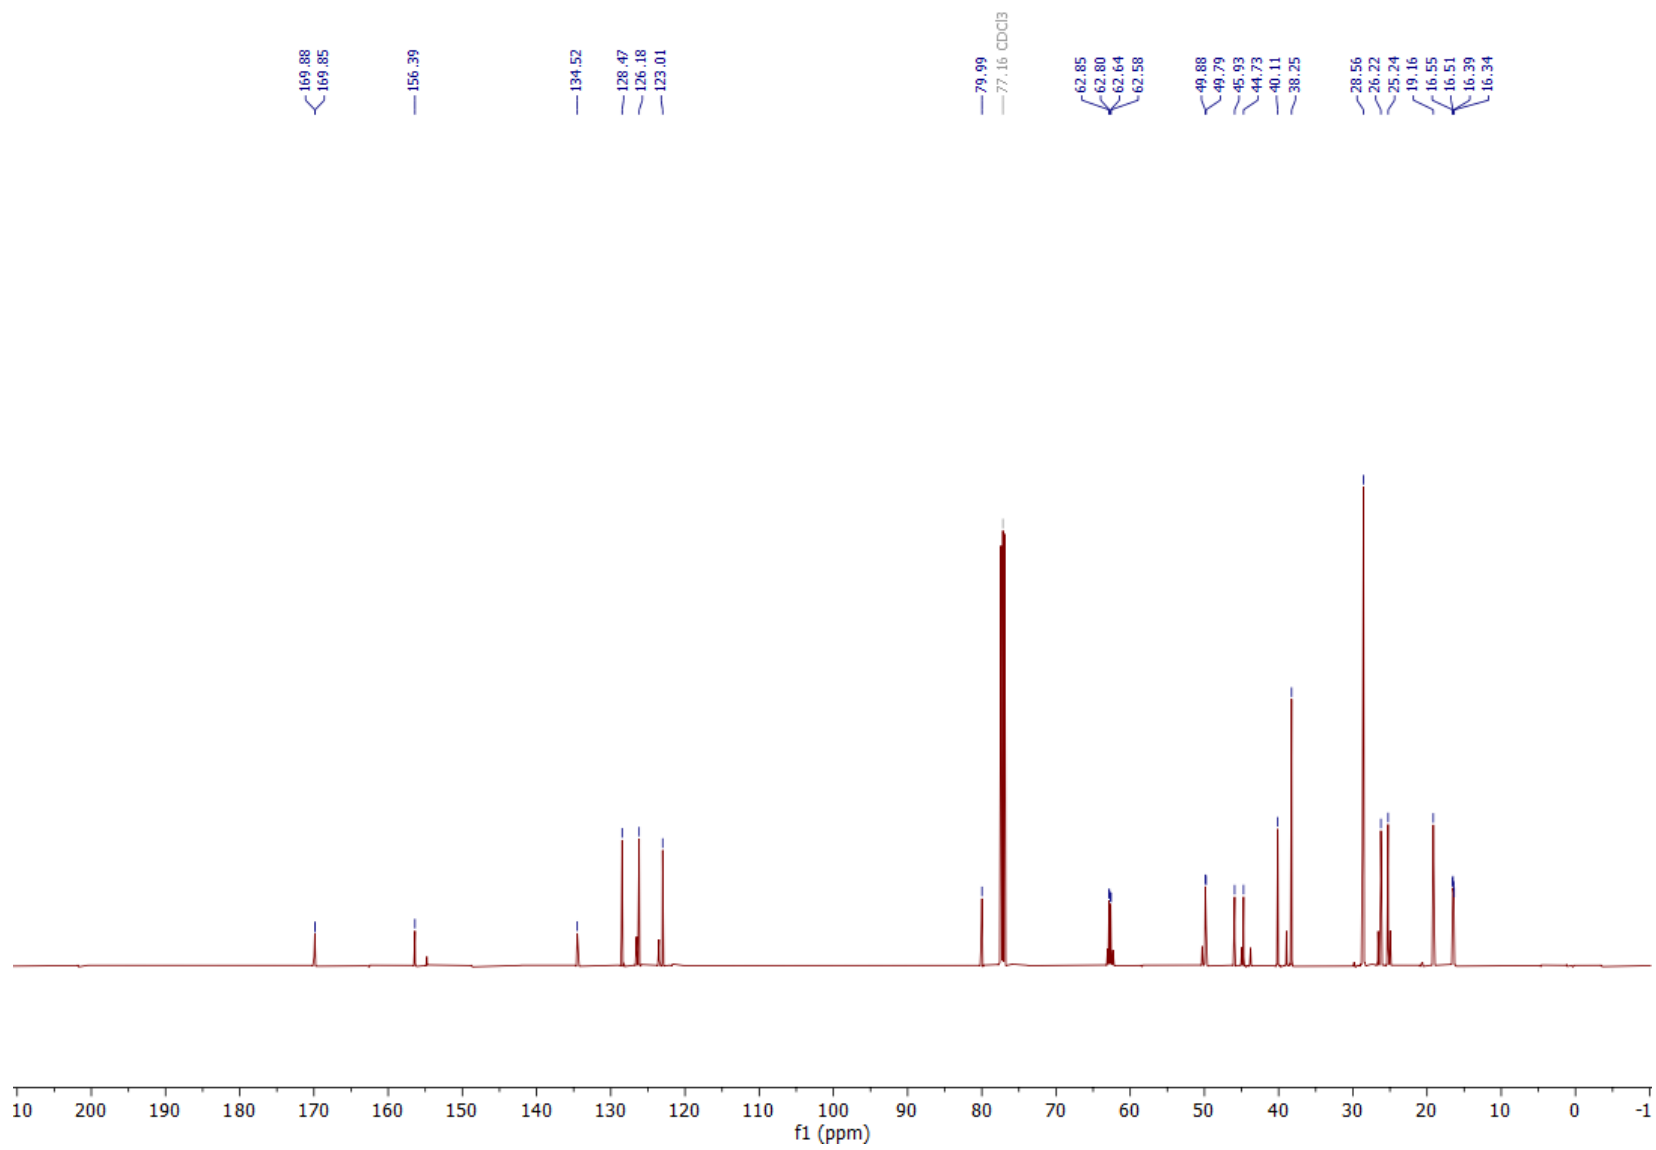

**Figure S70.** <sup>13</sup>C NMR spectrum of **4j** diastereomer 2.



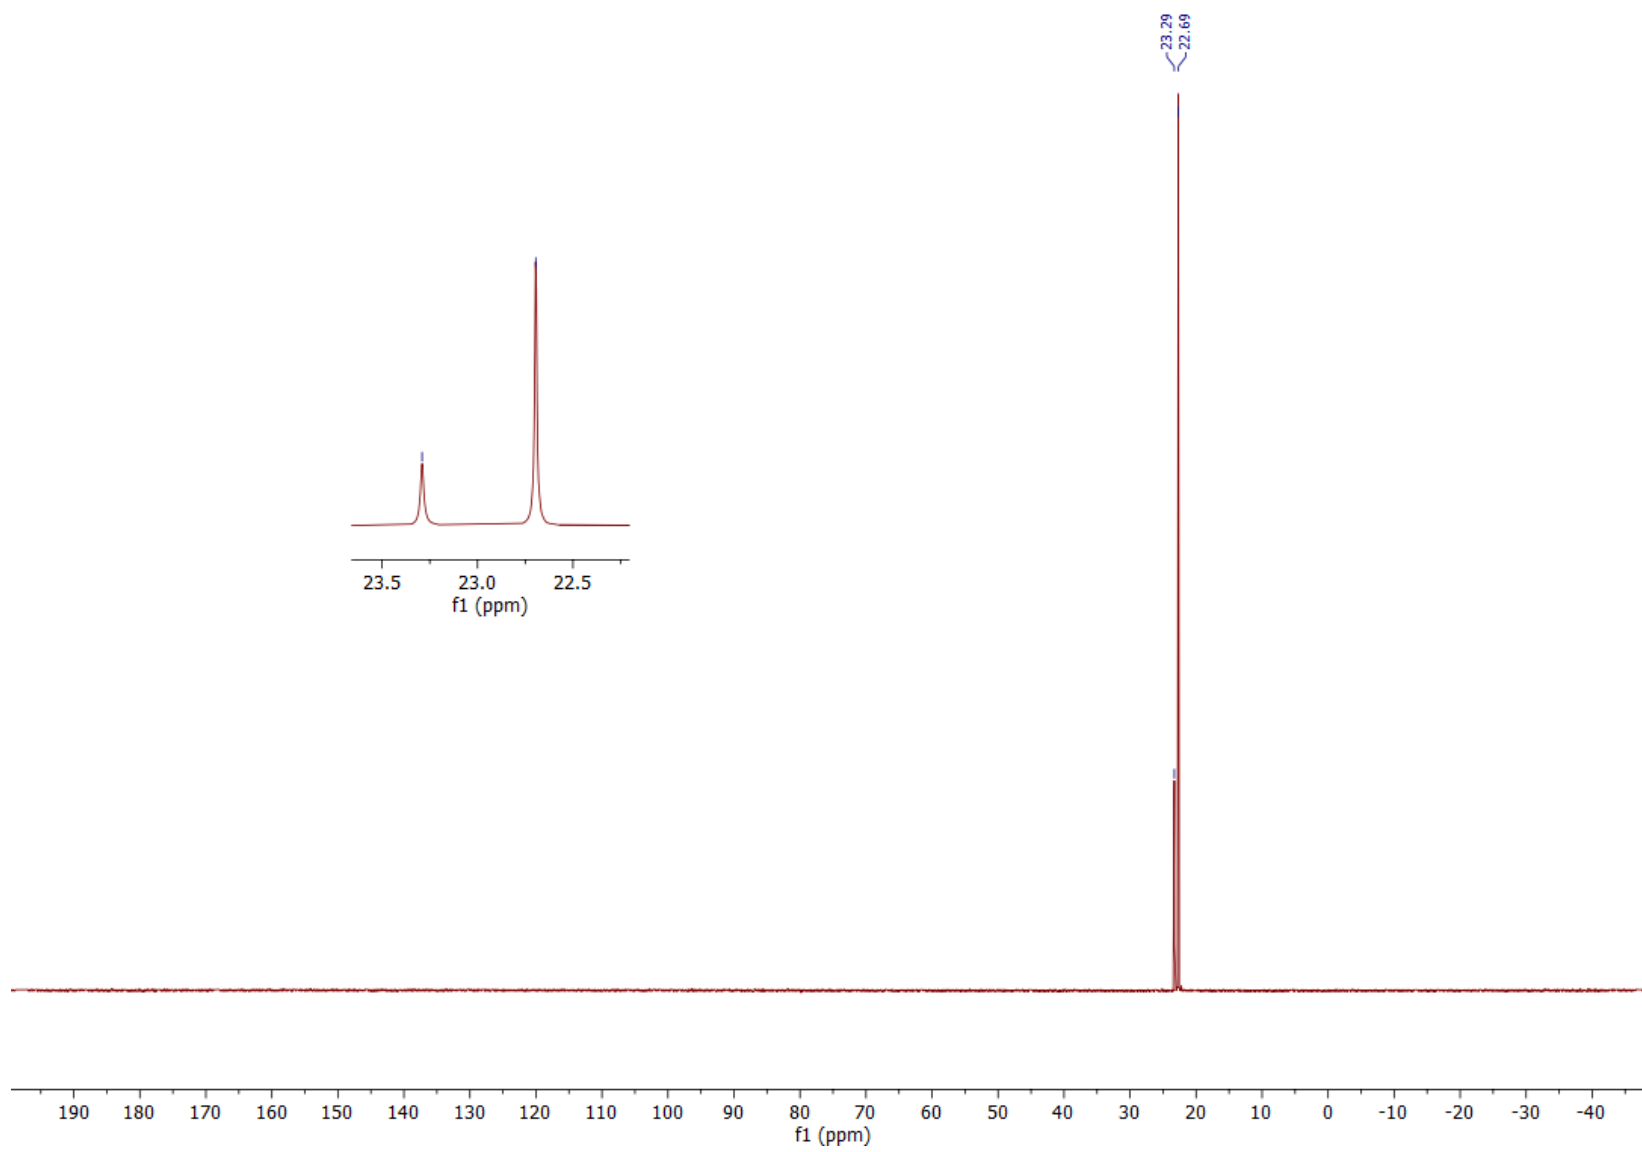

**Figure S71.**  $^{31}\text{P}$  NMR spectrum of **4j** diastereomer 2.

*Tert*-butyl 2-((2-(benzo[*b*]thiophen-2-yl)acetamido)(diethoxyphosphoryl)methyl)piperidine-1-carboxylate (**4k**)

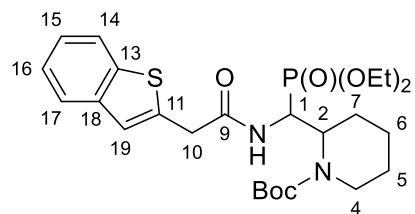

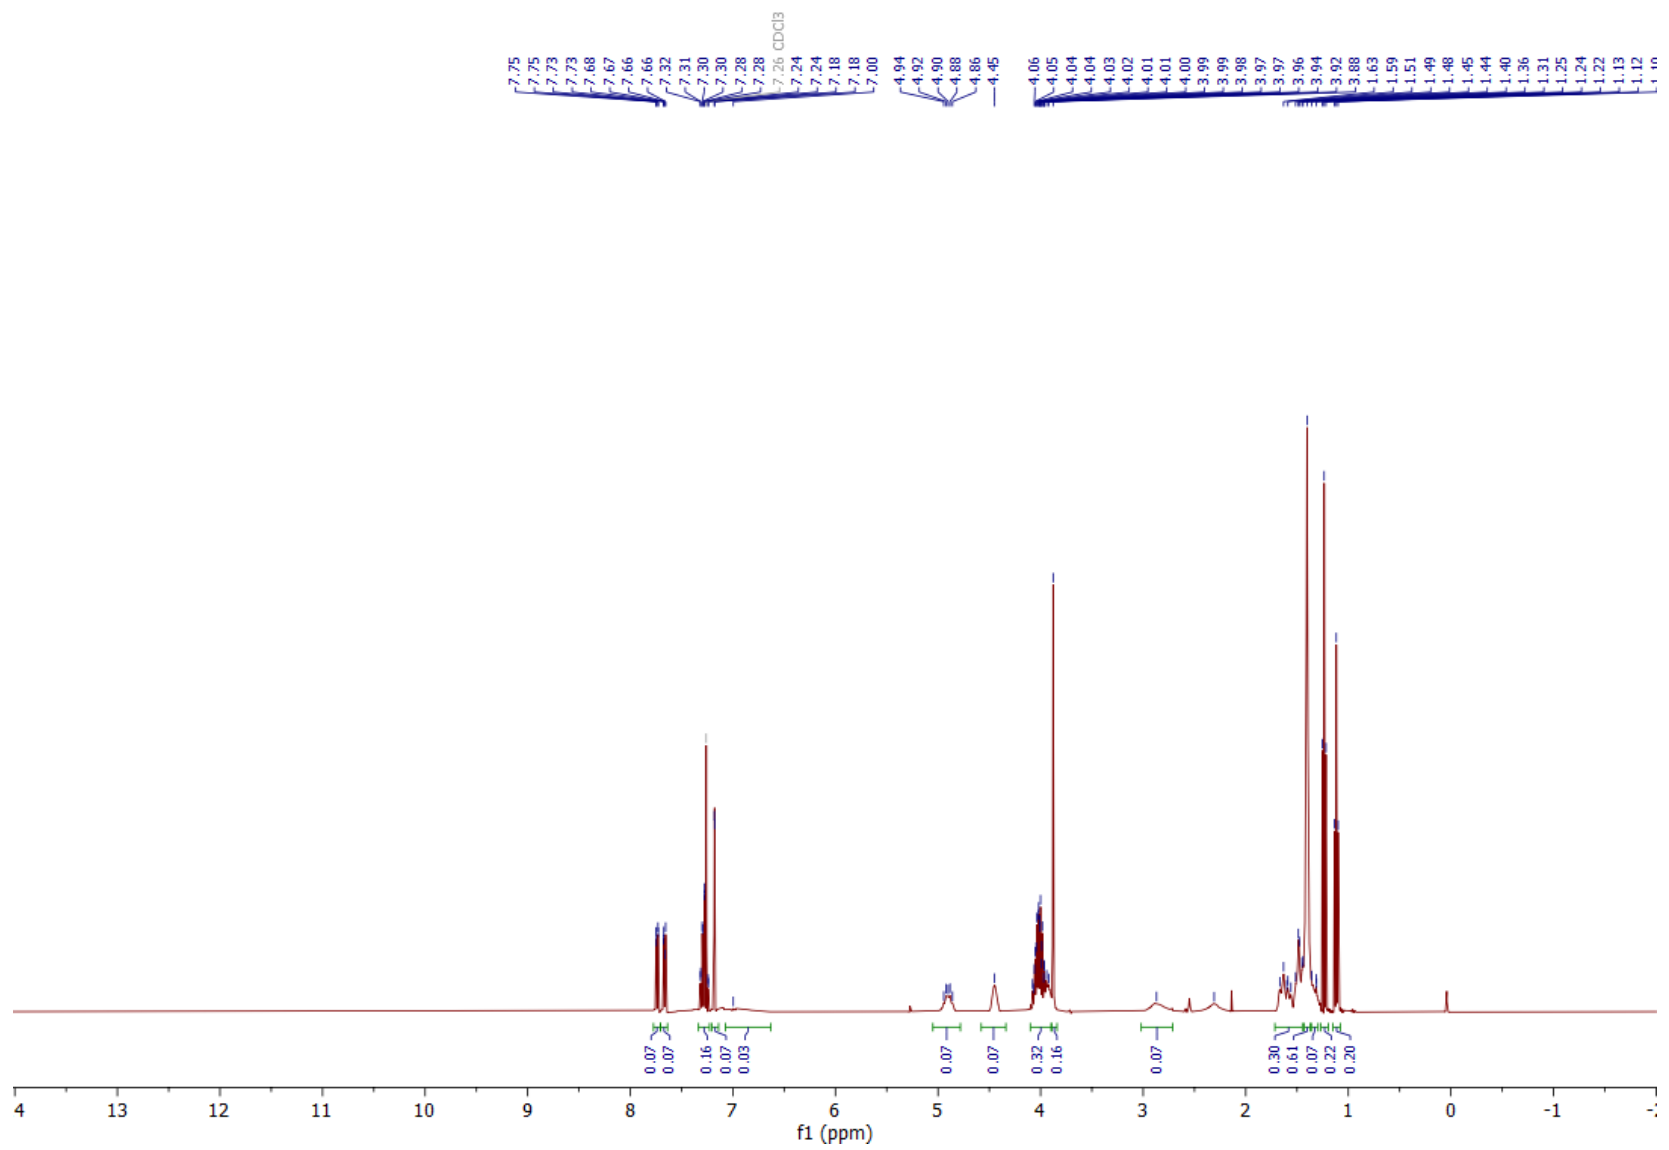

**Figure S72.**  $^1\text{H}$  NMR spectrum of **4k** diastereomer 1.

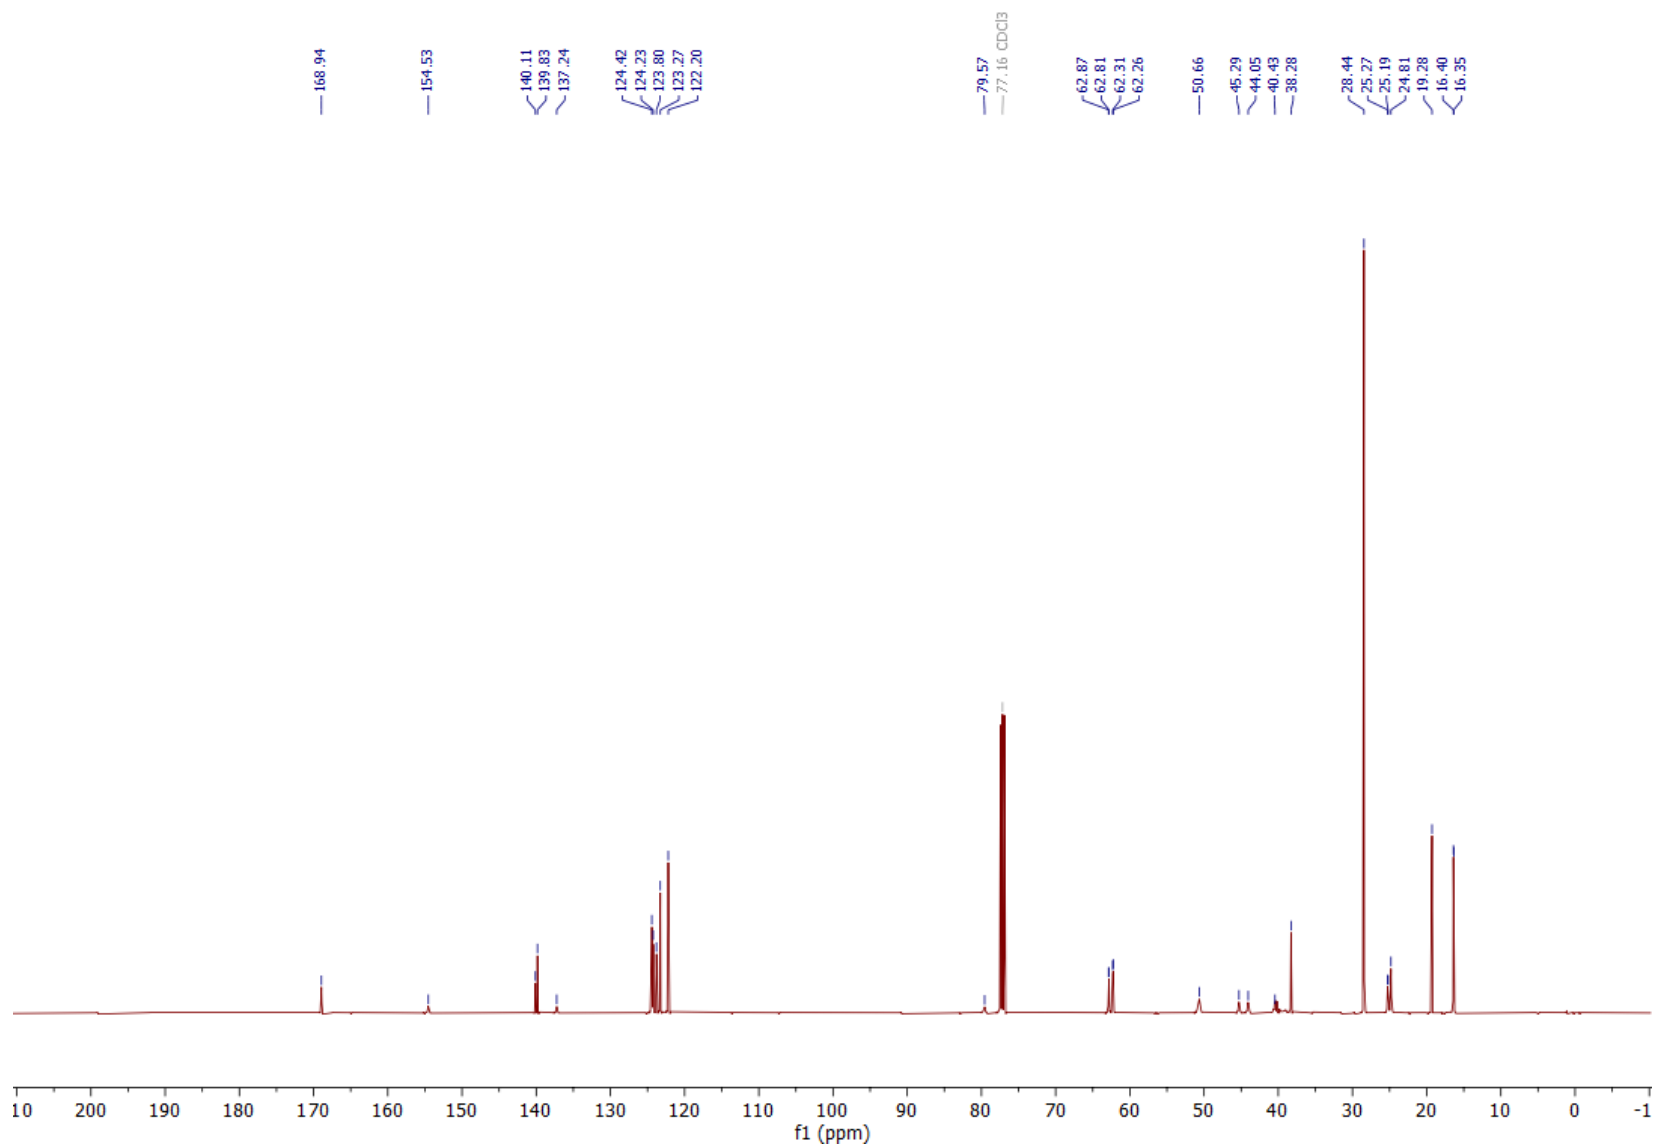

**Figure S73.** <sup>13</sup>C NMR spectrum of **4k** diastereomer 1.

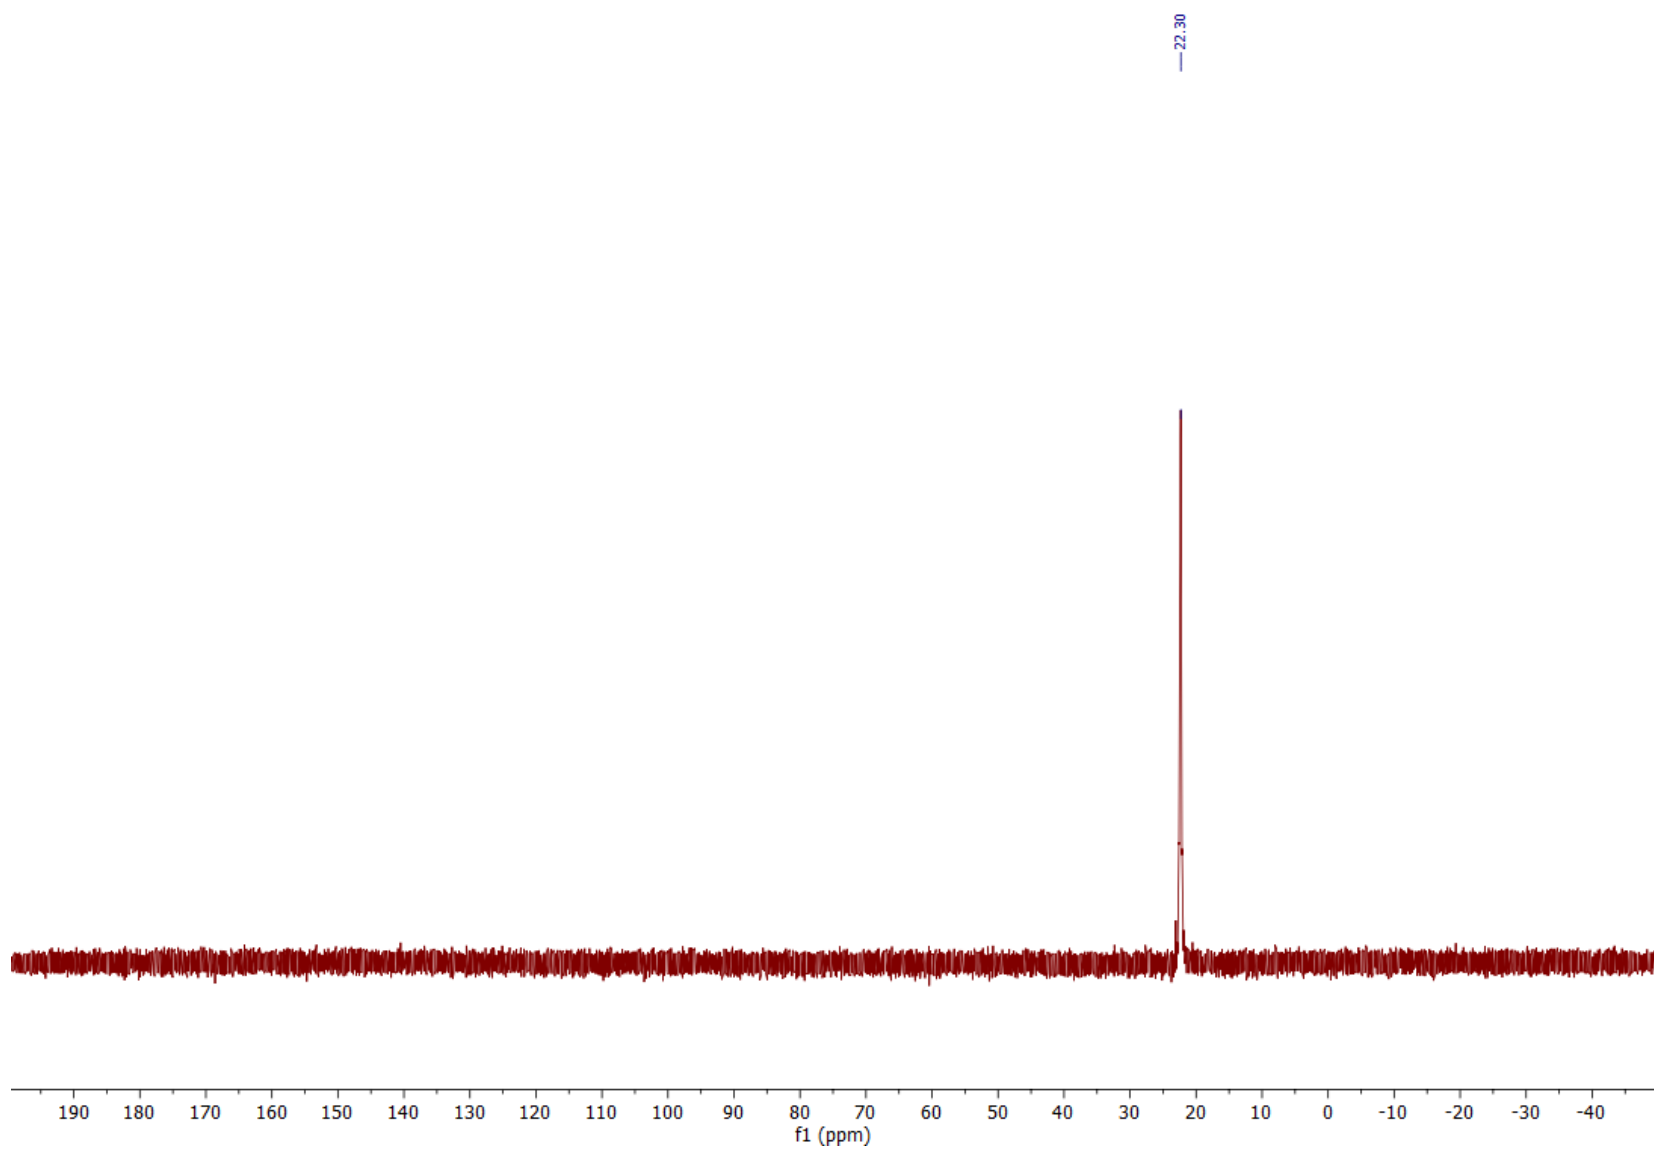

**Figure S74.**  $^{31}\text{P}$  NMR spectrum of **4k** diastereomer 1.

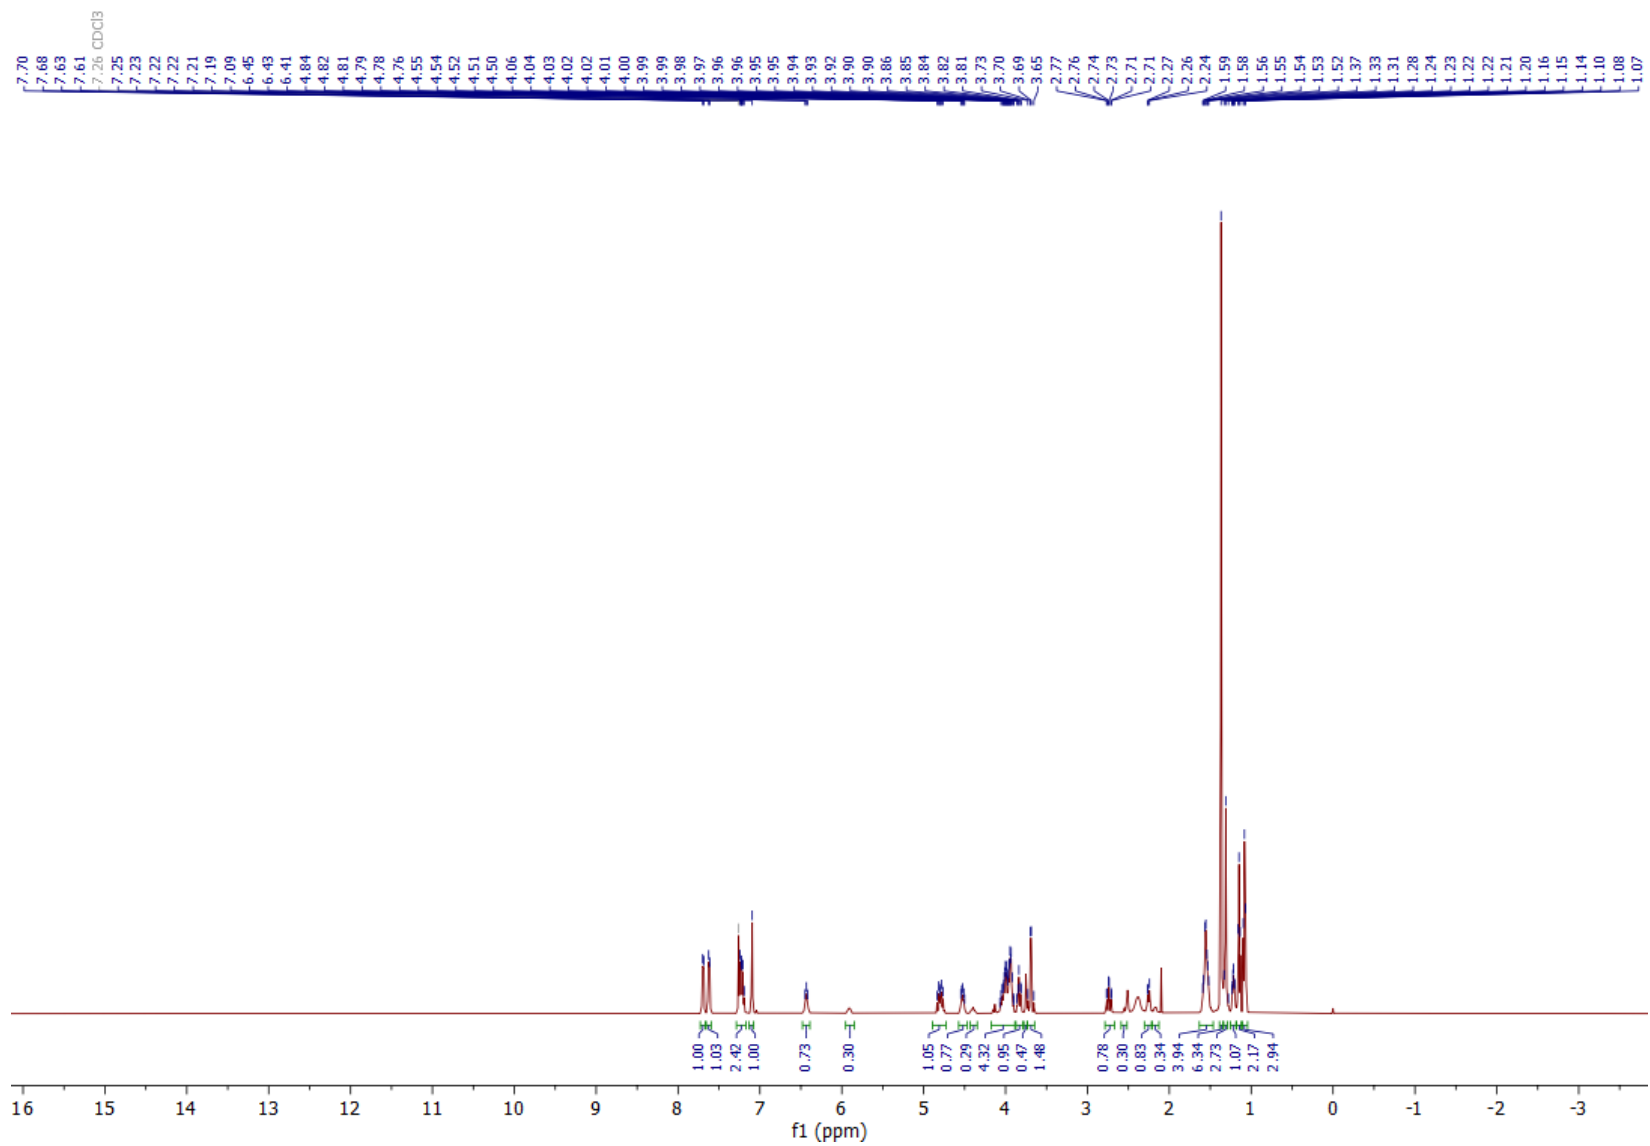

Figure S75. <sup>1</sup>H NMR spectrum of **4k** diastereomer 2.

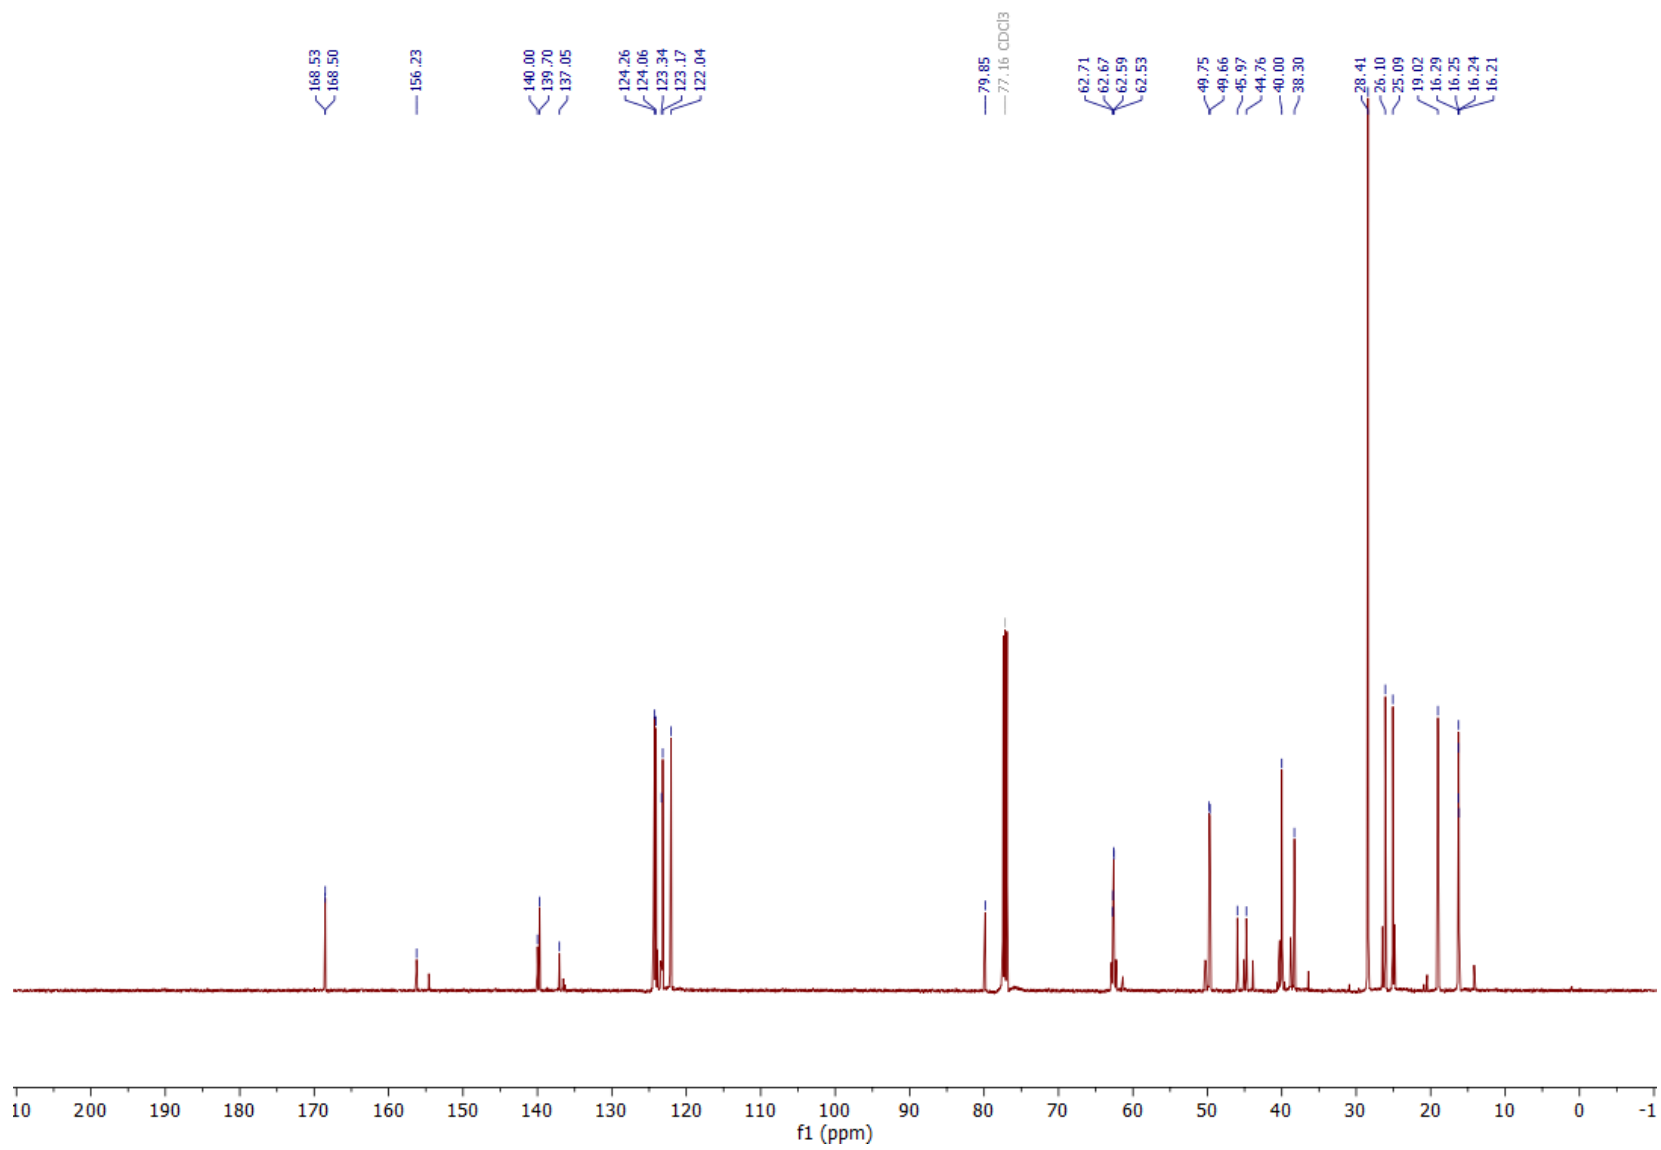

**Figure S76.** <sup>13</sup>C NMR spectrum of **4k** diastereomer 2.

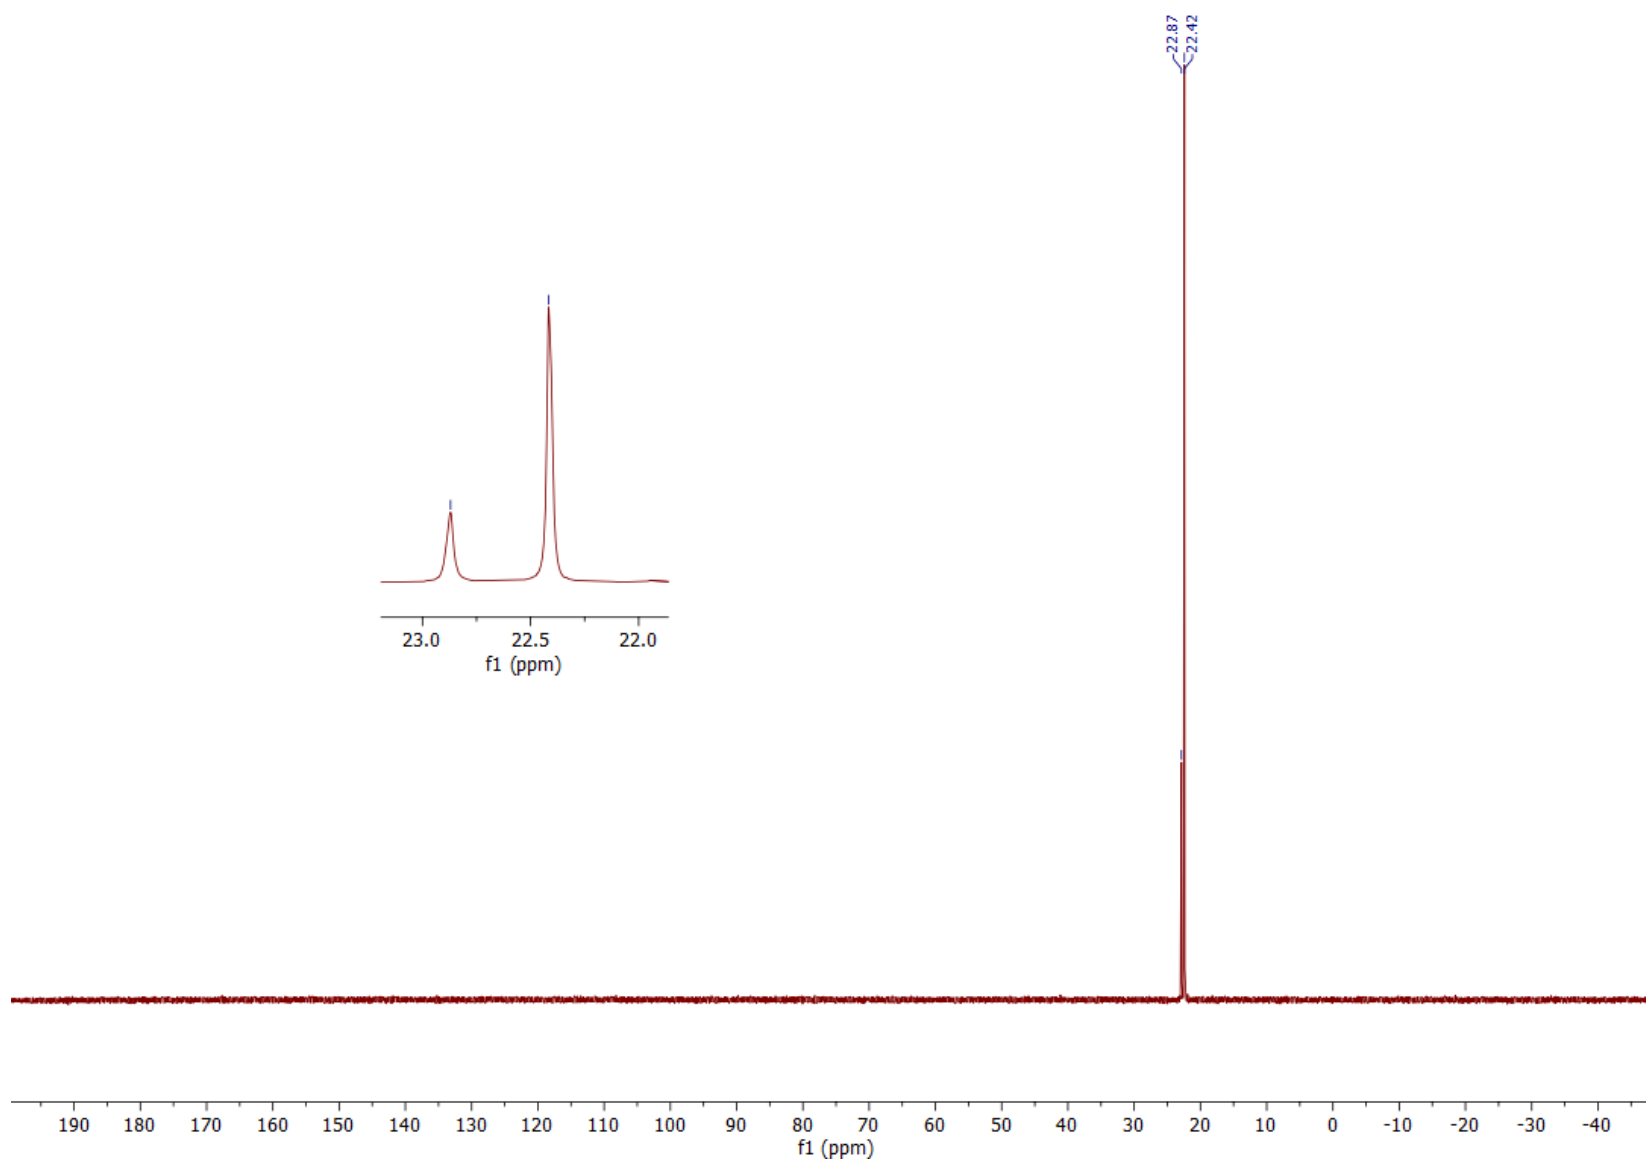

**Figure S77.**  $^{31}\text{P}$  NMR spectrum of **4k** diastereomer 2.



*Tert*-butyl 2-((2-(benzo[*b*]thiophen-3-yl)acetamido)(diethoxyphosphoryl)methyl)piperidine-1-carboxylate (**41**)

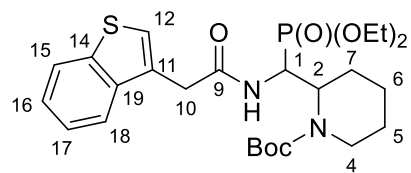



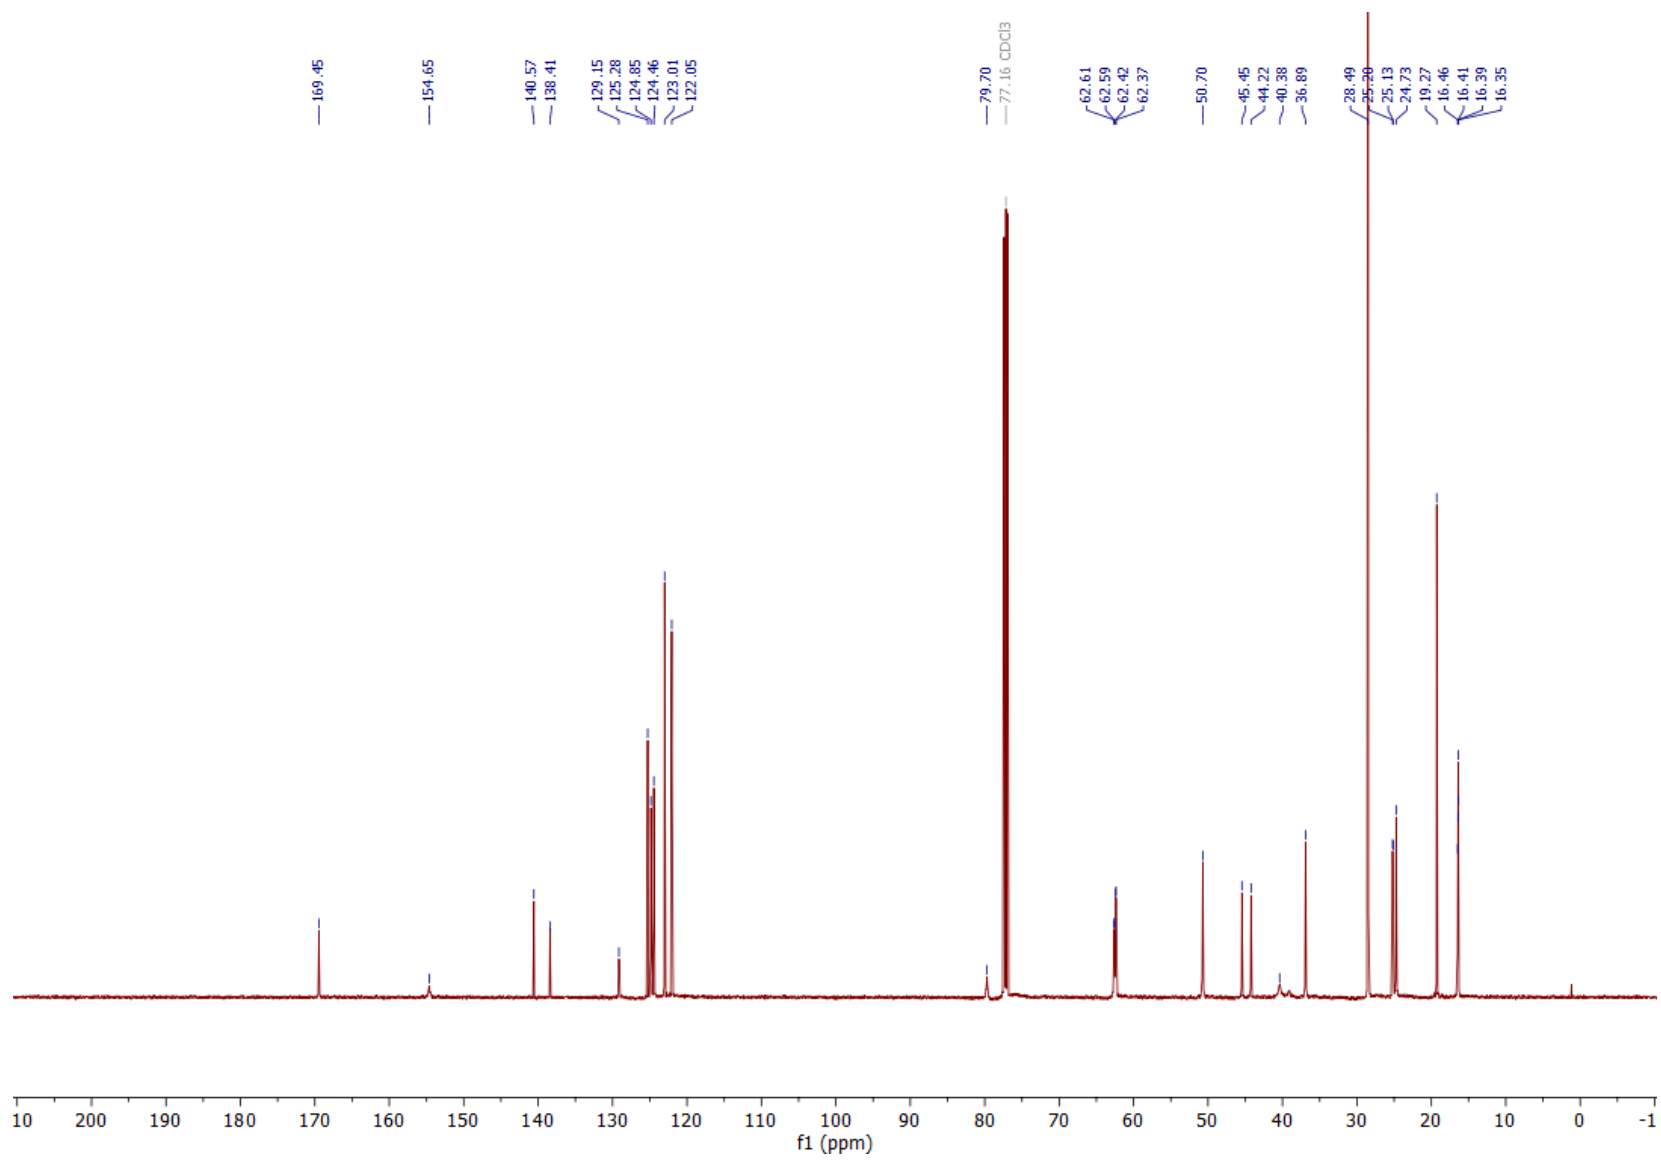

**Figure S79.**  $^{13}\text{C}$  NMR spectrum of **4I** diastereomer **1**.

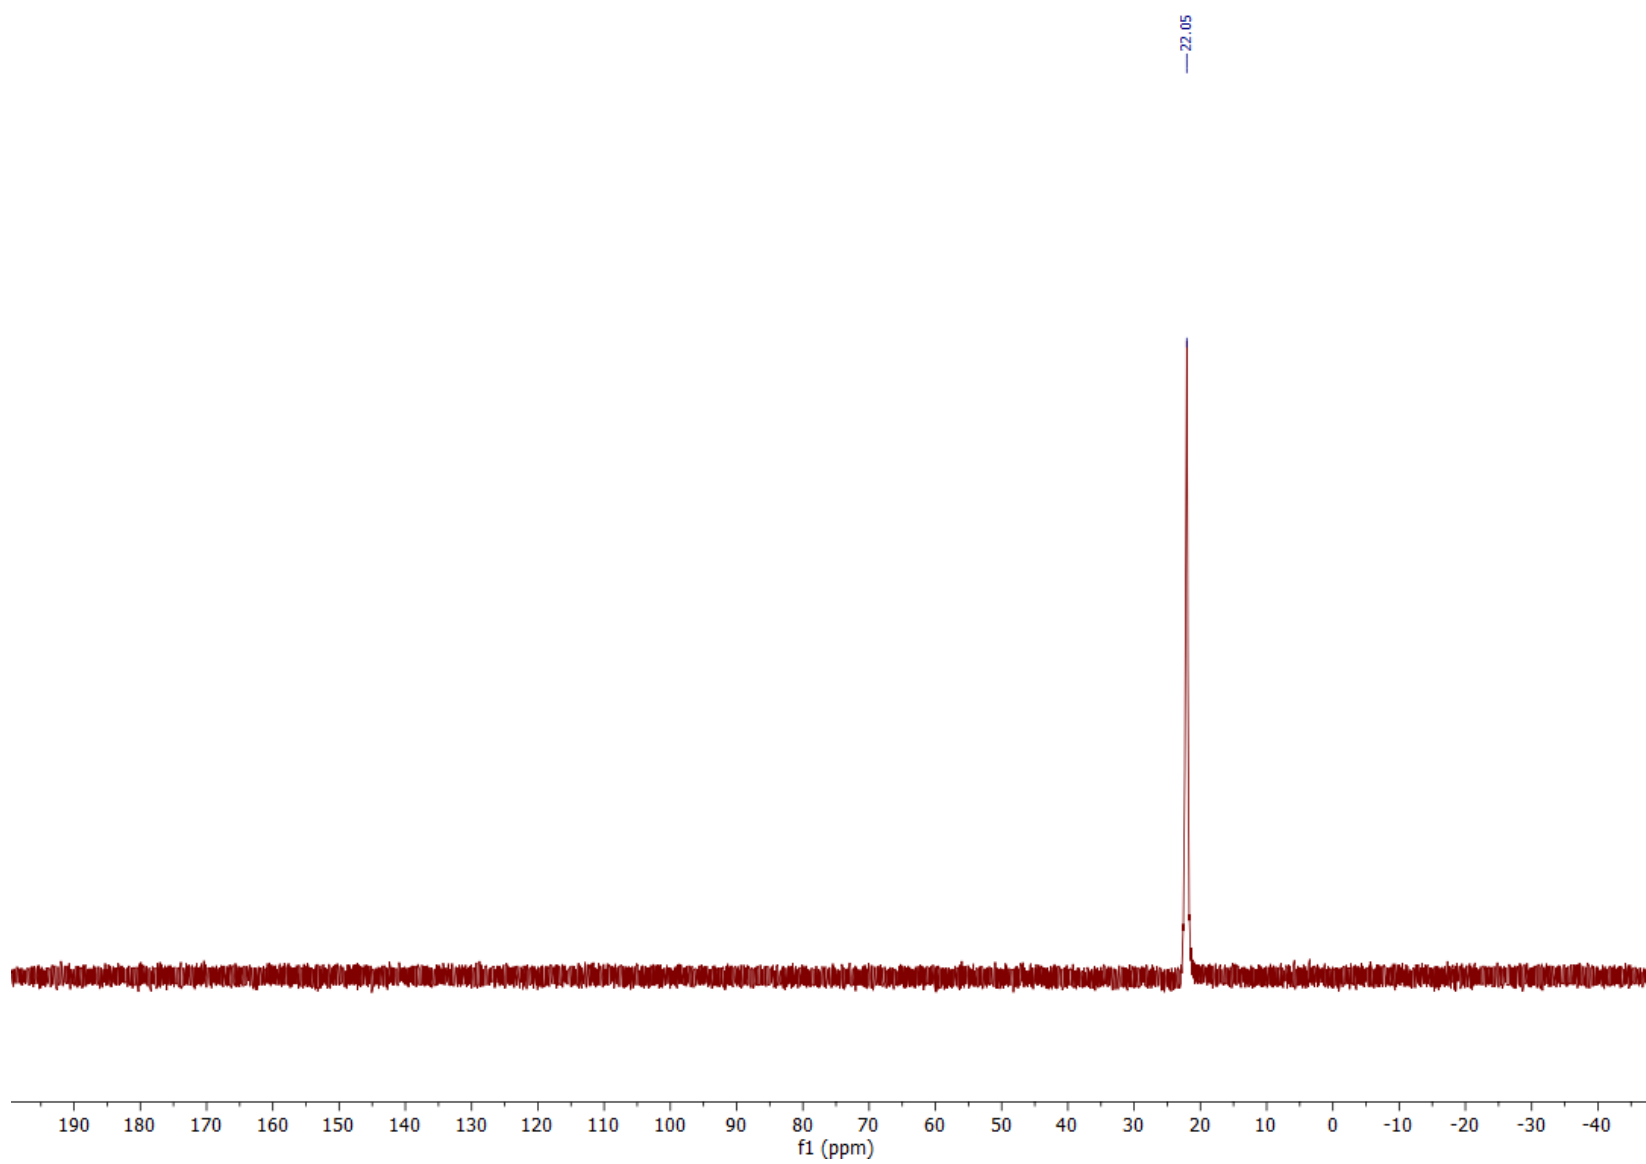

**Figure S80.**  $^{31}\text{P}$  NMR spectrum of **4I** diastereomer 1.

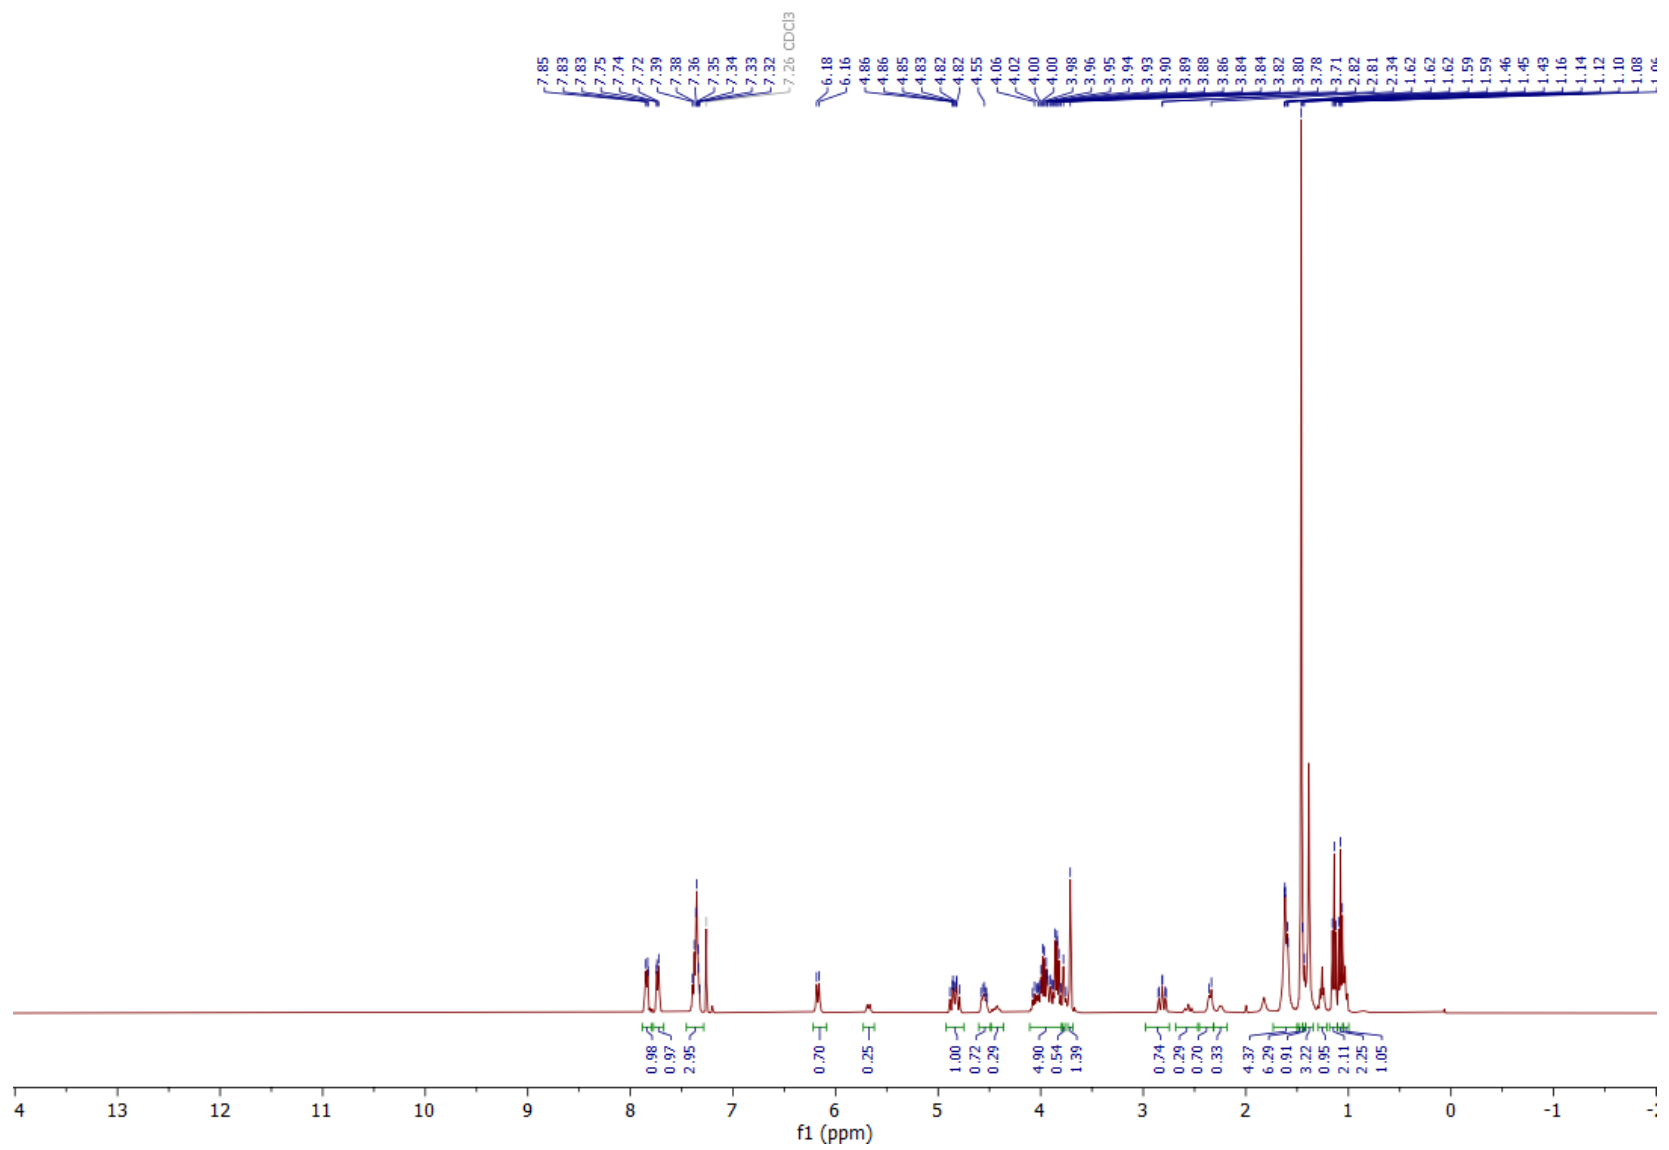

Figure S81. <sup>1</sup>H NMR spectrum of **4I** diastereomer 2.

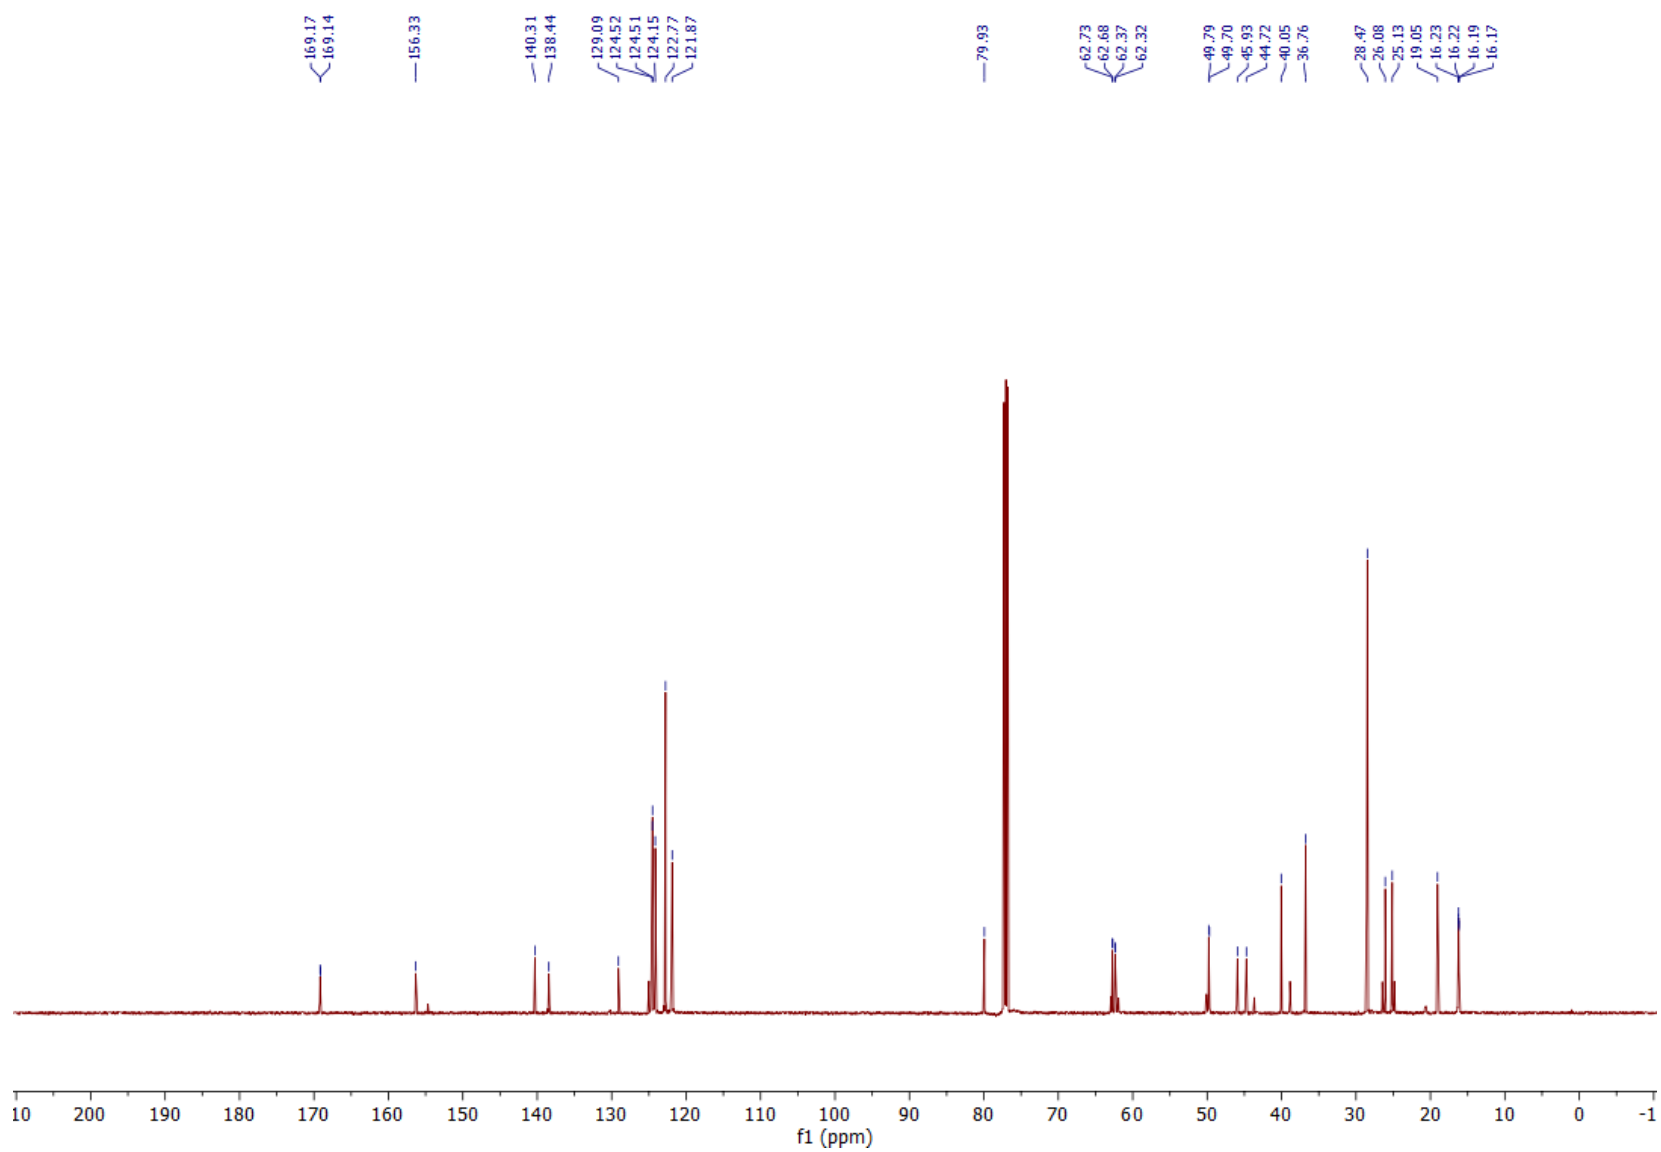

**Figure S82.** <sup>13</sup>C NMR spectrum of **41** diastereomer 2.

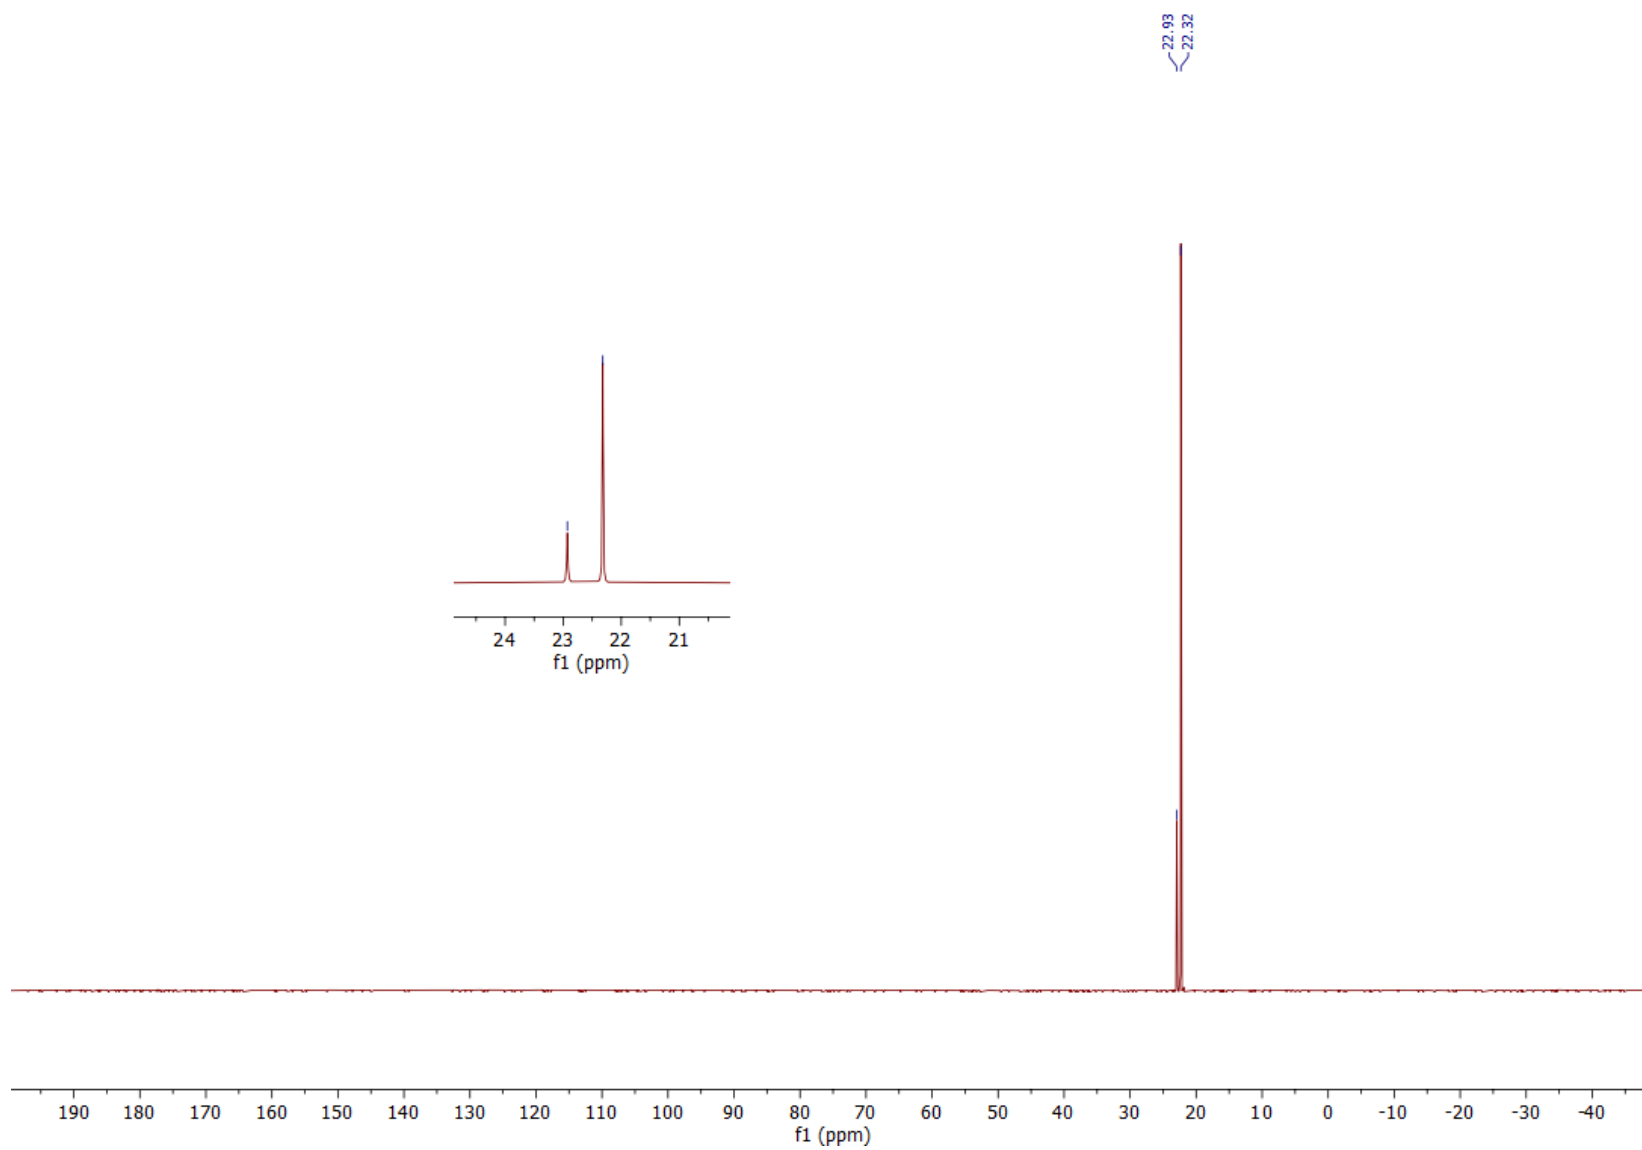

**Figure S83.**  $^{31}\text{P}$  NMR spectrum of **4I** diastereomer 2.

((2-(4-Methyl-2-thioxo-2,3-dihydrothiazol-5-yl)acetamido)(piperidin-2-yl)methyl)phosphonic acid hydrochloride (**5a**)

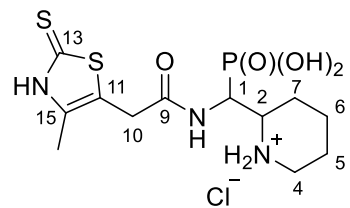



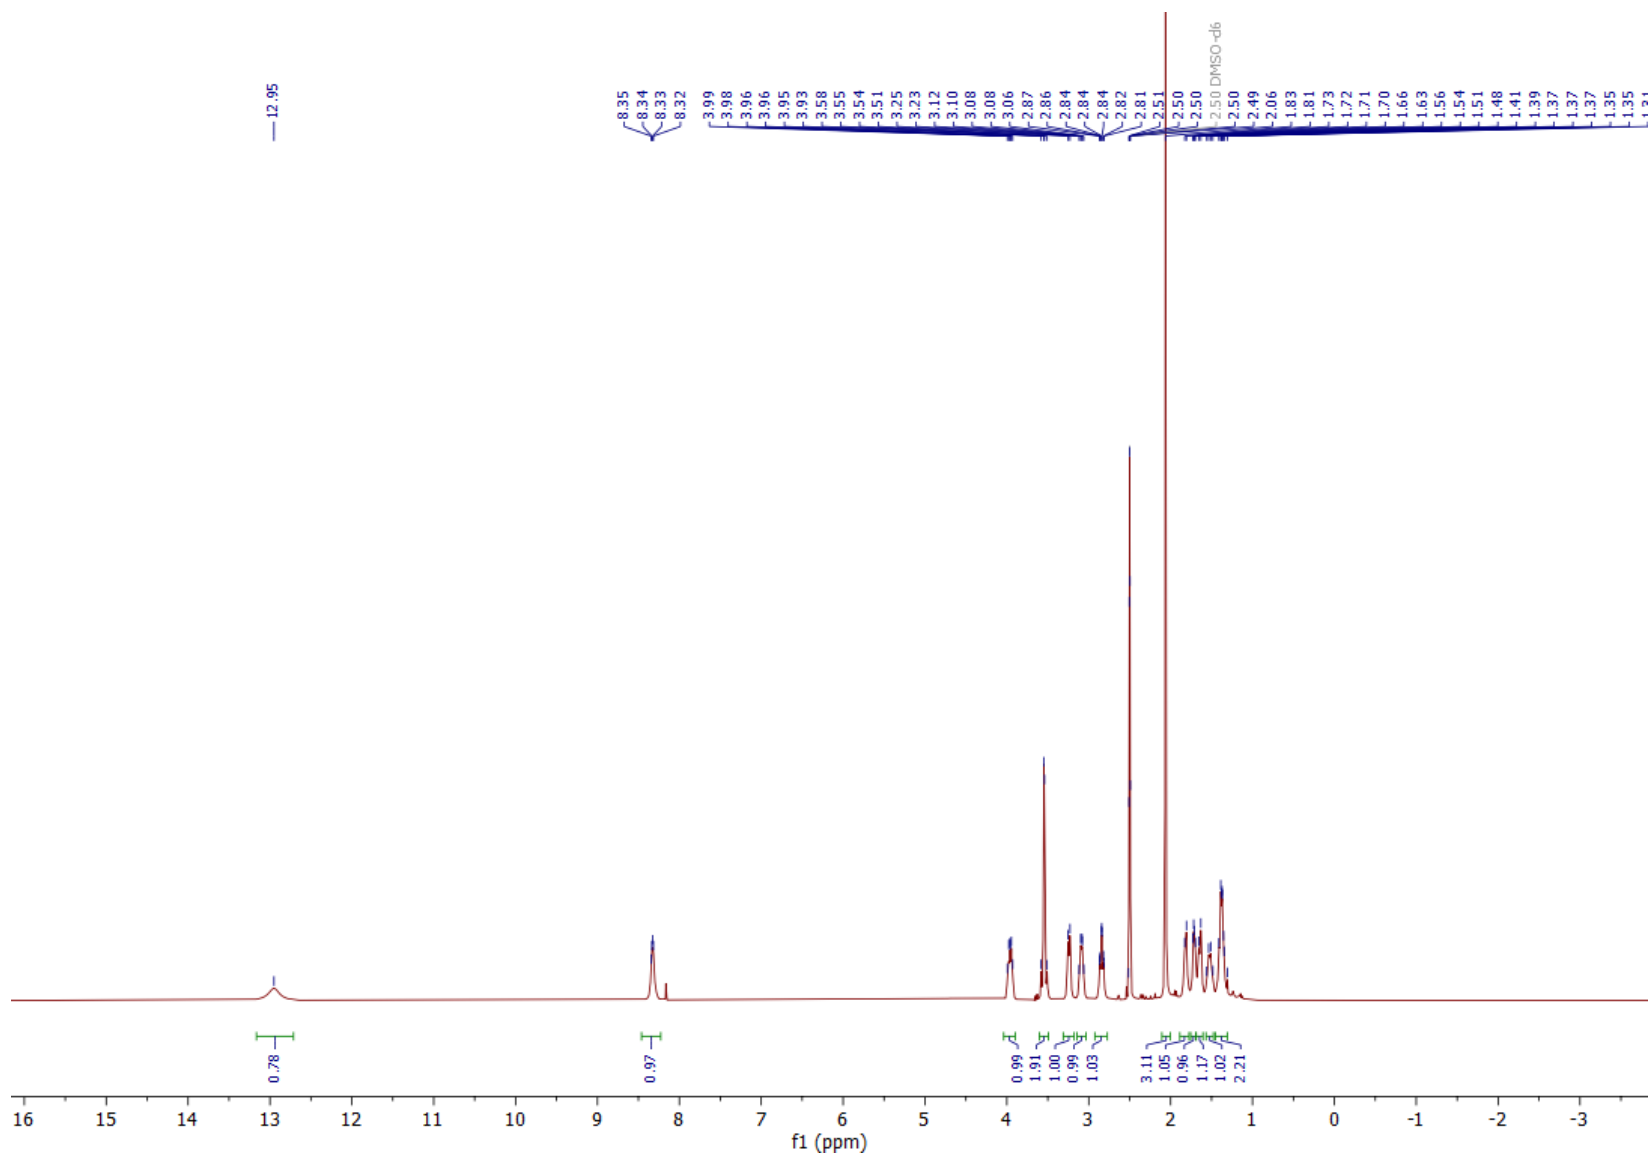

Figure S84.  $^1\text{H}$  NMR spectrum of **5a** diastereomer 1.

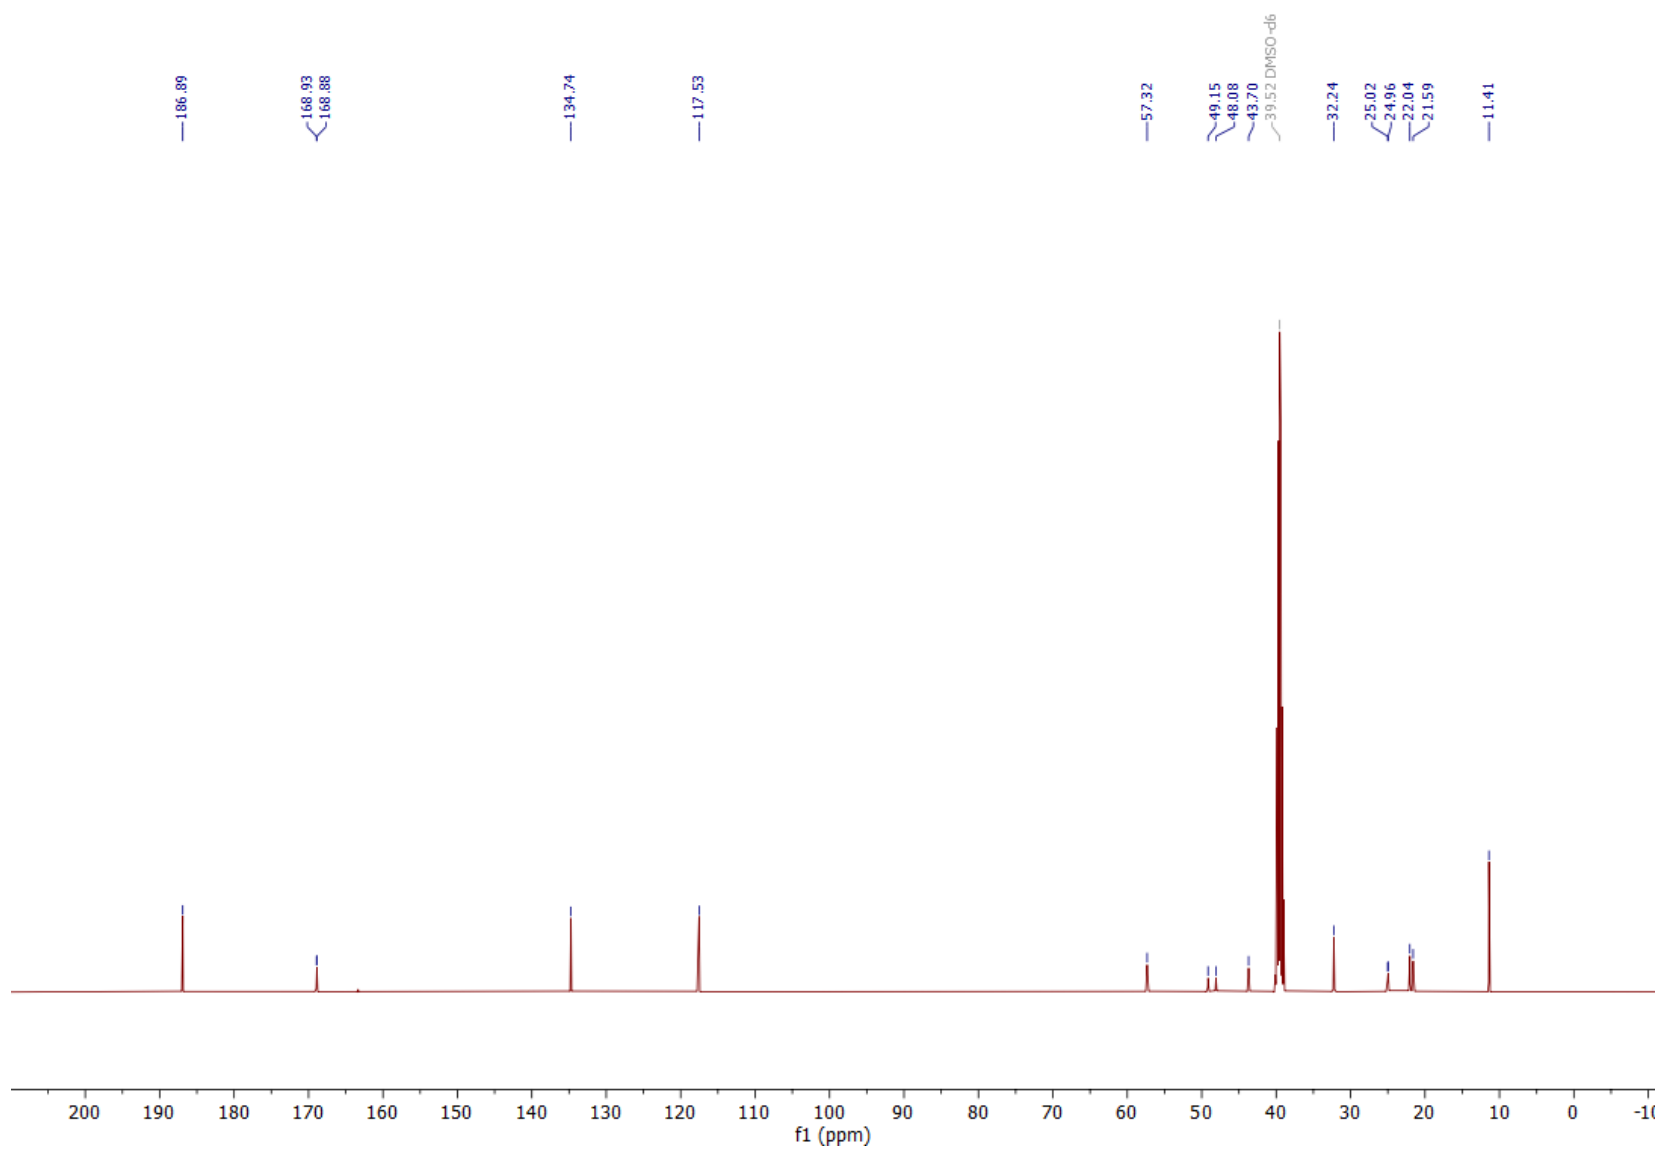

**Figure S85.** <sup>13</sup>C NMR spectrum of **5a** diastereomer 1.

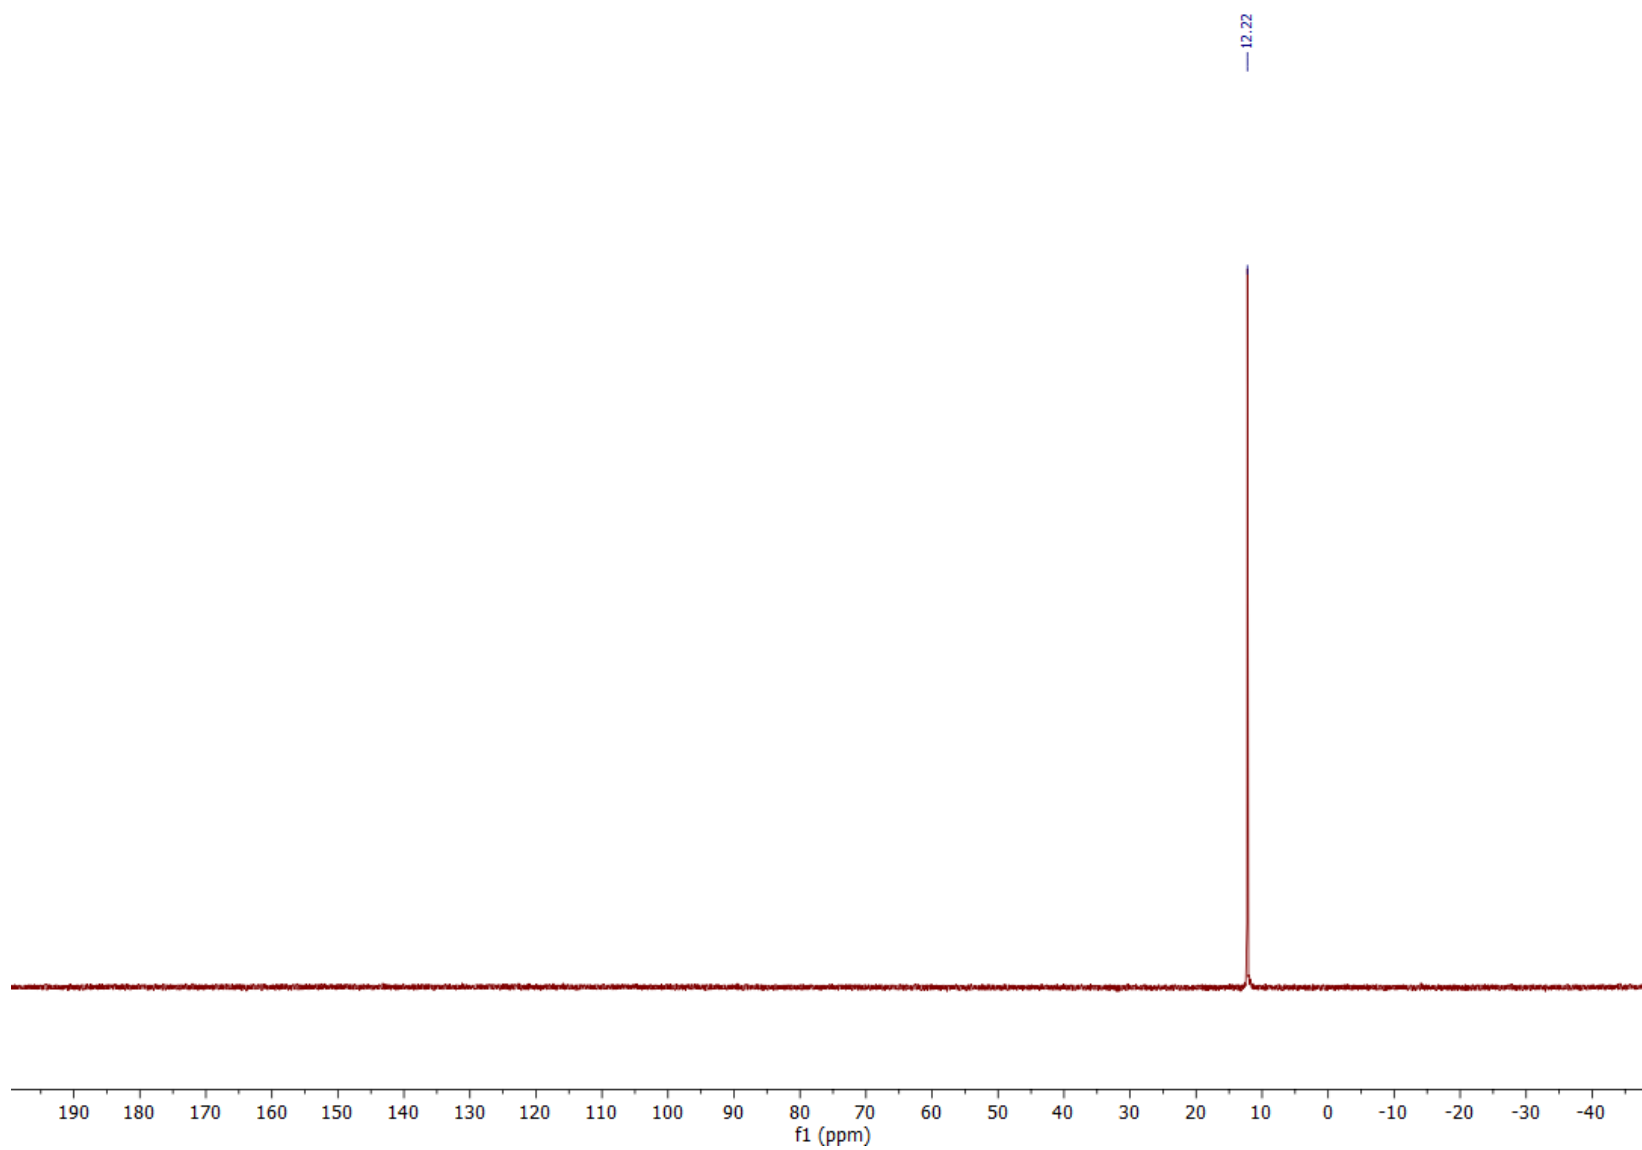

**Figure S86.**  $^{31}\text{P}$  NMR spectrum of **5a** diastereomer 1.

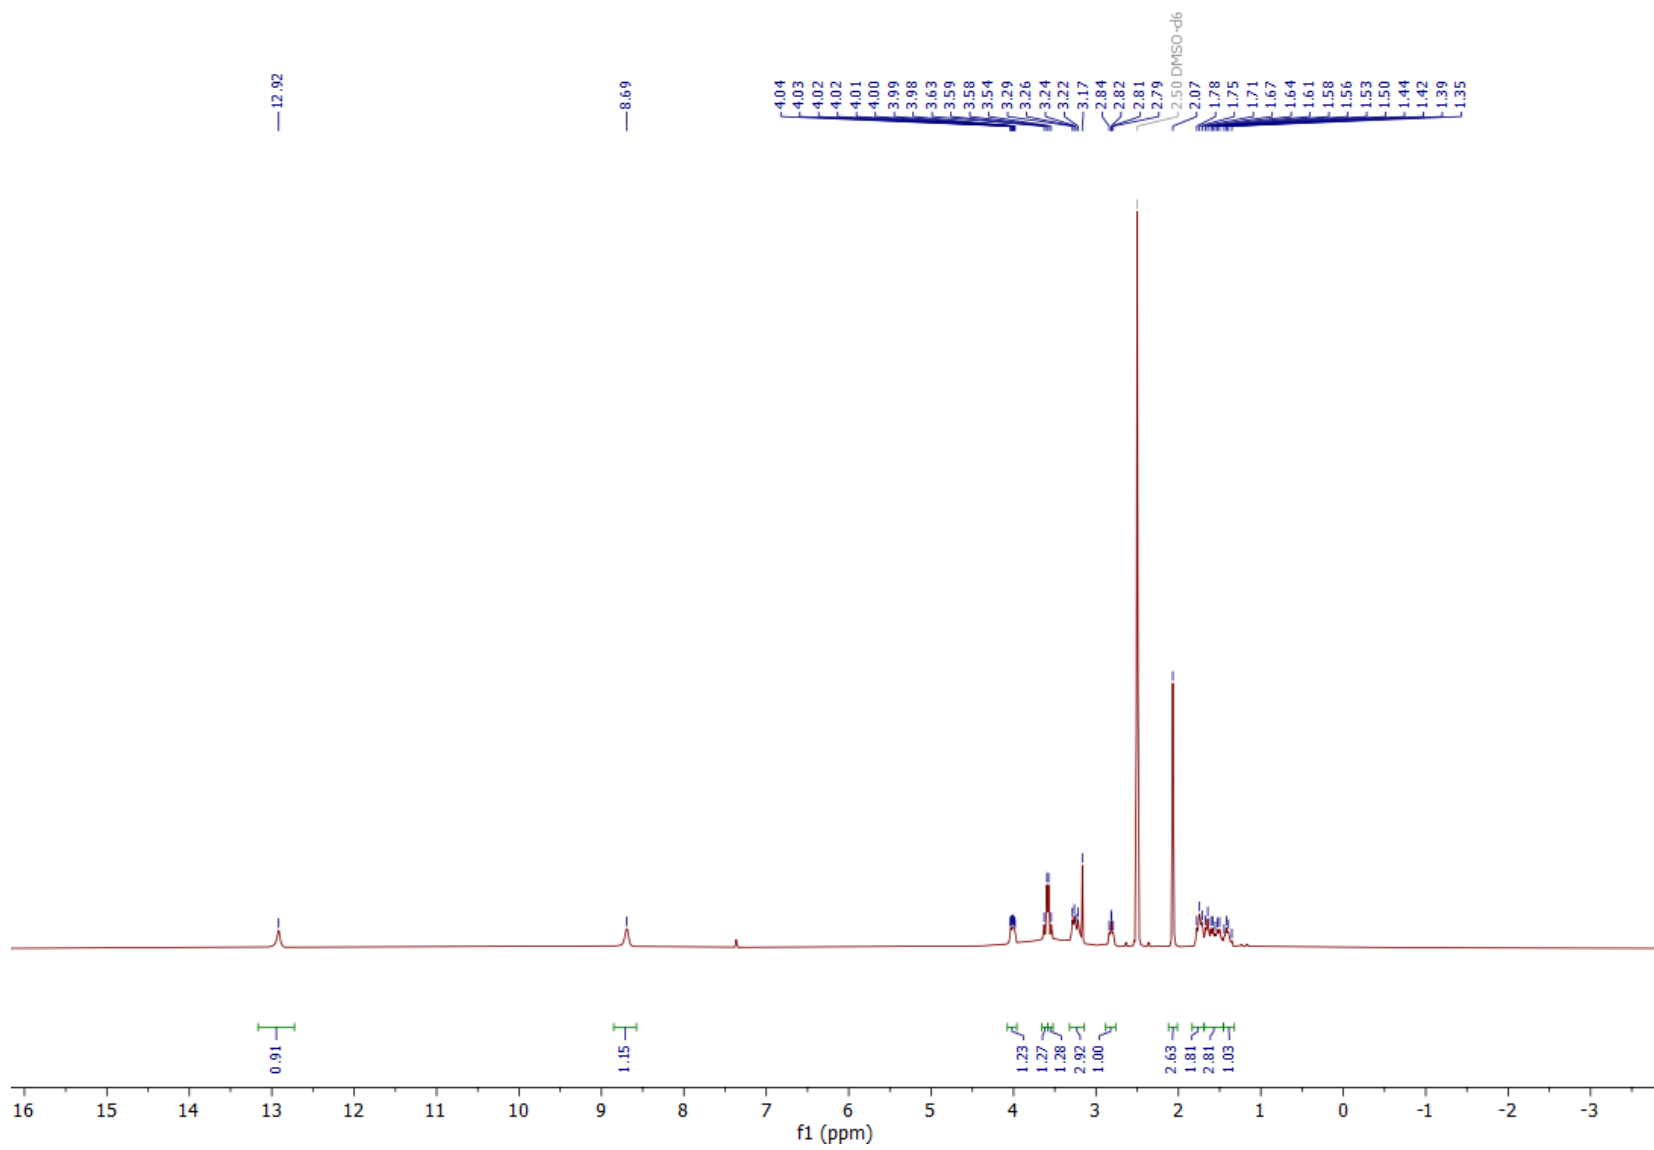

Figure S87. <sup>1</sup>H NMR spectrum of **5a** diastereomer 2.

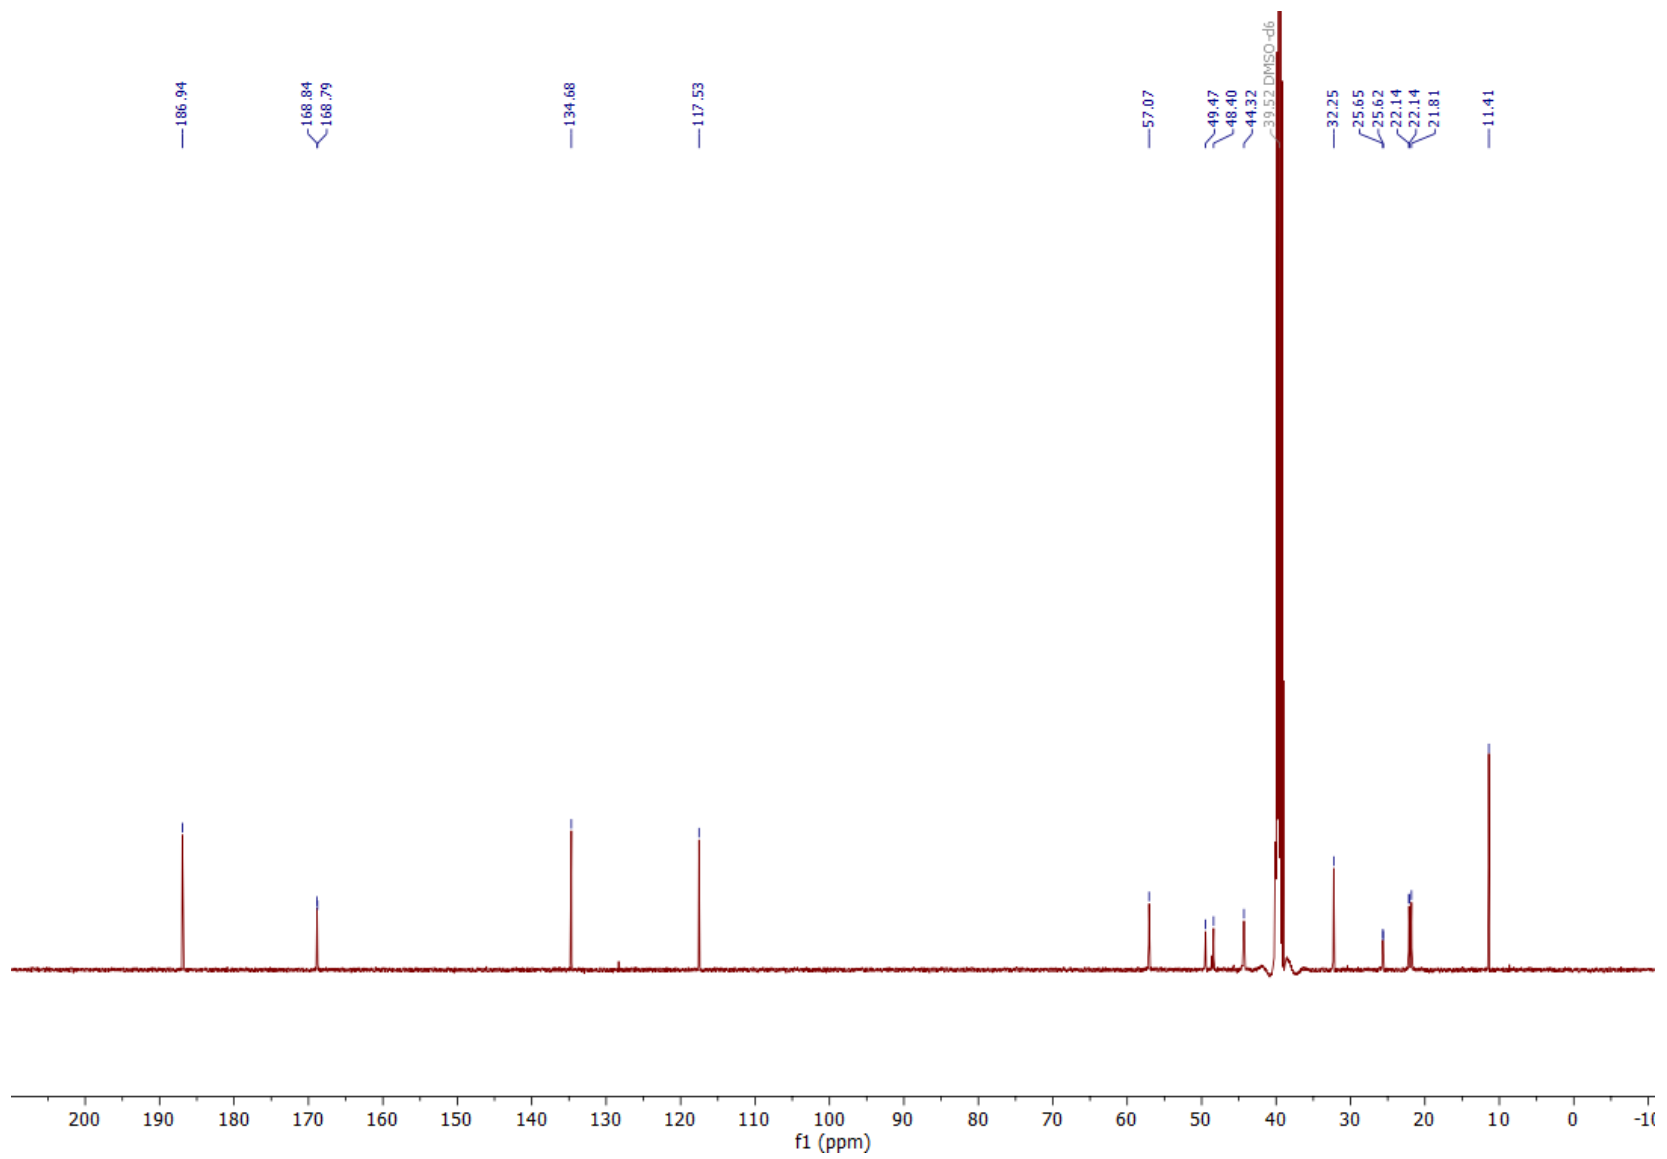

**Figure S88.**  $^{13}\text{C}$  NMR spectrum of **5a** diastereomer 2.

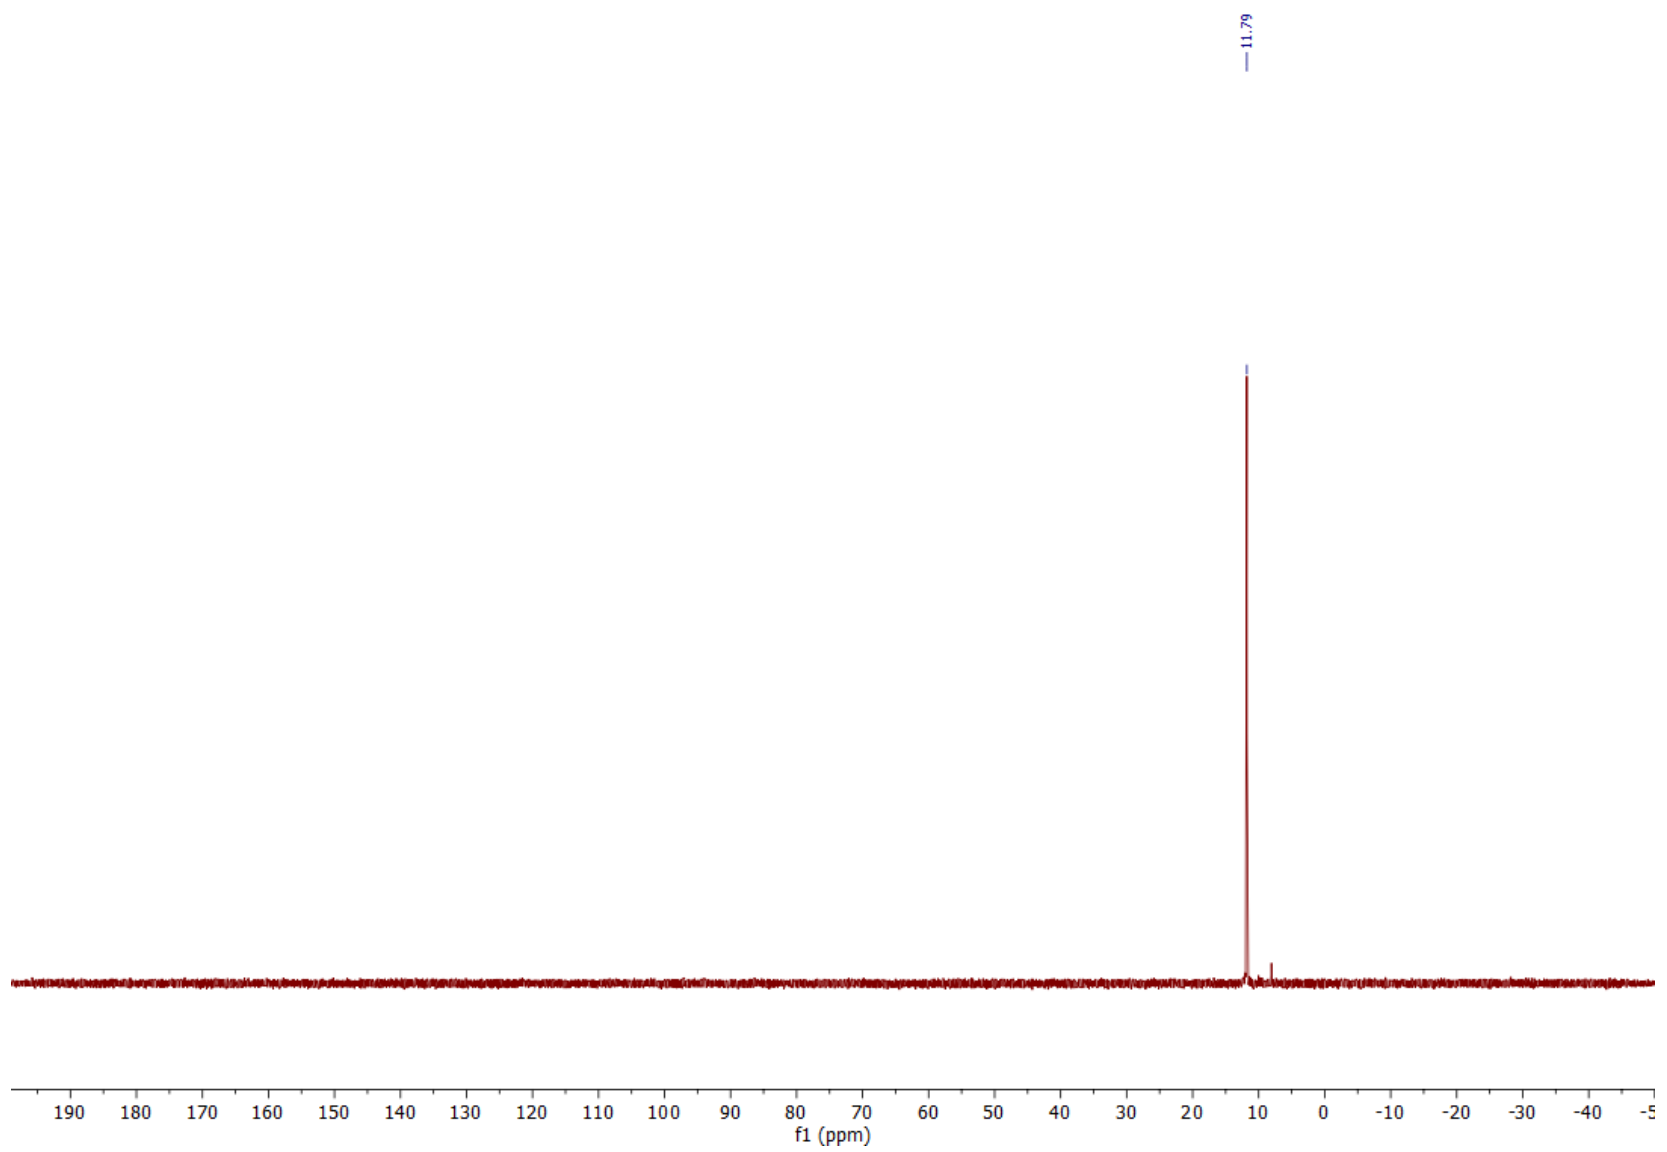

**Figure S89.**  $^{31}\text{P}$  NMR spectrum of **5a** diastereomer 2.

(Piperidin-2-yl(thiophene-2-carboxamido)methyl)phosphonic acid hydrochloride (**5b**)

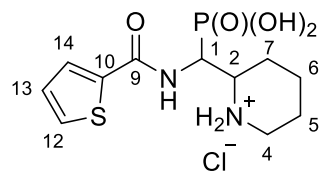

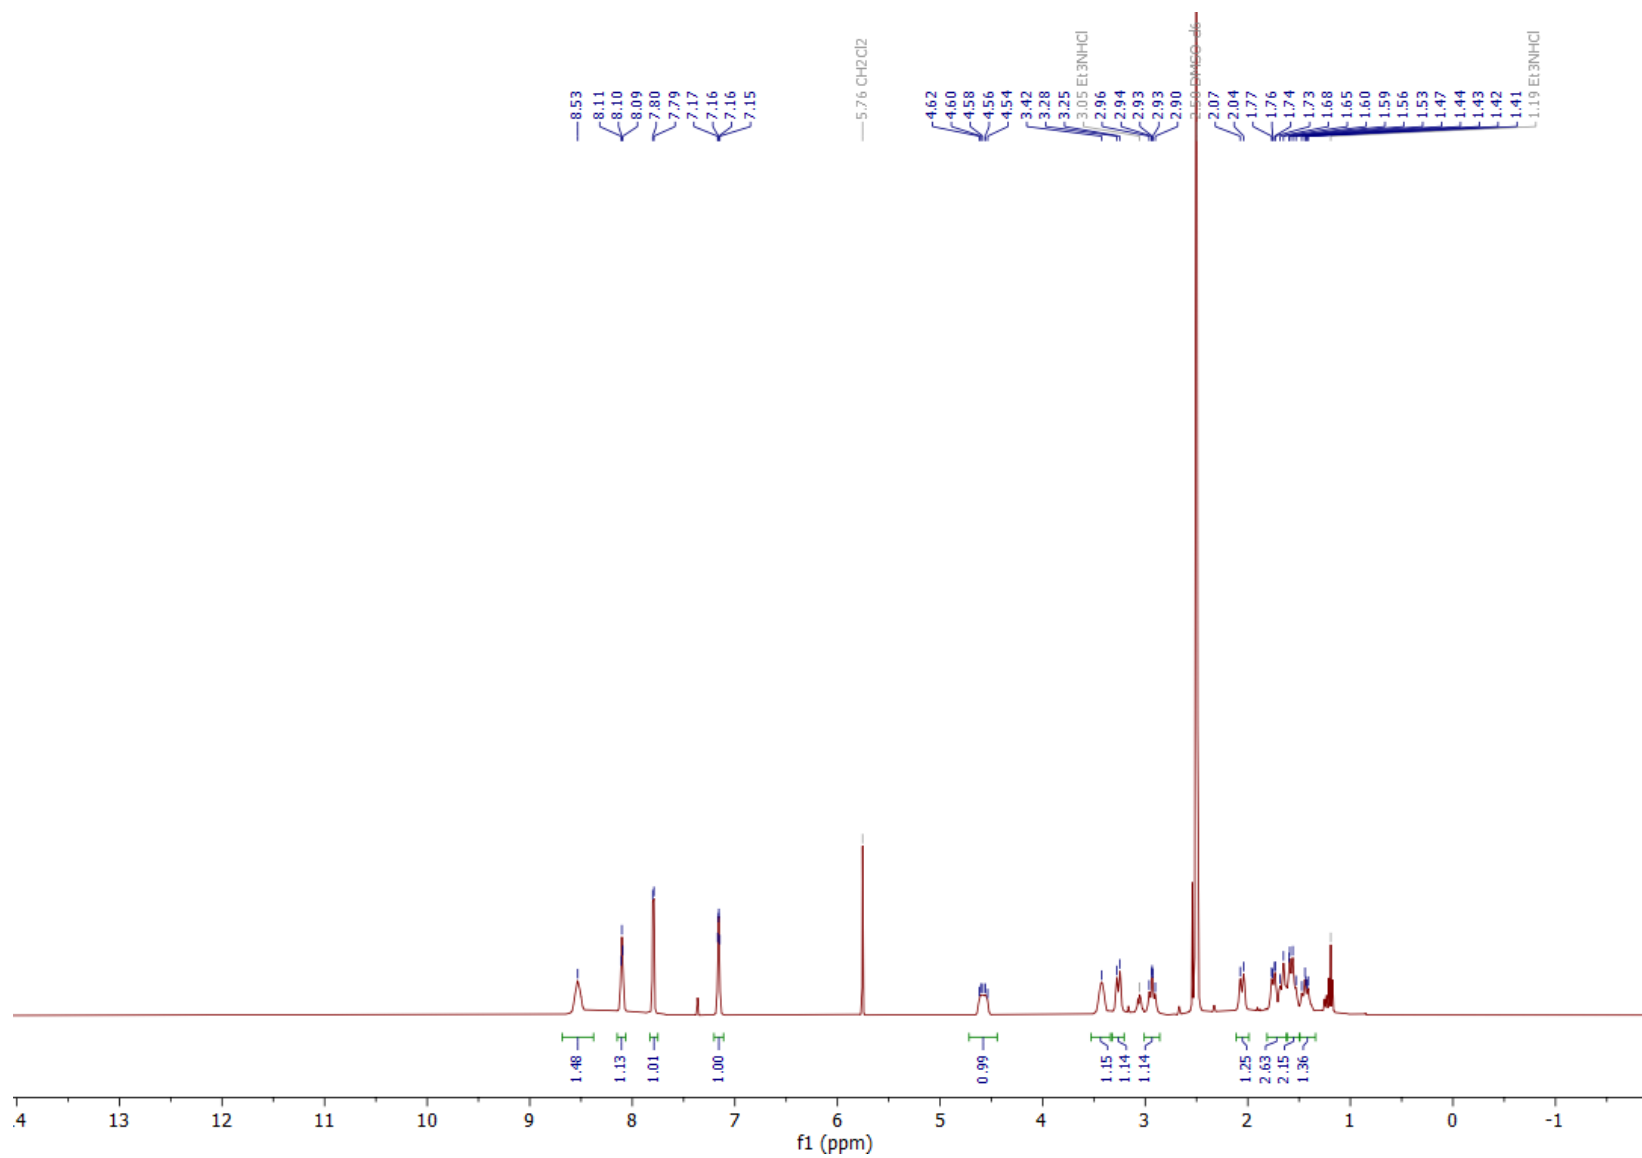

**Figure S90.** <sup>1</sup>H NMR spectrum of **5b** diastereomer 1.



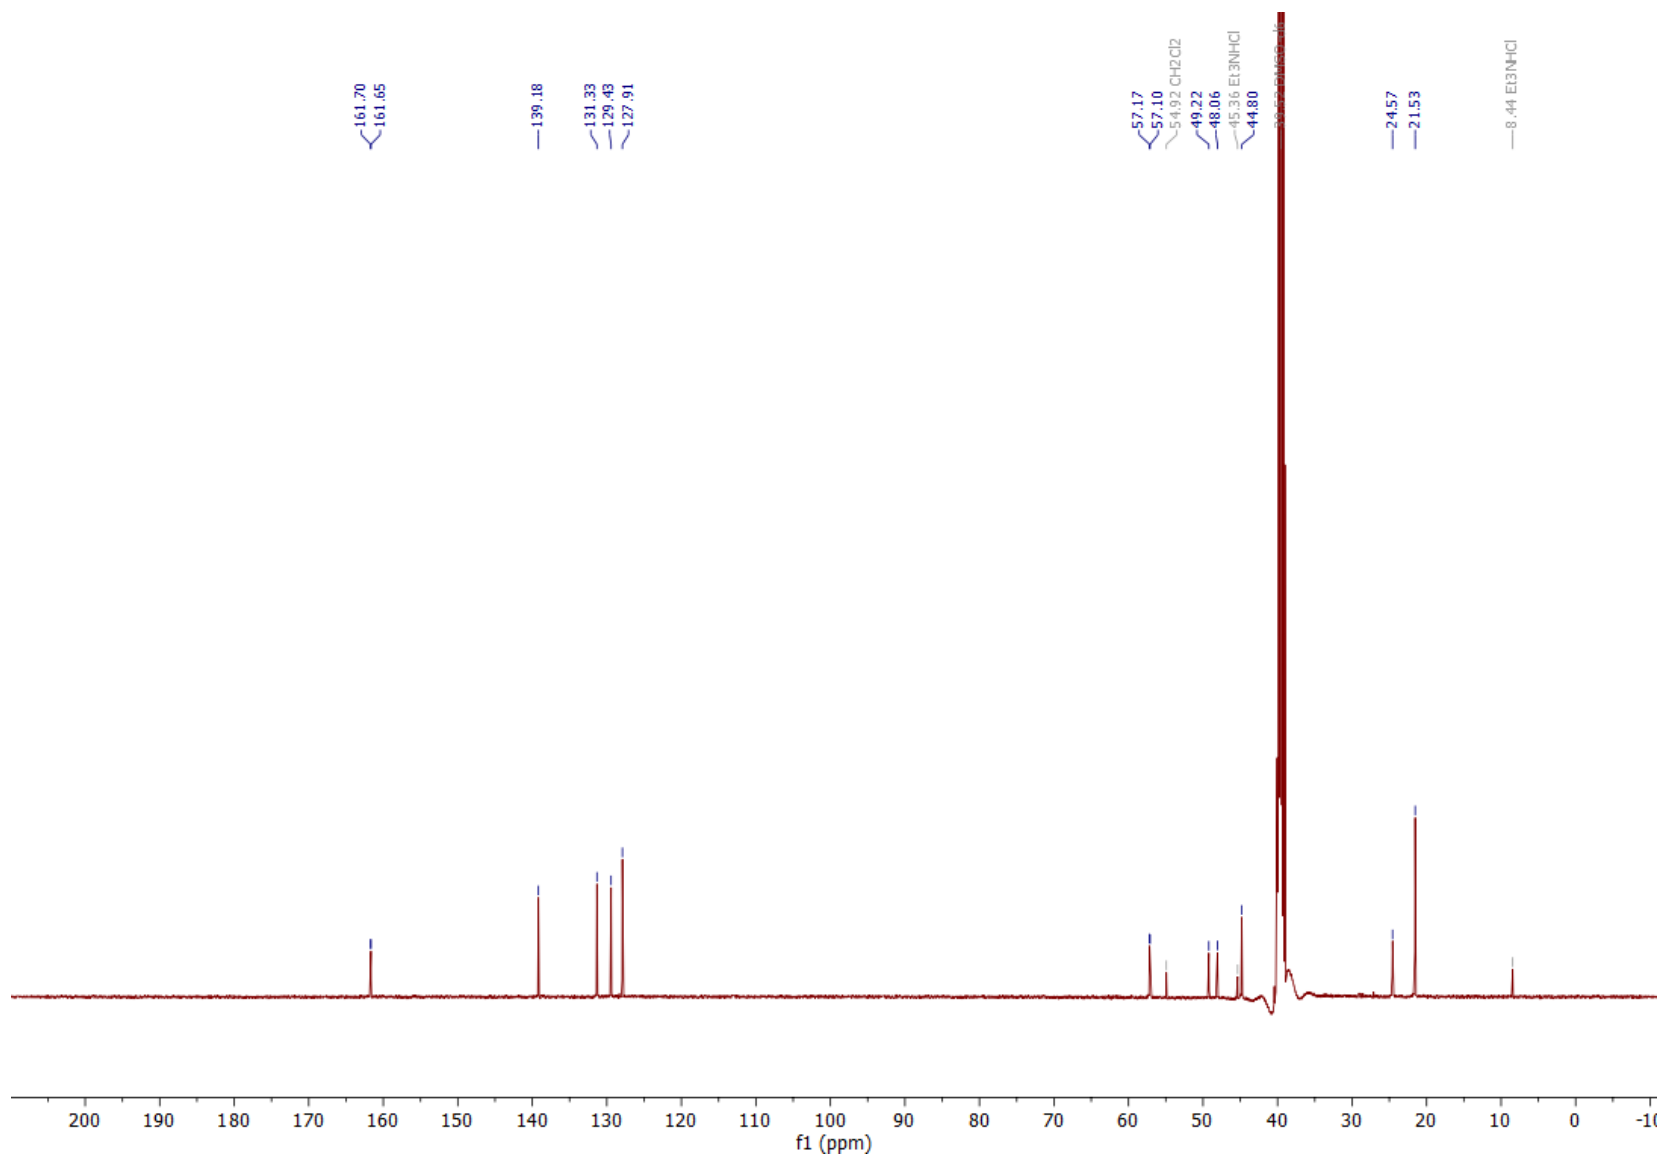

**Figure S91.** <sup>13</sup>C NMR spectrum of **5b** diastereomer 1.

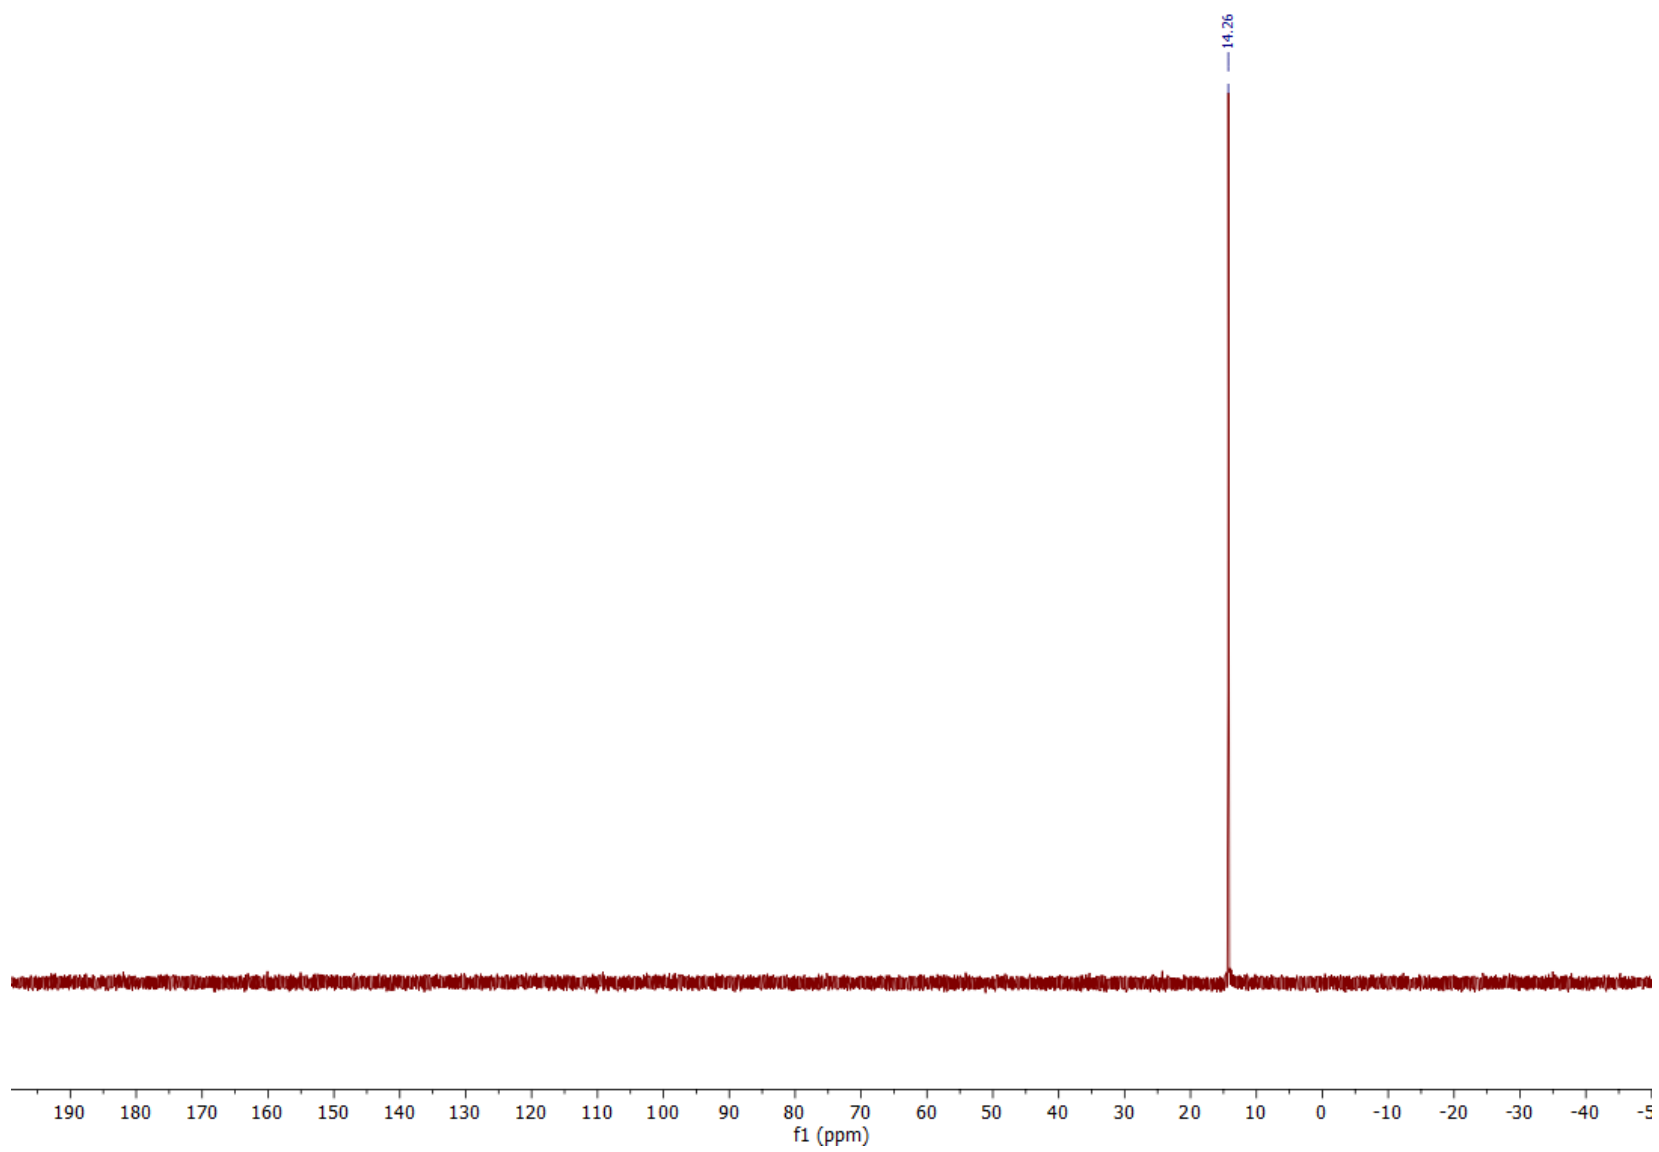

**Figure S92.**  $^{31}\text{P}$  NMR spectrum of **5b** diastereomer 1.

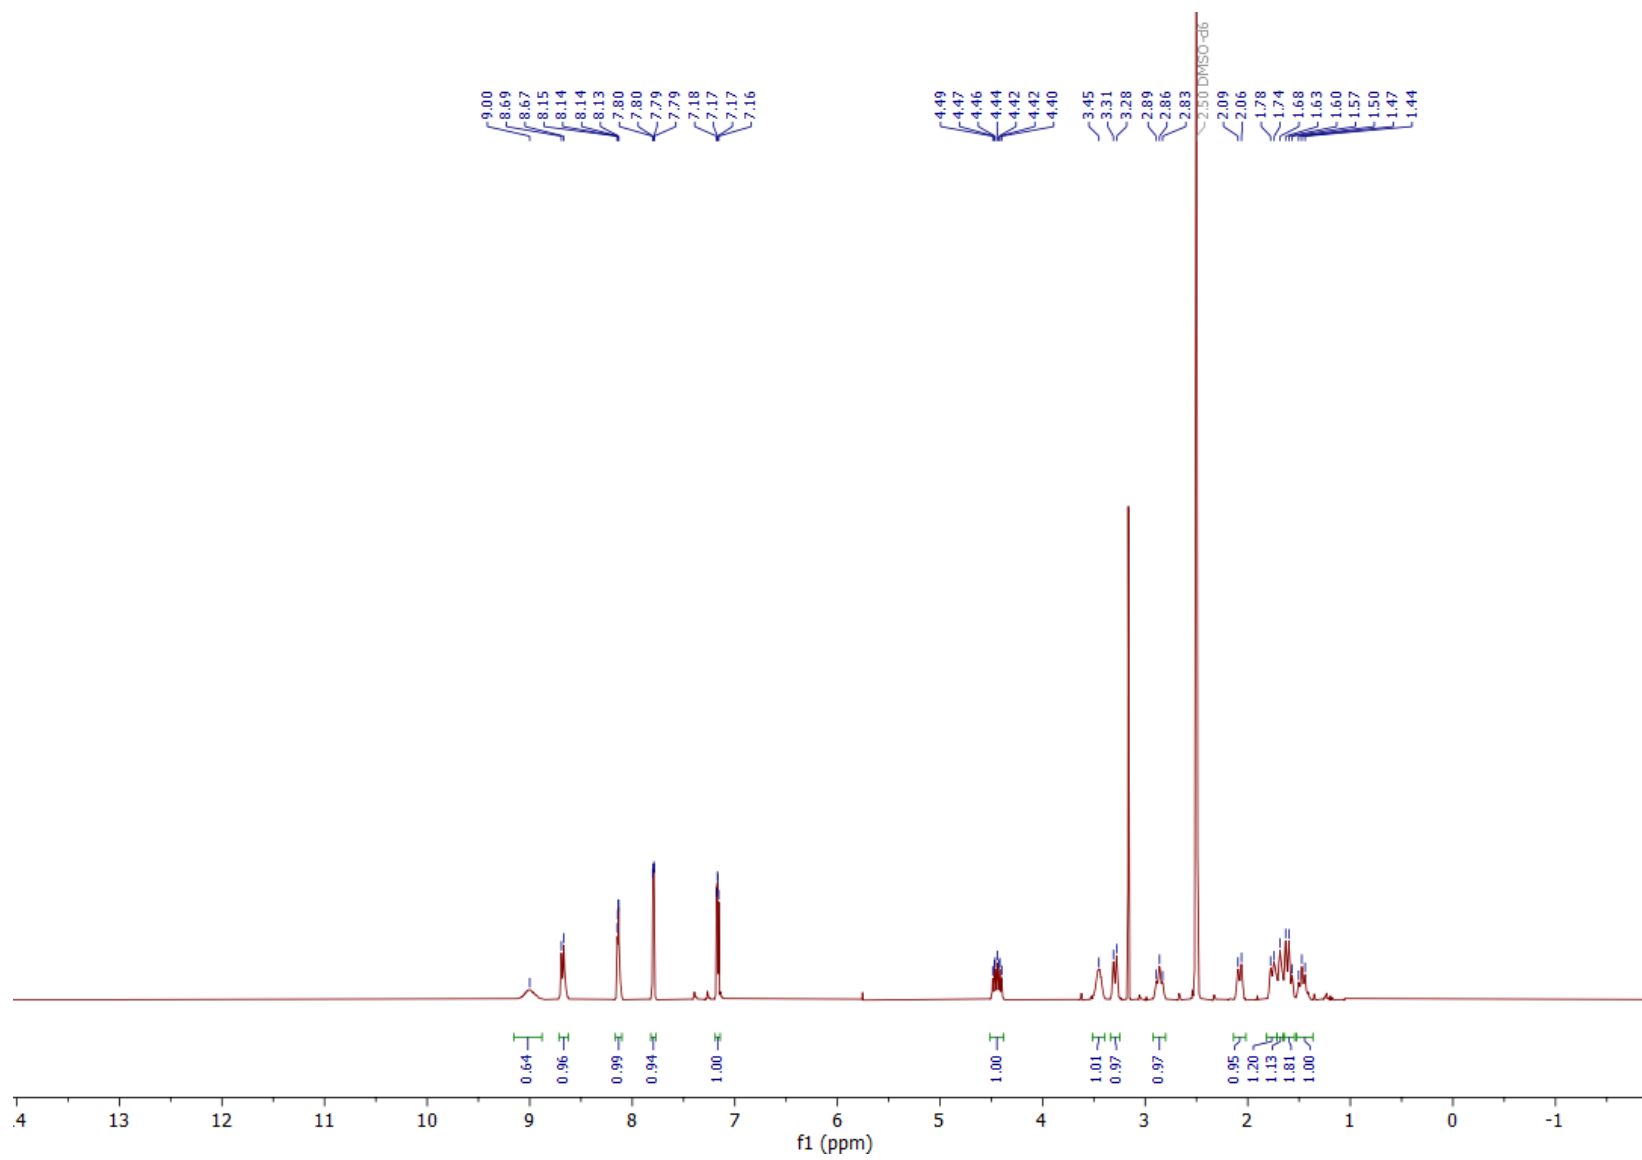

**Figure S93.** <sup>1</sup>H NMR spectrum of **5b** diastereomer 2.

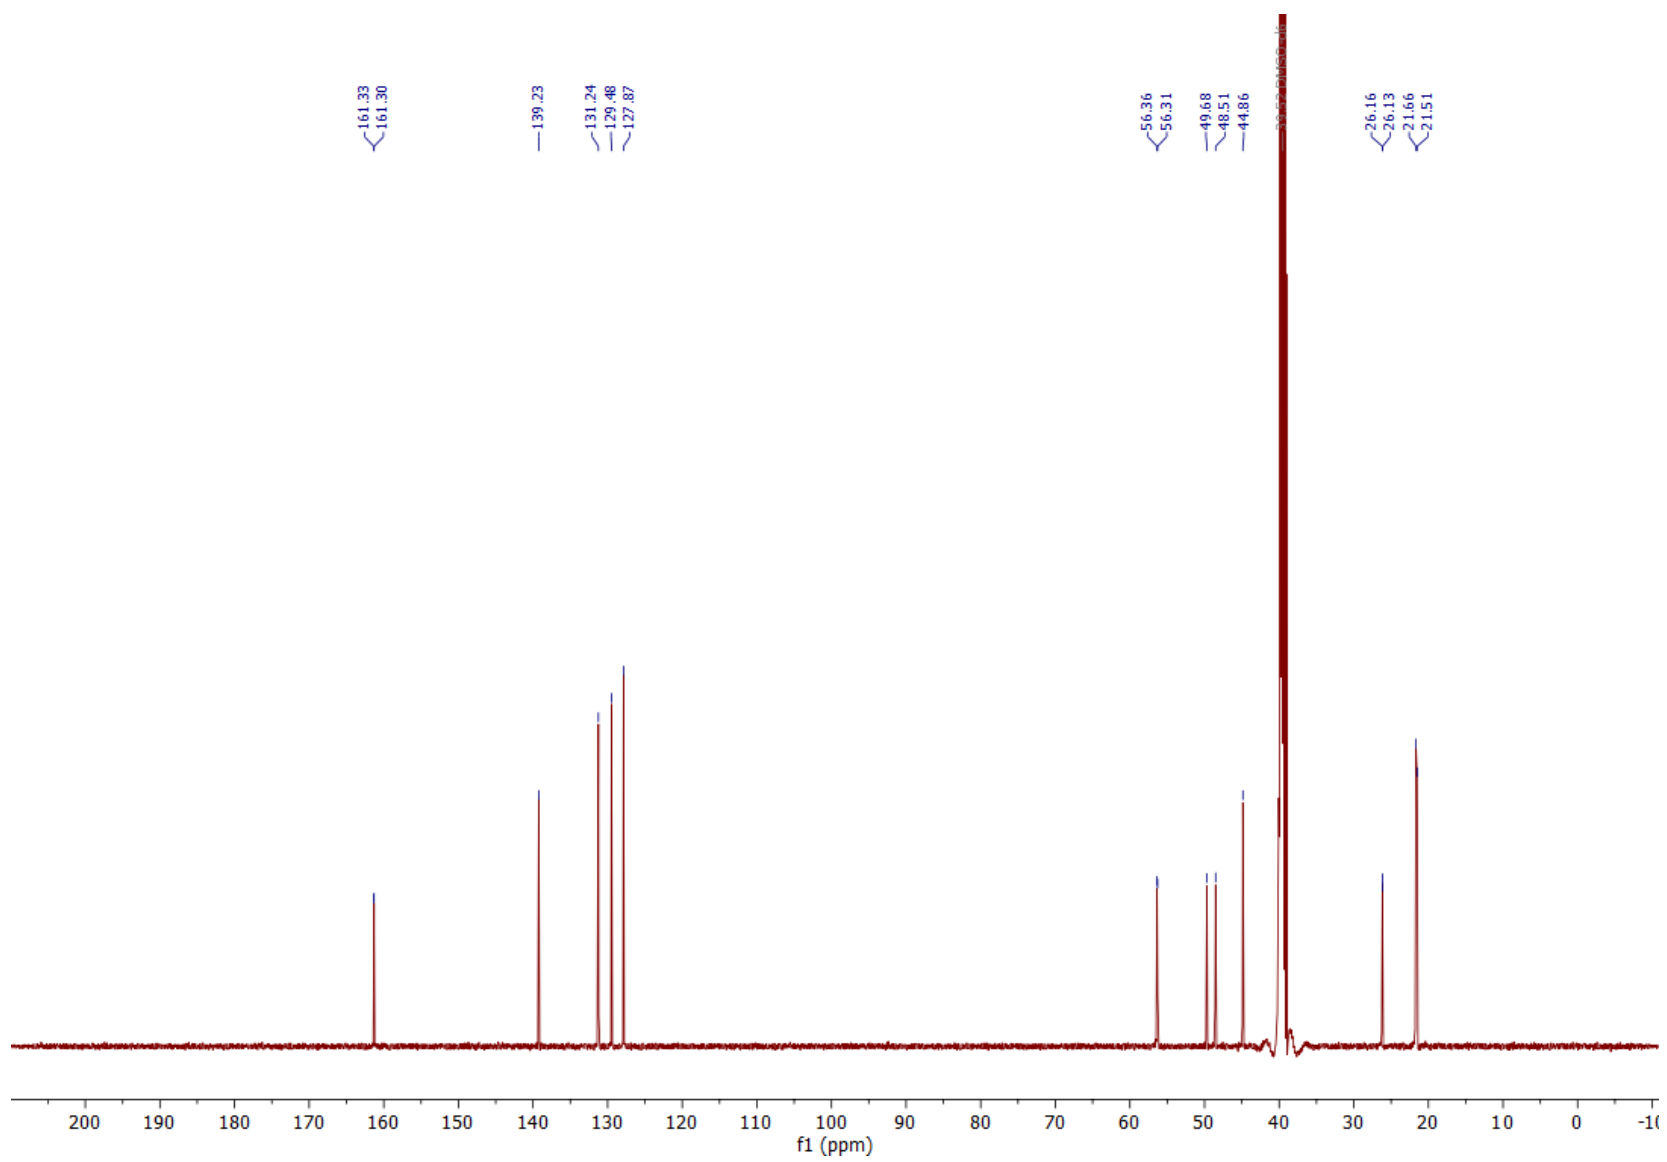

**Figure S94.** <sup>13</sup>C NMR spectrum of **5b** diastereomer 2.

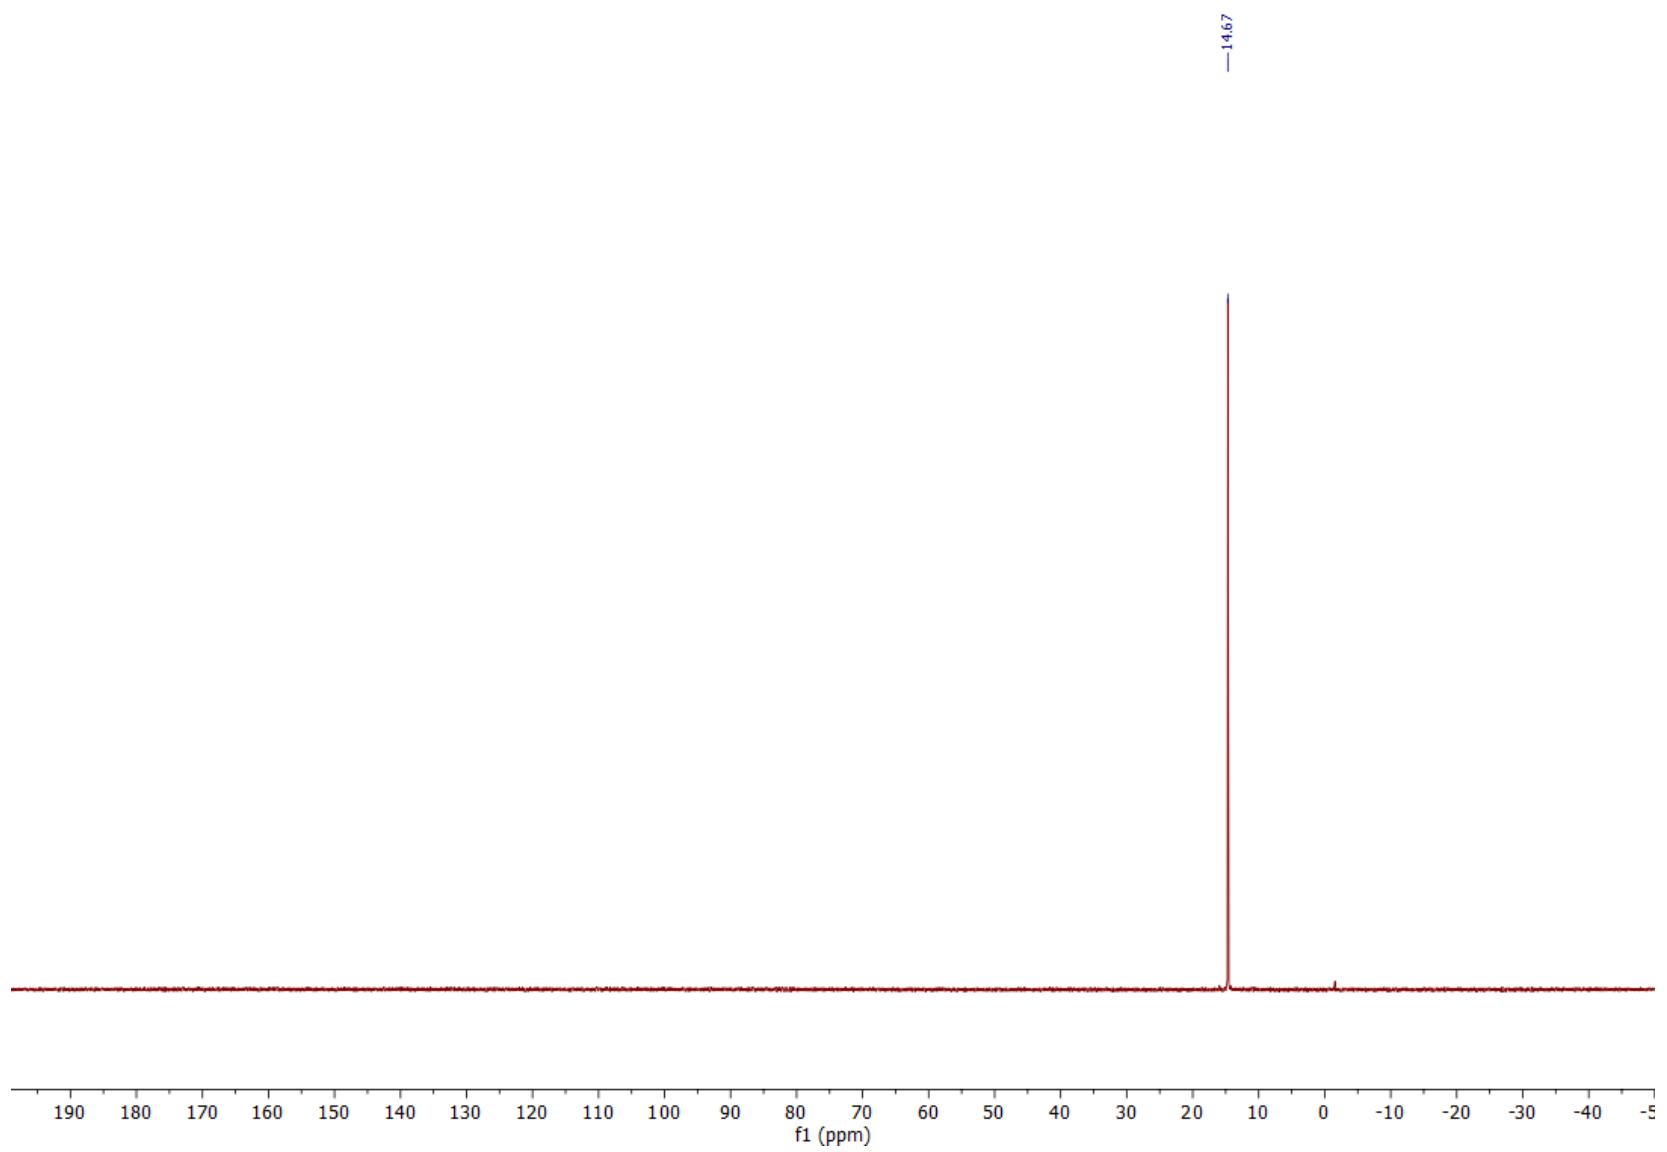

**Figure S95.**  $^{31}\text{P}$  NMR spectrum of **5b** diastereomer 2.

(Piperidin-2-yl(thiophene-3-carboxamido)methyl)phosphonic acid hydrochloride (**5c**)

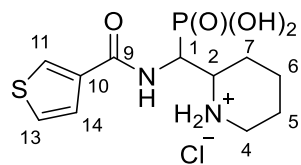

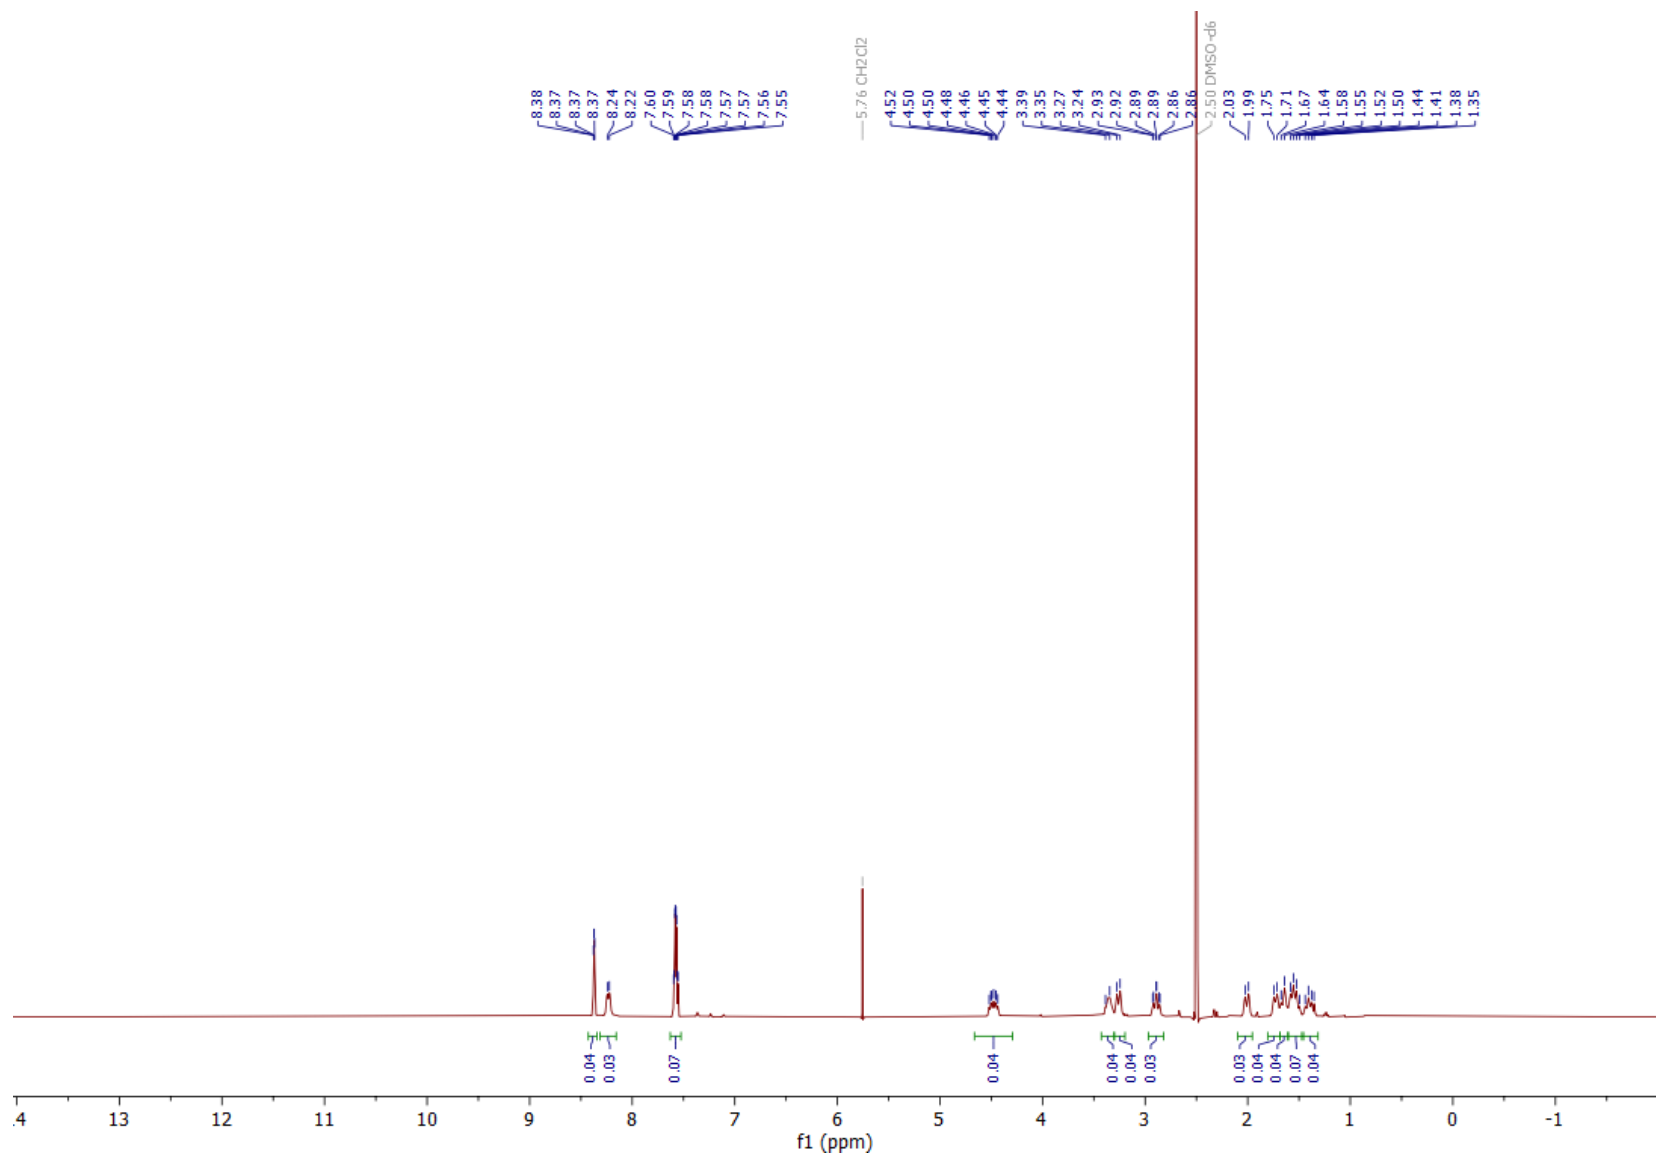

**Figure S96.** <sup>1</sup>H NMR spectrum of **5c** diastereomer 1.

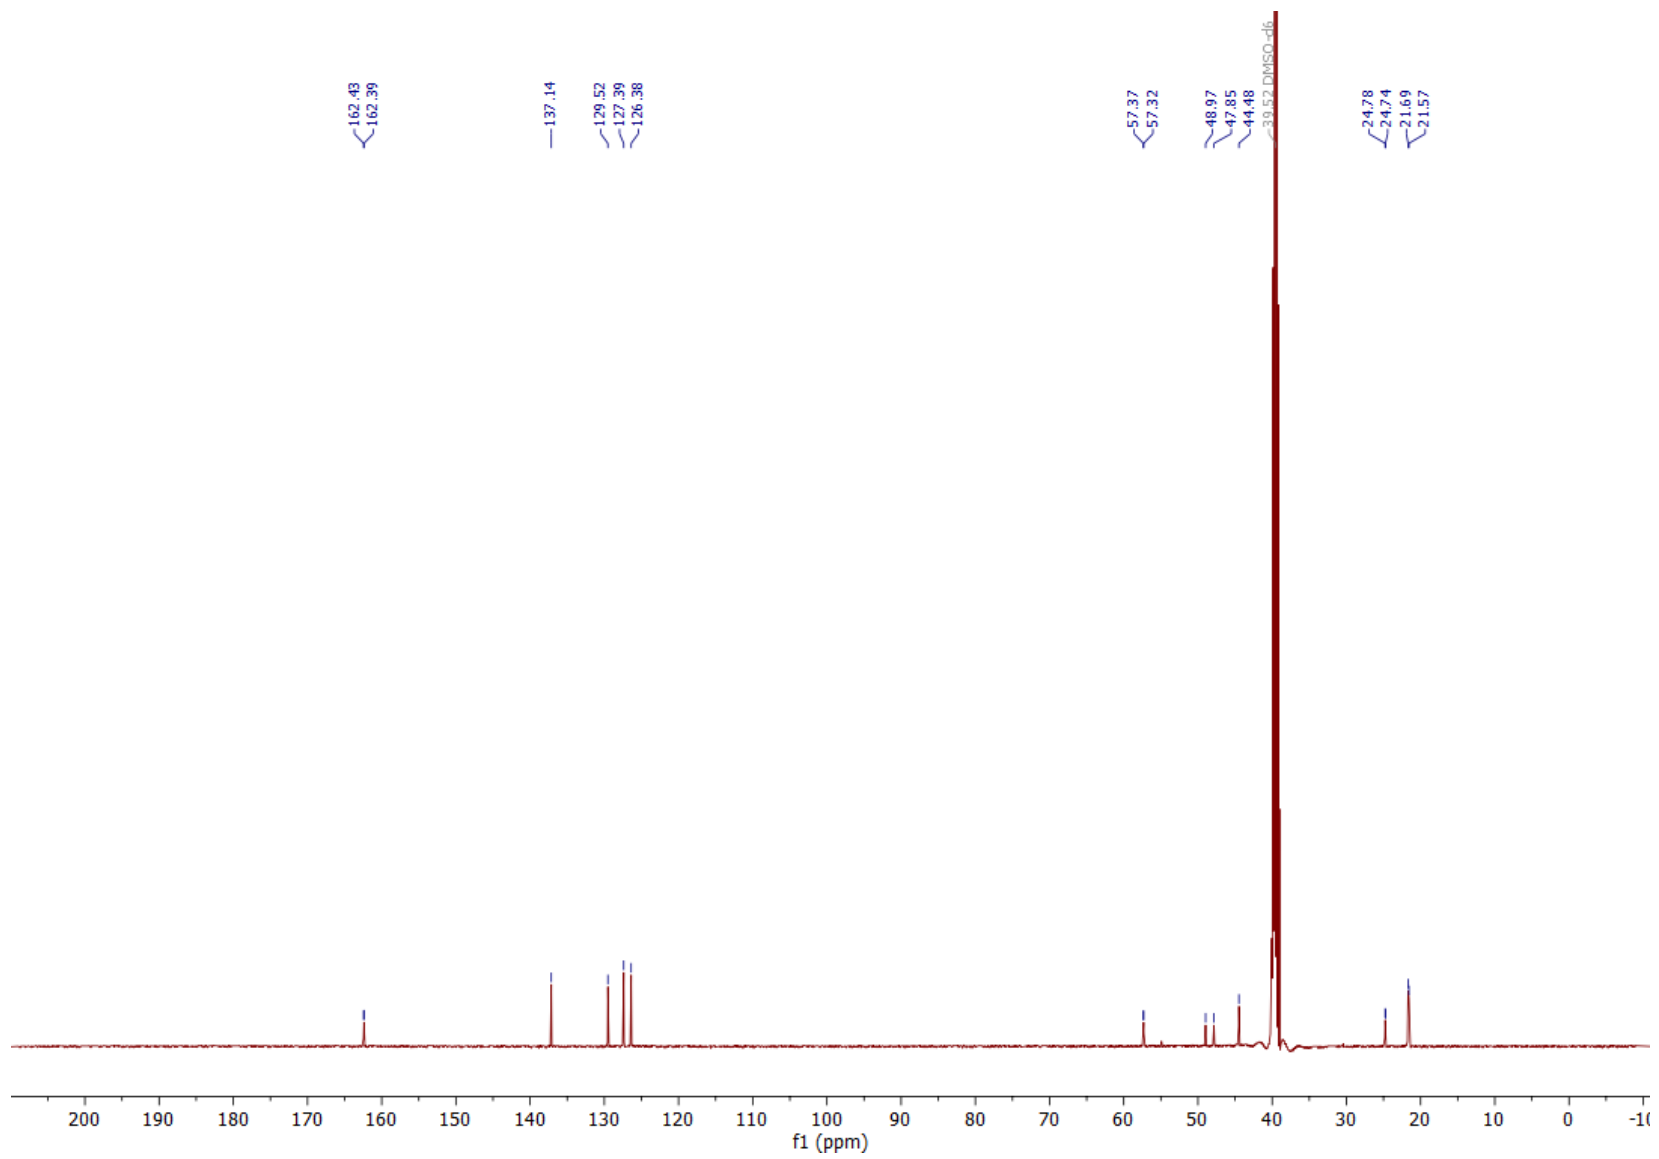

**Figure S97.** <sup>13</sup>C NMR spectrum of **5c** diastereomer 1.



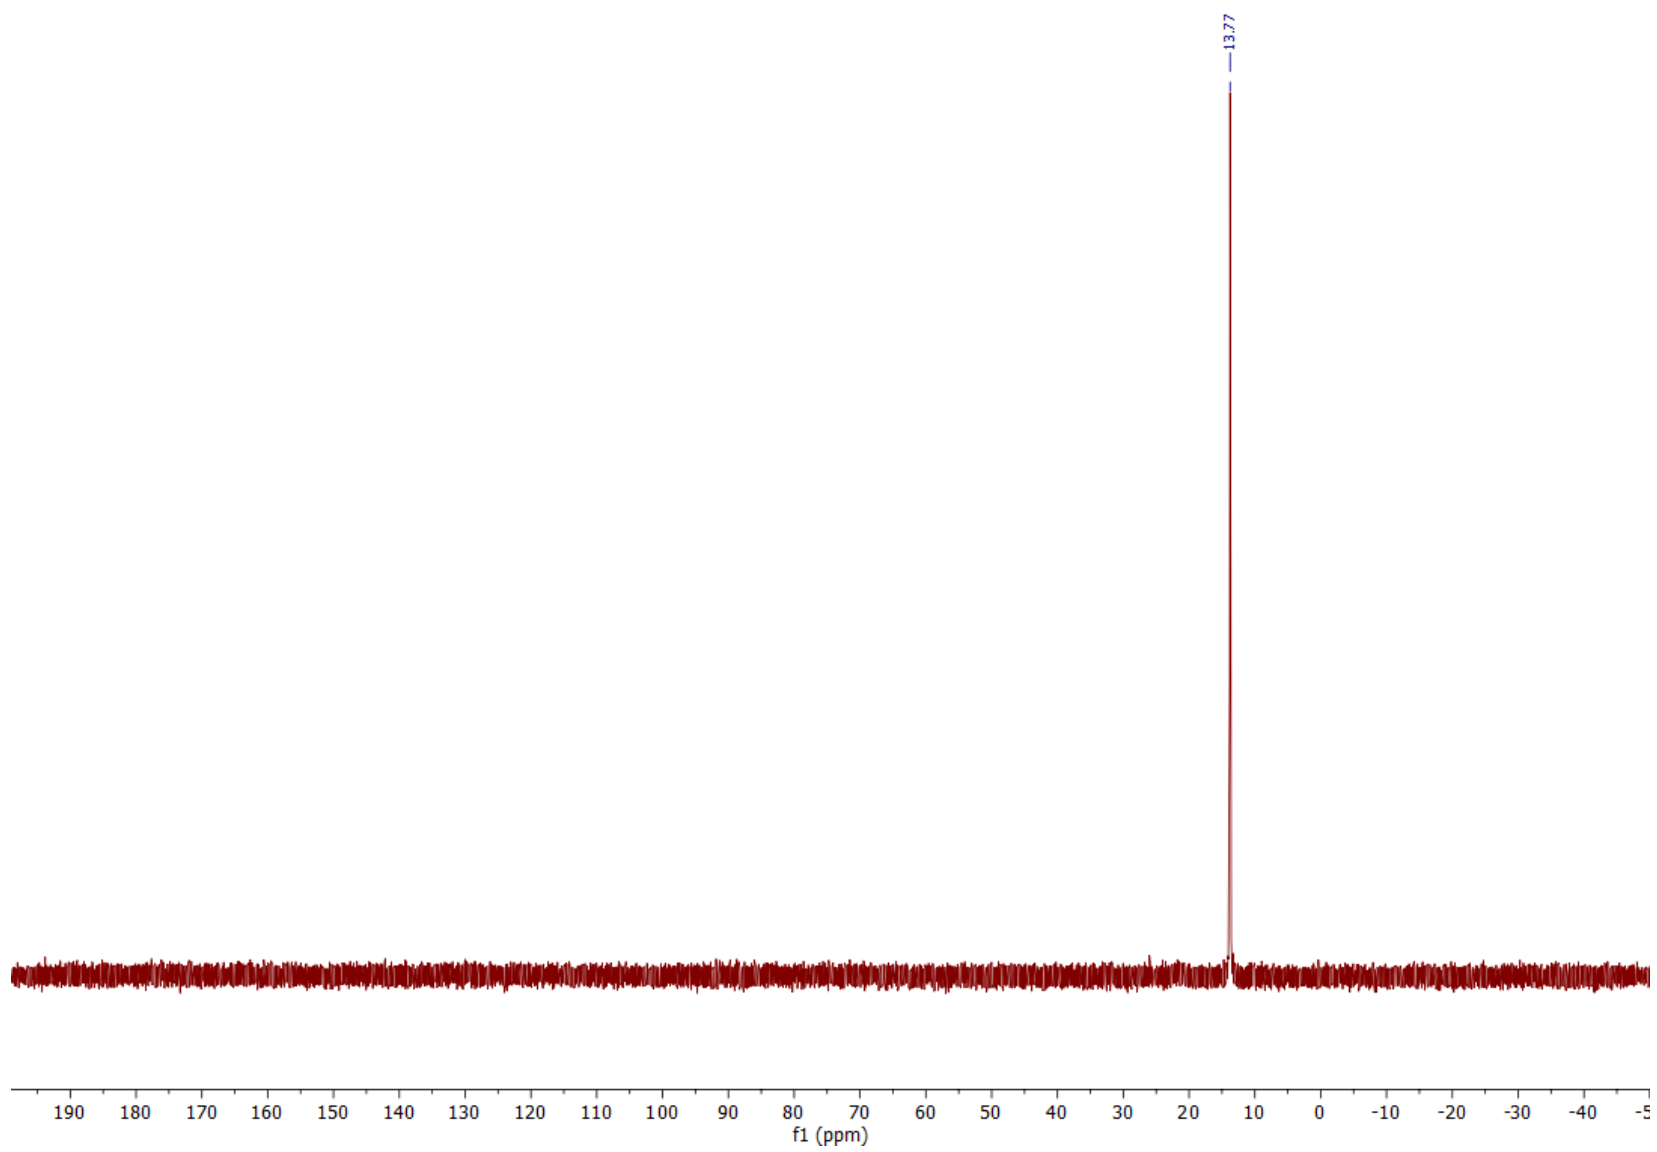

**Figure S98.**  $^{31}\text{P}$  NMR spectrum of **5c** diastereomer 1.

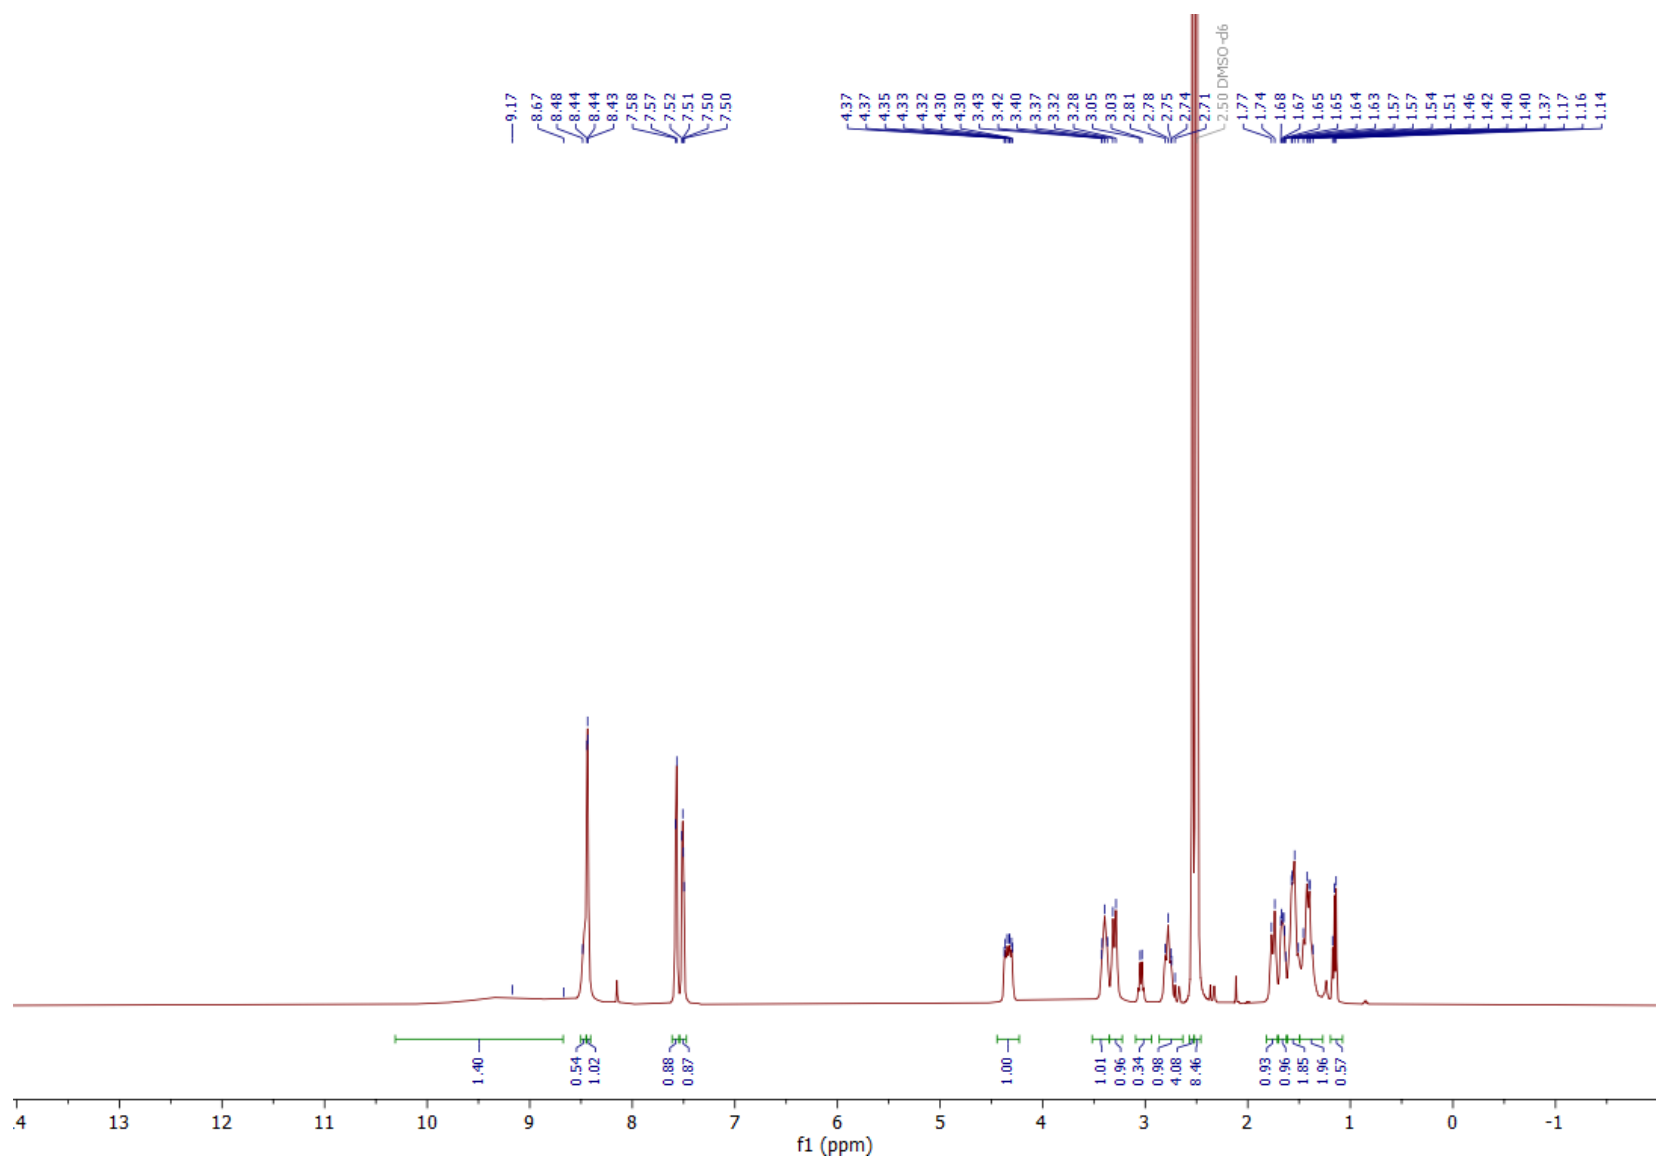

**Figure S99.**  $^1\text{H}$  NMR spectrum of **5c** diastereomer 2.

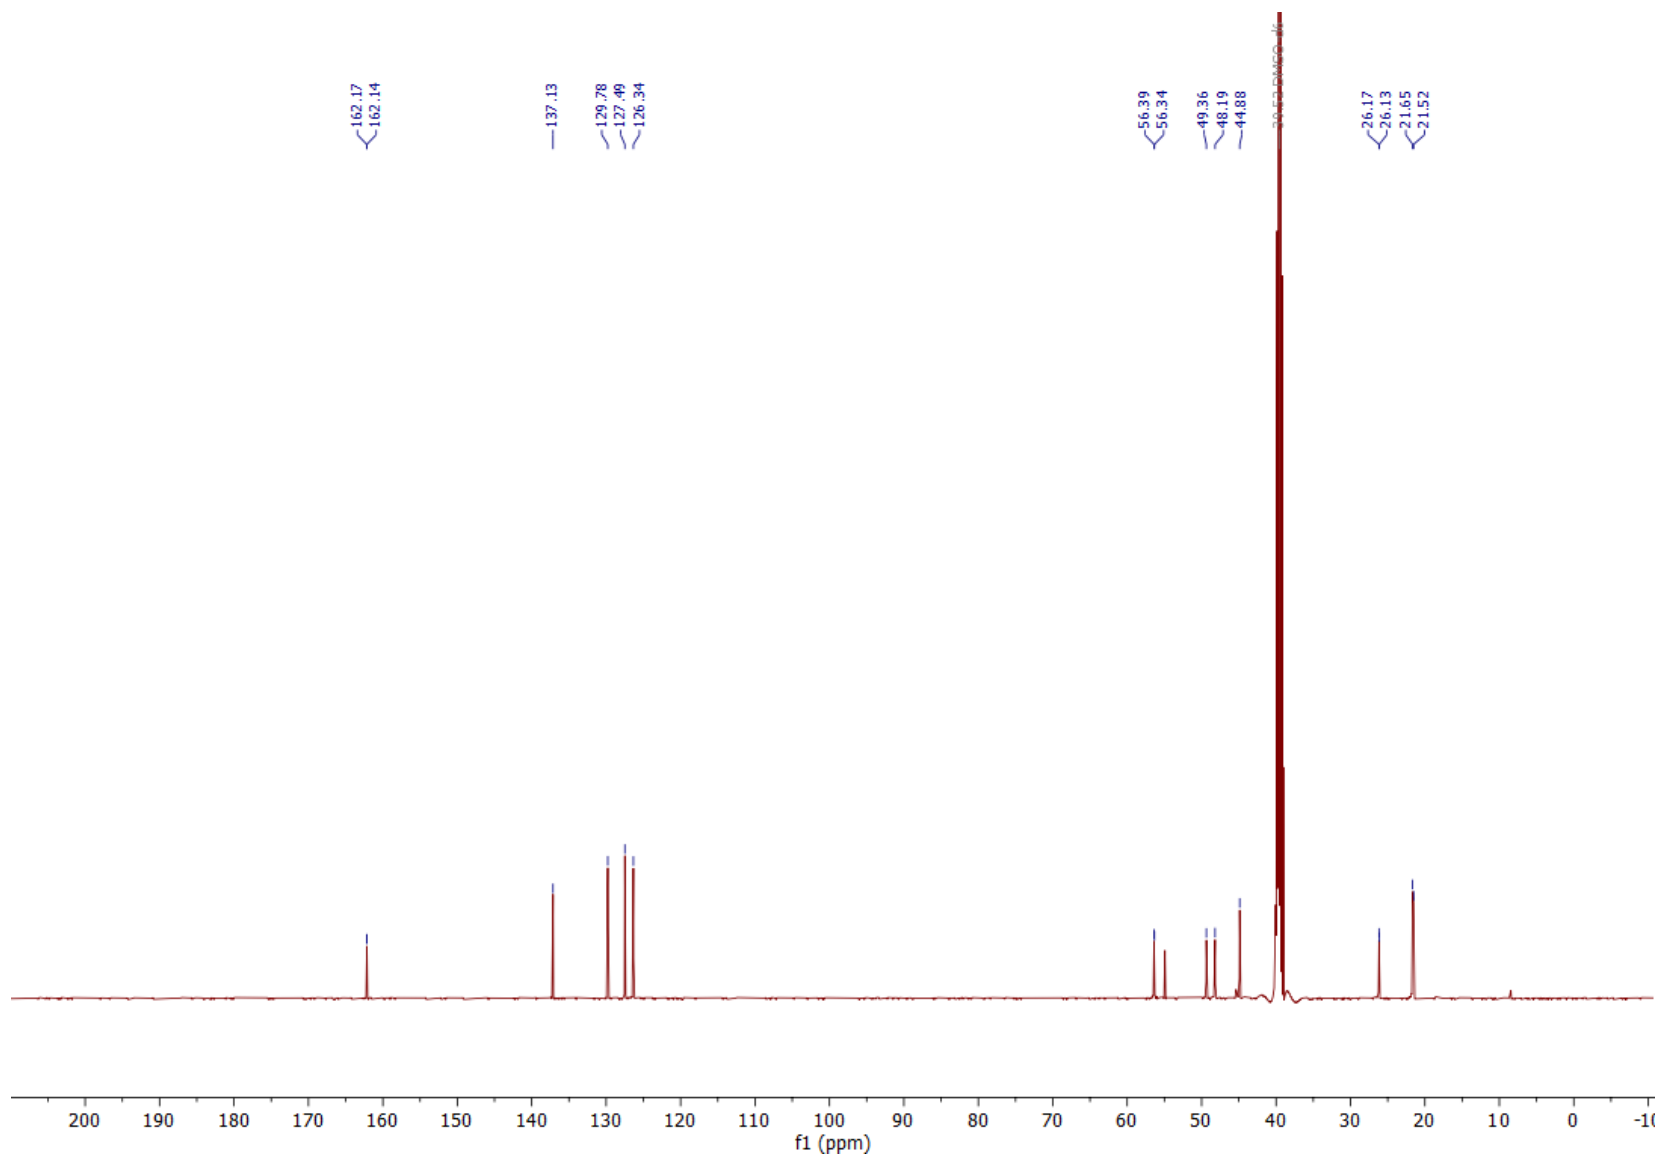

**Figure S100.** <sup>13</sup>C NMR spectrum of **5c** diastereomer 2.

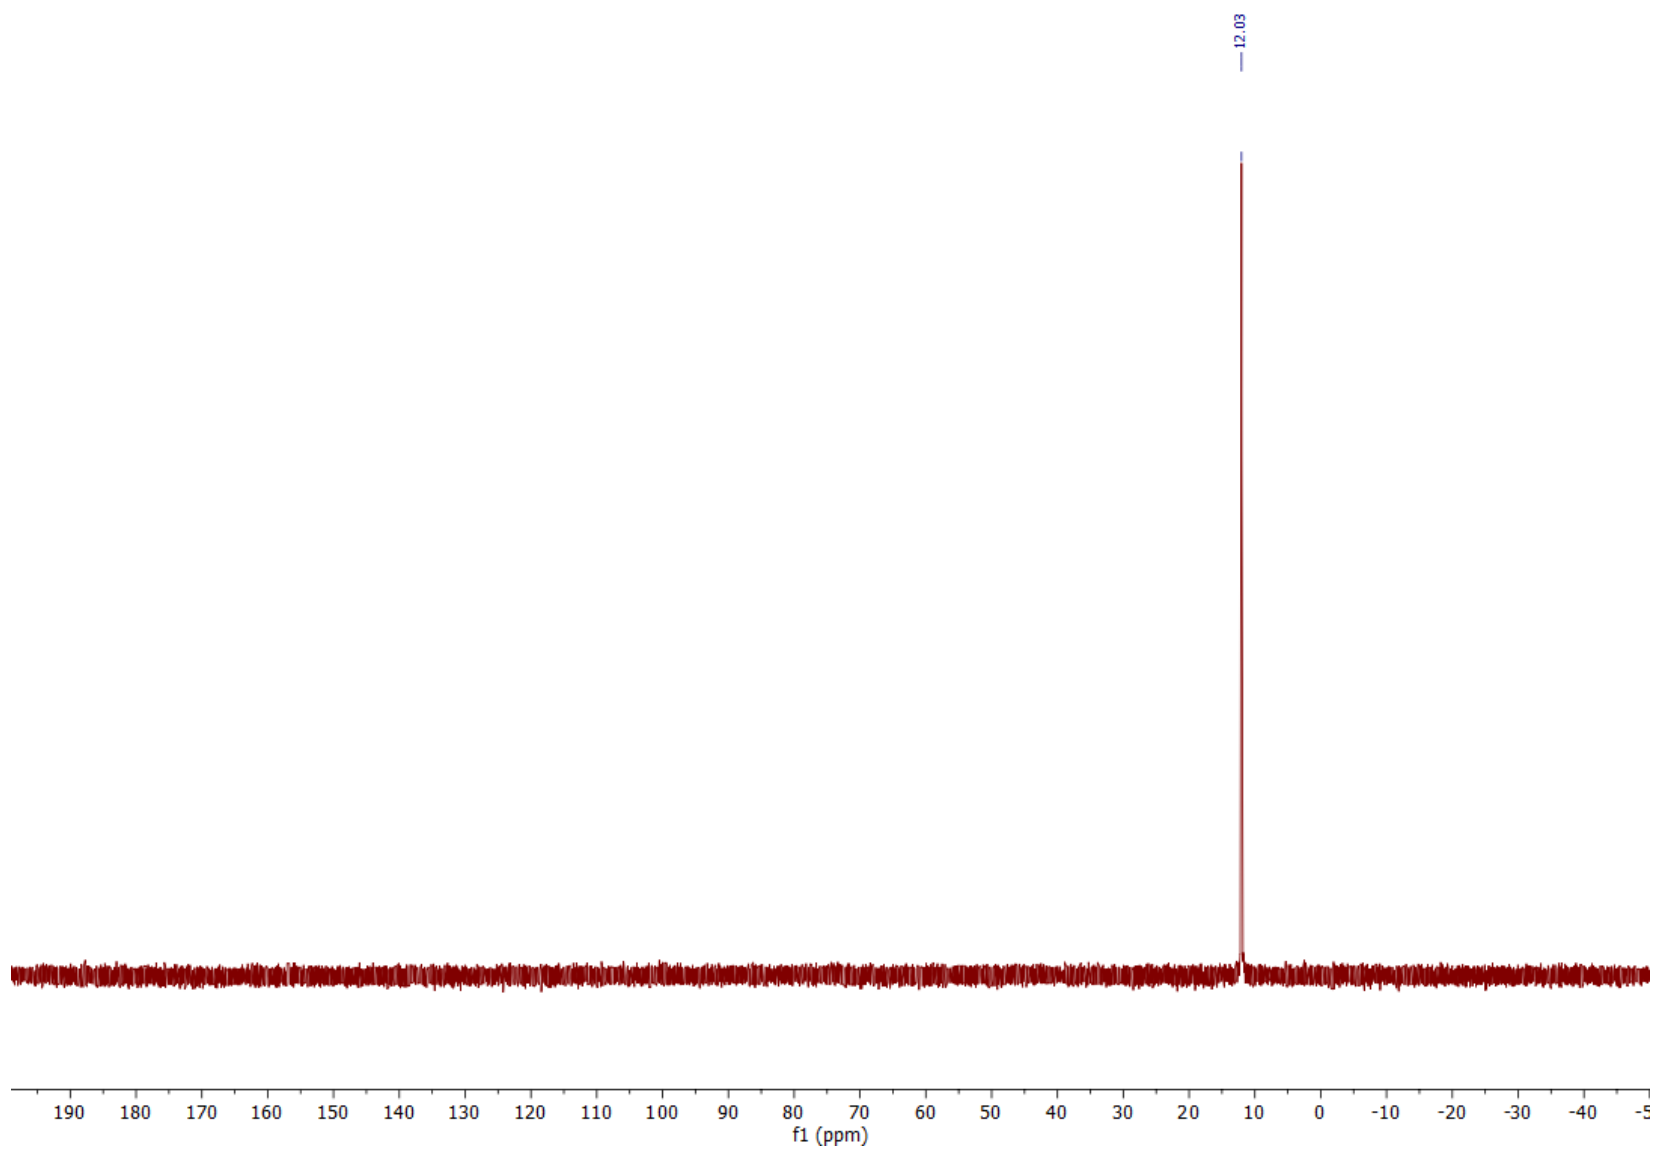

**Figure S101.**  $^{31}\text{P}$  NMR spectrum of **5c** diastereomer 2.

(Piperidin-2-yl(4,5,6,7-tetrahydrobenzo[*b*]thiophene-2-carboxamido)methyl)phosphonic acid hydrochloride (**5d**)

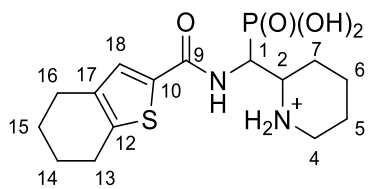

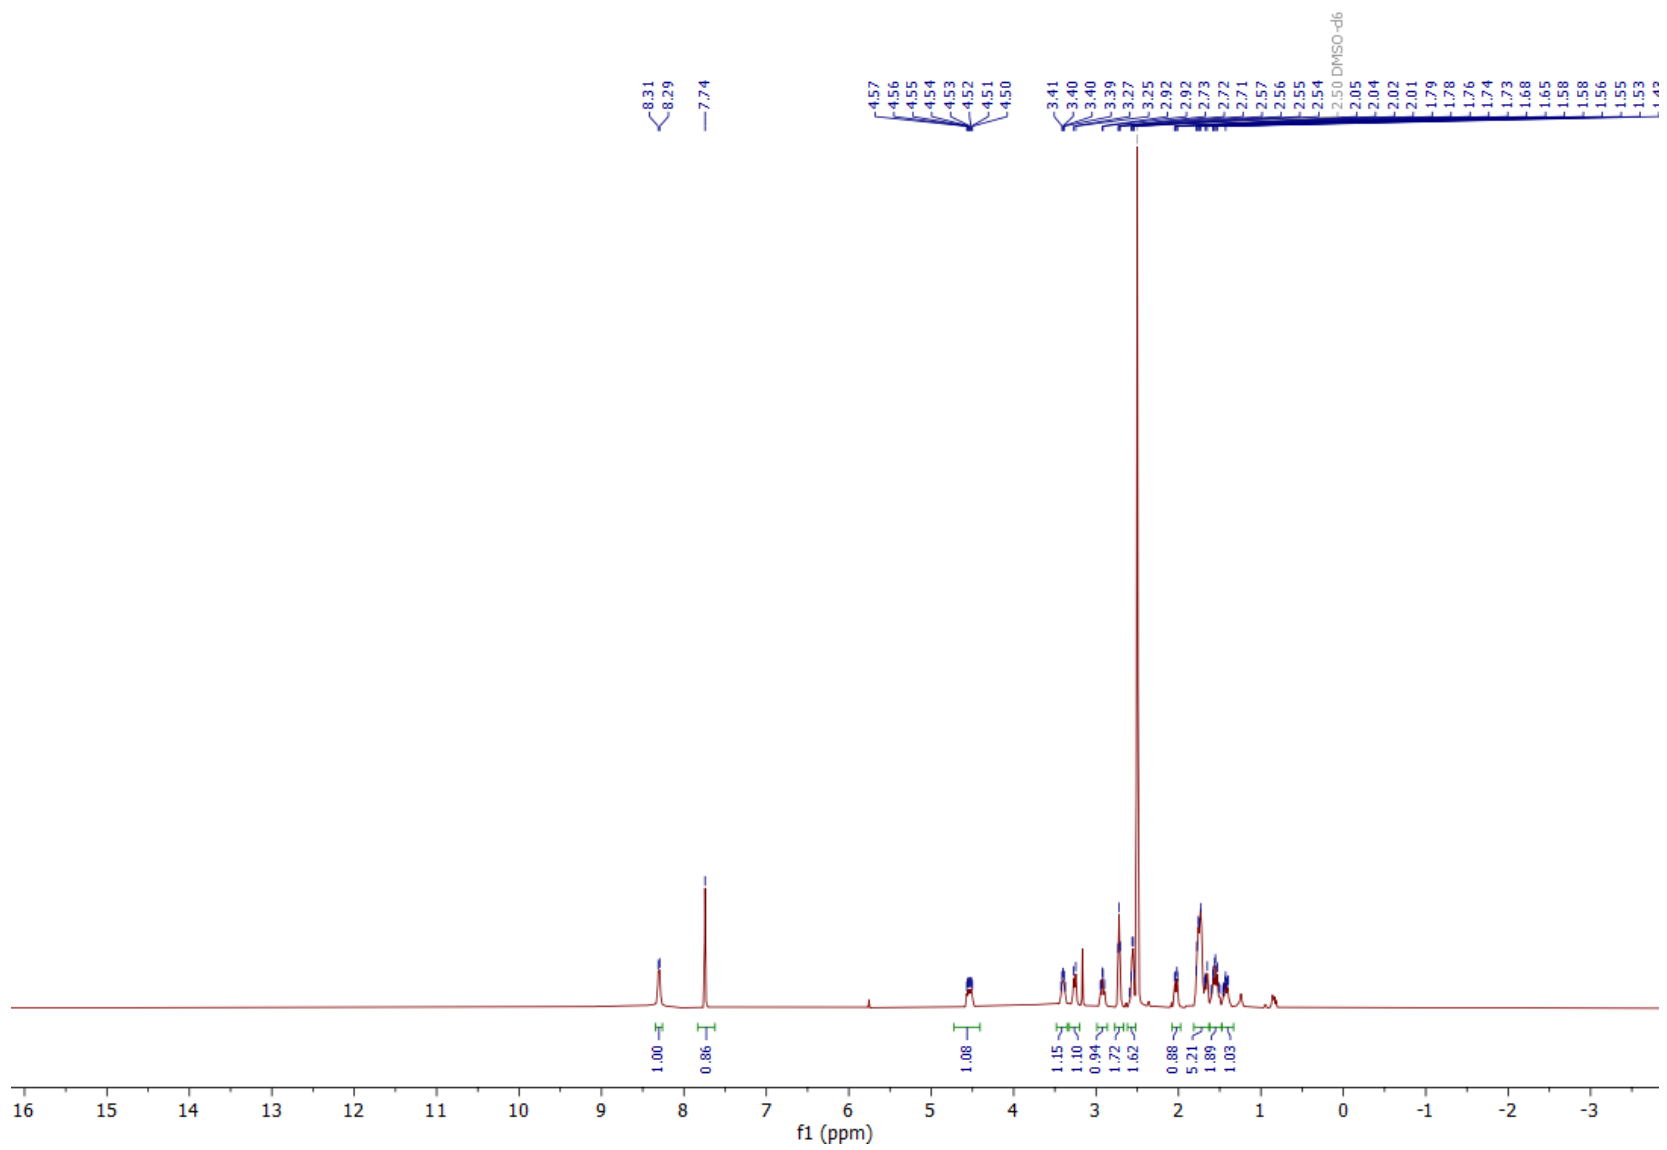

**Figure S102.** <sup>1</sup>H NMR spectrum of **5d** diastereomer 1.

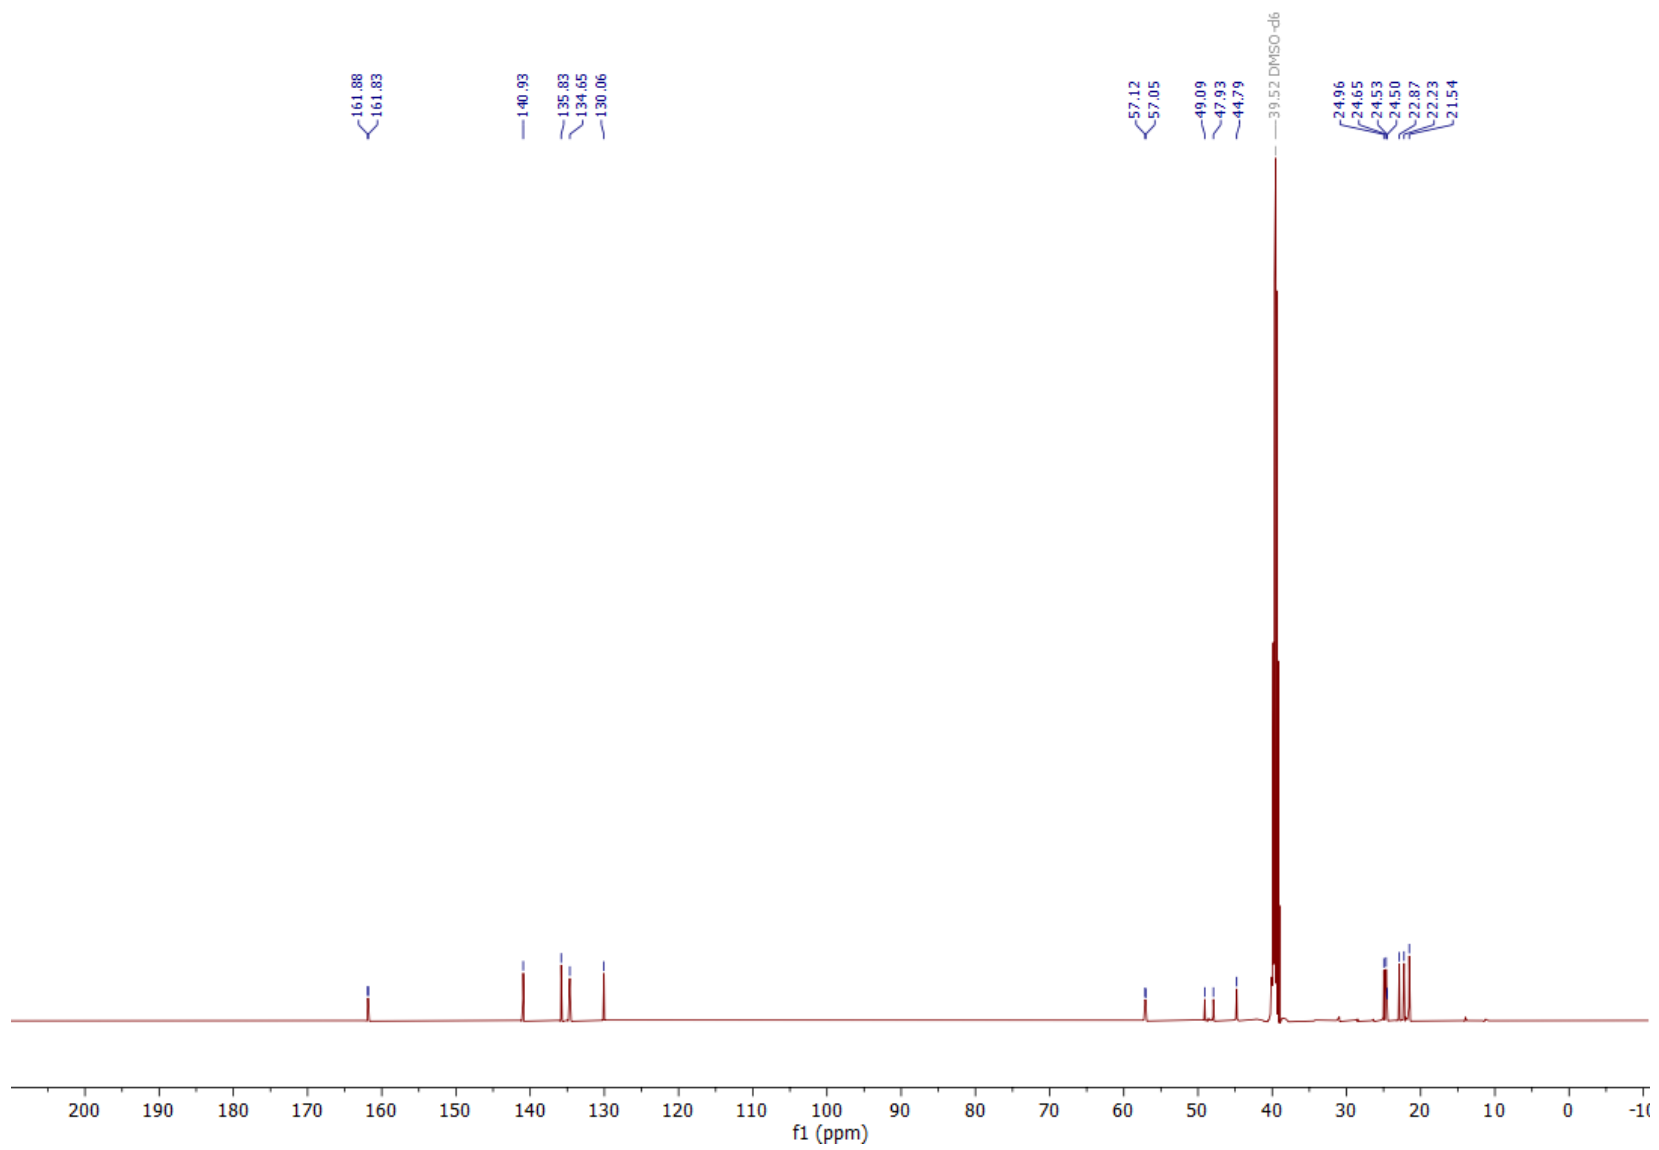

**Figure S103.** <sup>13</sup>C NMR spectrum of **5d** diastereomer 1.

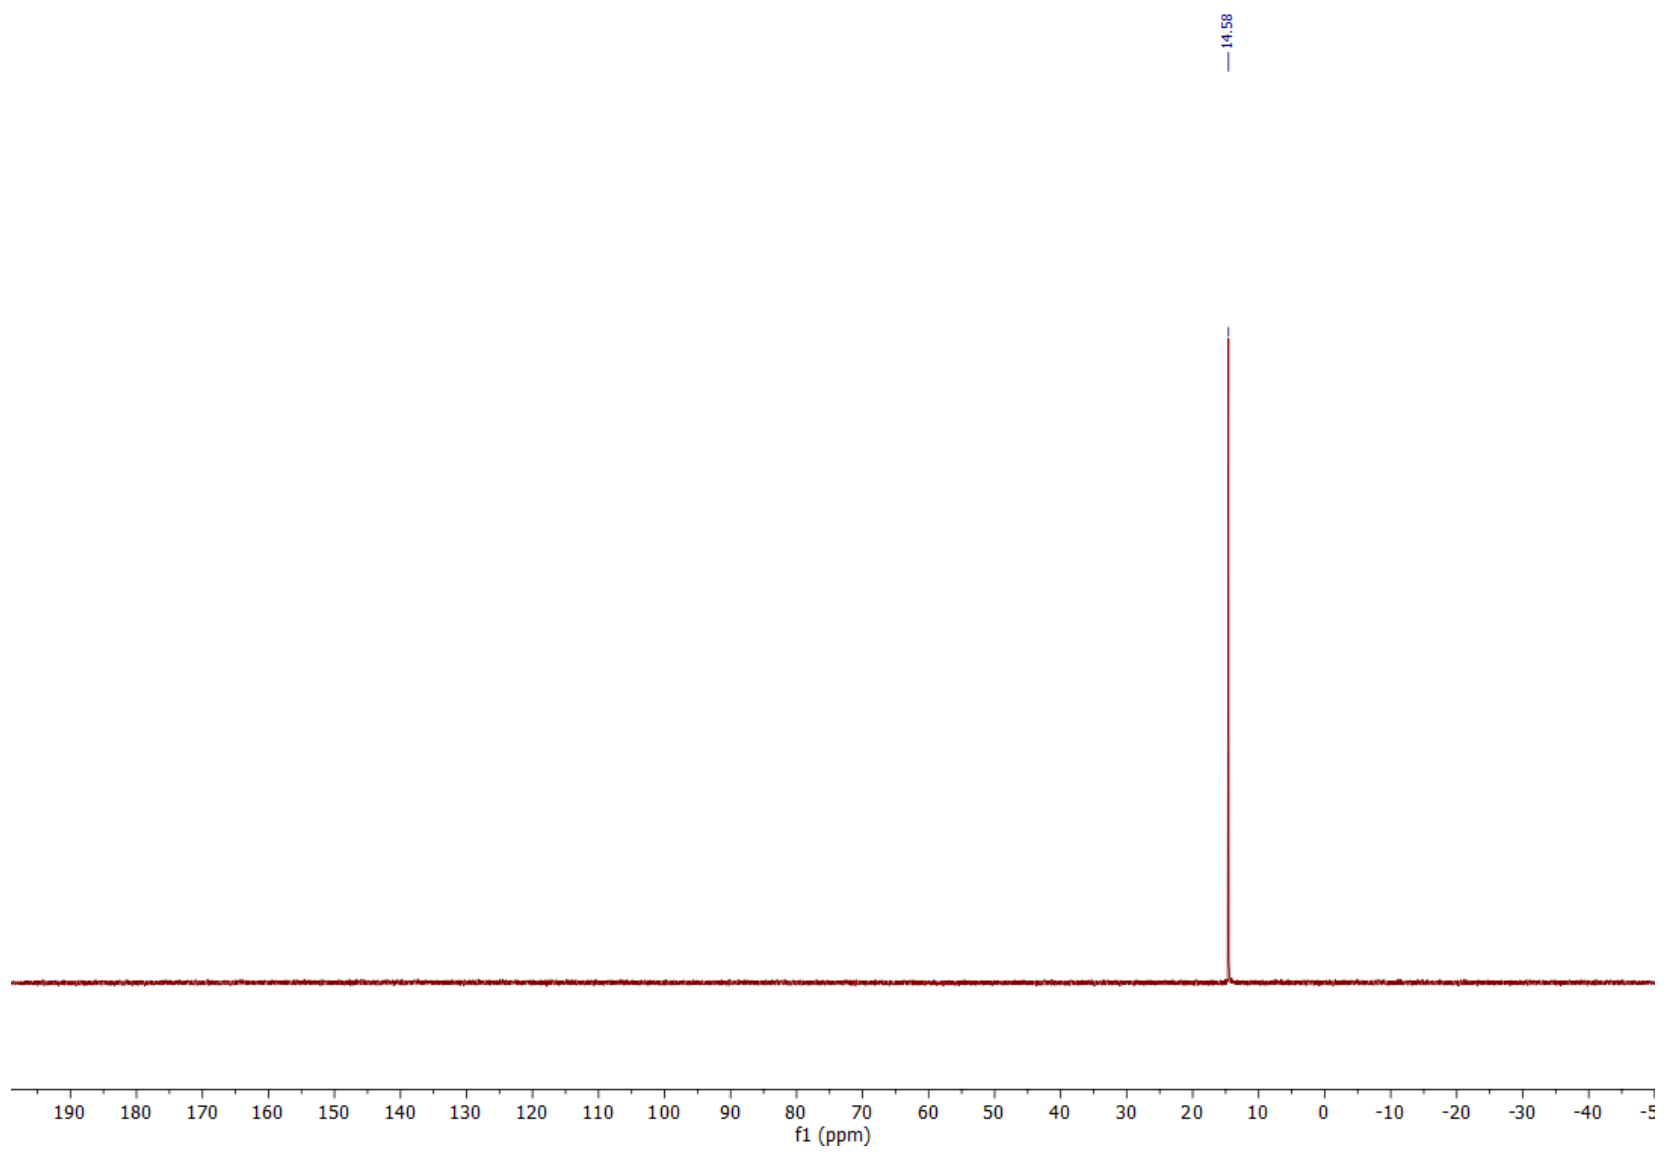

**Figure S104.**  $^{31}\text{P}$  NMR spectrum of **5d** diastereomer 1.



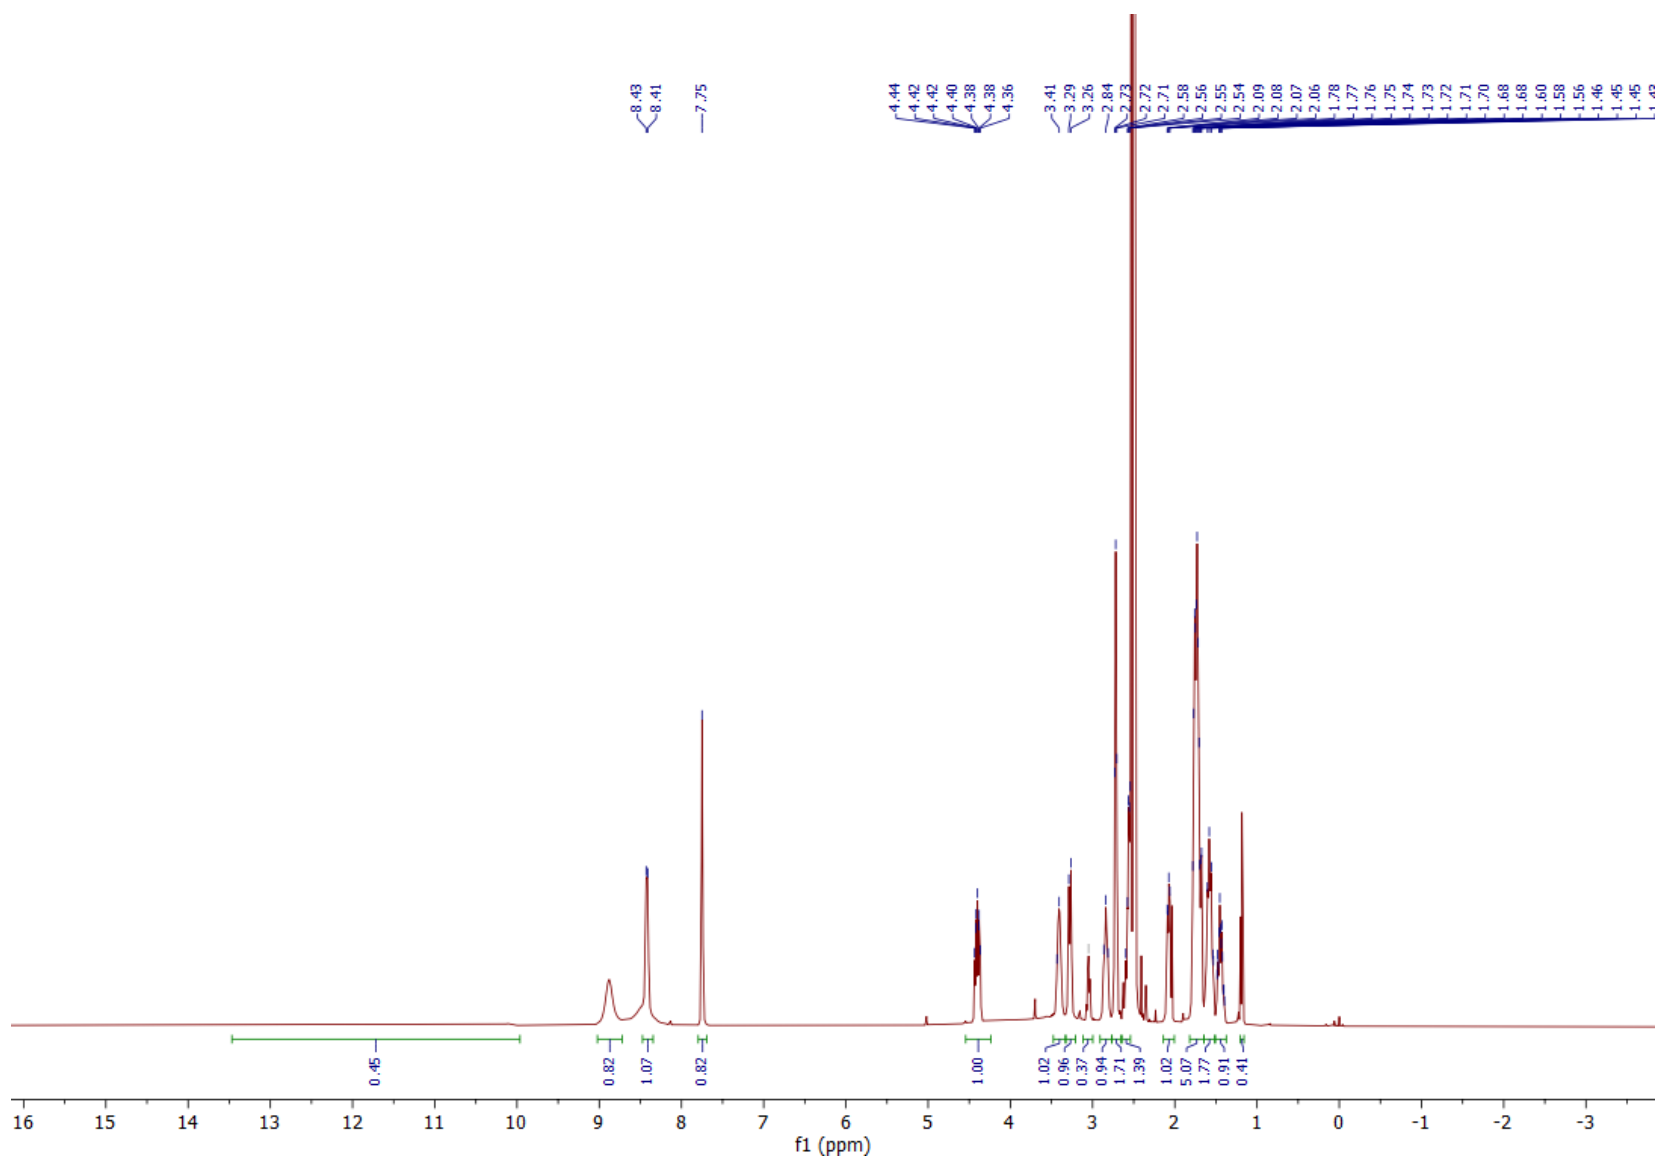

**Figure S105.**  $^1\text{H}$  NMR spectrum of **5d** diastereomer 2.

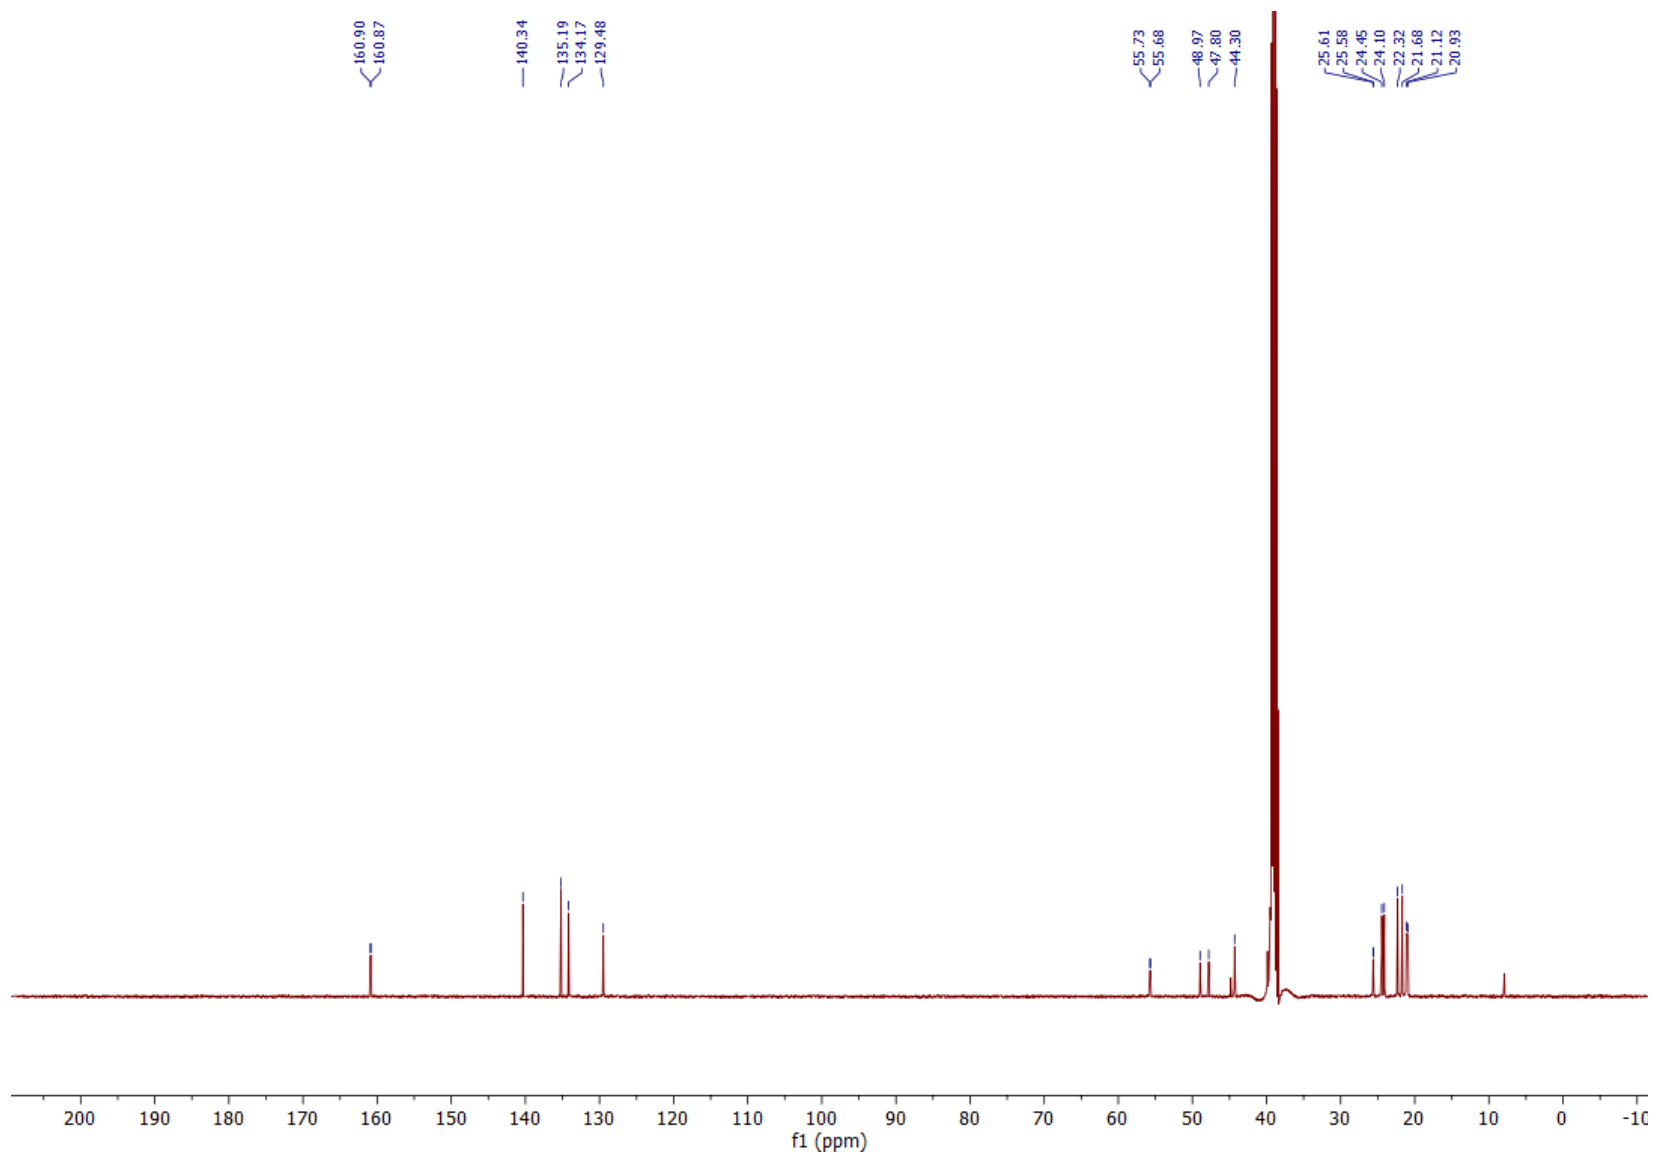

**Figure S106.** <sup>13</sup>C NMR spectrum of **5d** diastereomer 2.

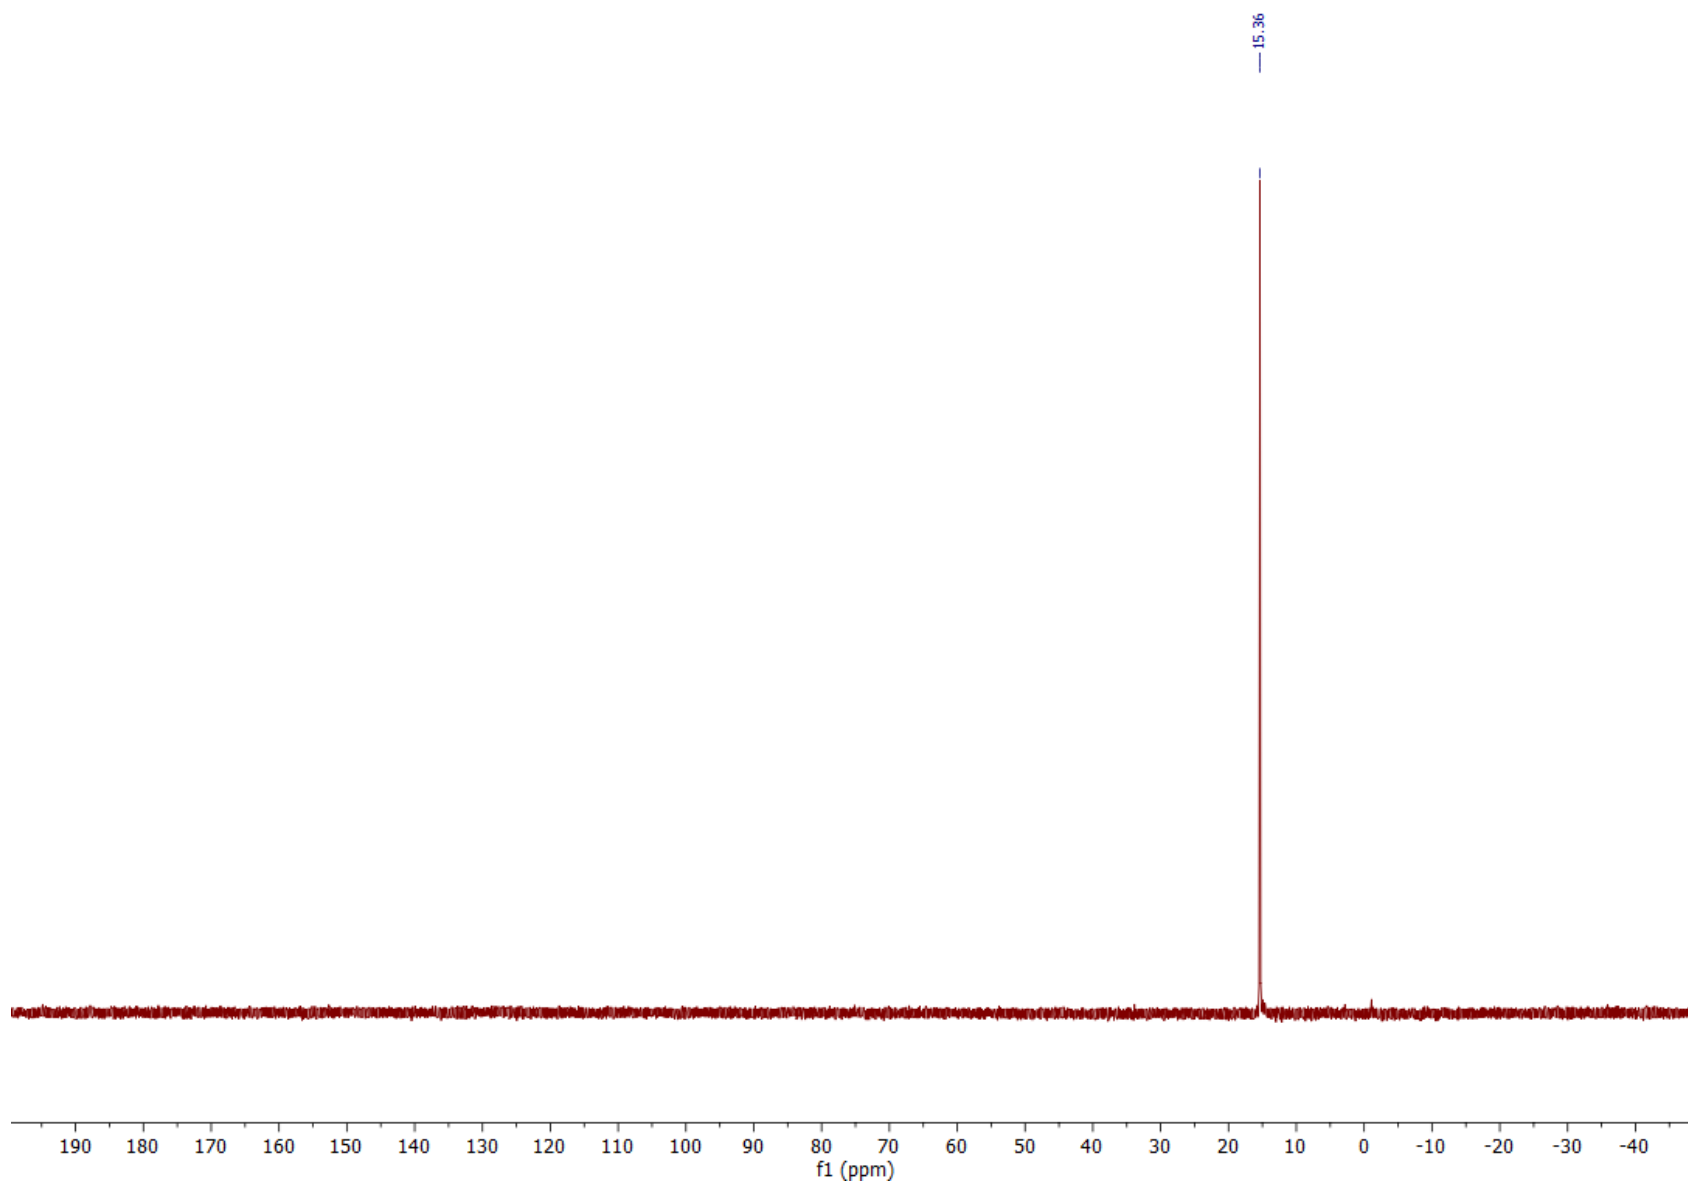

**Figure S107.**  $^{31}\text{P}$  NMR spectrum of **5d** diastereomer 2.

(Piperidin-2-yl(4,5,6,7-tetrahydrobenzo[*b*]thiophene-3-carboxamido)methyl)phosphonic acid hydrochloride (**5e**)

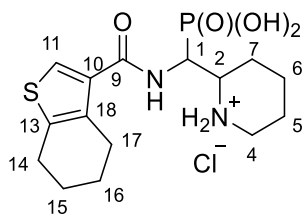

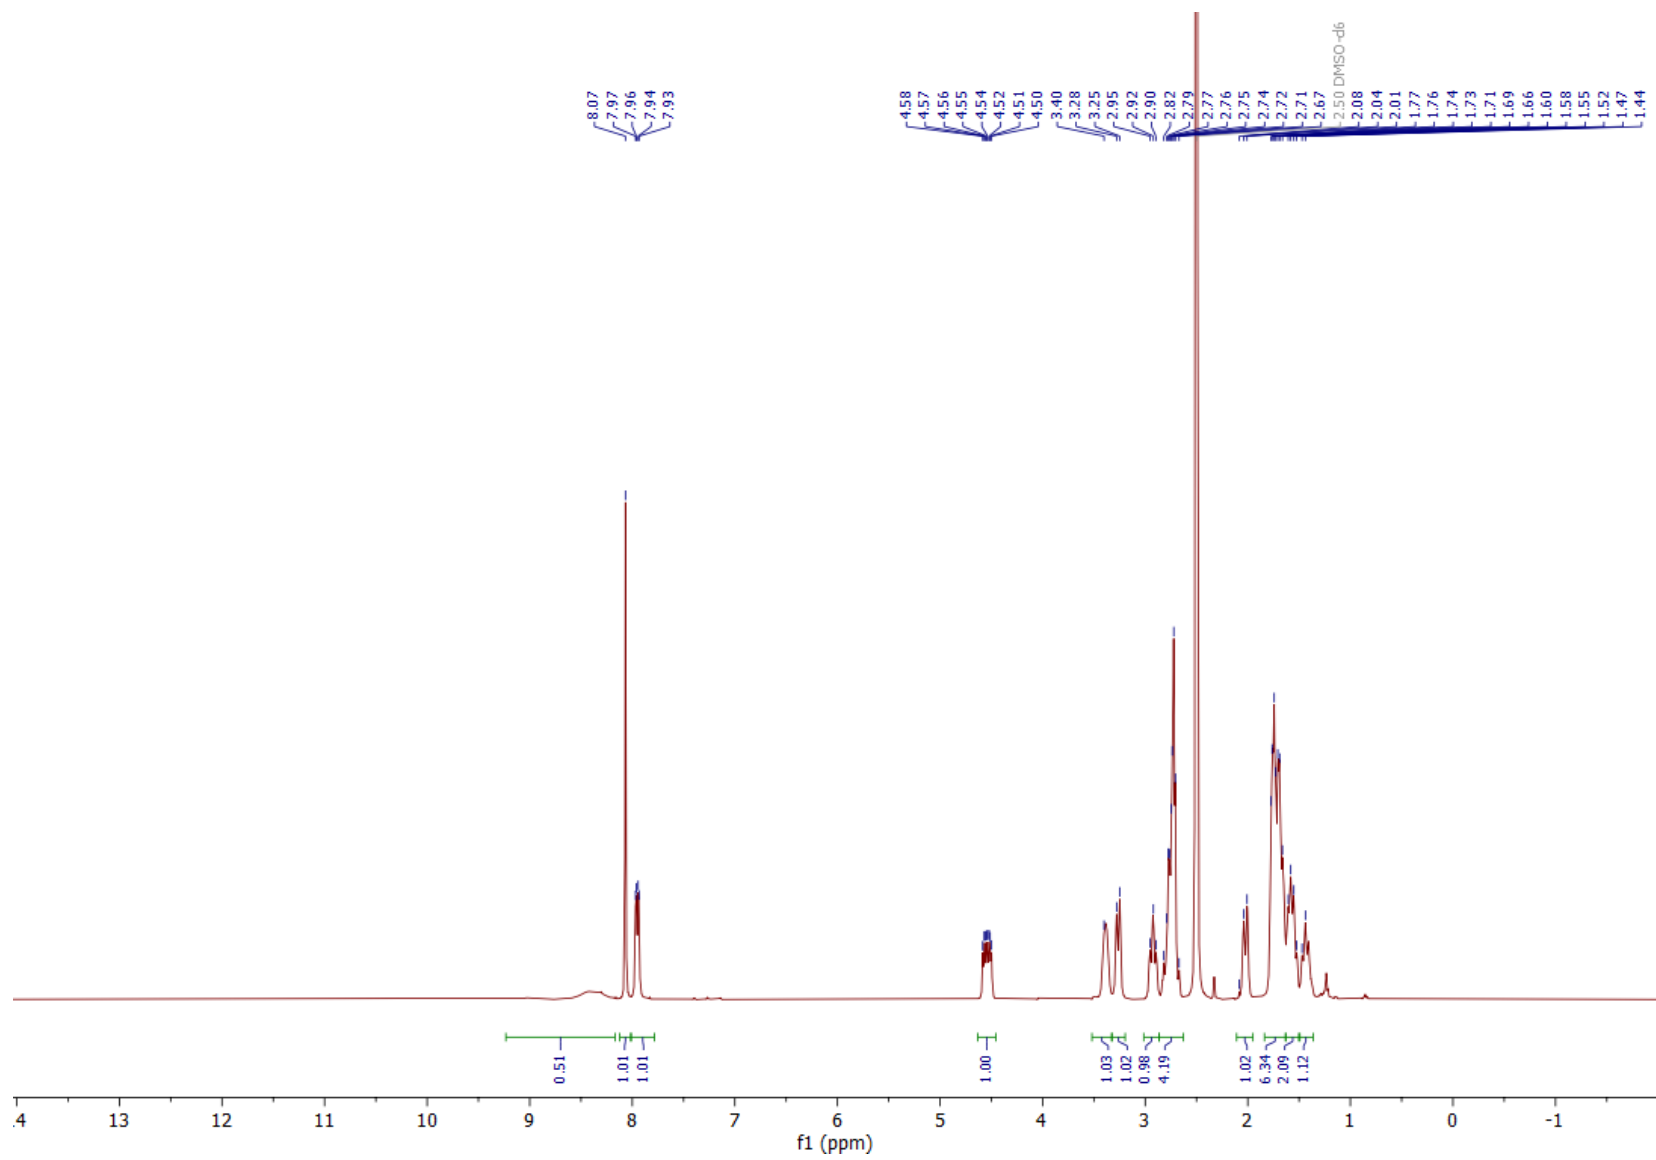

Figure S108.  $^1\text{H}$  NMR spectrum of **5e** diastereomer 1.

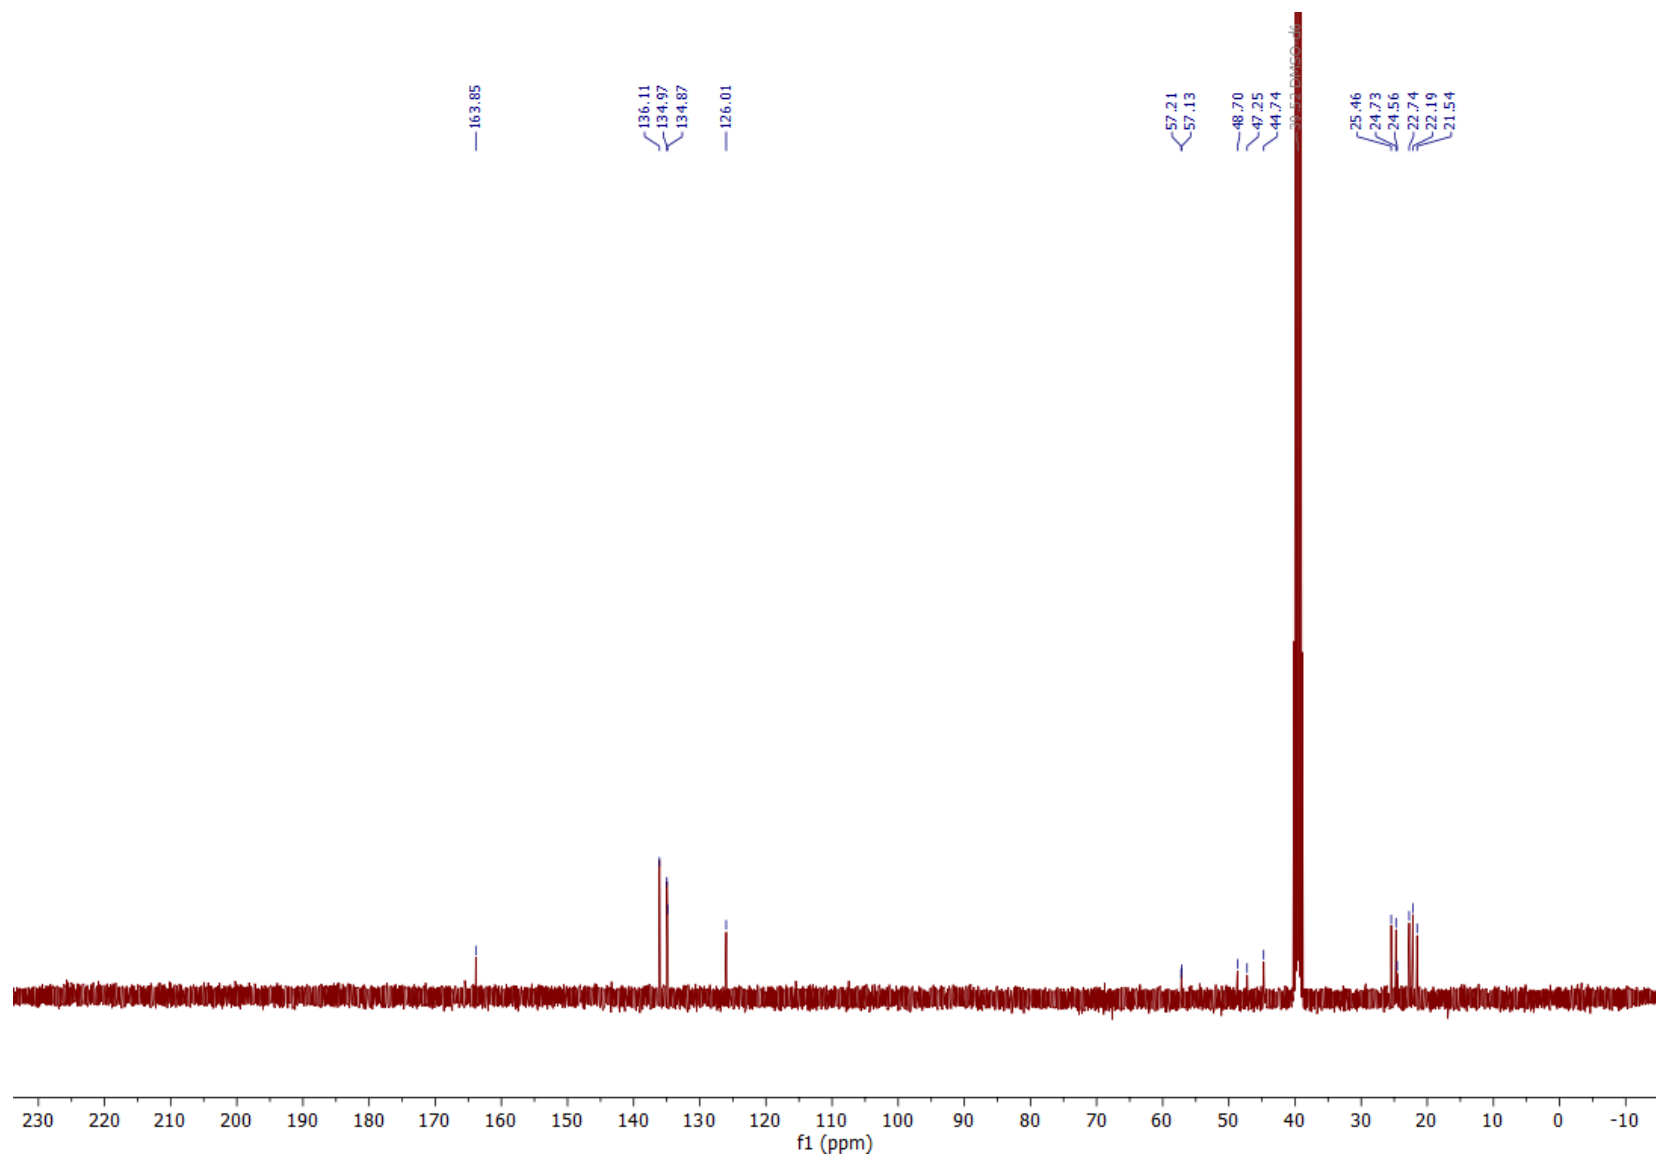

**Figure S109.** <sup>13</sup>C NMR spectrum of **5e** diastereomer 1.

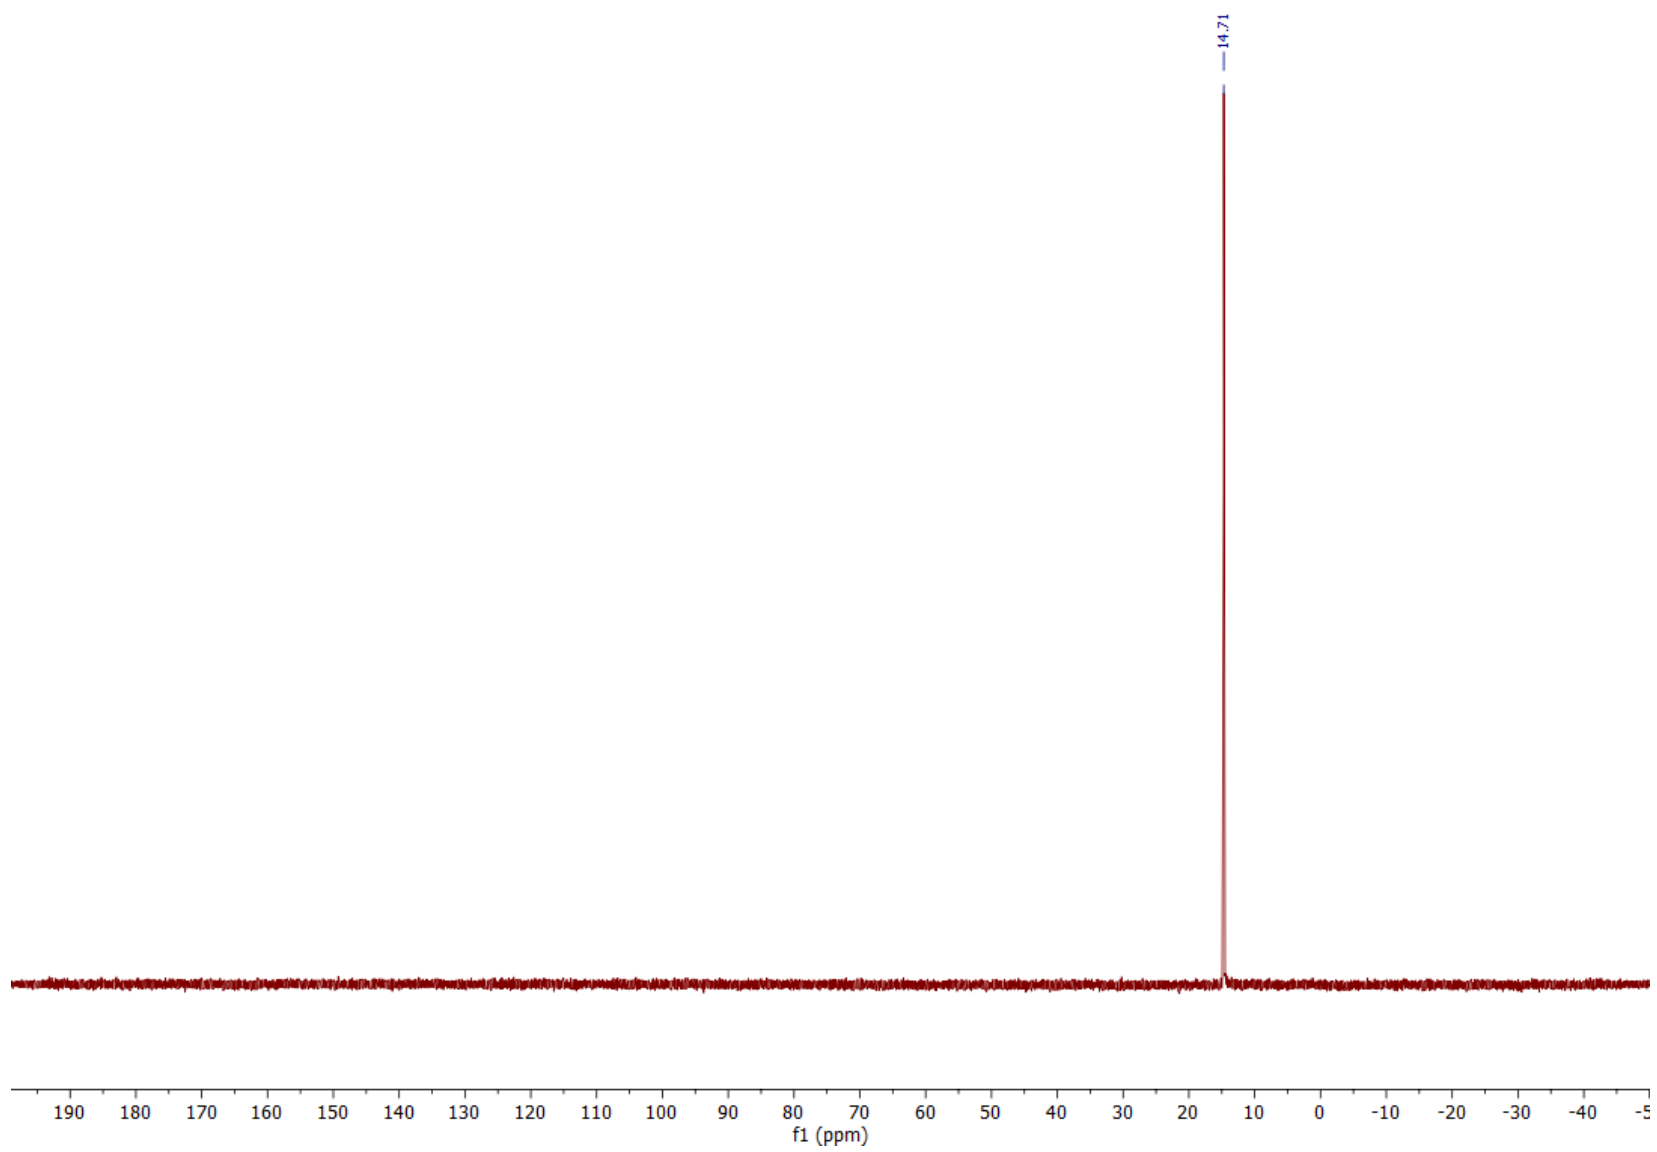

**Figure S110.**  $^{31}\text{P}$  NMR spectrum of **5e** diastereomer 1.

(Piperidin-2-yl(4,5,6,7-tetrahydrobenzo[*c*]thiophene-1-carboxamido)methyl)phosphonic acid hydrochloride (**5f**)

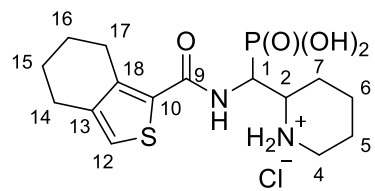



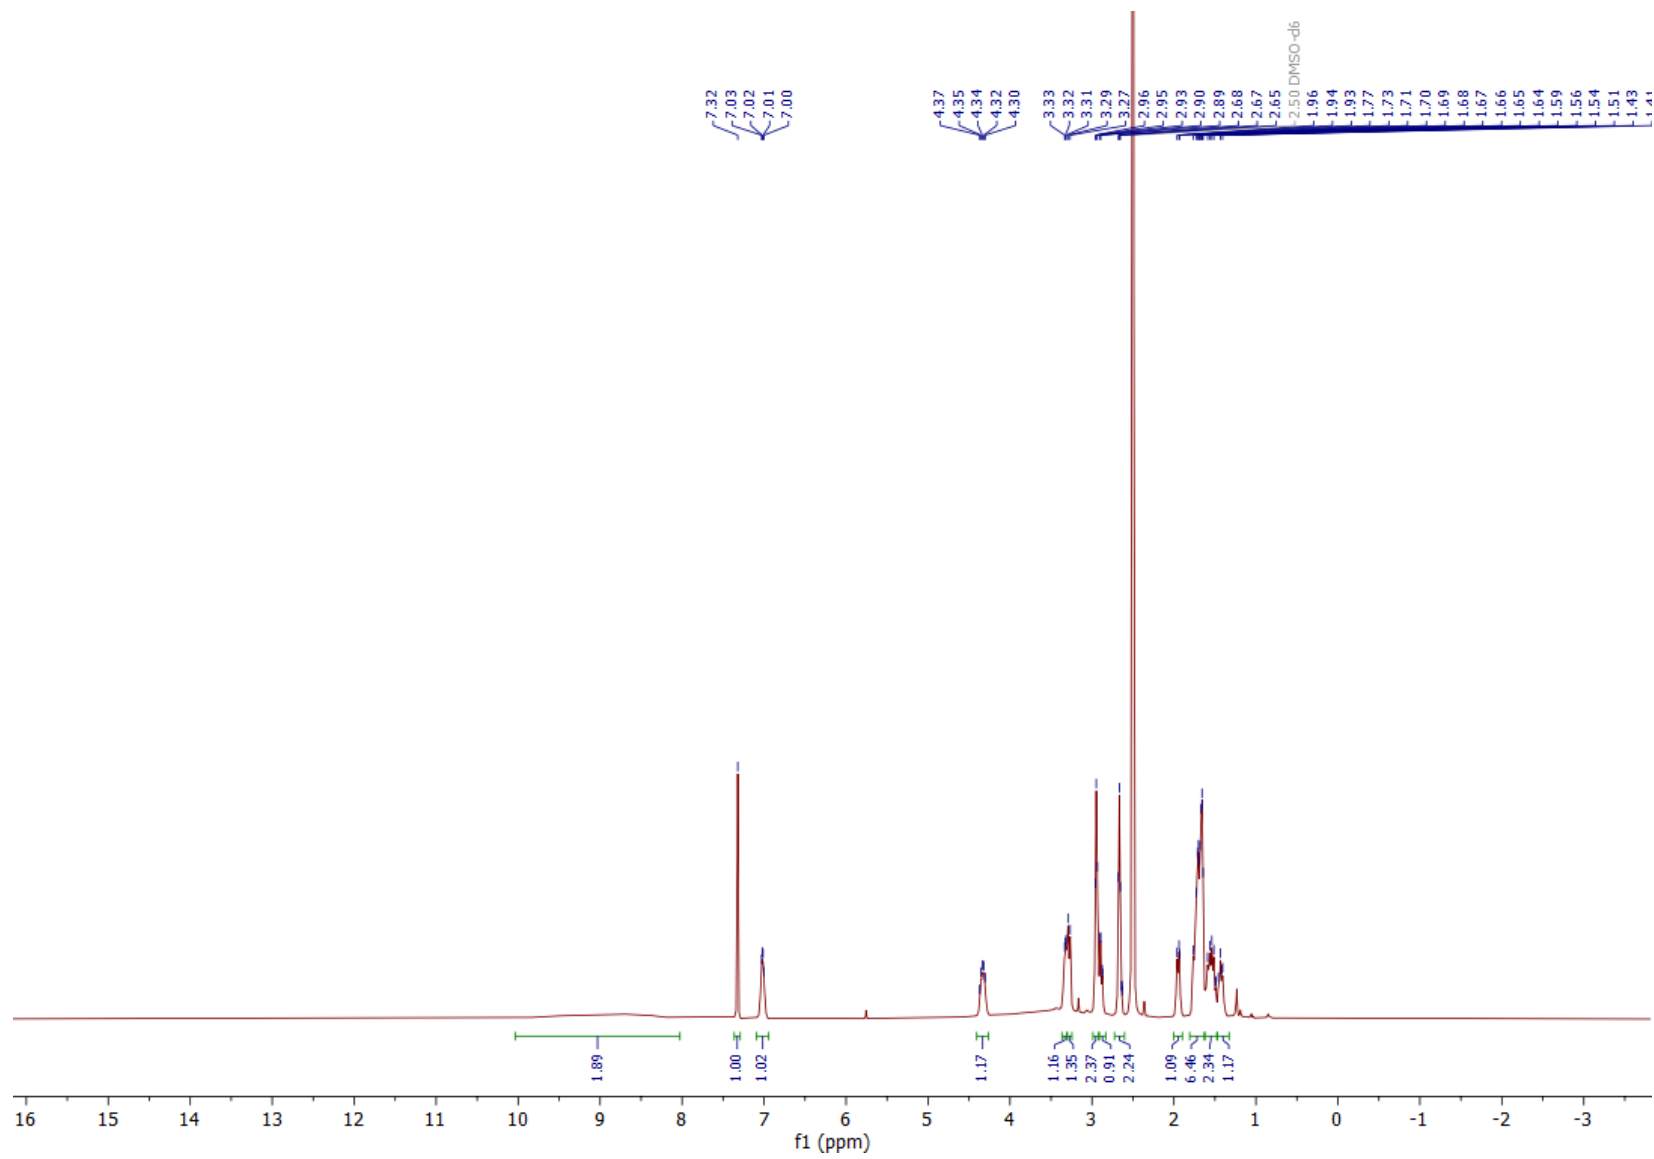

**Figure S111.**  $^1\text{H}$  NMR spectrum of **5f** diastereomer 1.

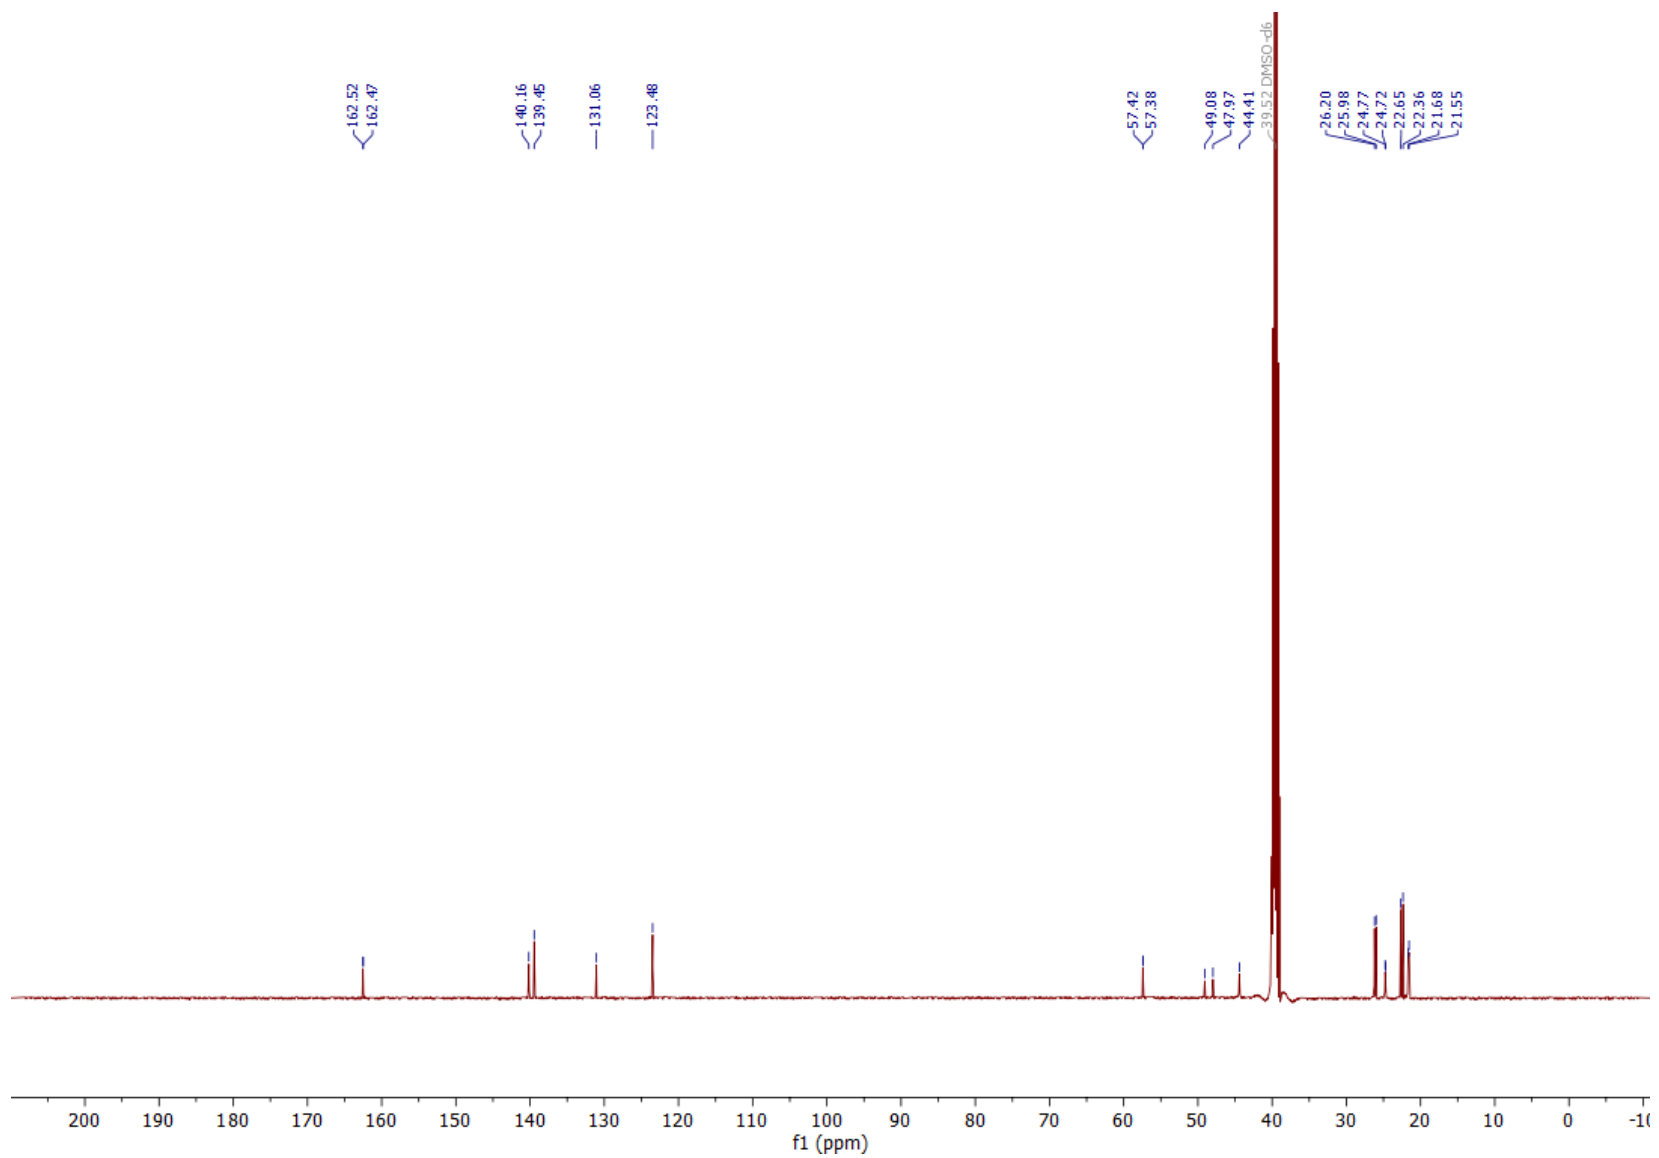

**Figure S112.** <sup>13</sup>C NMR spectrum of **5f** diastereomer 1.

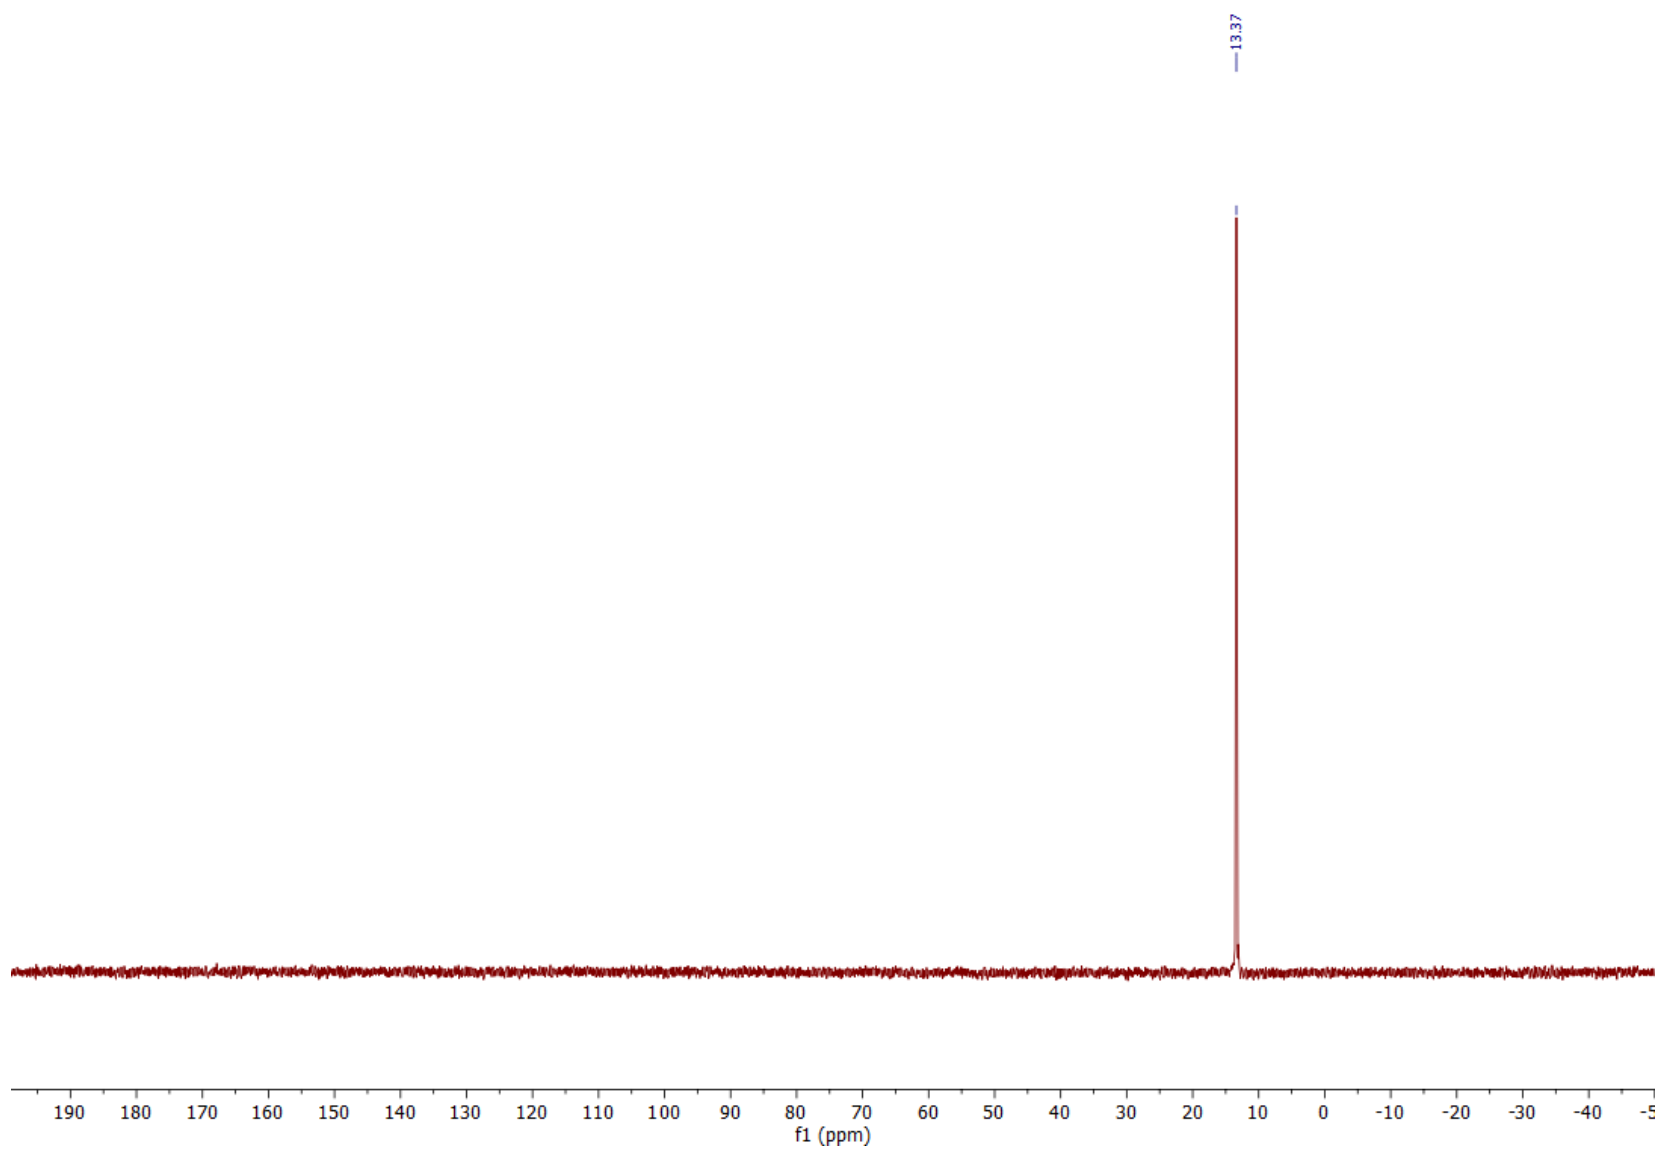

**Figure S113.**  $^{31}\text{P}$  NMR spectrum of **5f** diastereomer 1.

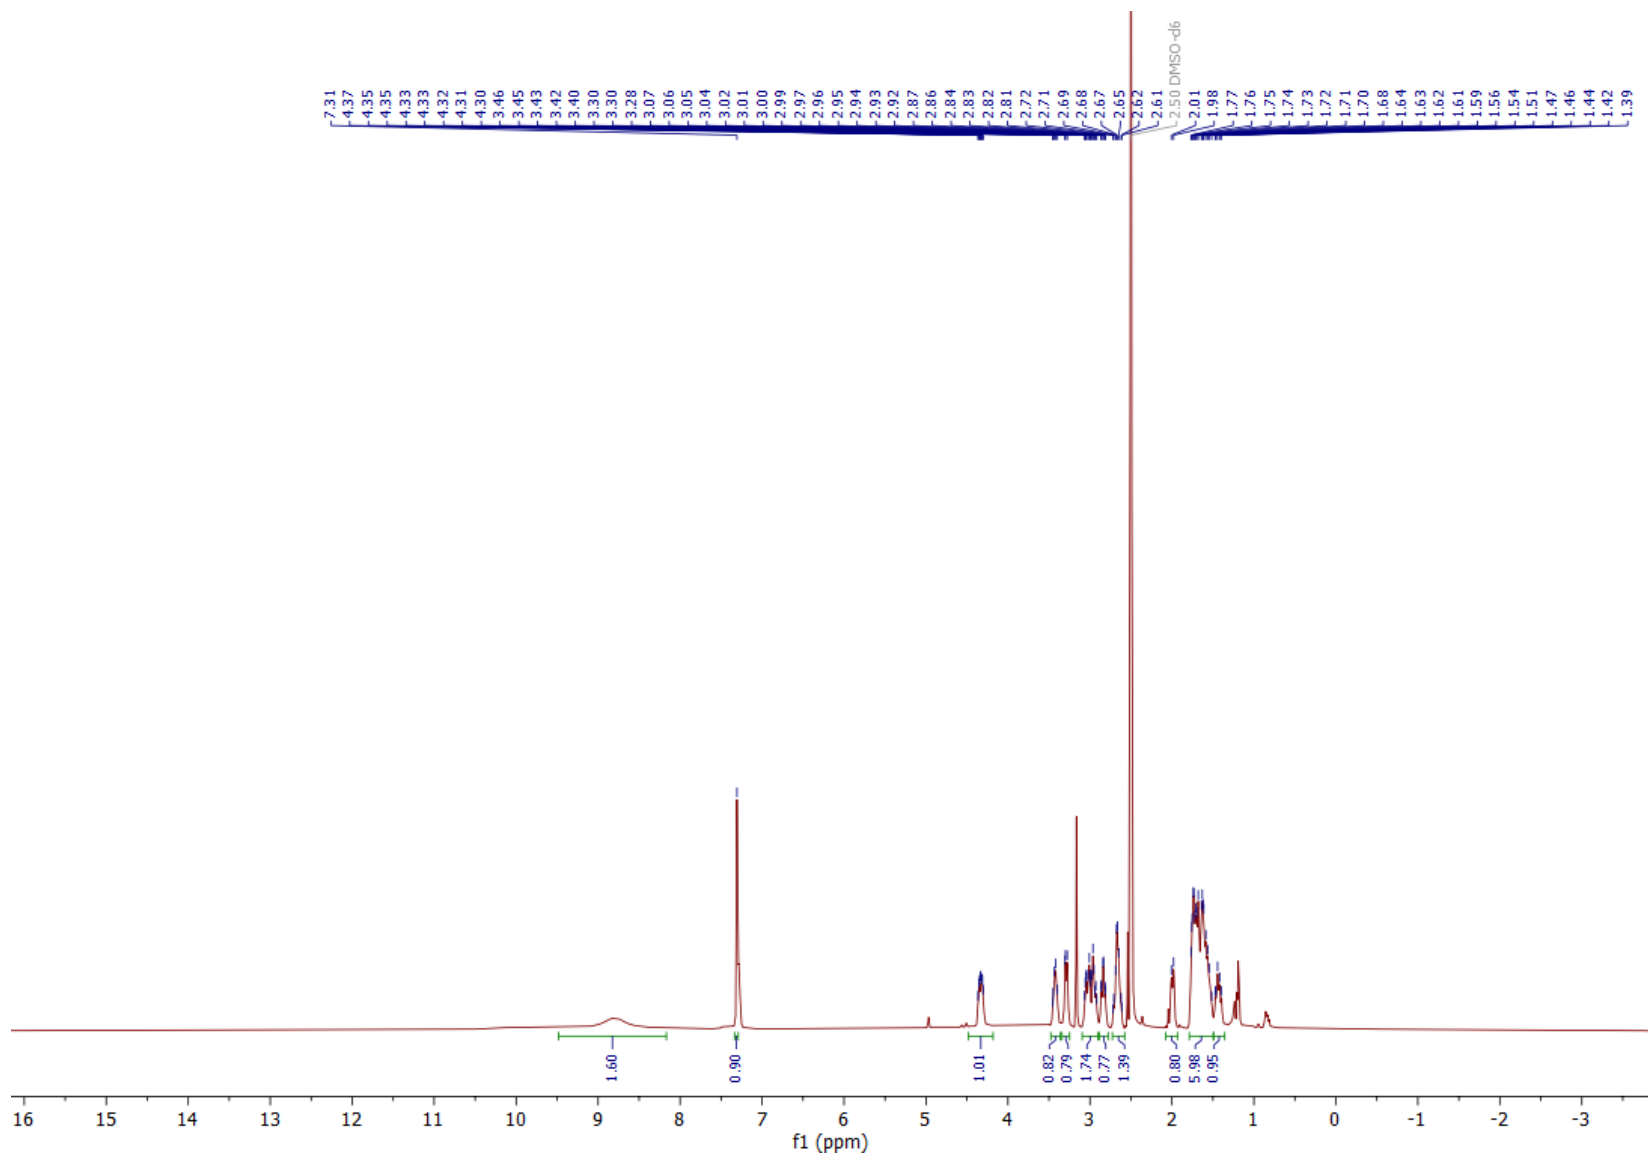

**Figure S114.**  $^1\text{H}$  NMR spectrum of **5f** diastereomer 2.

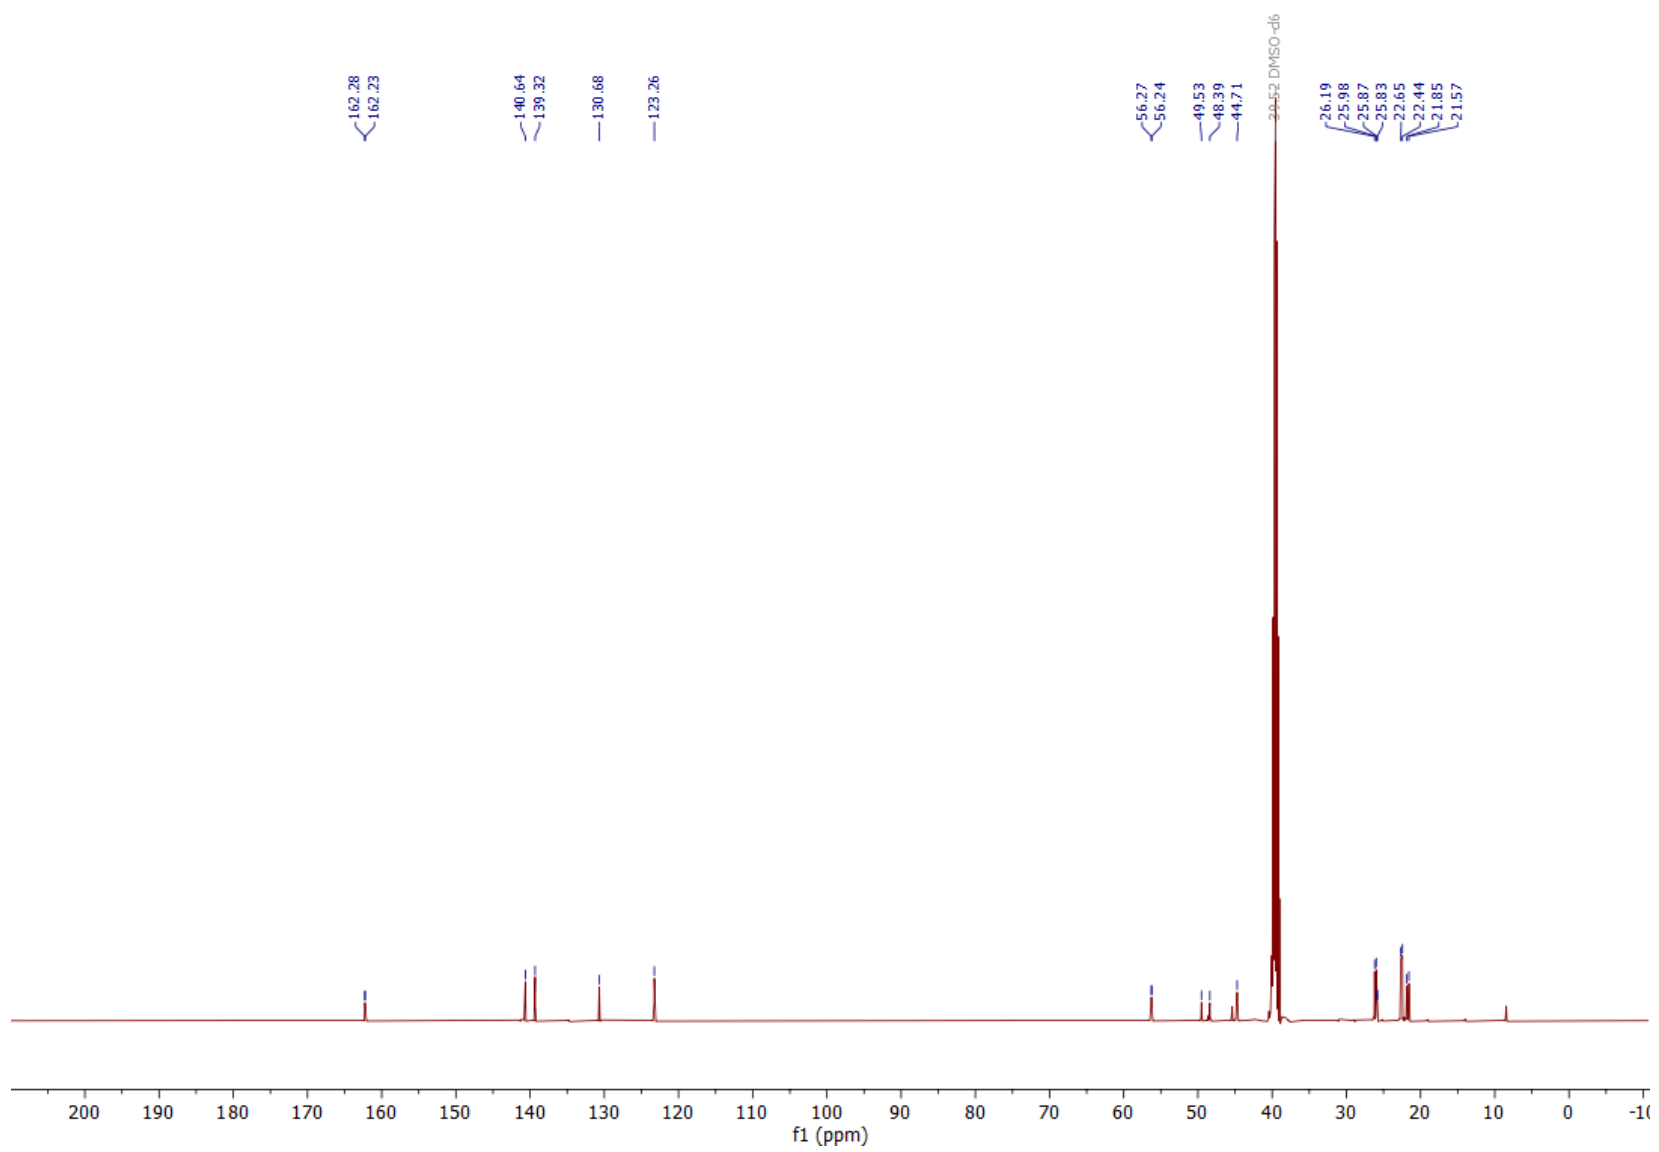

**Figure S115.** <sup>13</sup>C NMR spectrum of **5f** diastereomer 2.

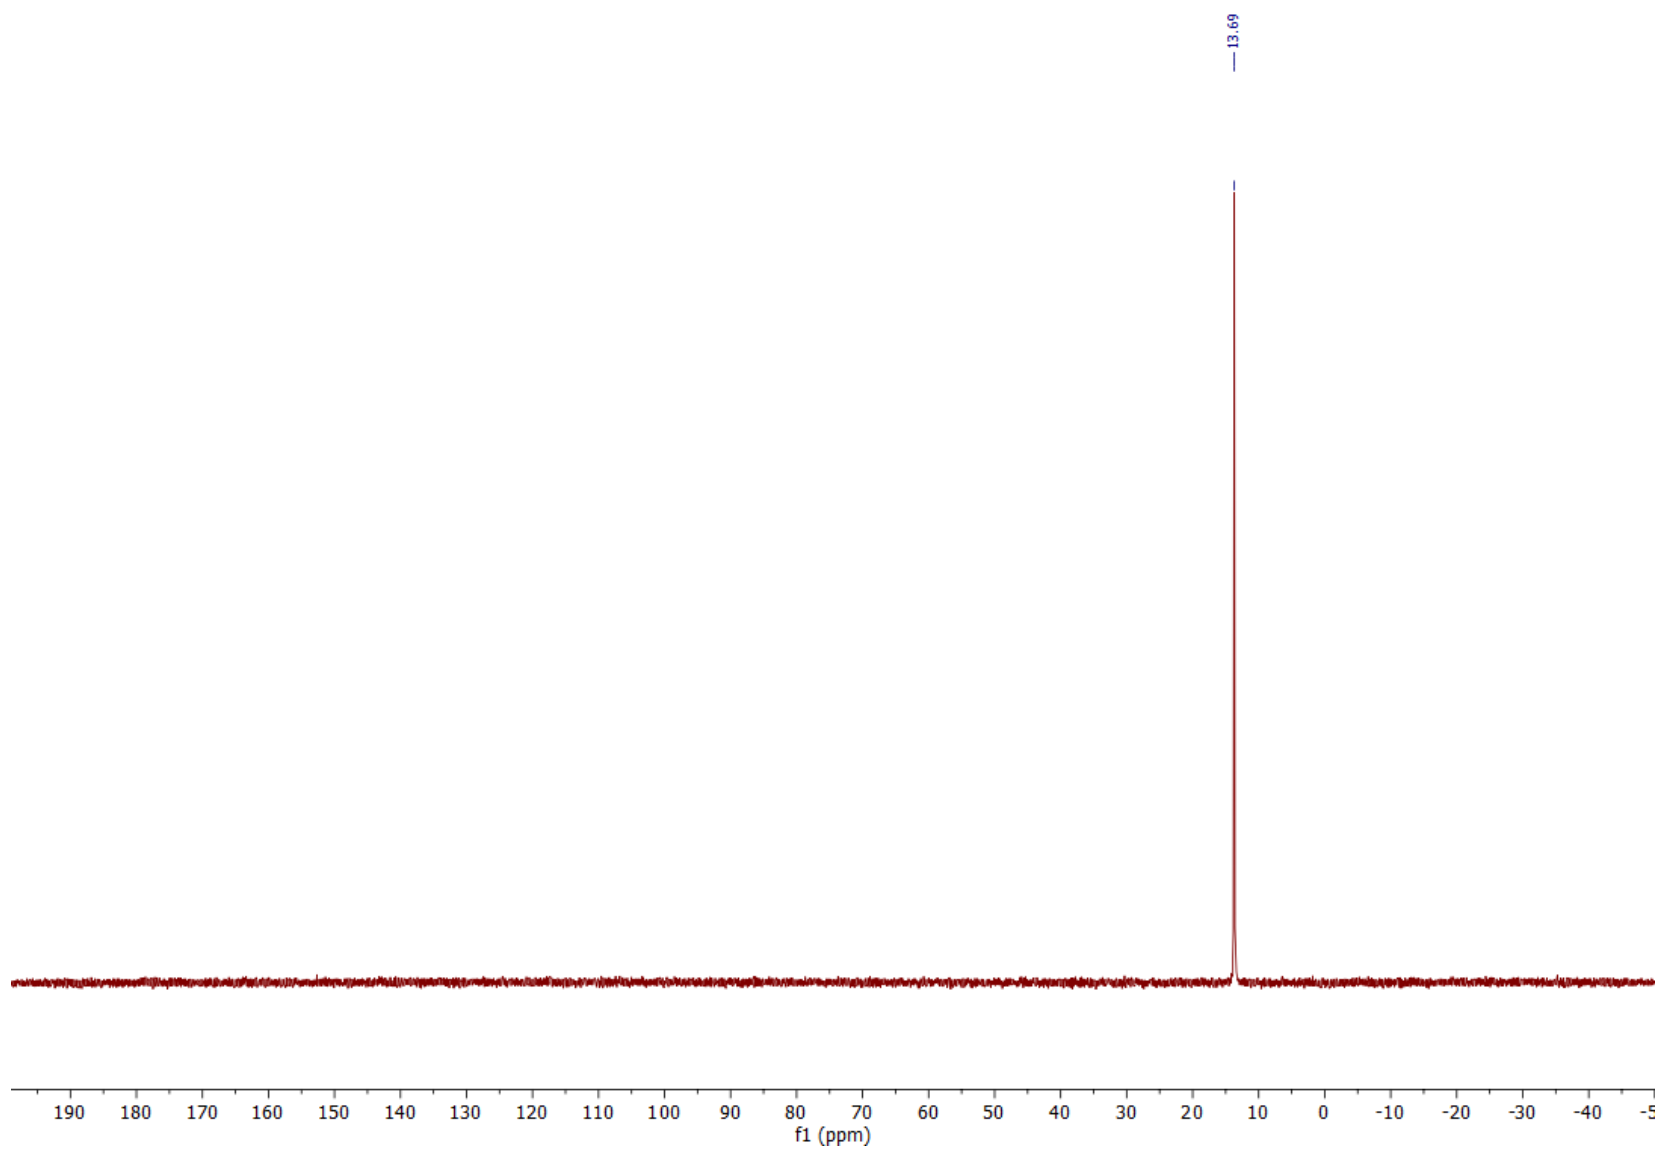

**Figure S116.**  $^{31}\text{P}$  NMR spectrum of **5f** diastereomer 2.

((Benzo[*b*]thiophene-2-carboxamido)(piperidin-2-yl)methyl)phosphonic acid hydrochloride (**5g**)

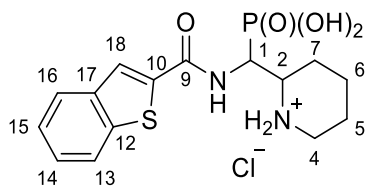

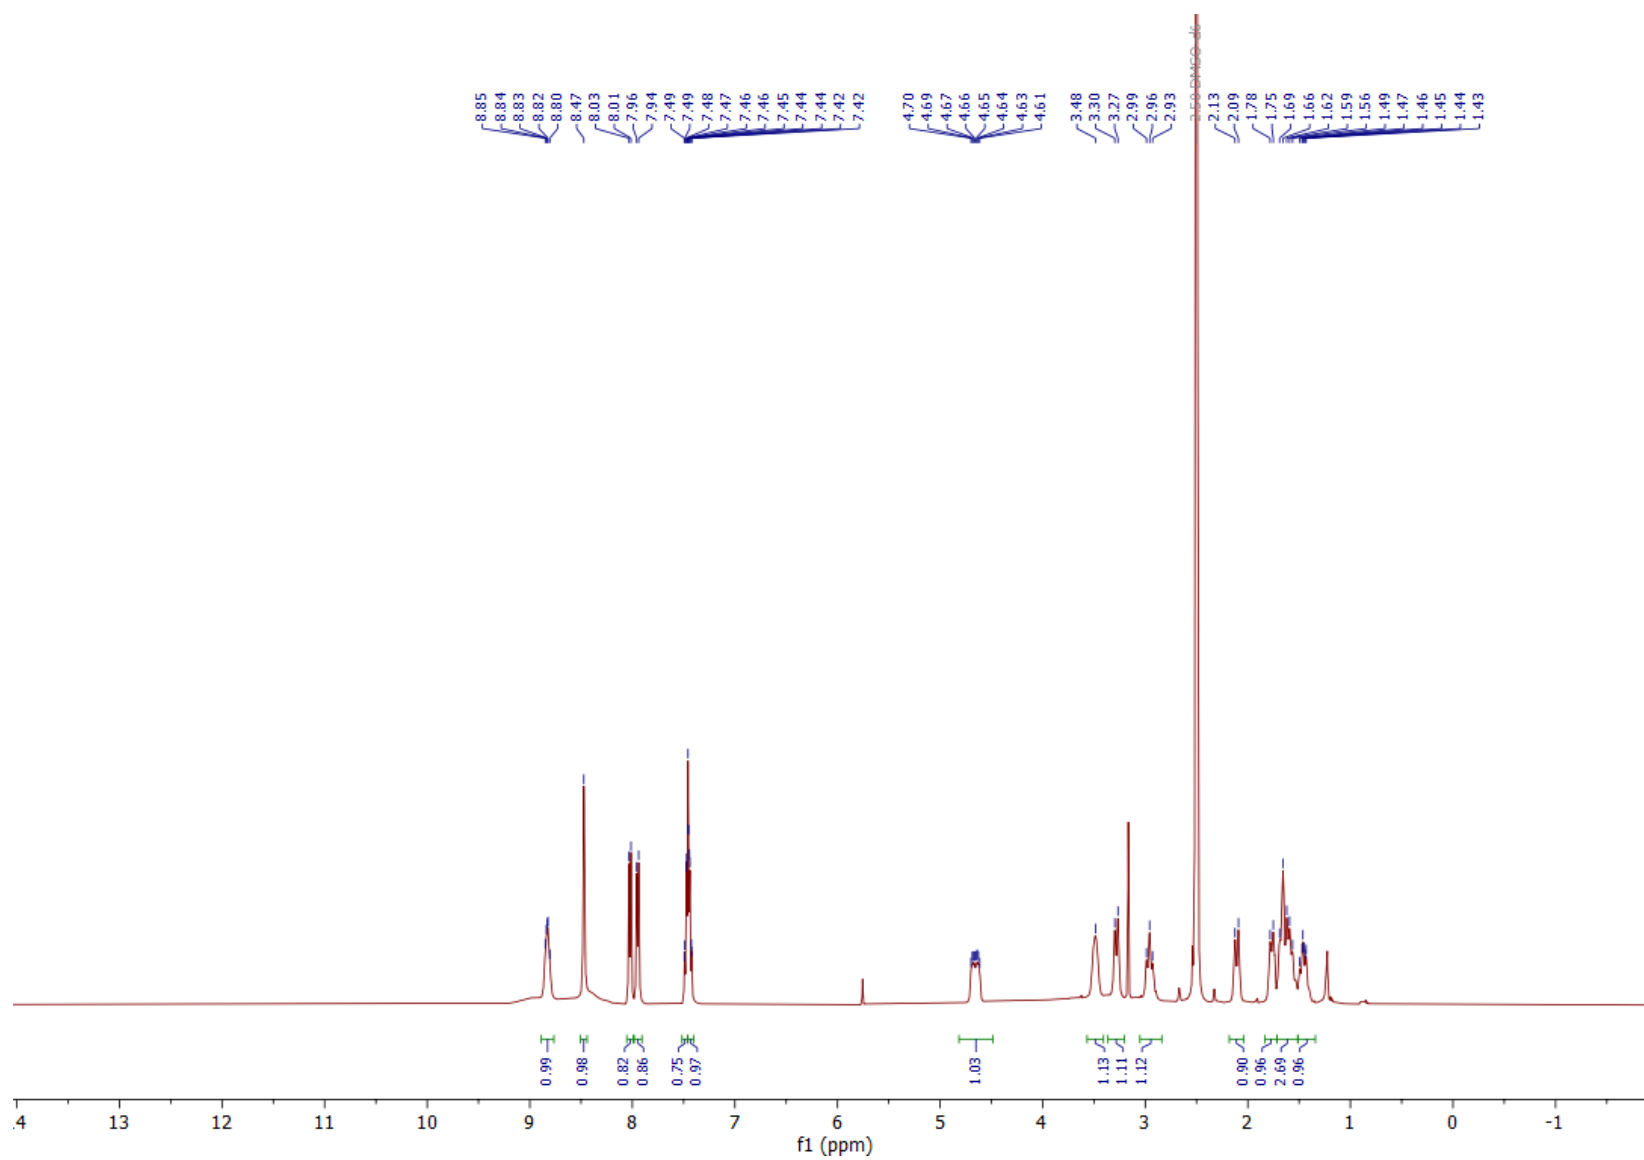

Figure S117. <sup>1</sup>H NMR spectrum of **5g** diastereomer 1.



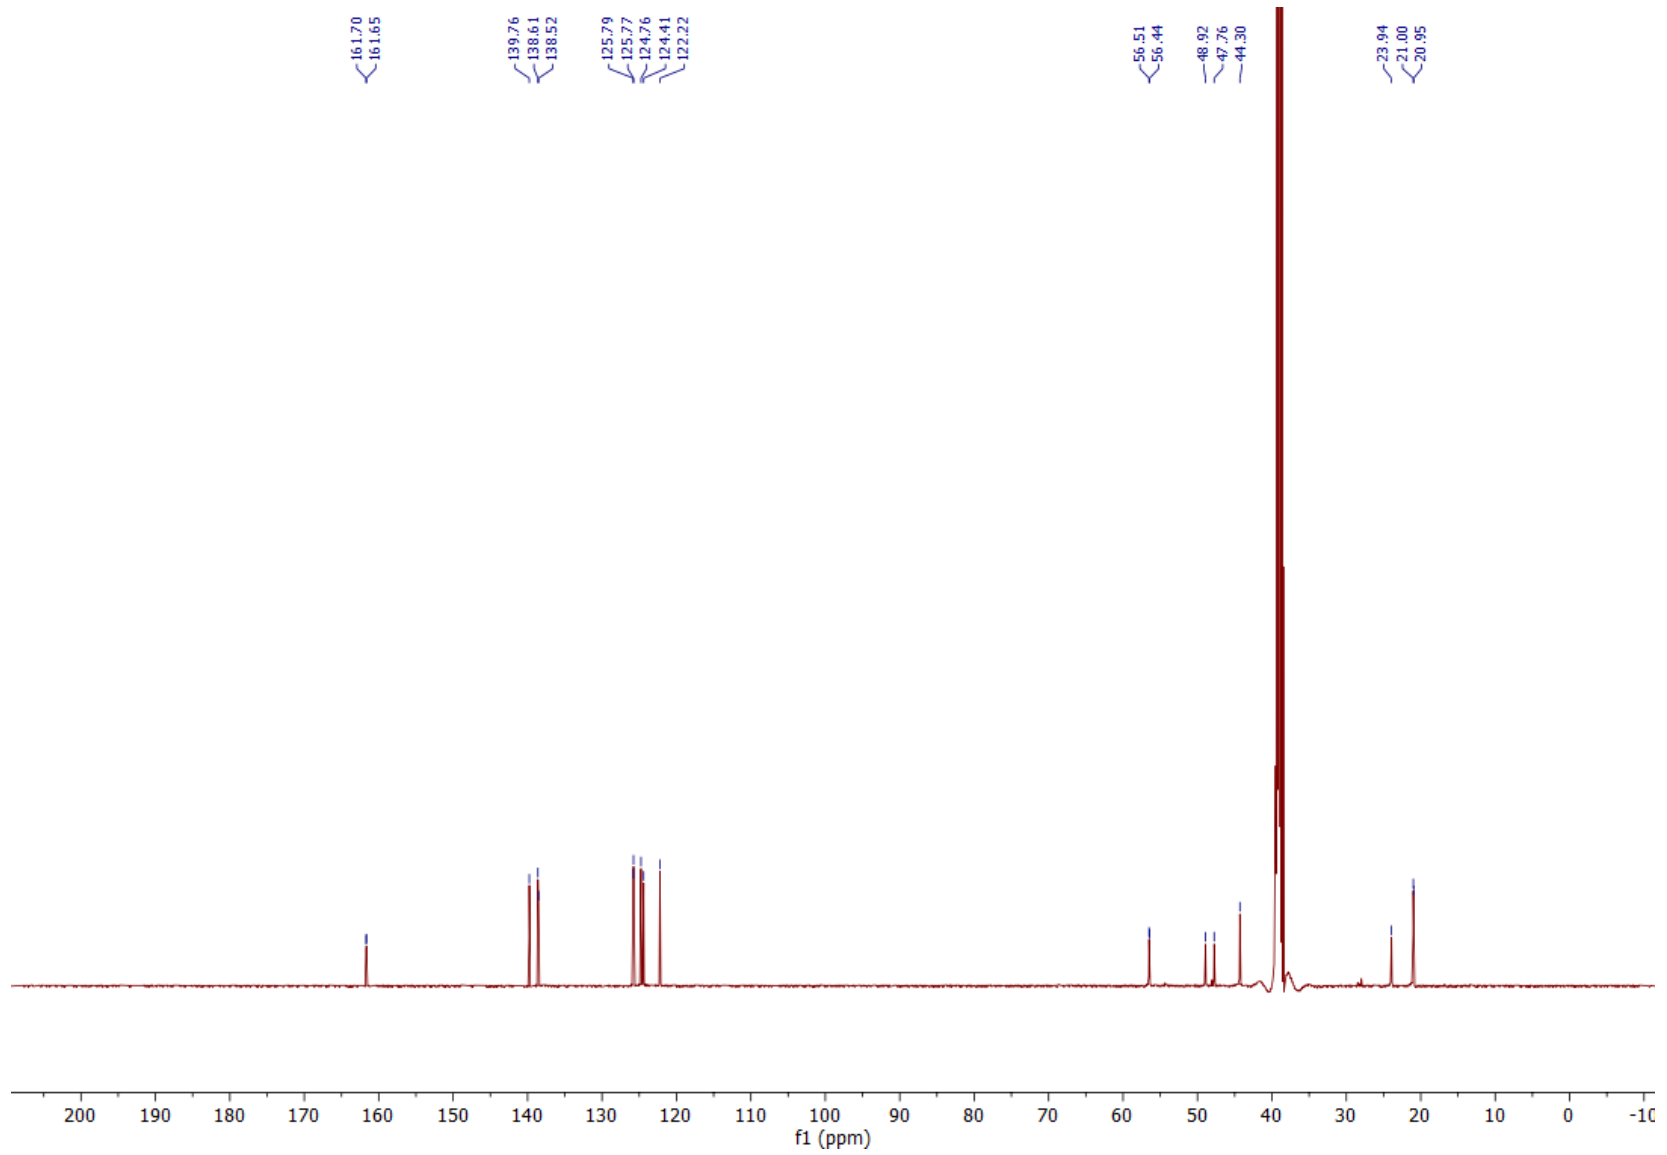

**Figure S118.**  $^{13}\text{C}$  NMR spectrum of **5g** diastereomer **1**.

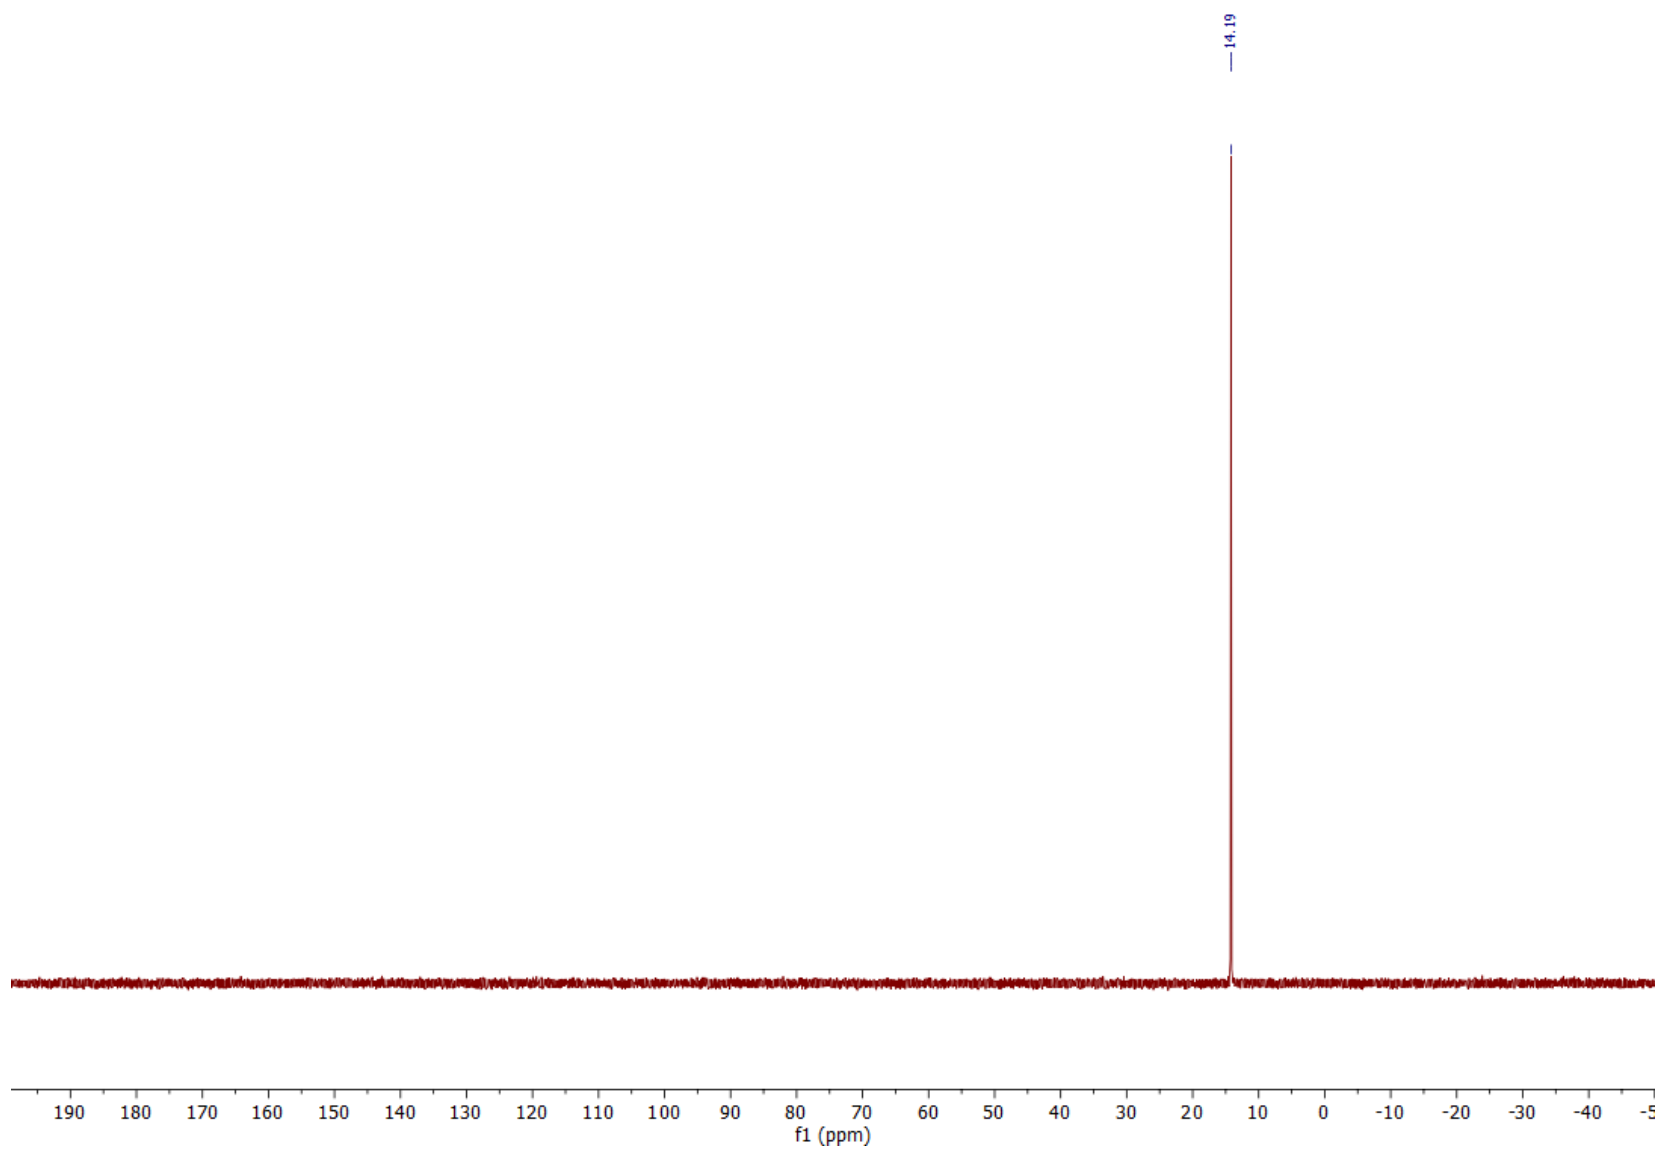

**Figure S119.**  $^{31}\text{P}$  NMR spectrum of **5g** diastereomer **1**.

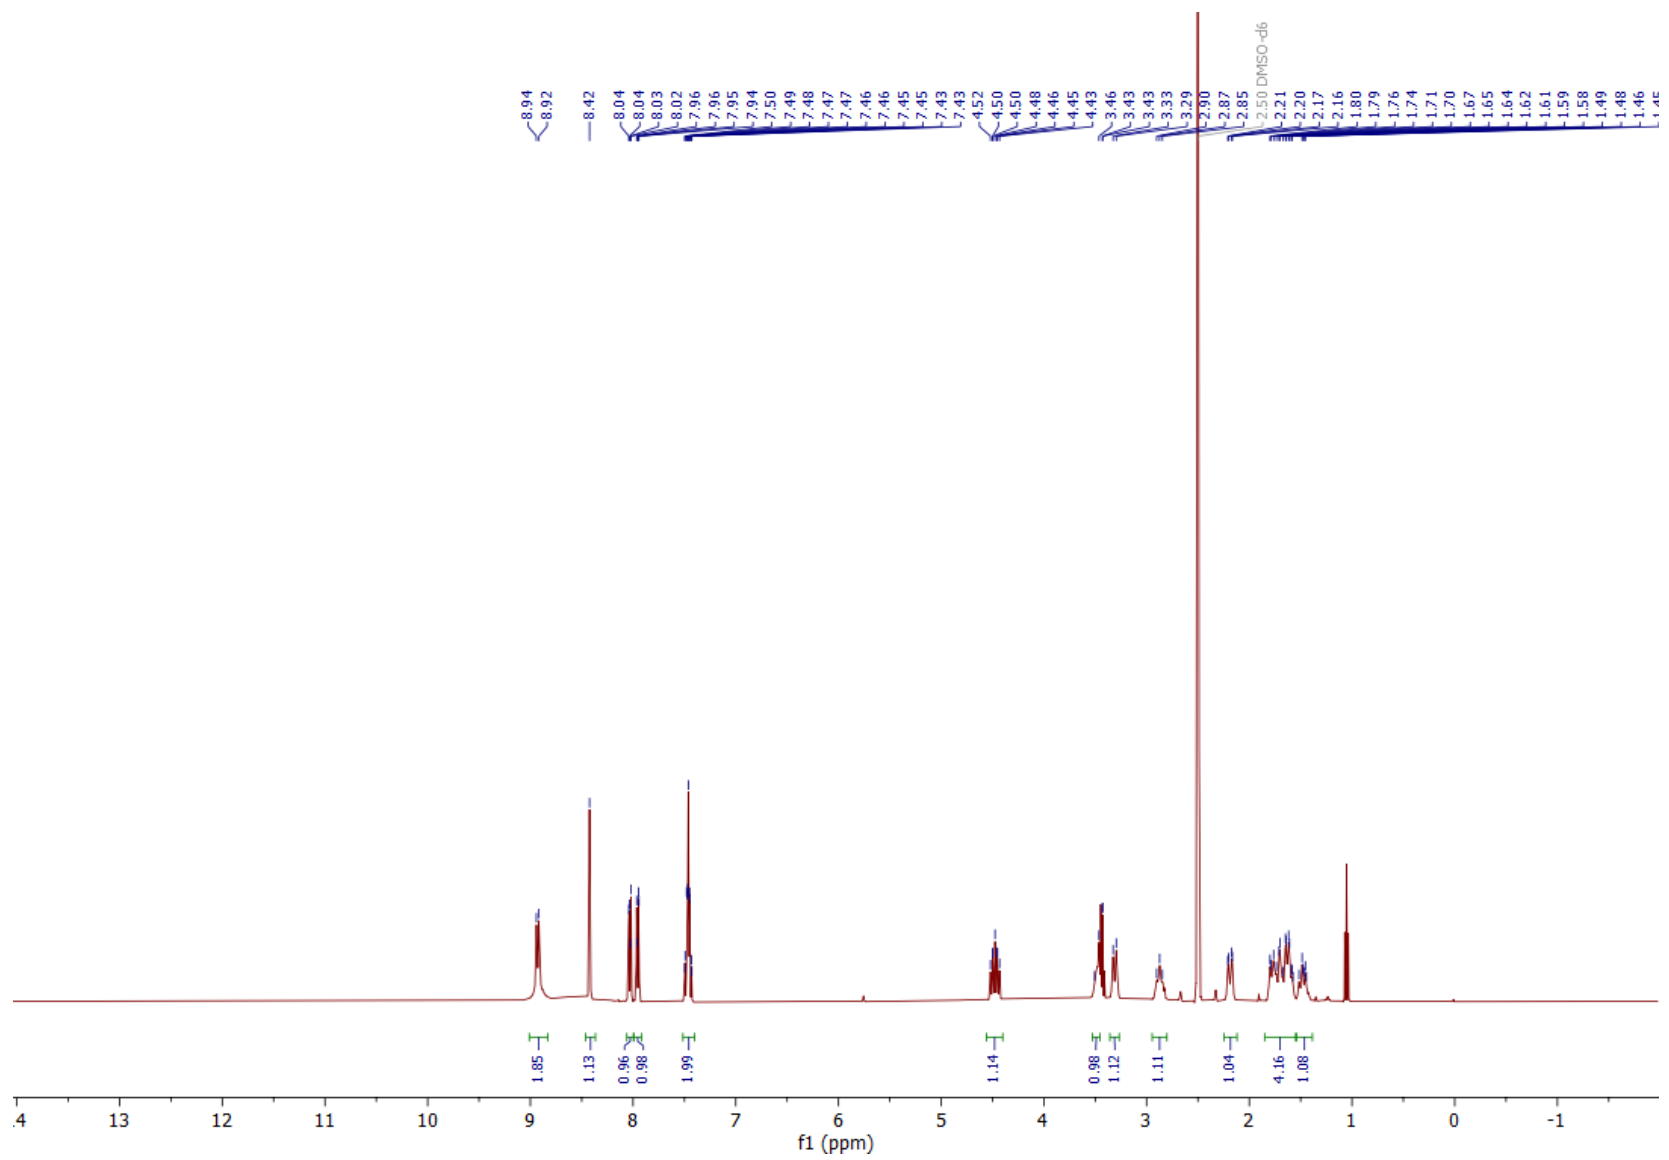

**Figure S120.**  $^1\text{H}$  NMR spectrum of **5g** diastereomer 2.

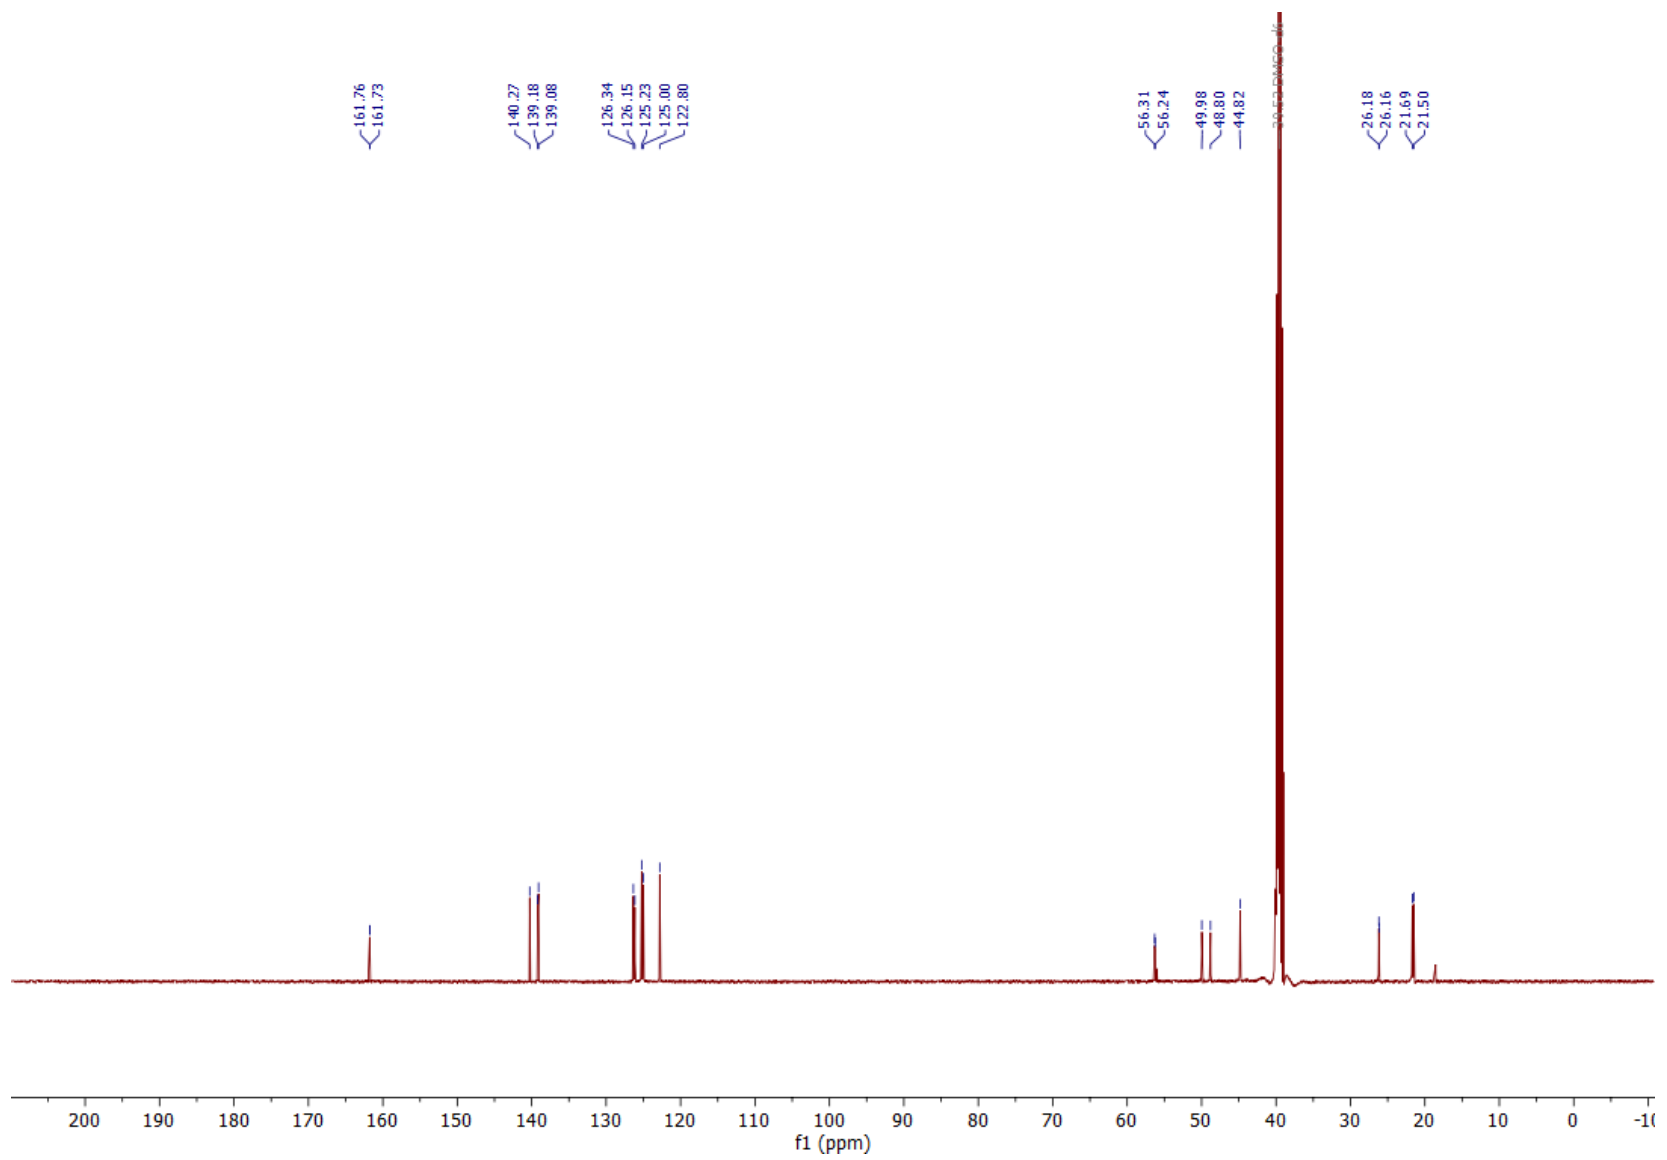

**Figure S121.** <sup>13</sup>C NMR spectrum of **5g** diastereomer 2.

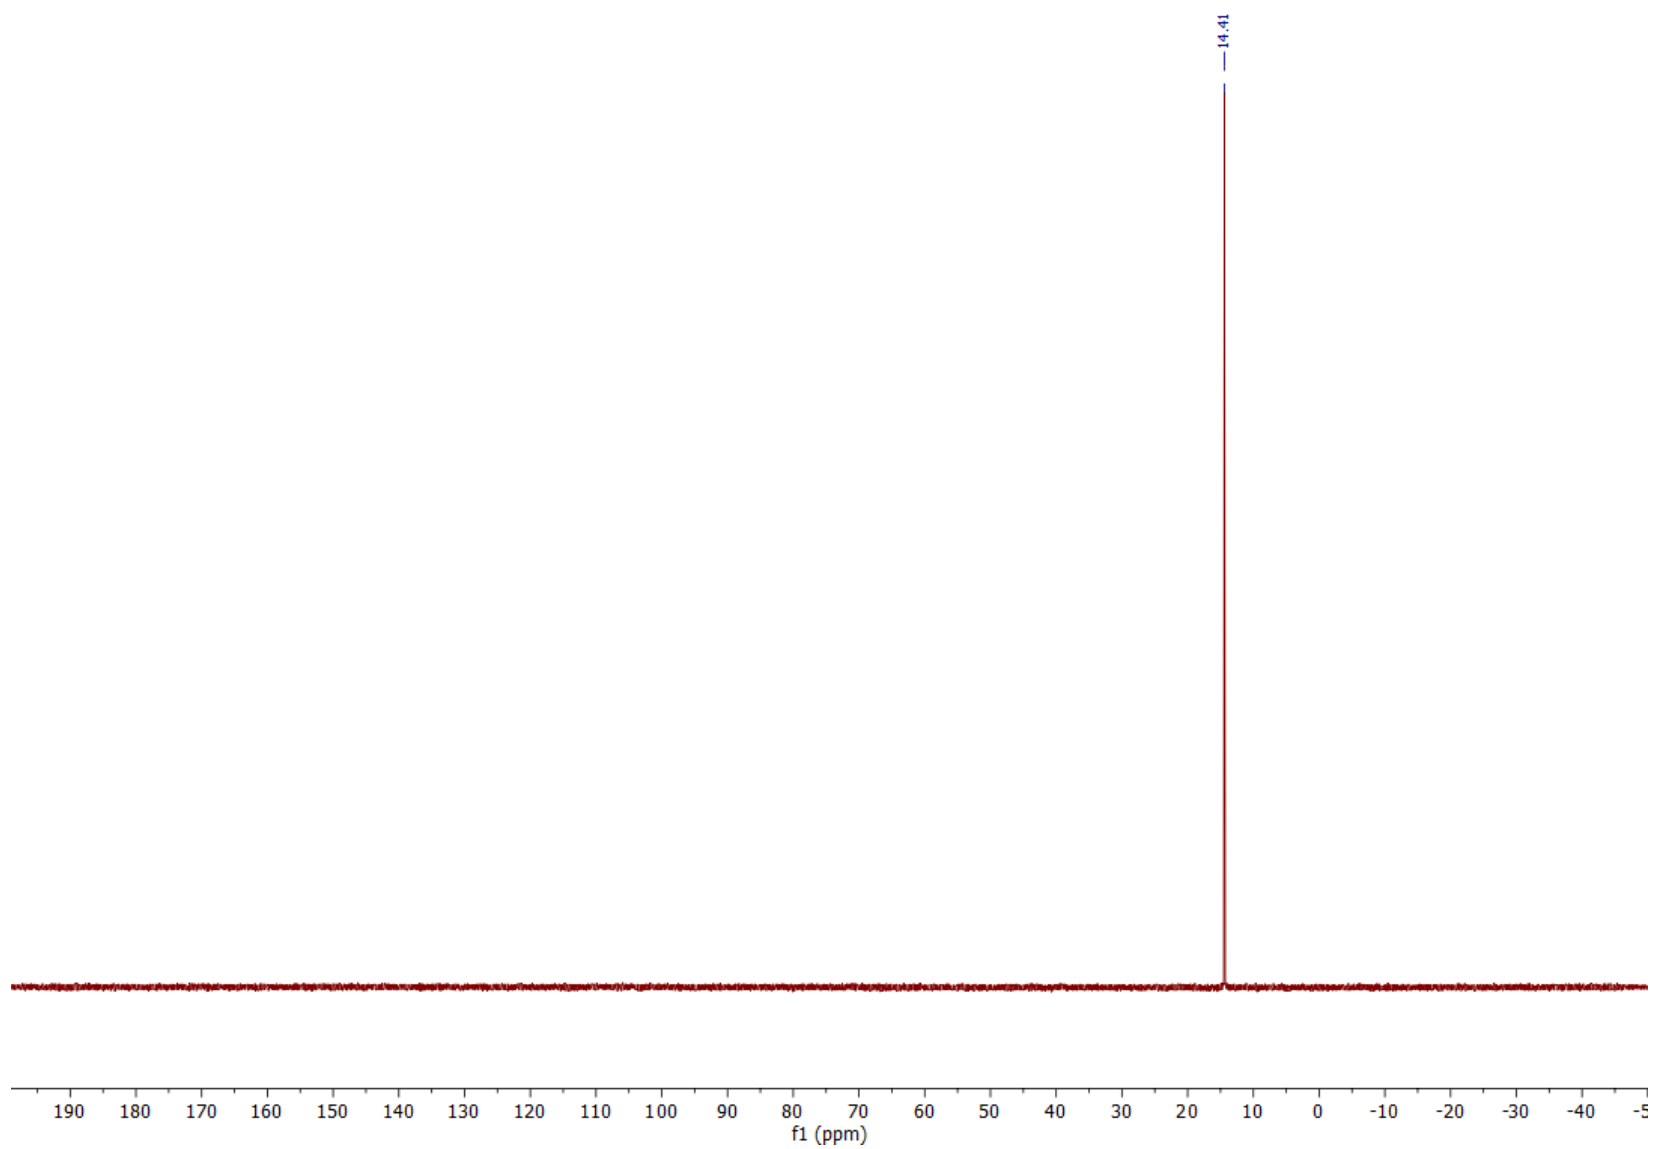

**Figure S122.**  $^{31}\text{P}$  NMR spectrum of **5g** diastereomer **2**.

((Benzo[*b*]thiophene-3-carboxamido)(piperidin-2-yl)methyl)phosphonic acid hydrochloride (**5h**)

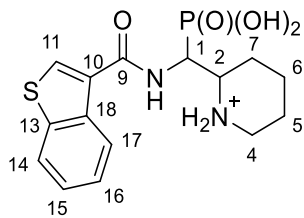

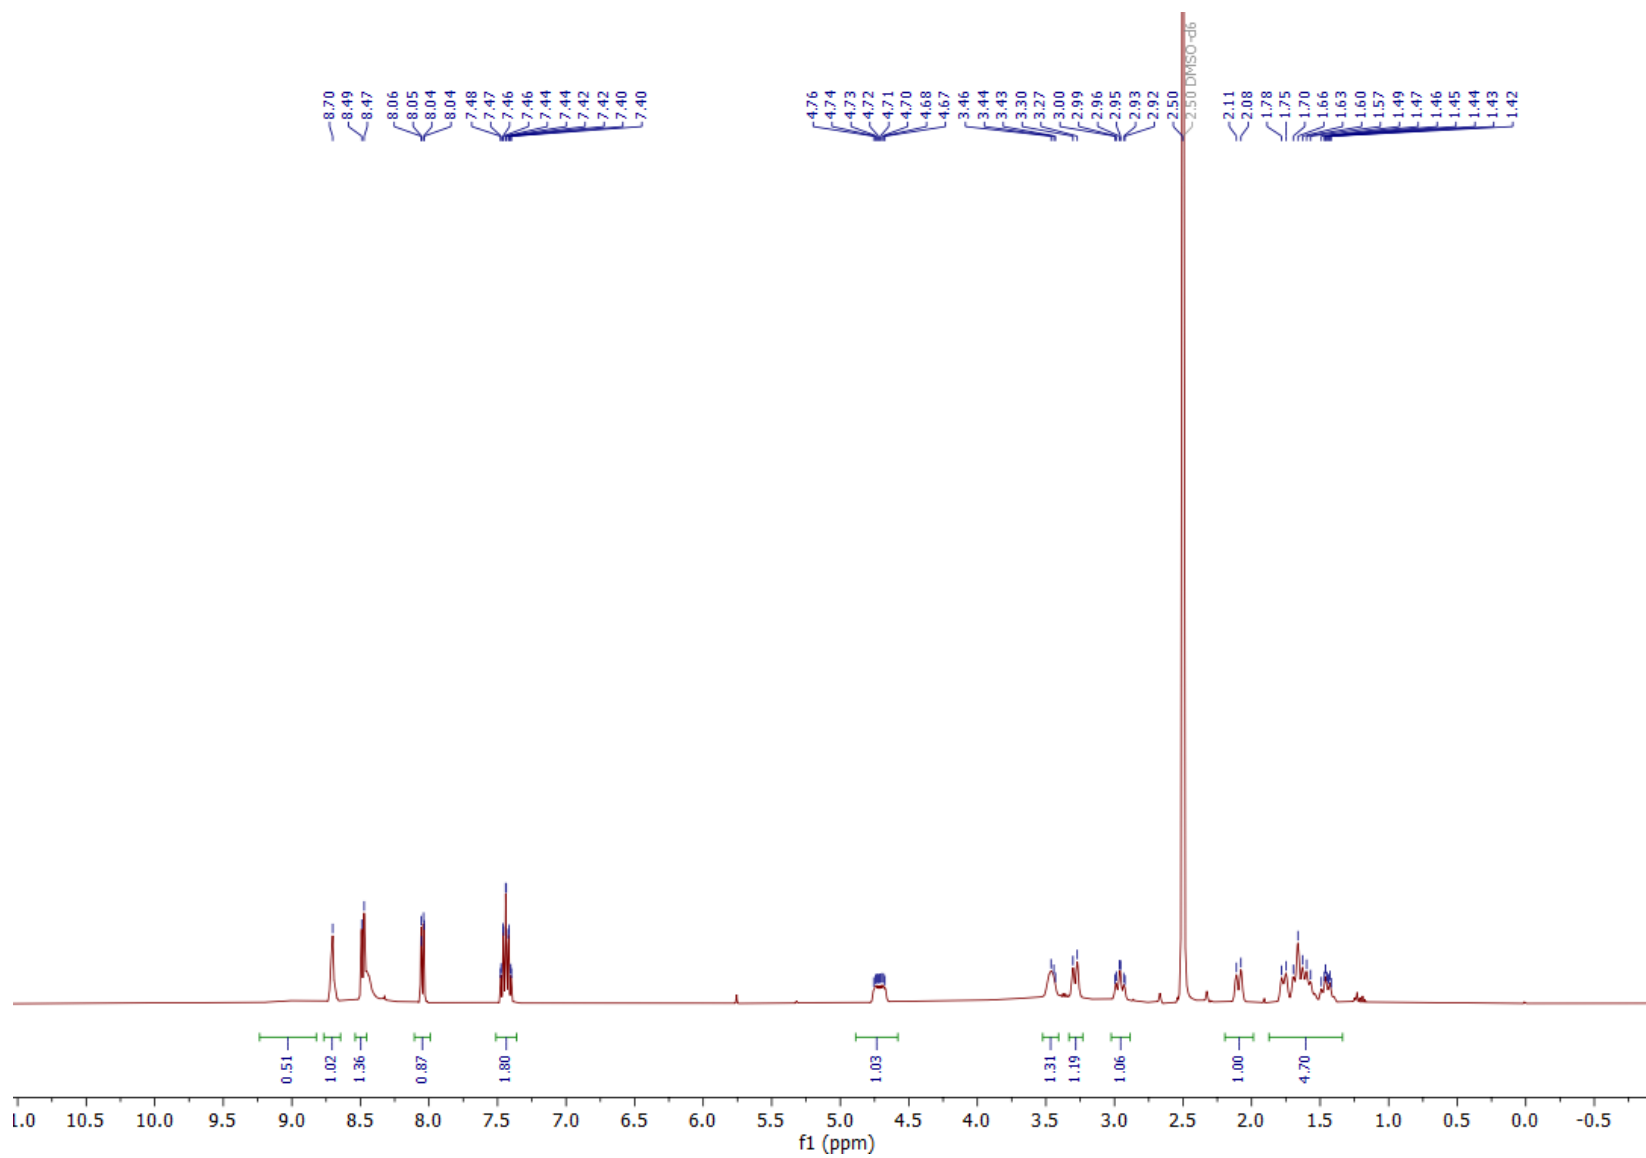

**Figure S123.**  $^1\text{H}$  NMR spectrum of **5h** diastereomer 1.

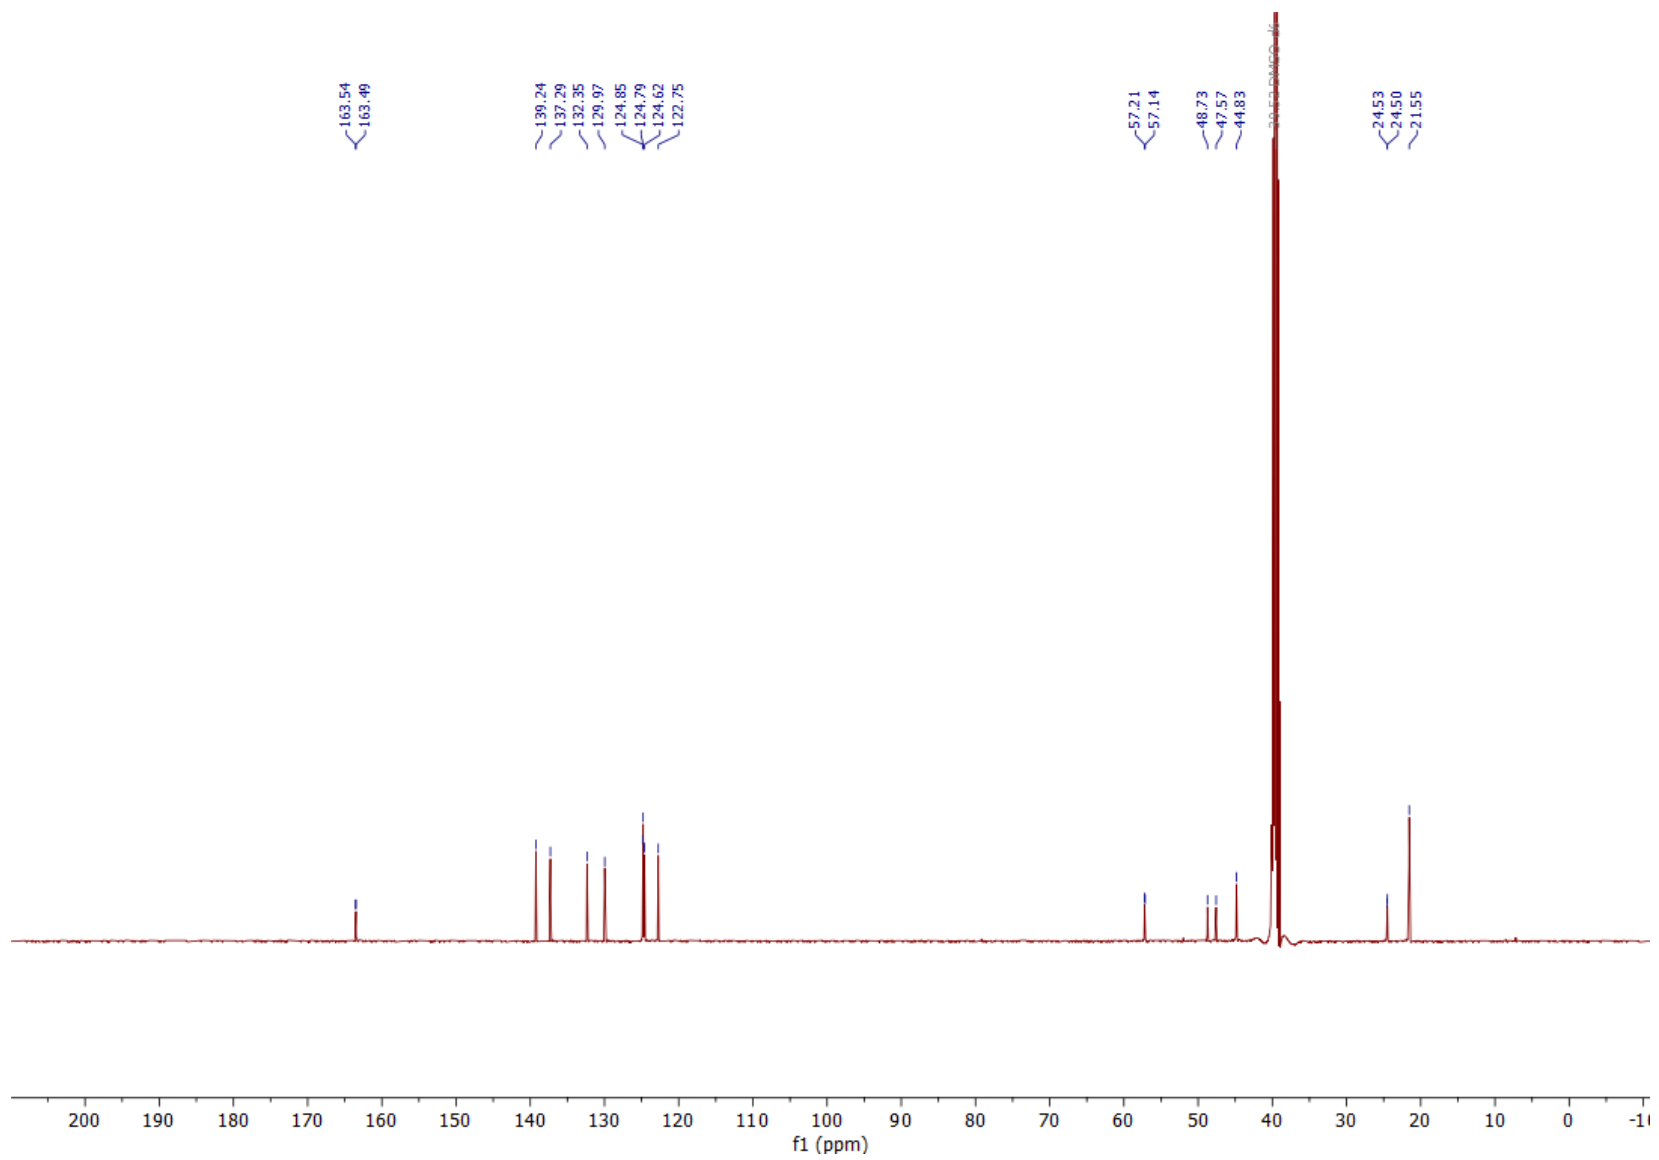

**Figure S124.** <sup>13</sup>C NMR spectrum of **5h** diastereomer 1.



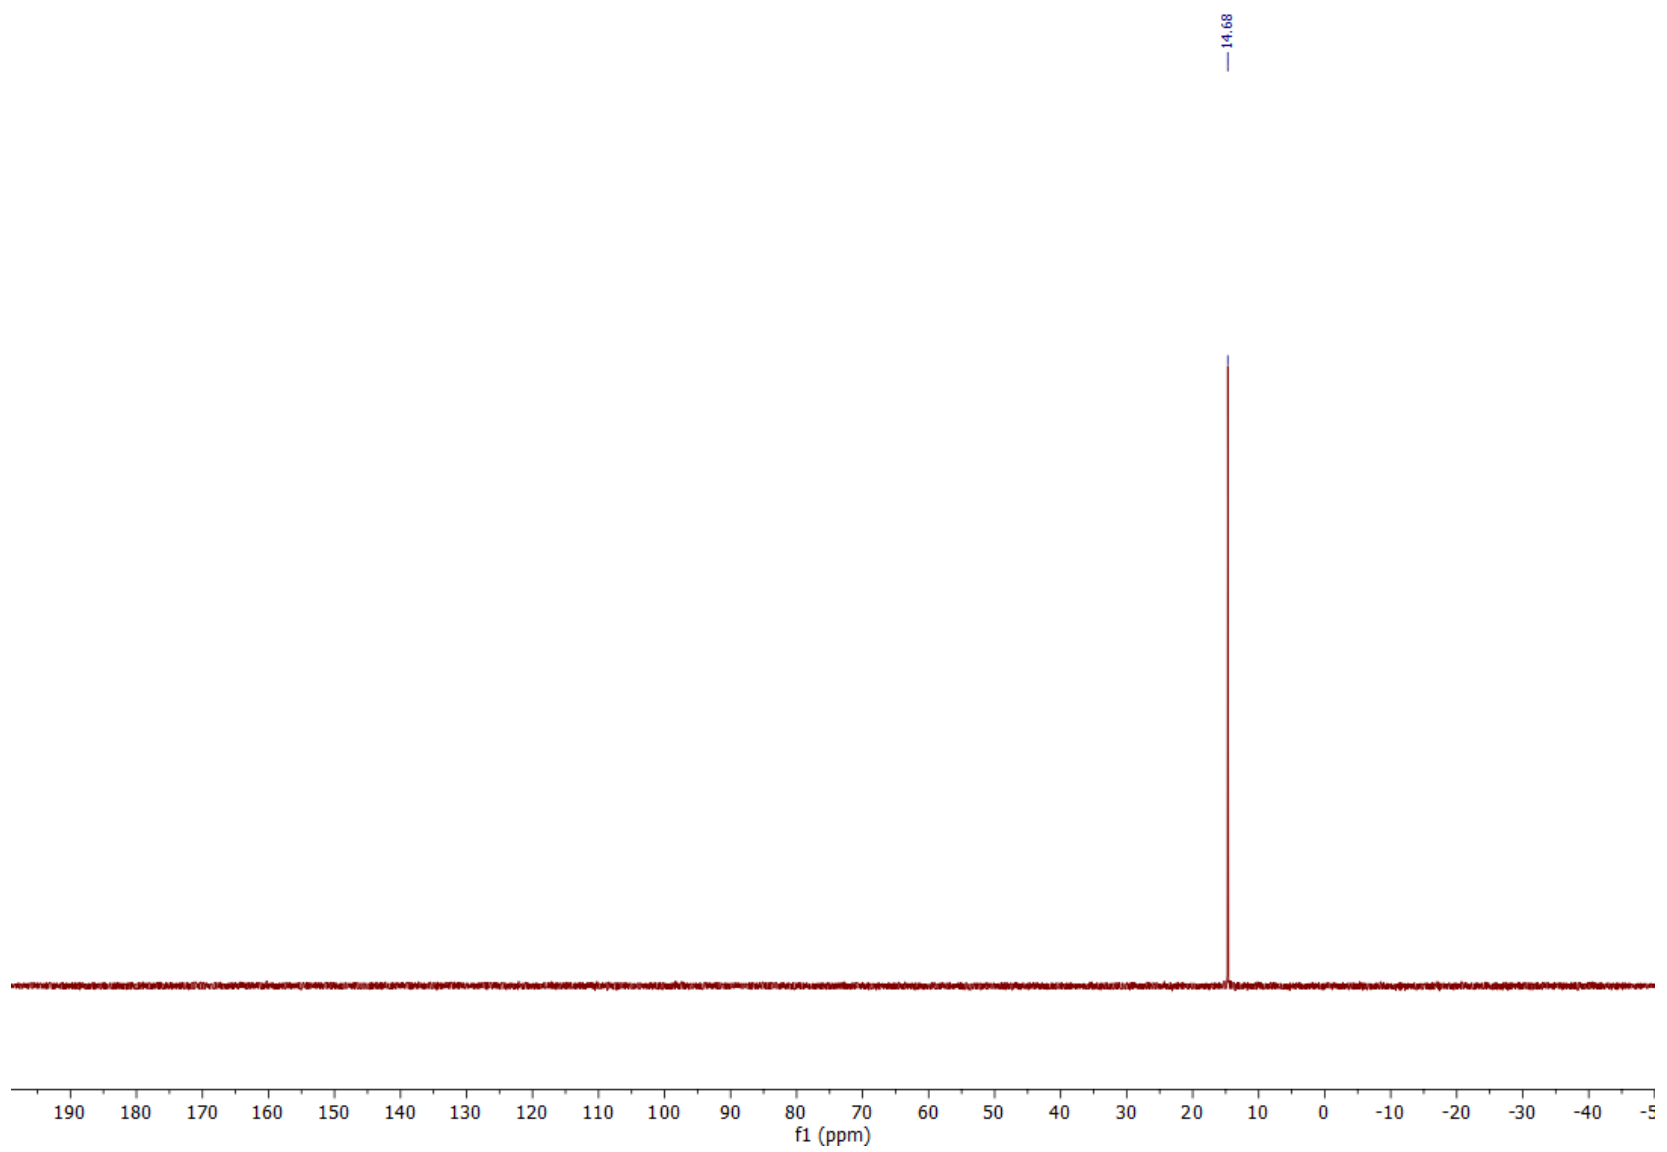

**Figure S125.**  $^{31}\text{P}$  NMR spectrum of **5h** diastereomer 1.

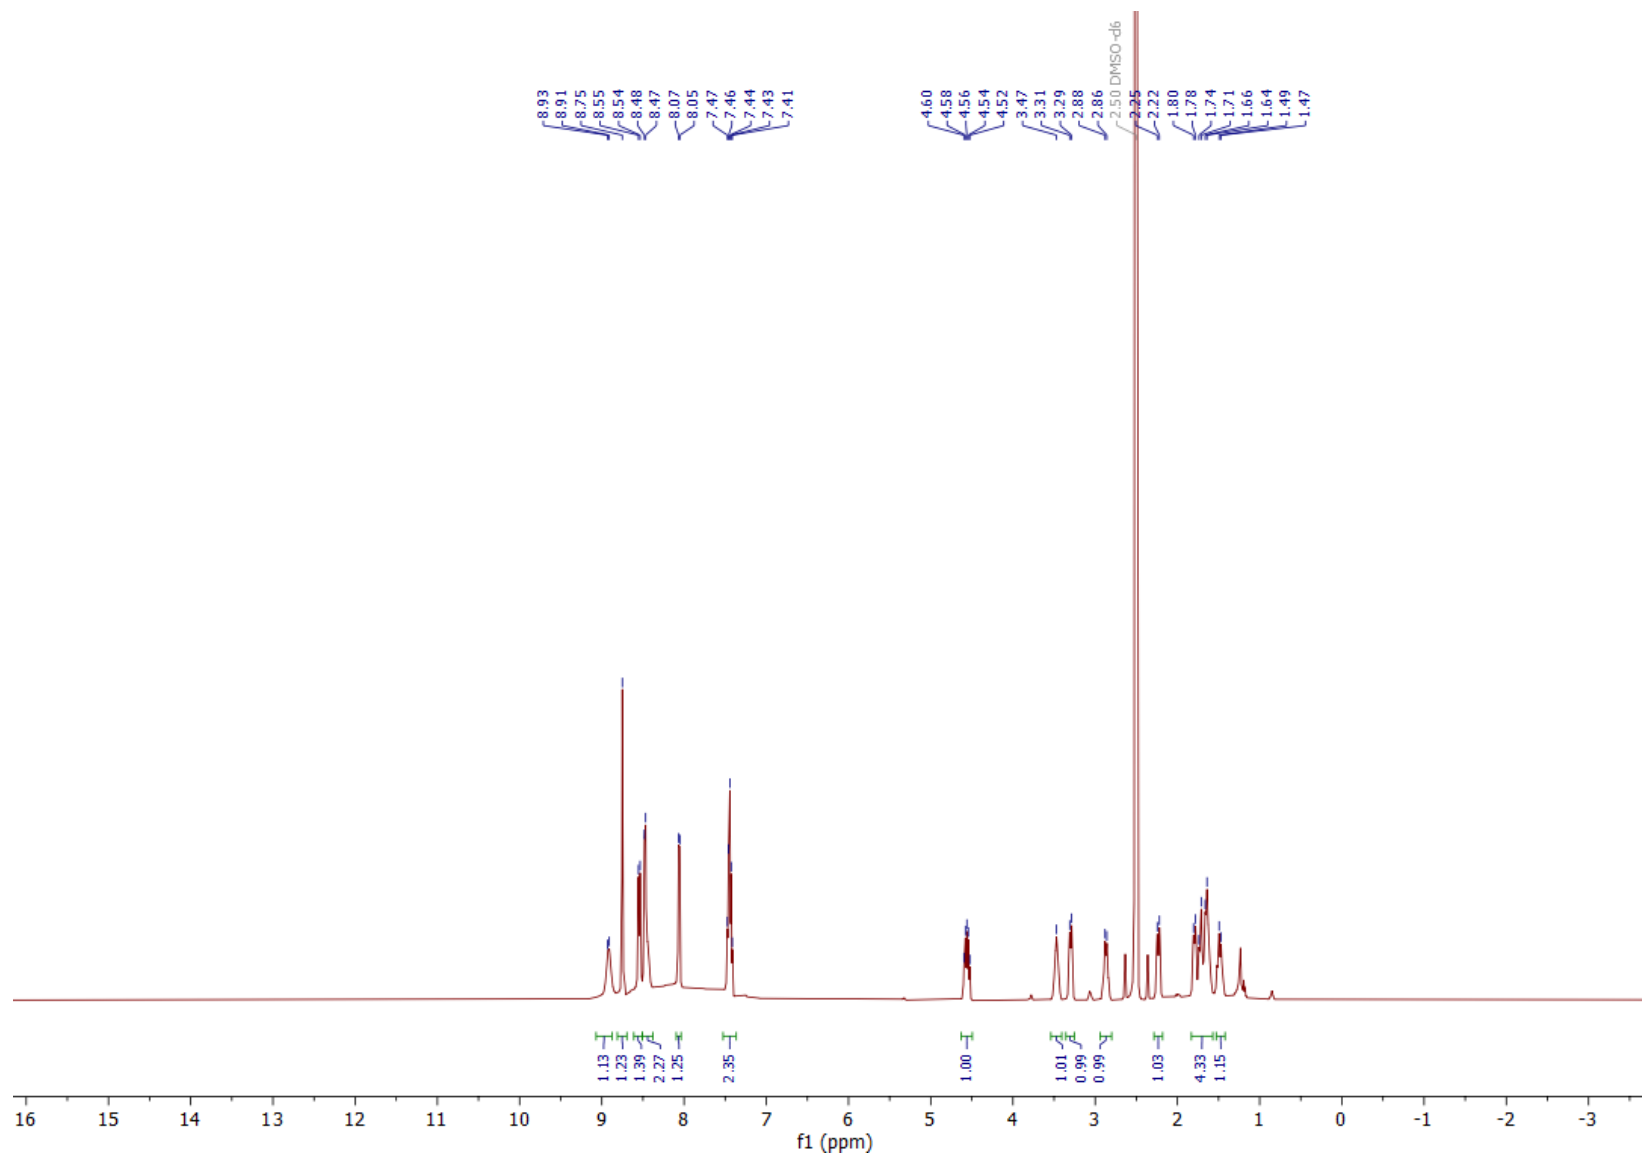

**Figure S126.** <sup>1</sup>H NMR spectrum of **5h** diastereomer 2.

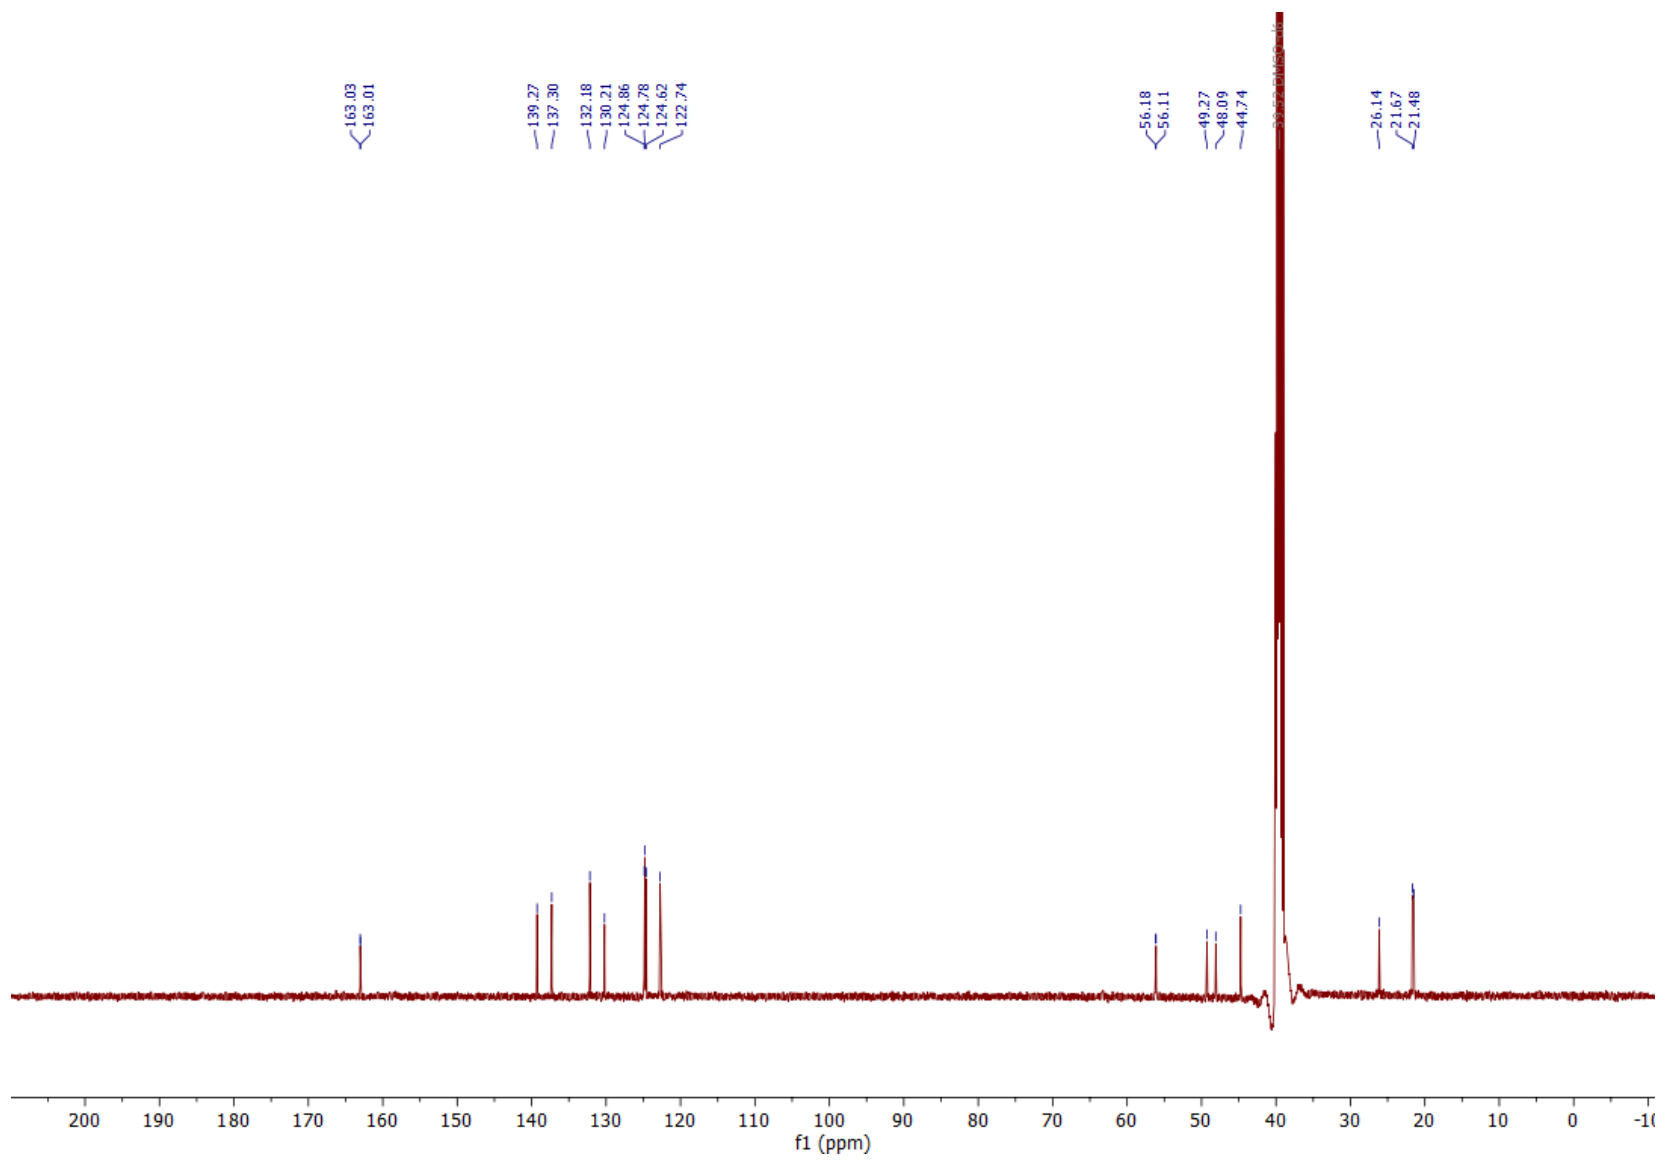

**Figure S127.** <sup>13</sup>C NMR spectrum of **5h** diastereomer 2.

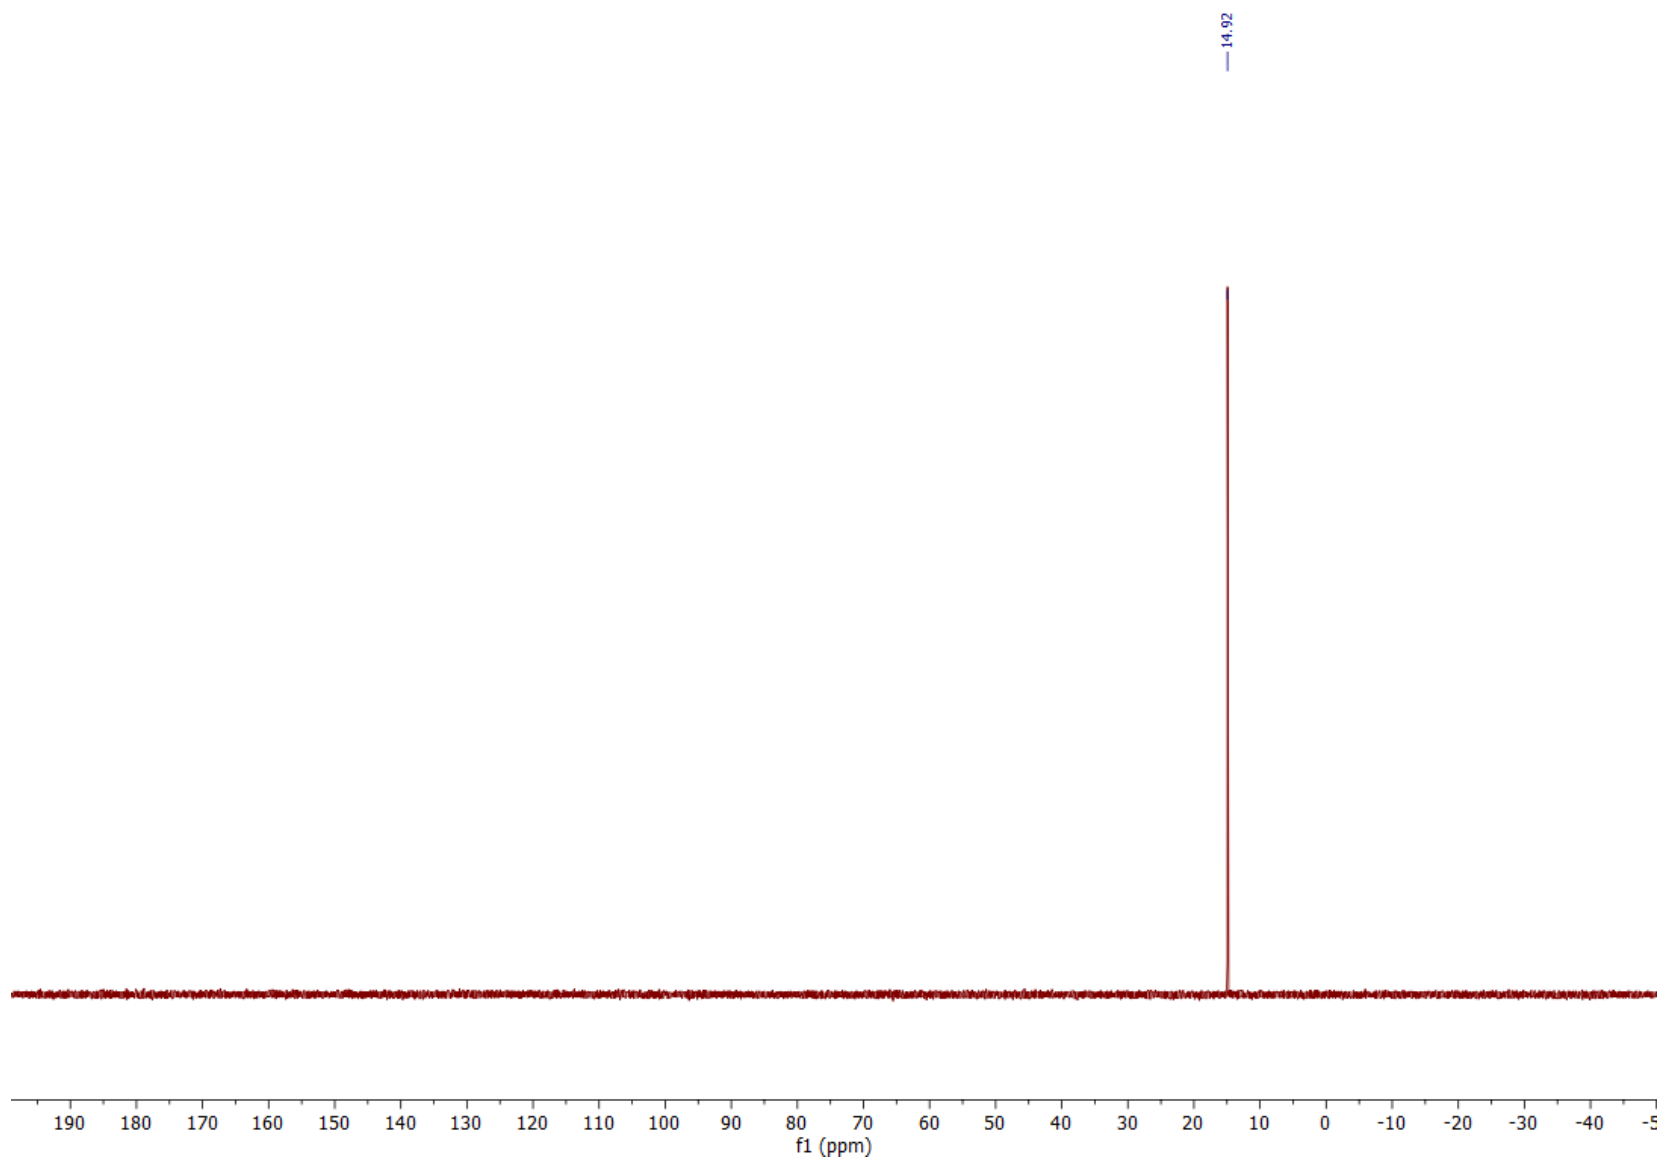

**Figure S128.**  $^{31}\text{P}$  NMR spectrum of **5h** diastereomer 2.

(Piperidin-2-yl(2-(thiophen-2-yl)acetamido)methyl)phosphonic acid hydrochloride (**5i**)

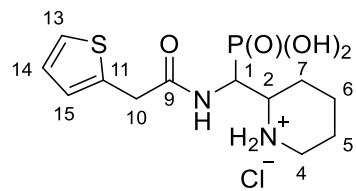

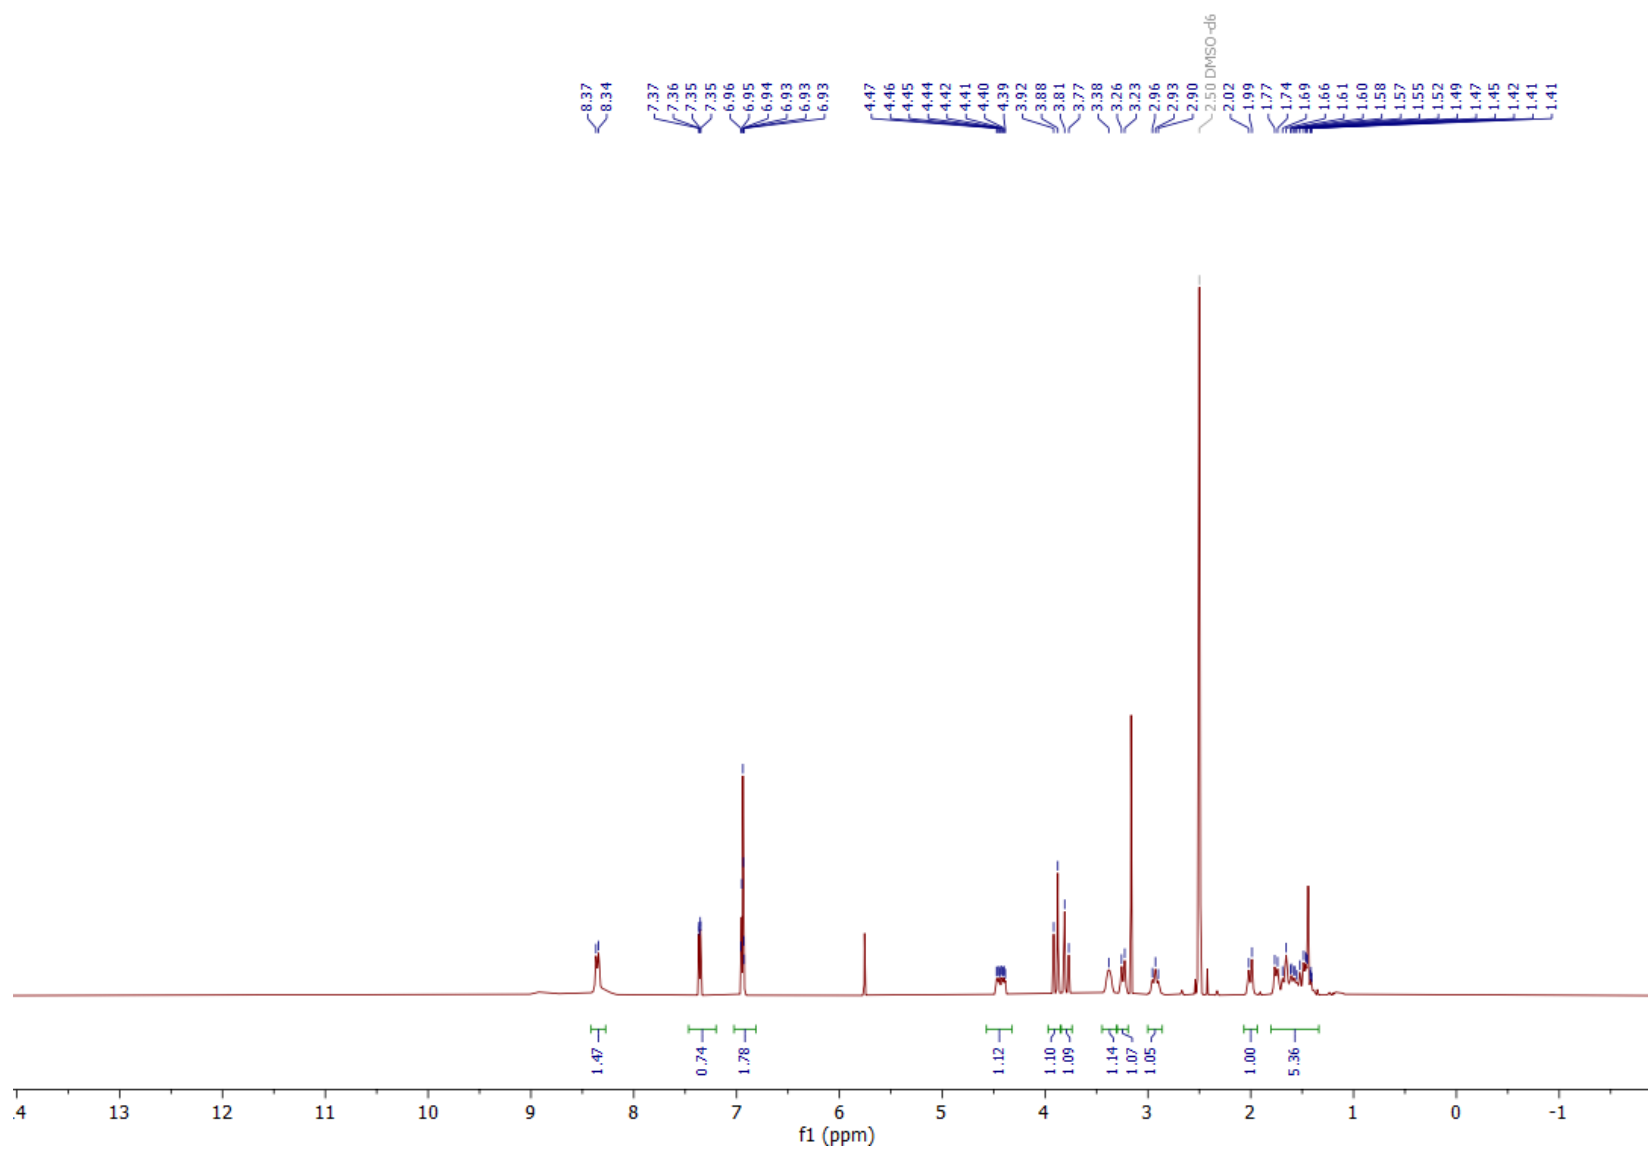

**Figure S129.**  $^1\text{H}$  NMR spectrum of **5i** diastereomer 1.

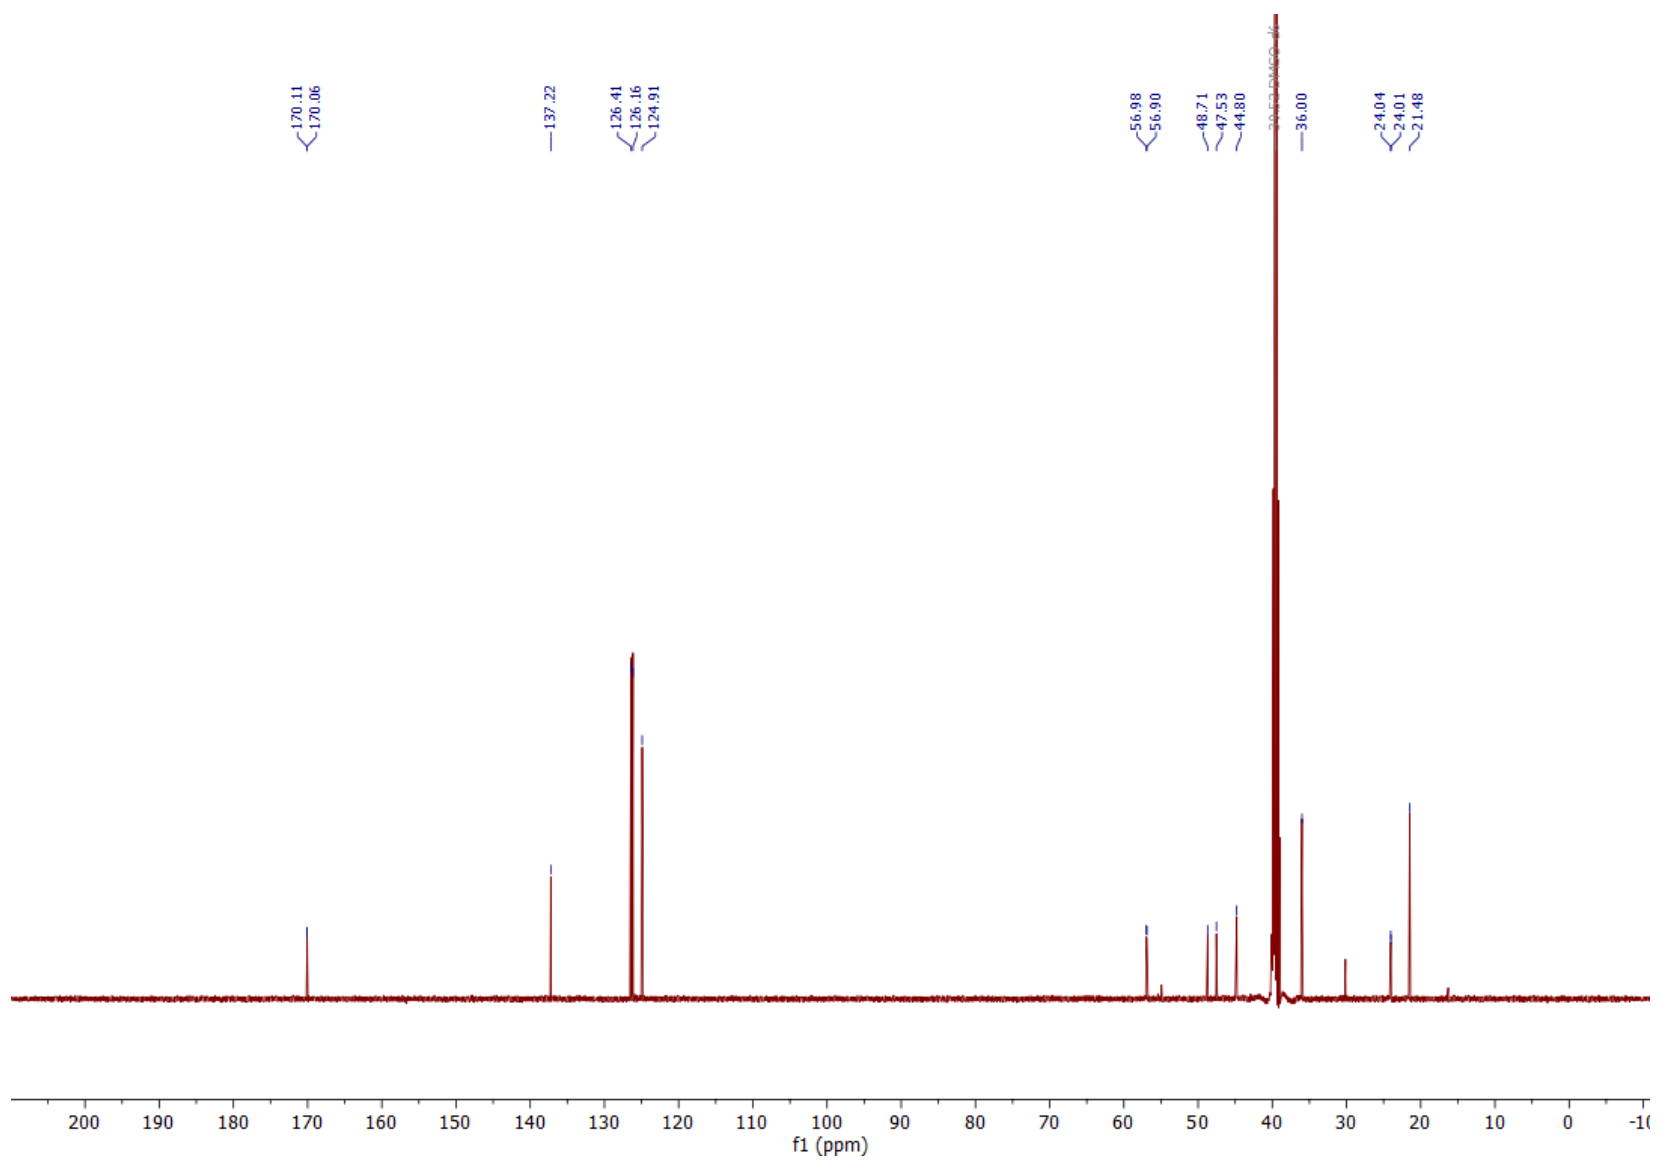

**Figure S130.** <sup>13</sup>C NMR spectrum of **5i** diastereomer 1.

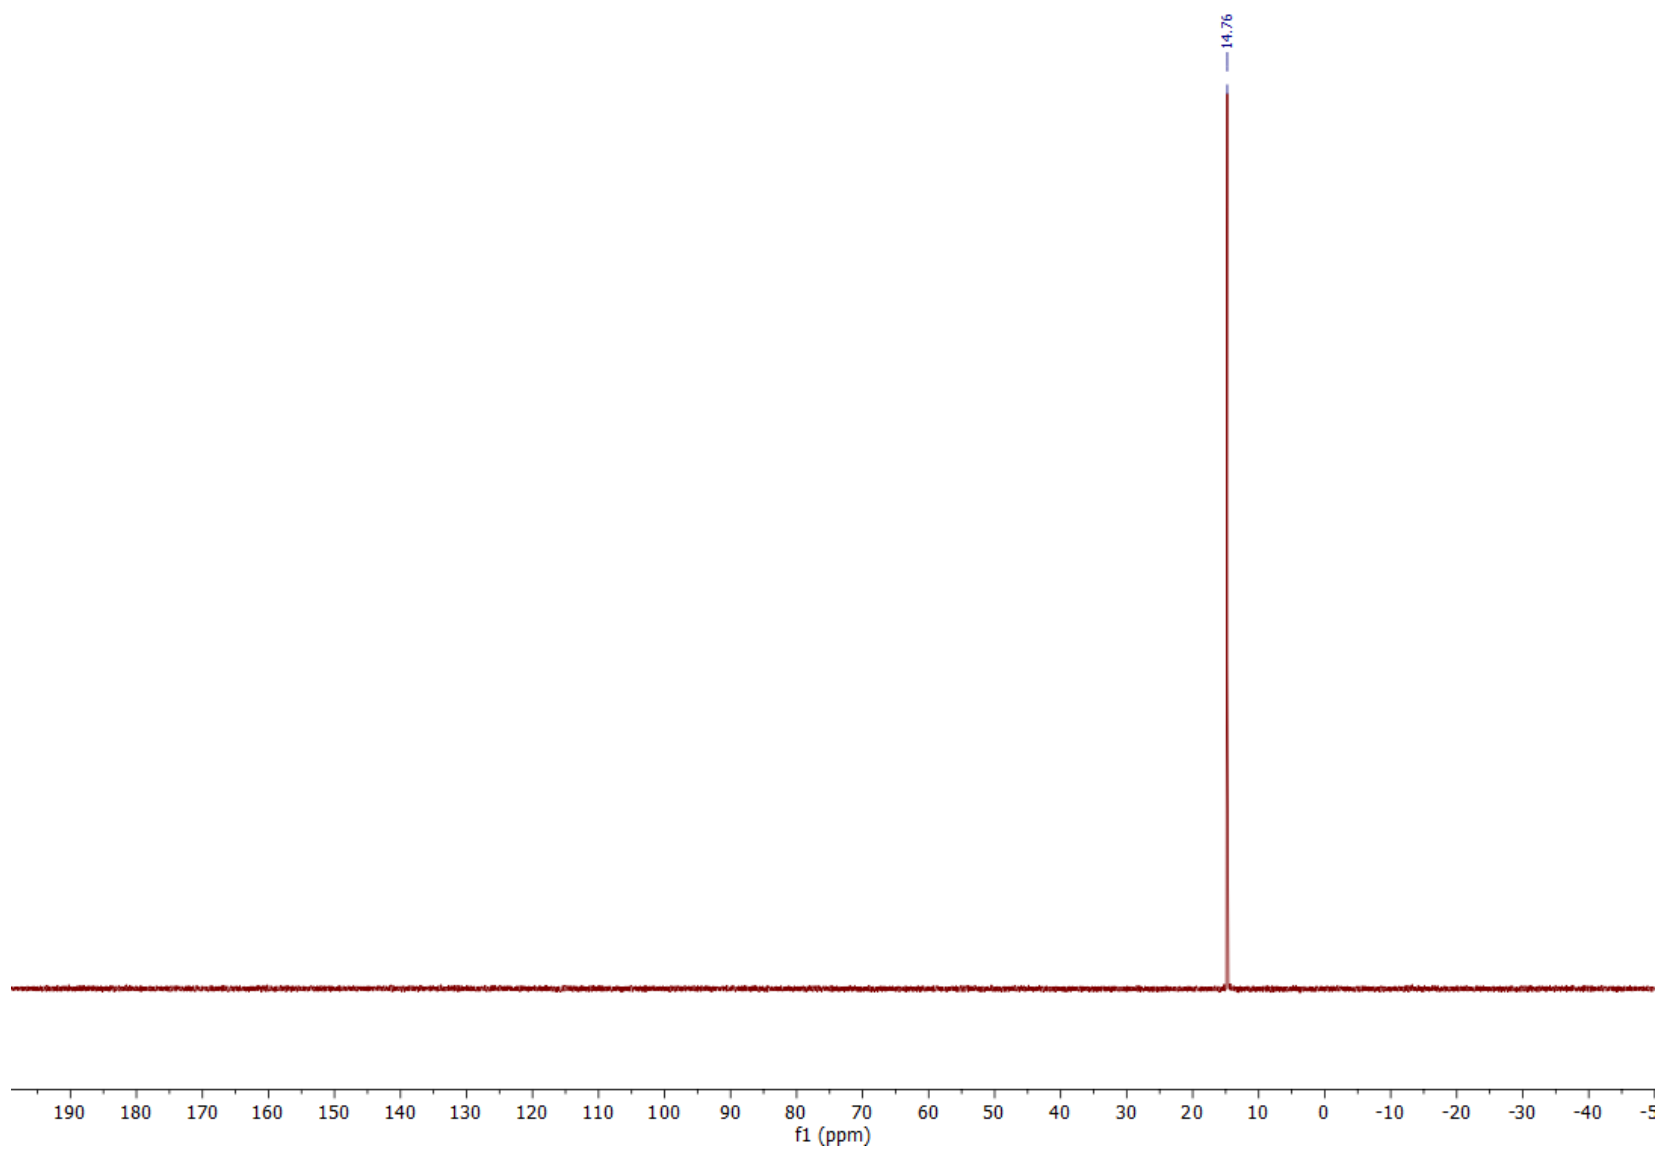

**Figure S131.**  $^{31}\text{P}$  NMR spectrum of **5i** diastereomer 1.



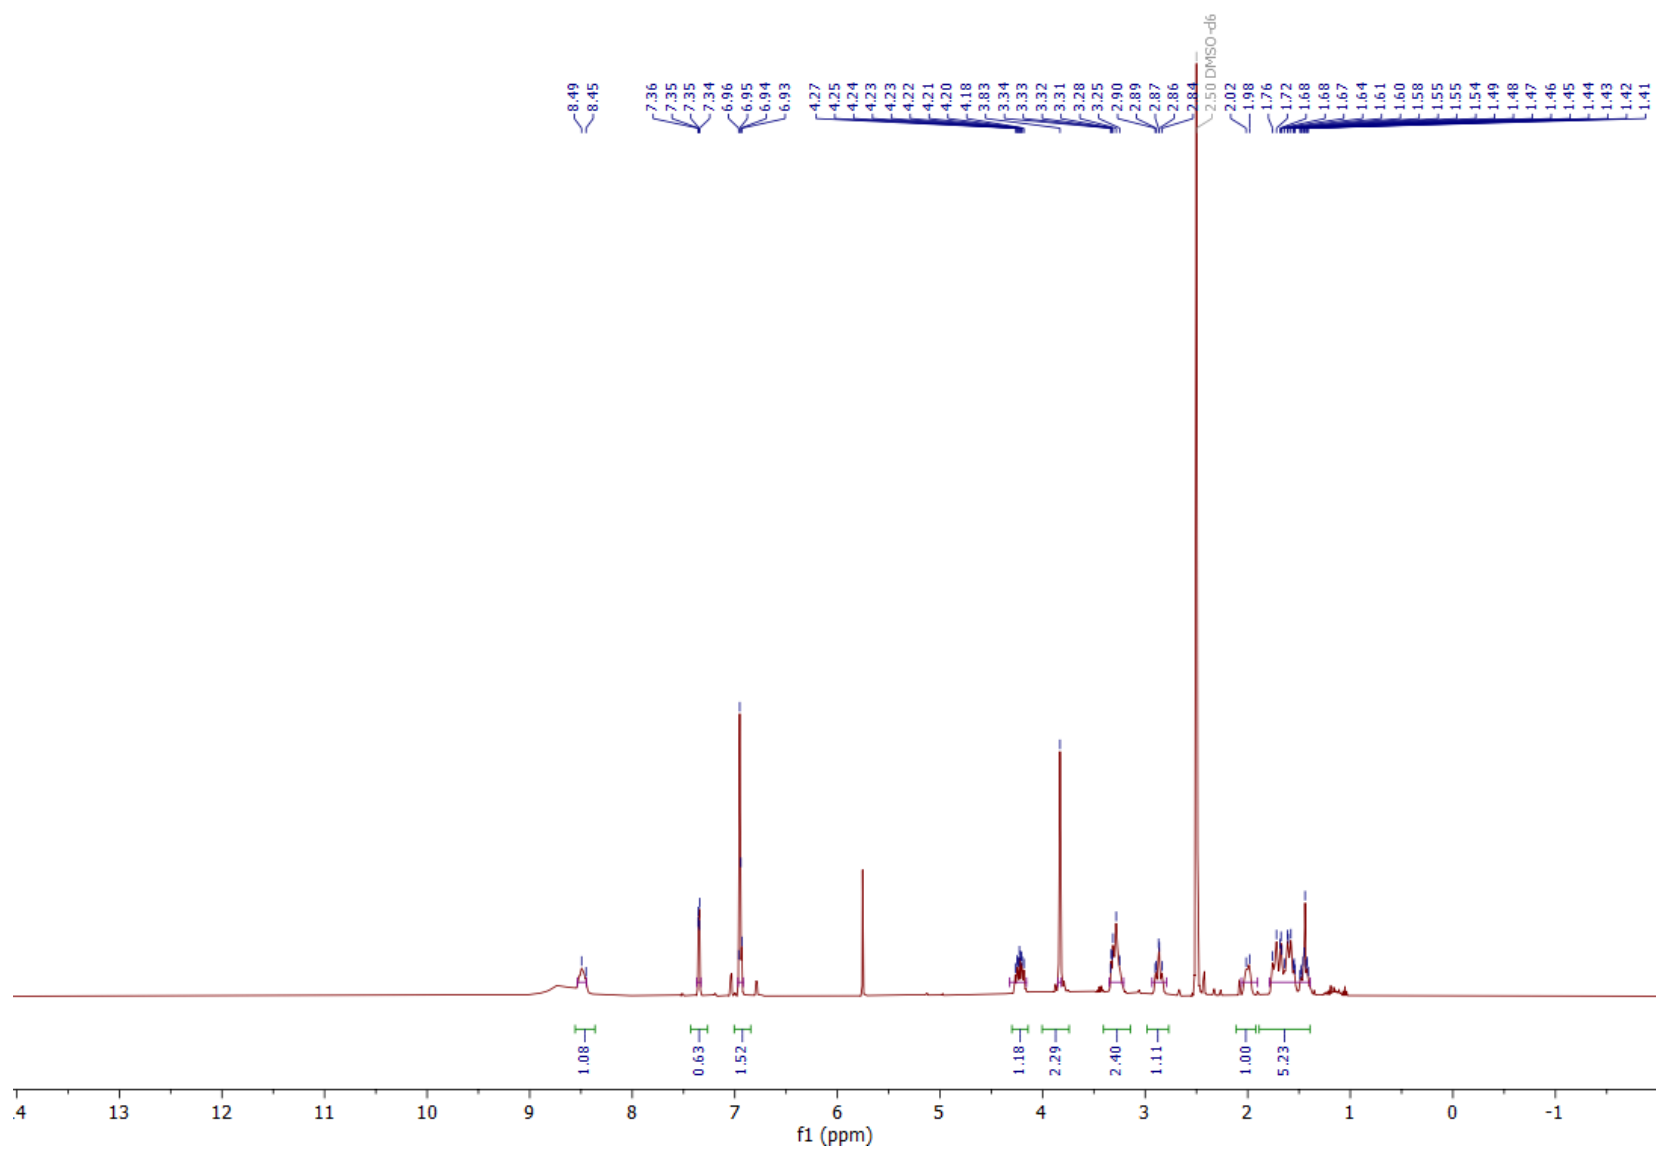

**Figure S132.** <sup>1</sup>H NMR spectrum of **5i** diastereomer 2.

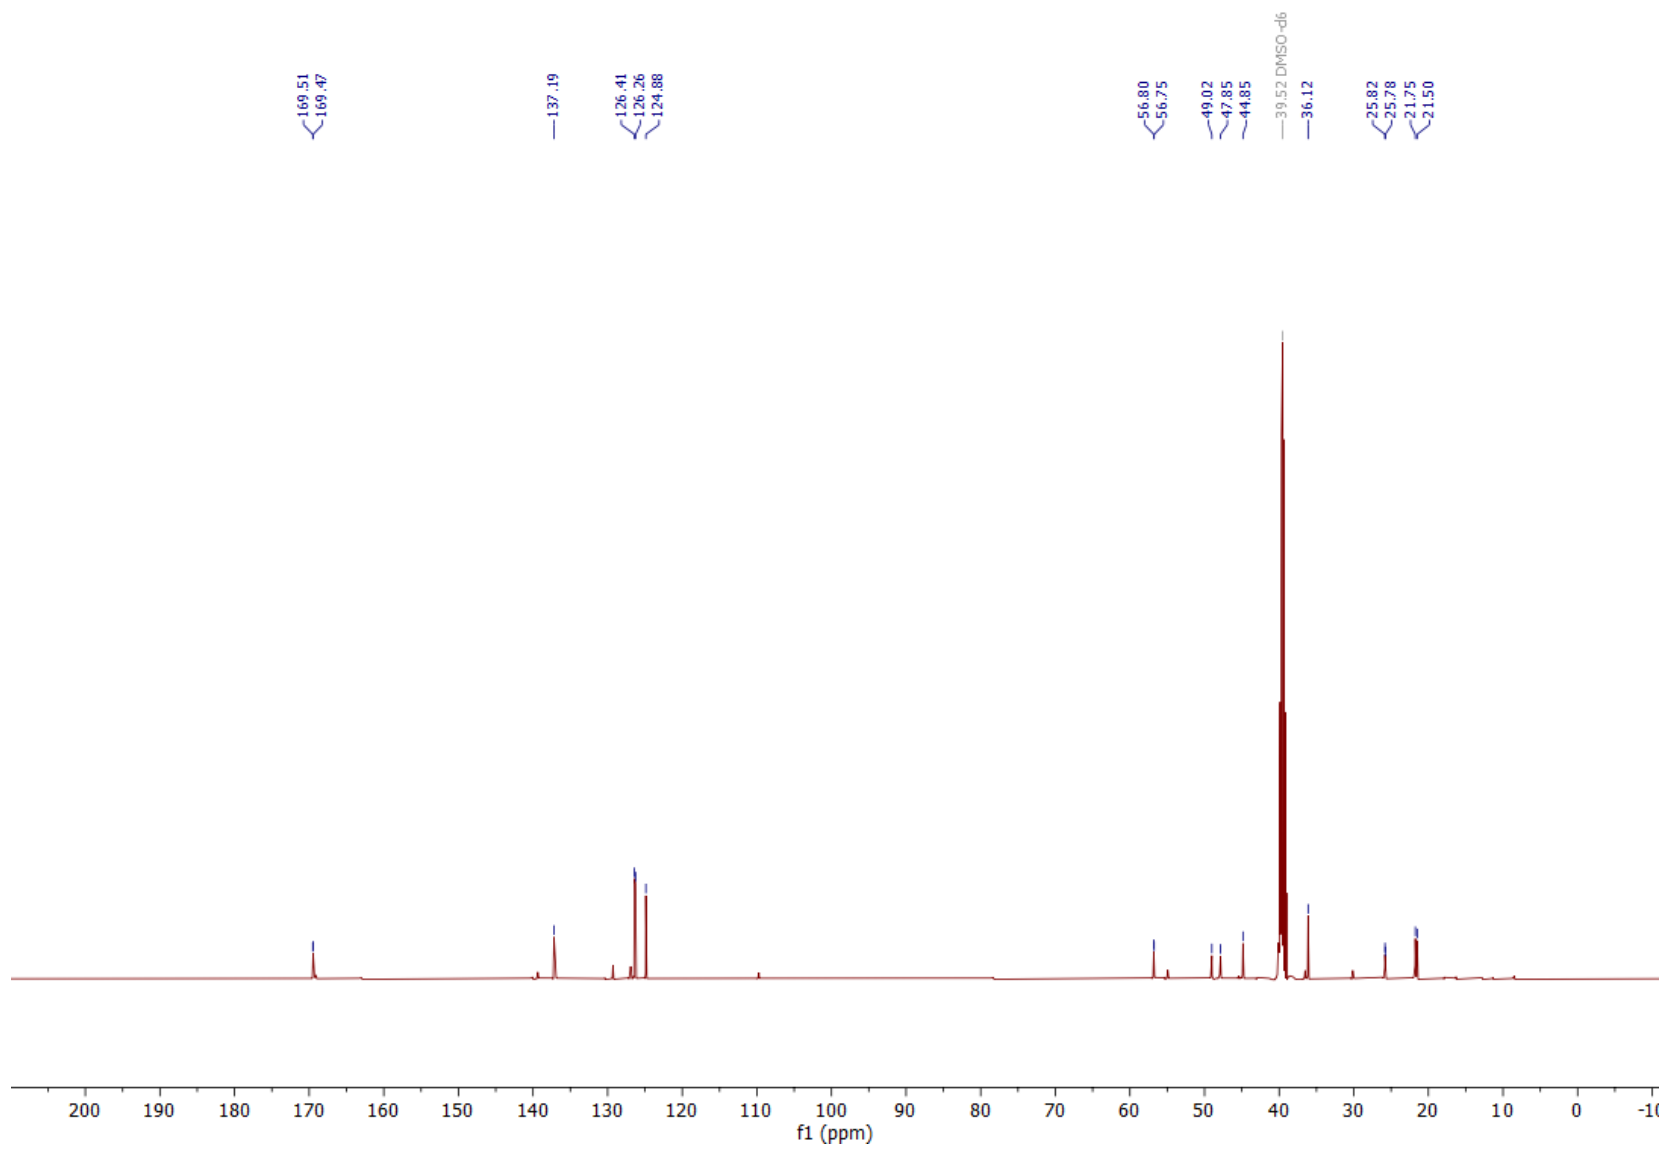

**Figure S133.** <sup>13</sup>C NMR spectrum of **5i** diastereomer 2.

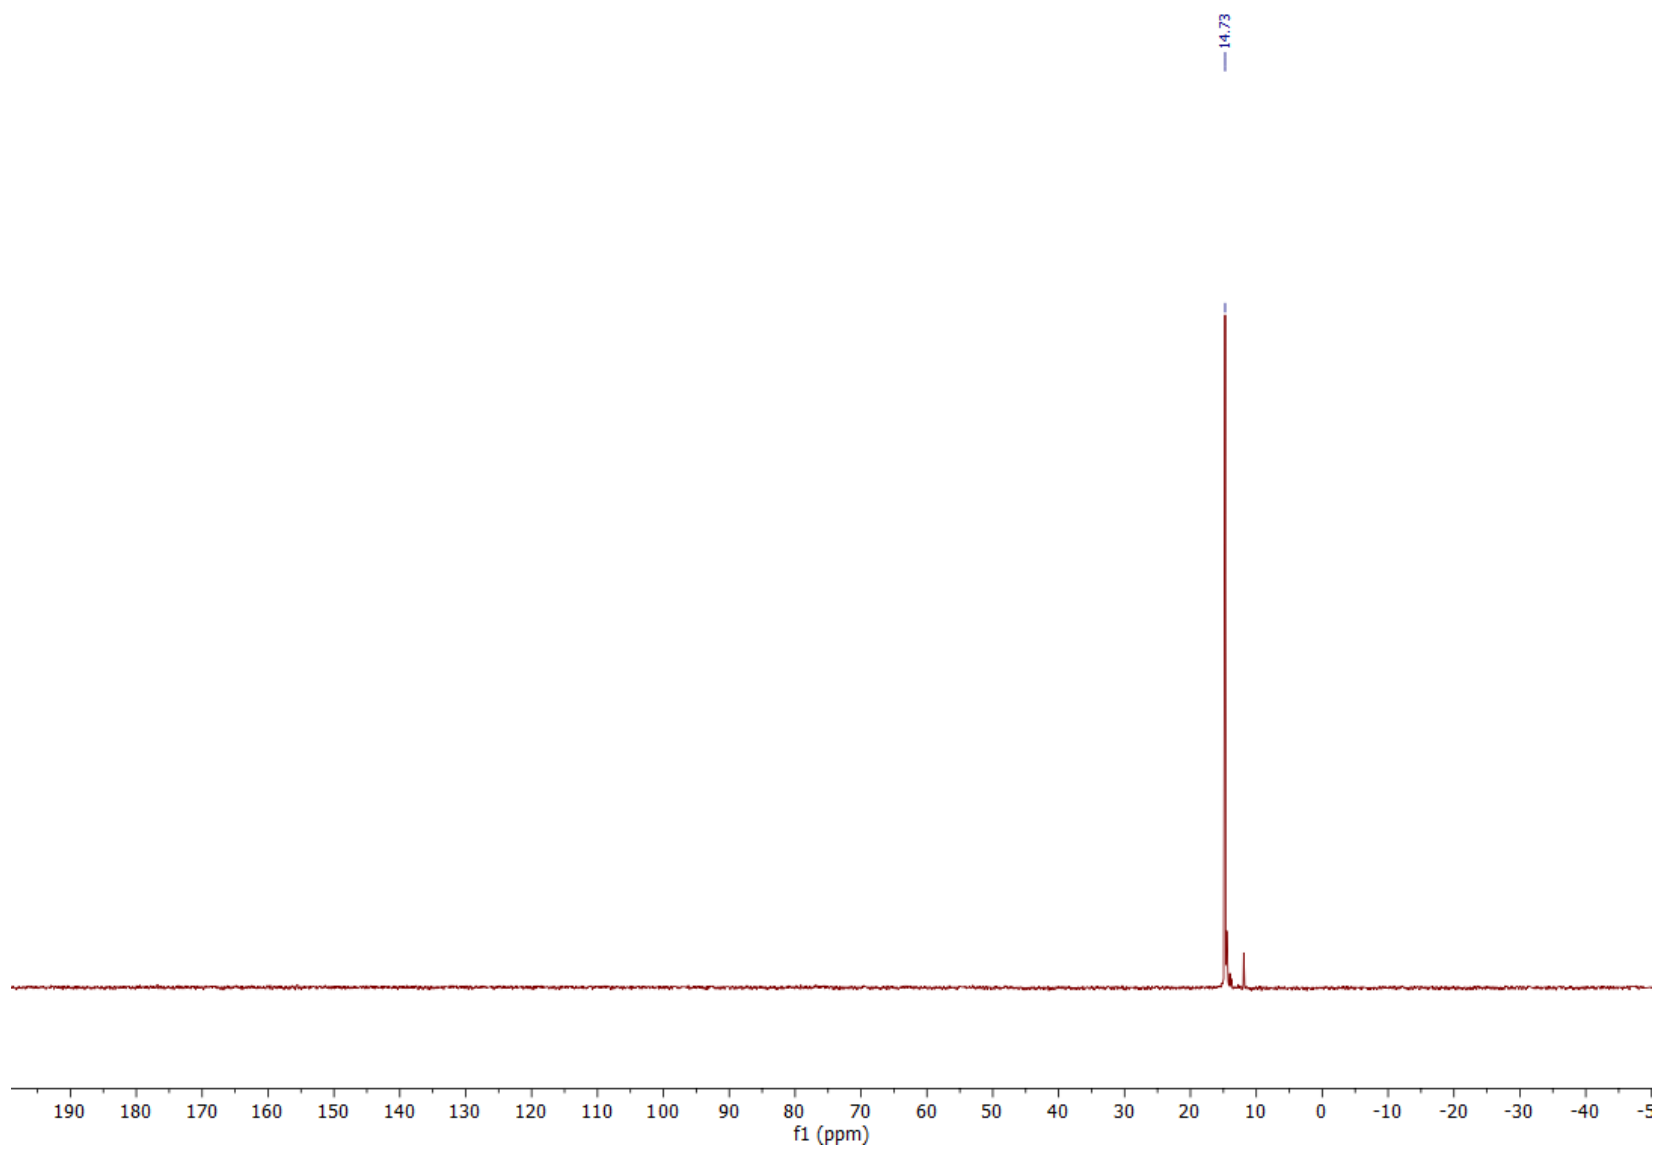

**Figure S134.**  $^{31}\text{P}$  NMR spectrum of **5i** diastereomer 2.

(Piperidin-2-yl(2-(thiophen-3-yl)acetamido)methyl)phosphonic acid hydrochloride (**5j**)

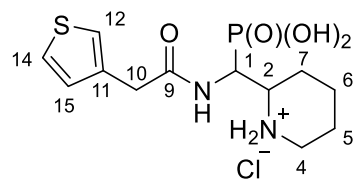

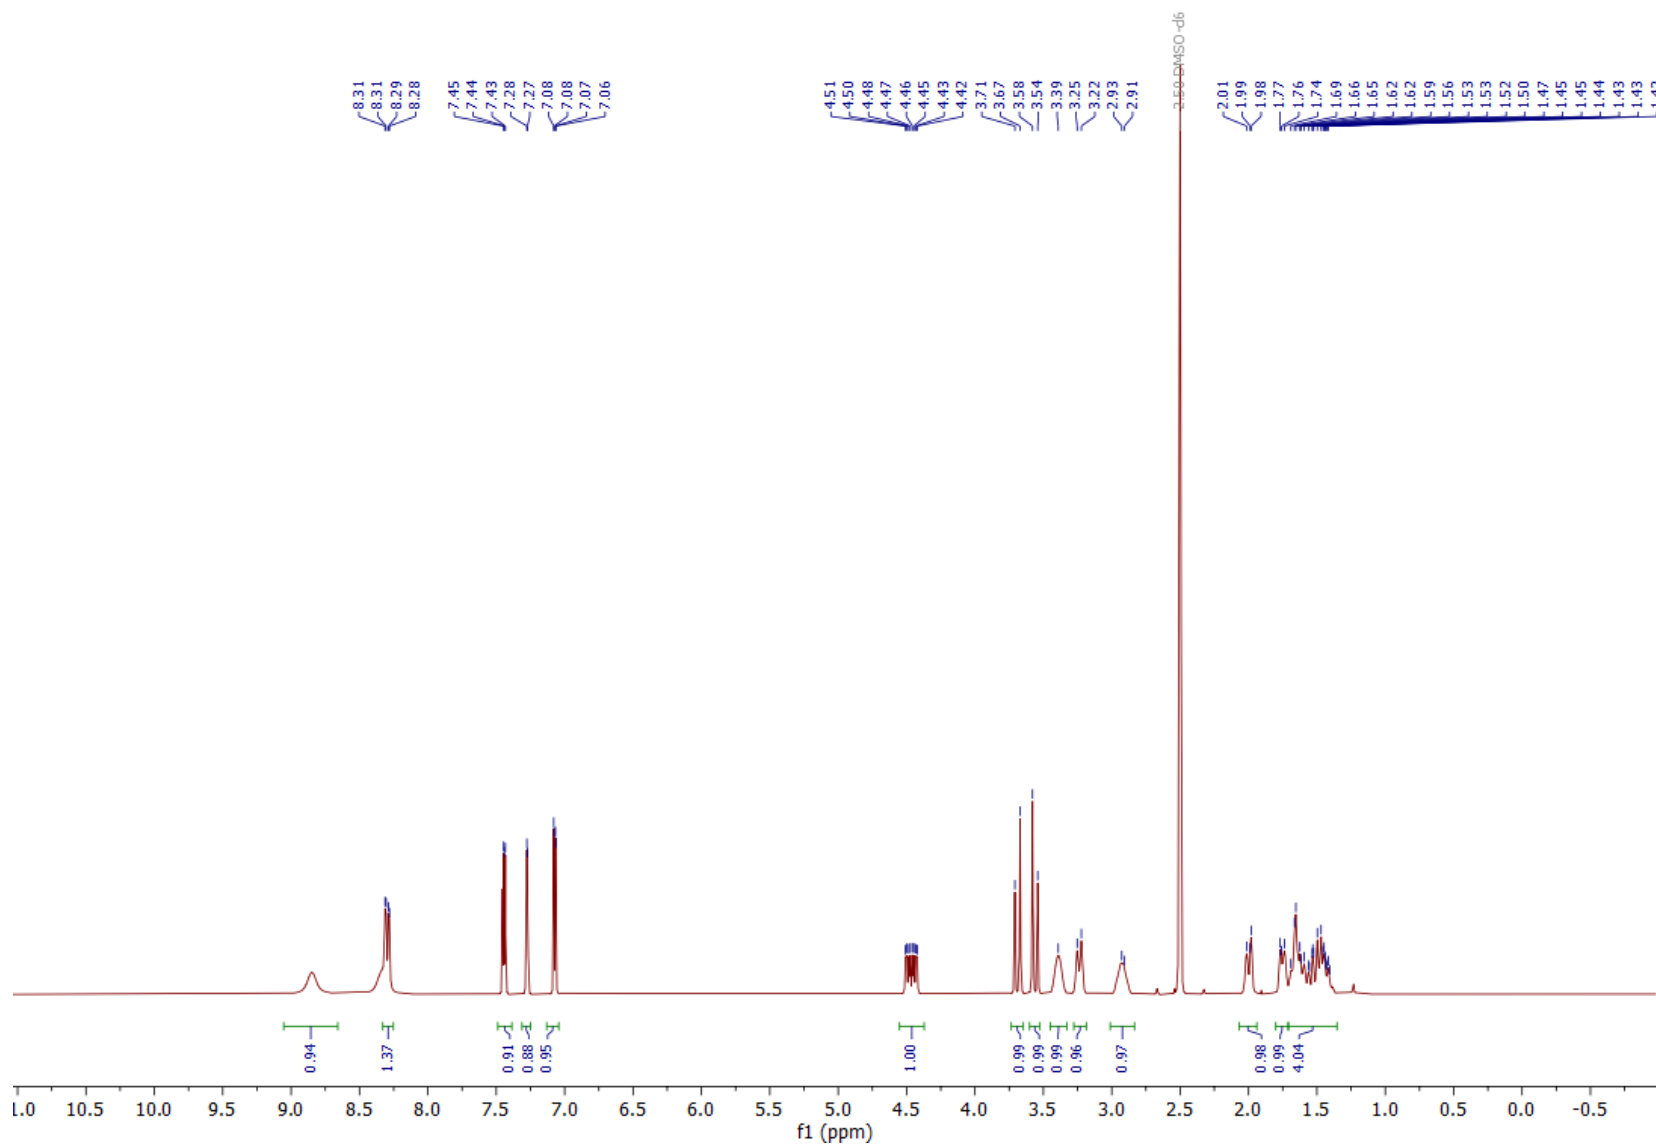

**Figure S135.**  $^1\text{H}$  NMR spectrum of **5j** diastereomer 1.

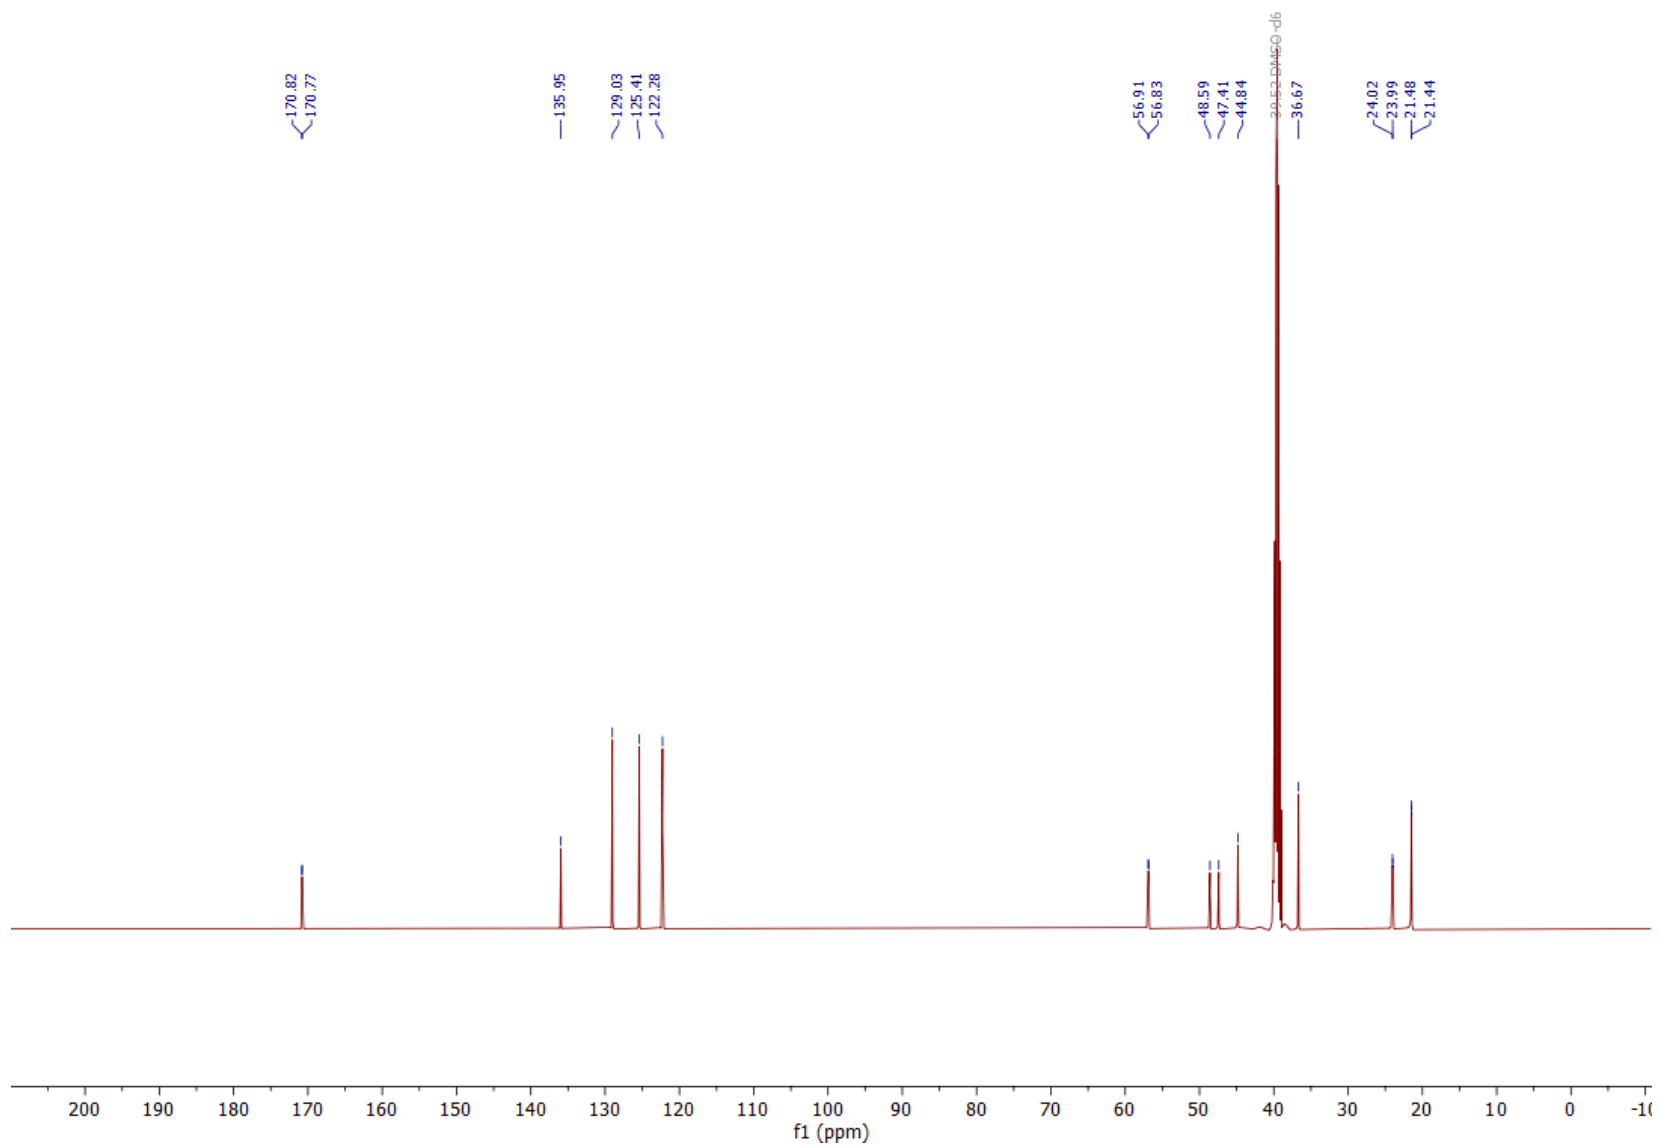

**Figure S136.** <sup>13</sup>C NMR spectrum of **5j** diastereomer 1.

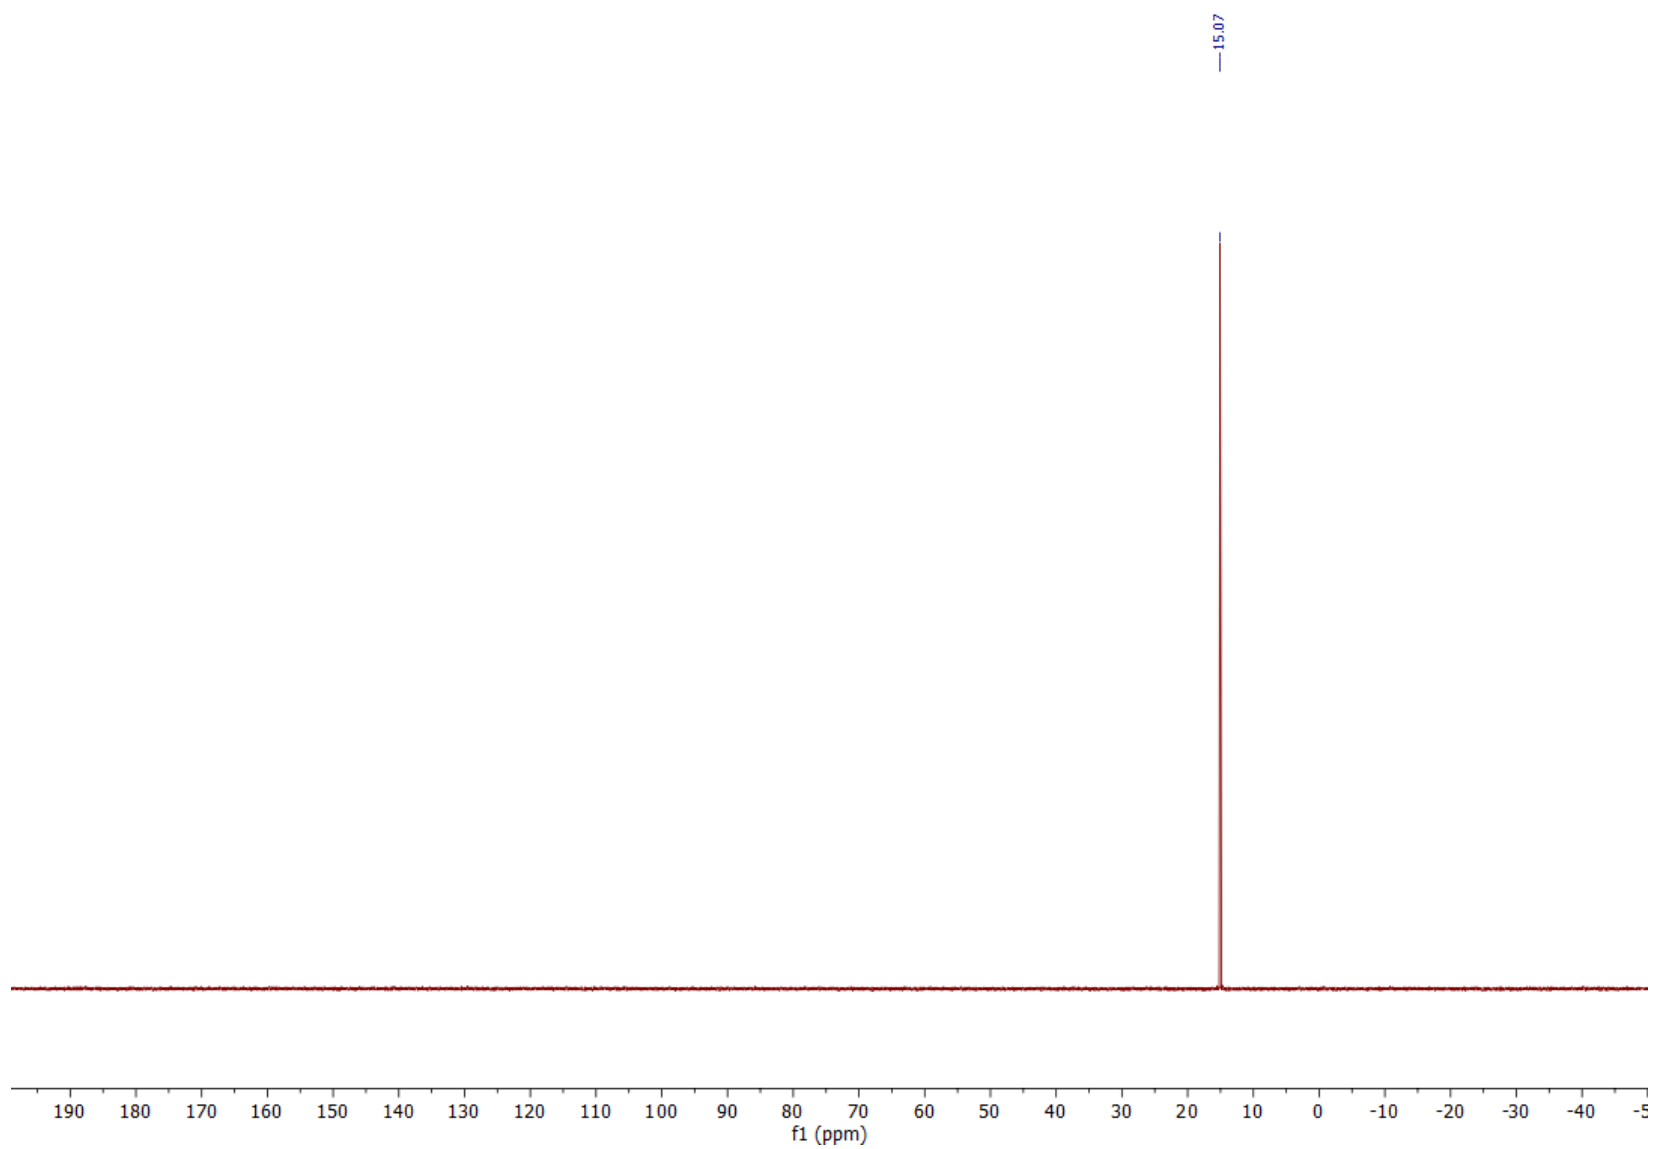

**Figure S137.**  $^{31}\text{P}$  NMR spectrum of **5j** diastereomer 1.

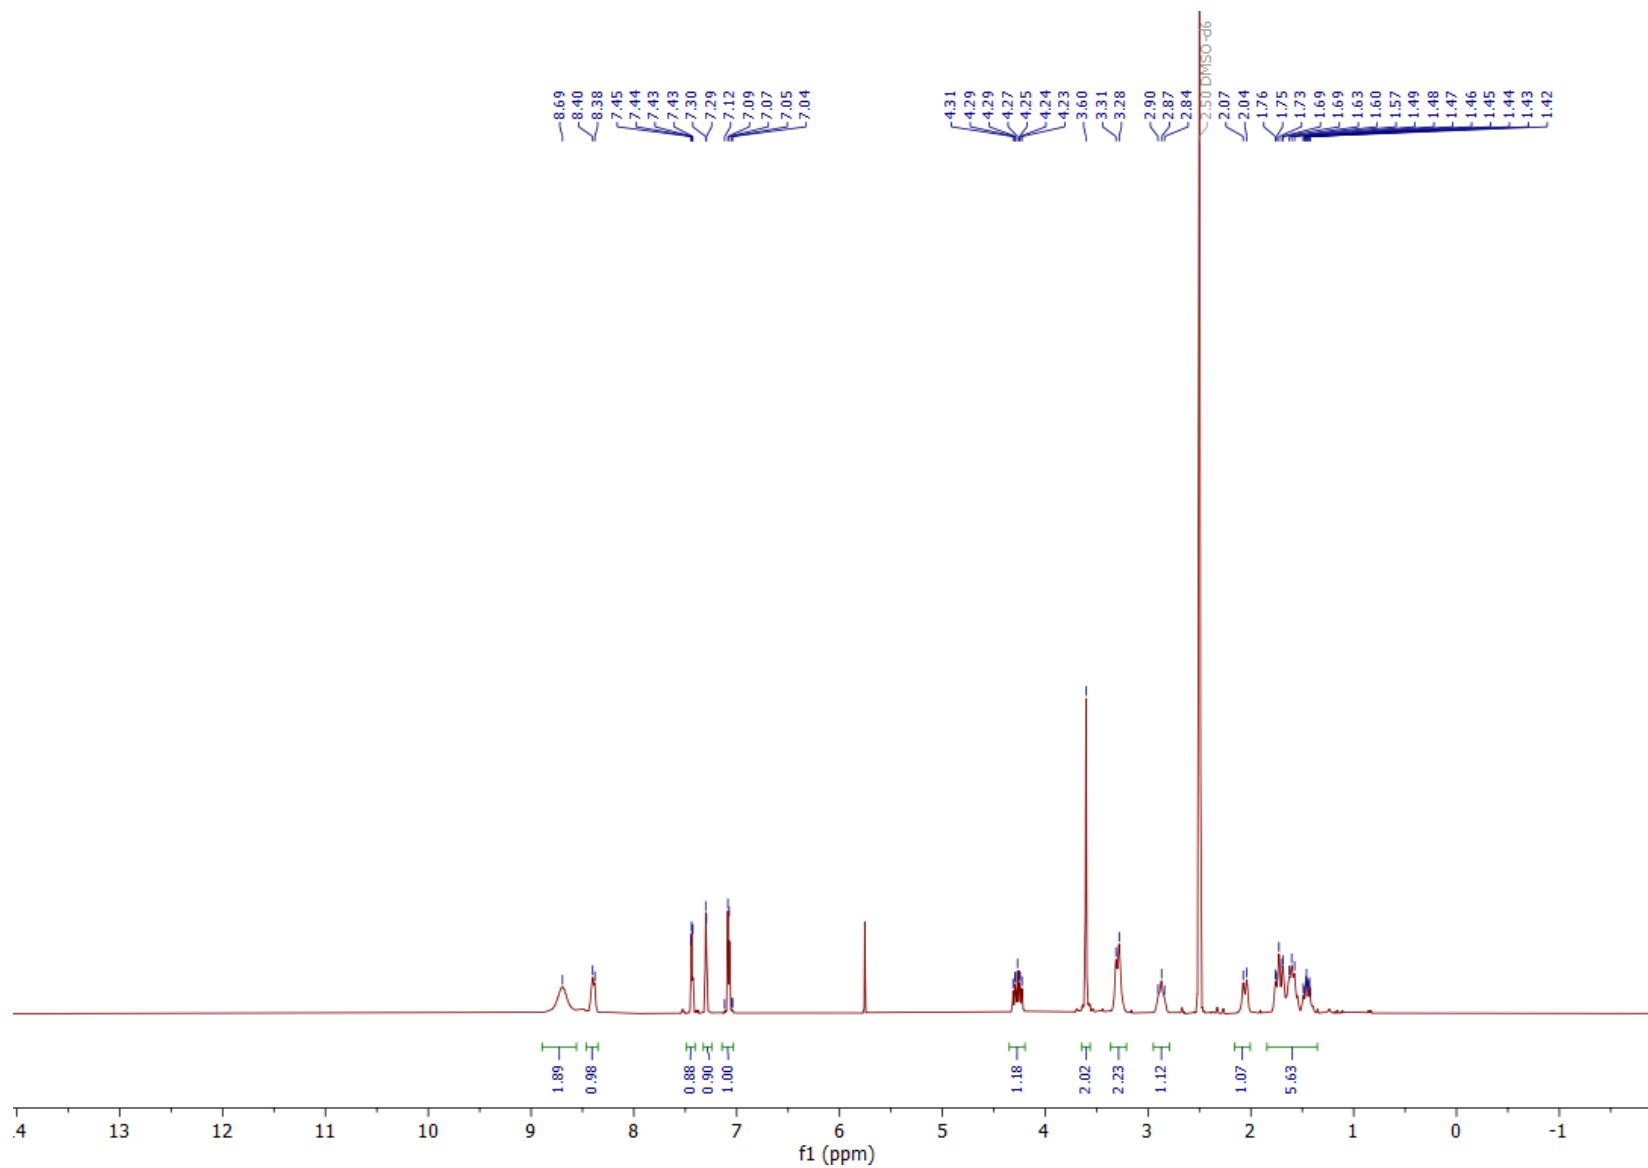

Figure S138. <sup>1</sup>H NMR spectrum of **5j** diastereomer 2.



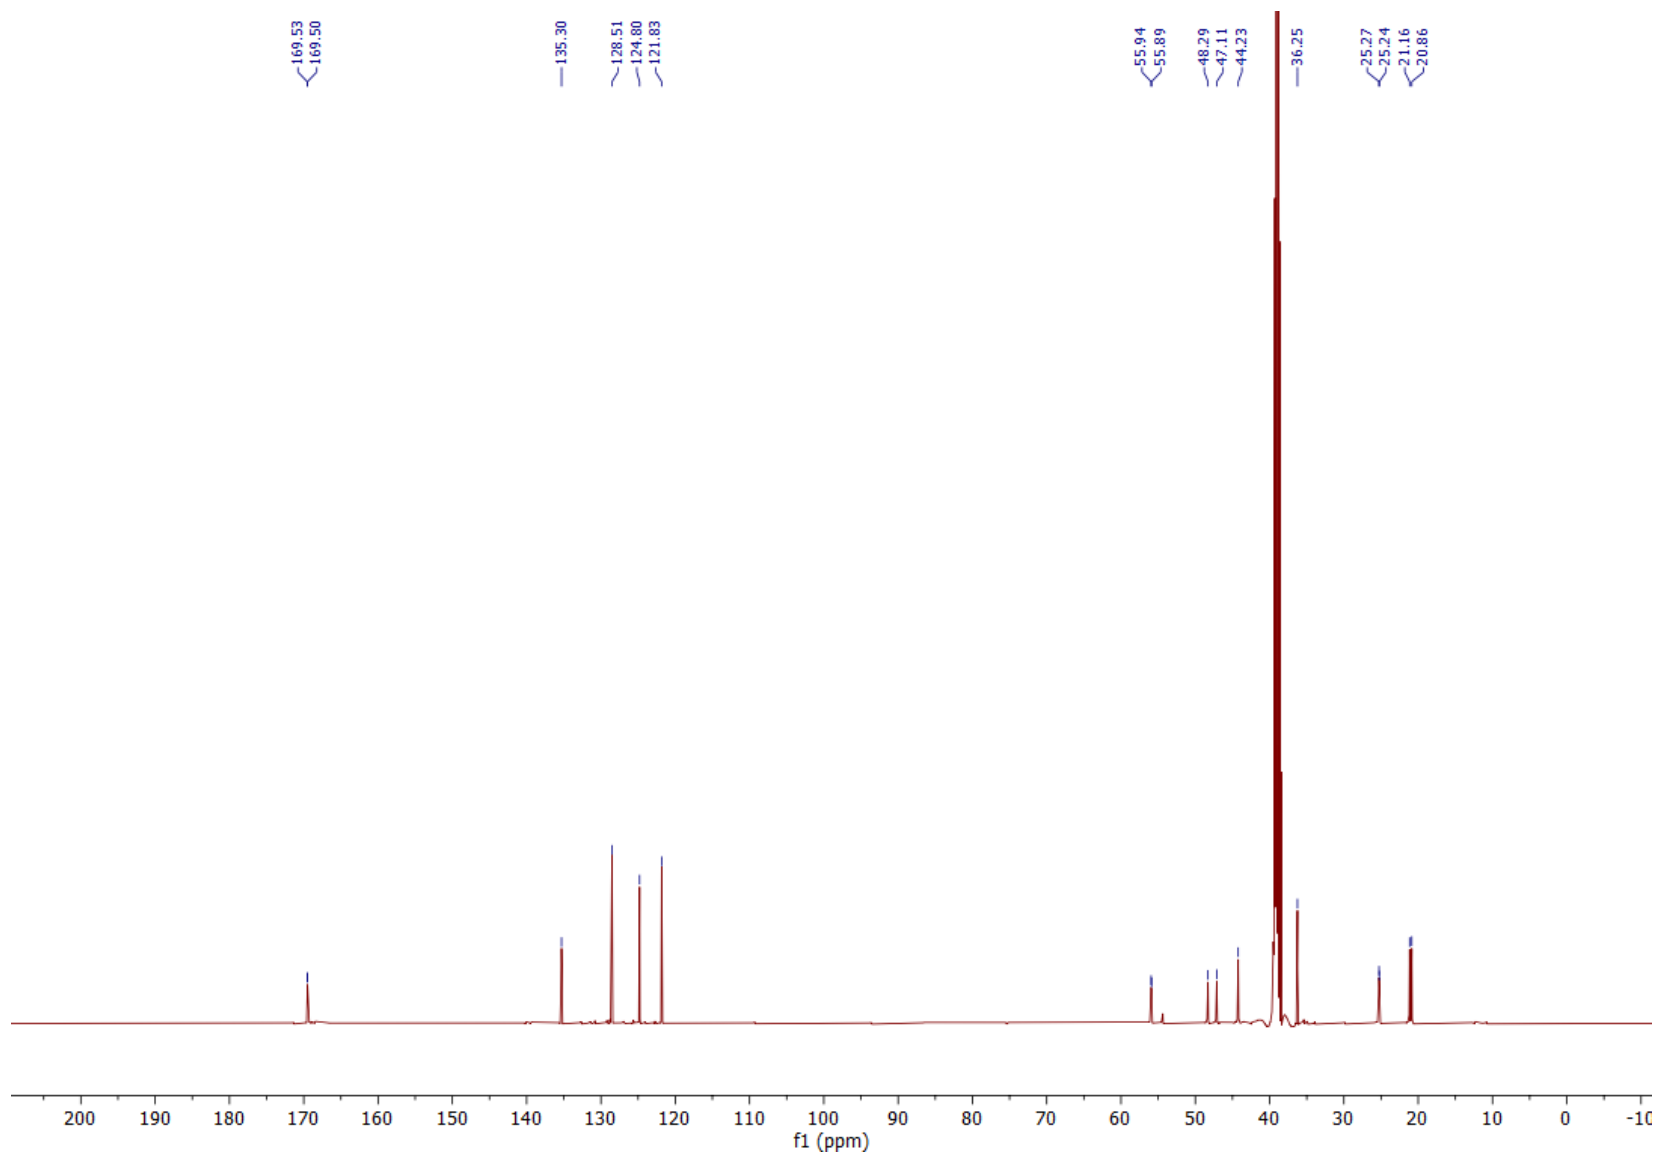

**Figure S139.**  $^{13}\text{C}$  NMR spectrum of **5j** diastereomer 2.

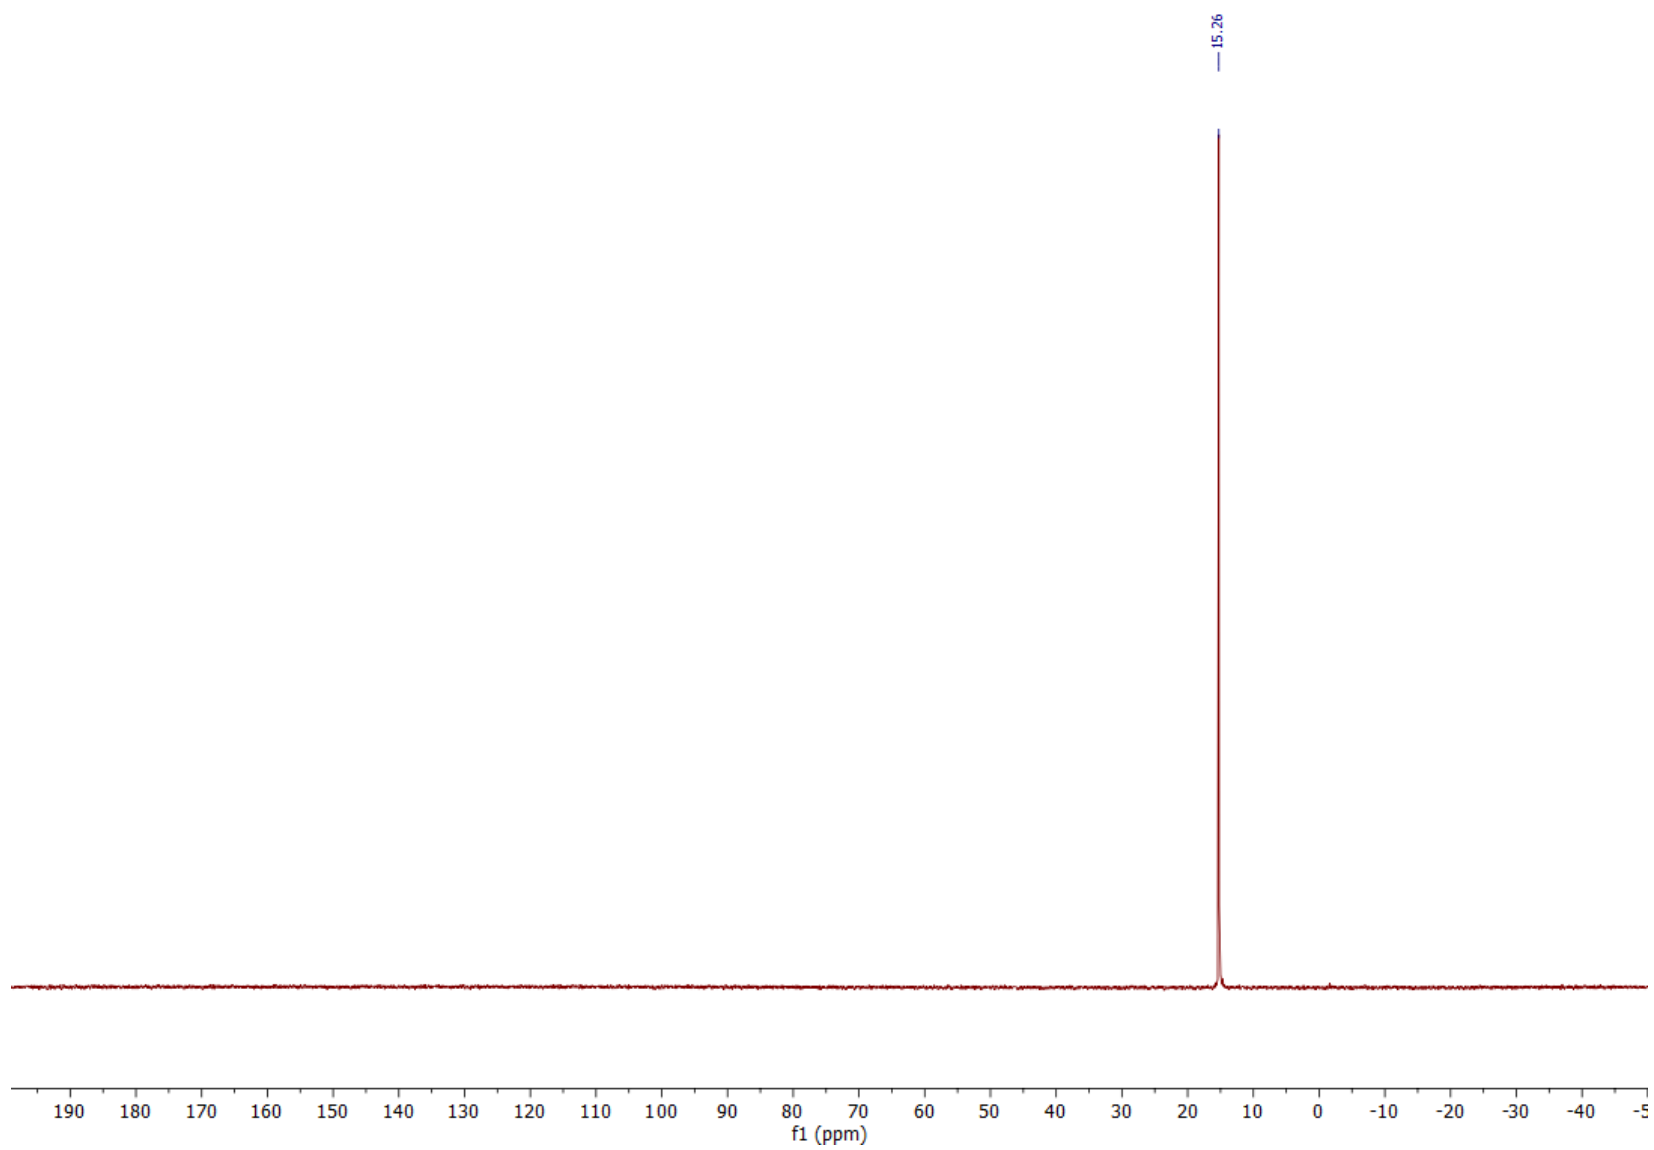

**Figure S140.**  $^{31}\text{P}$  NMR spectrum of **5j** diastereomer 2.

((2-(Benzo[*b*]thiophen-2-yl)acetamido)(piperidin-2-yl)methyl)phosphonic acid hydrochloride (**5k**)

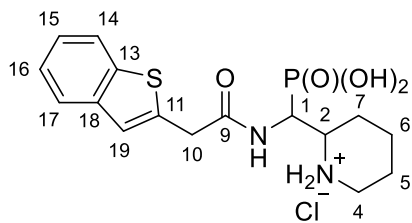

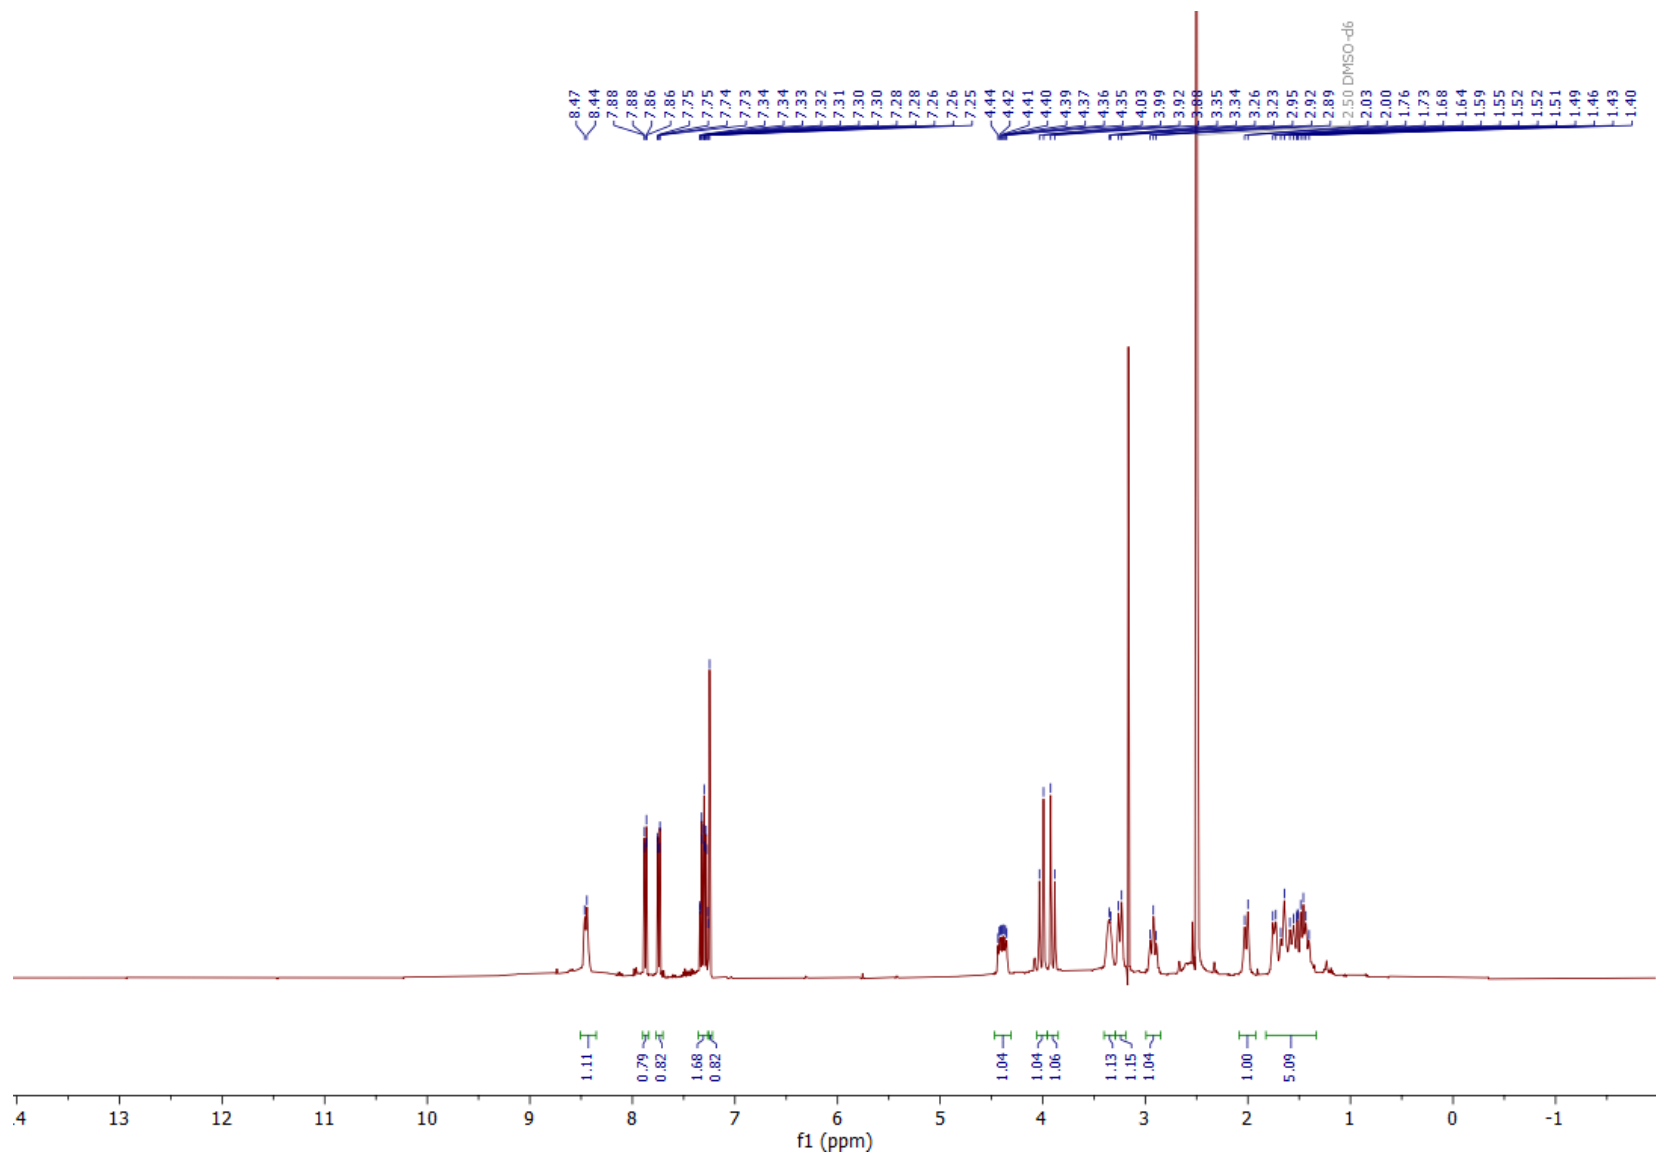

**Figure S141.**  $^1\text{H}$  NMR spectrum of **5k** diastereomer 1.

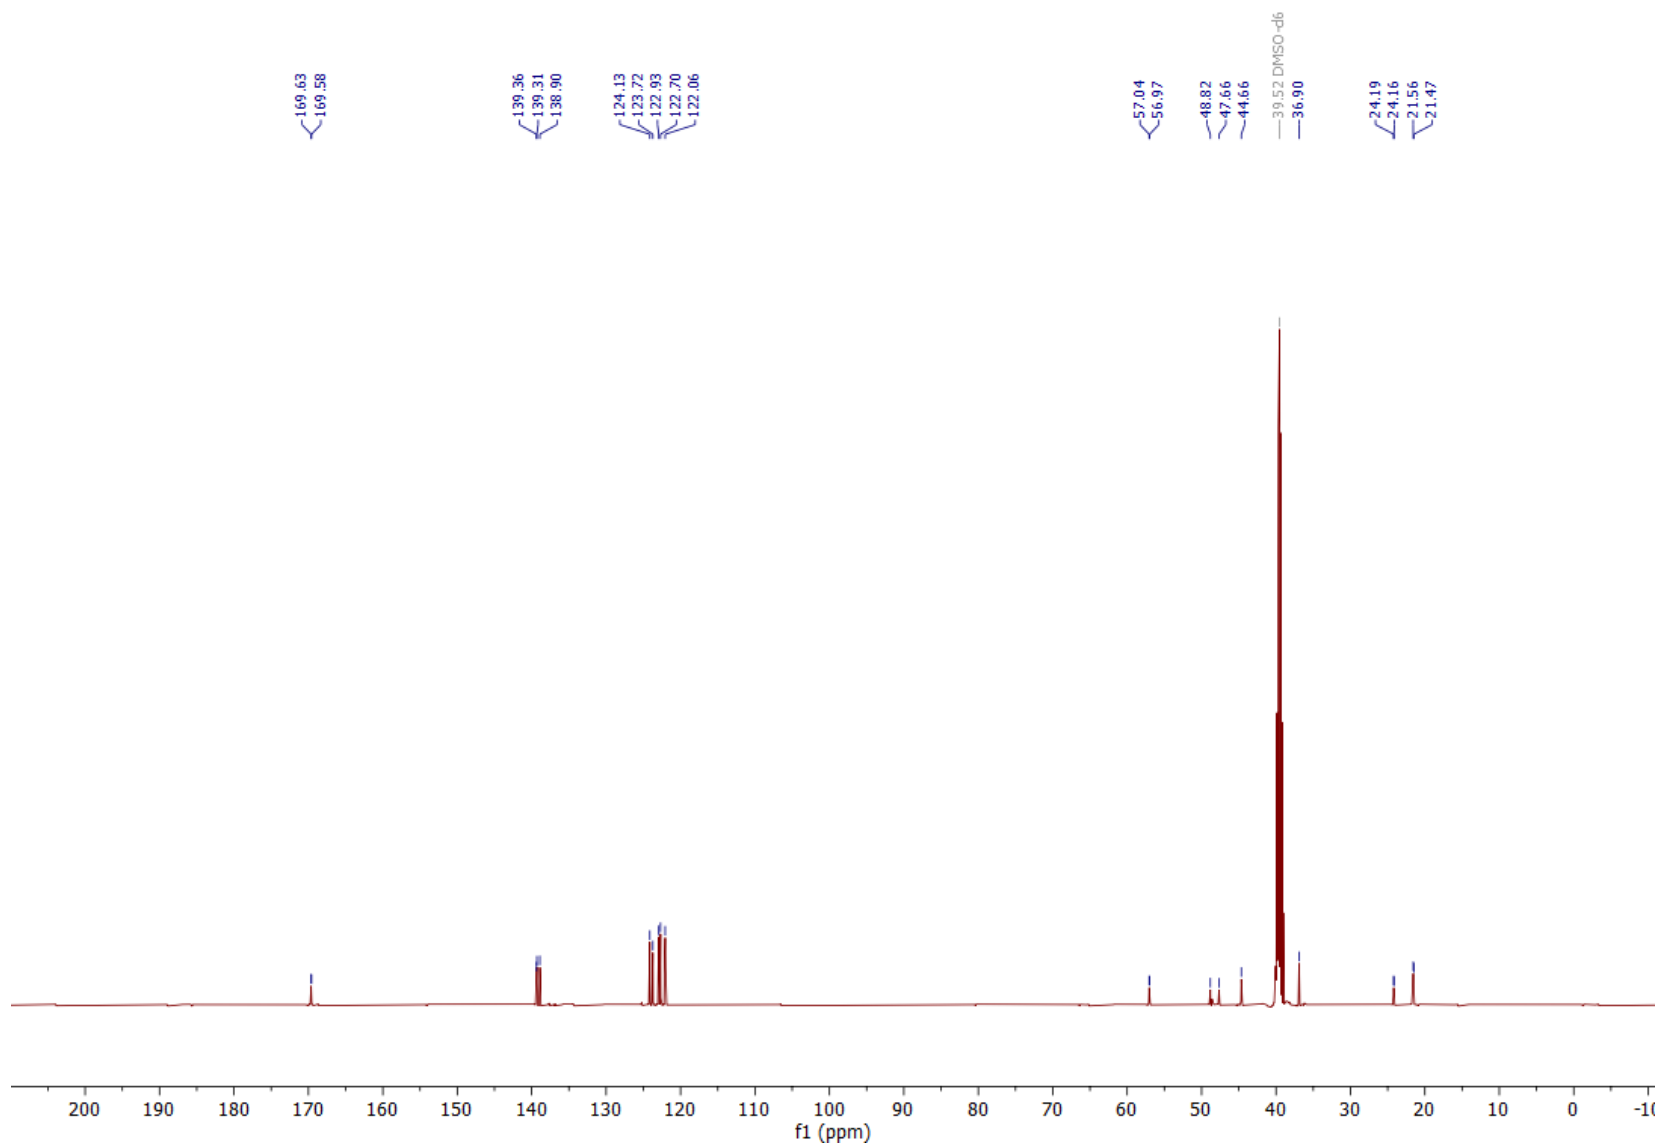

**Figure S142.** <sup>13</sup>C NMR spectrum of **5k** diastereomer 1.

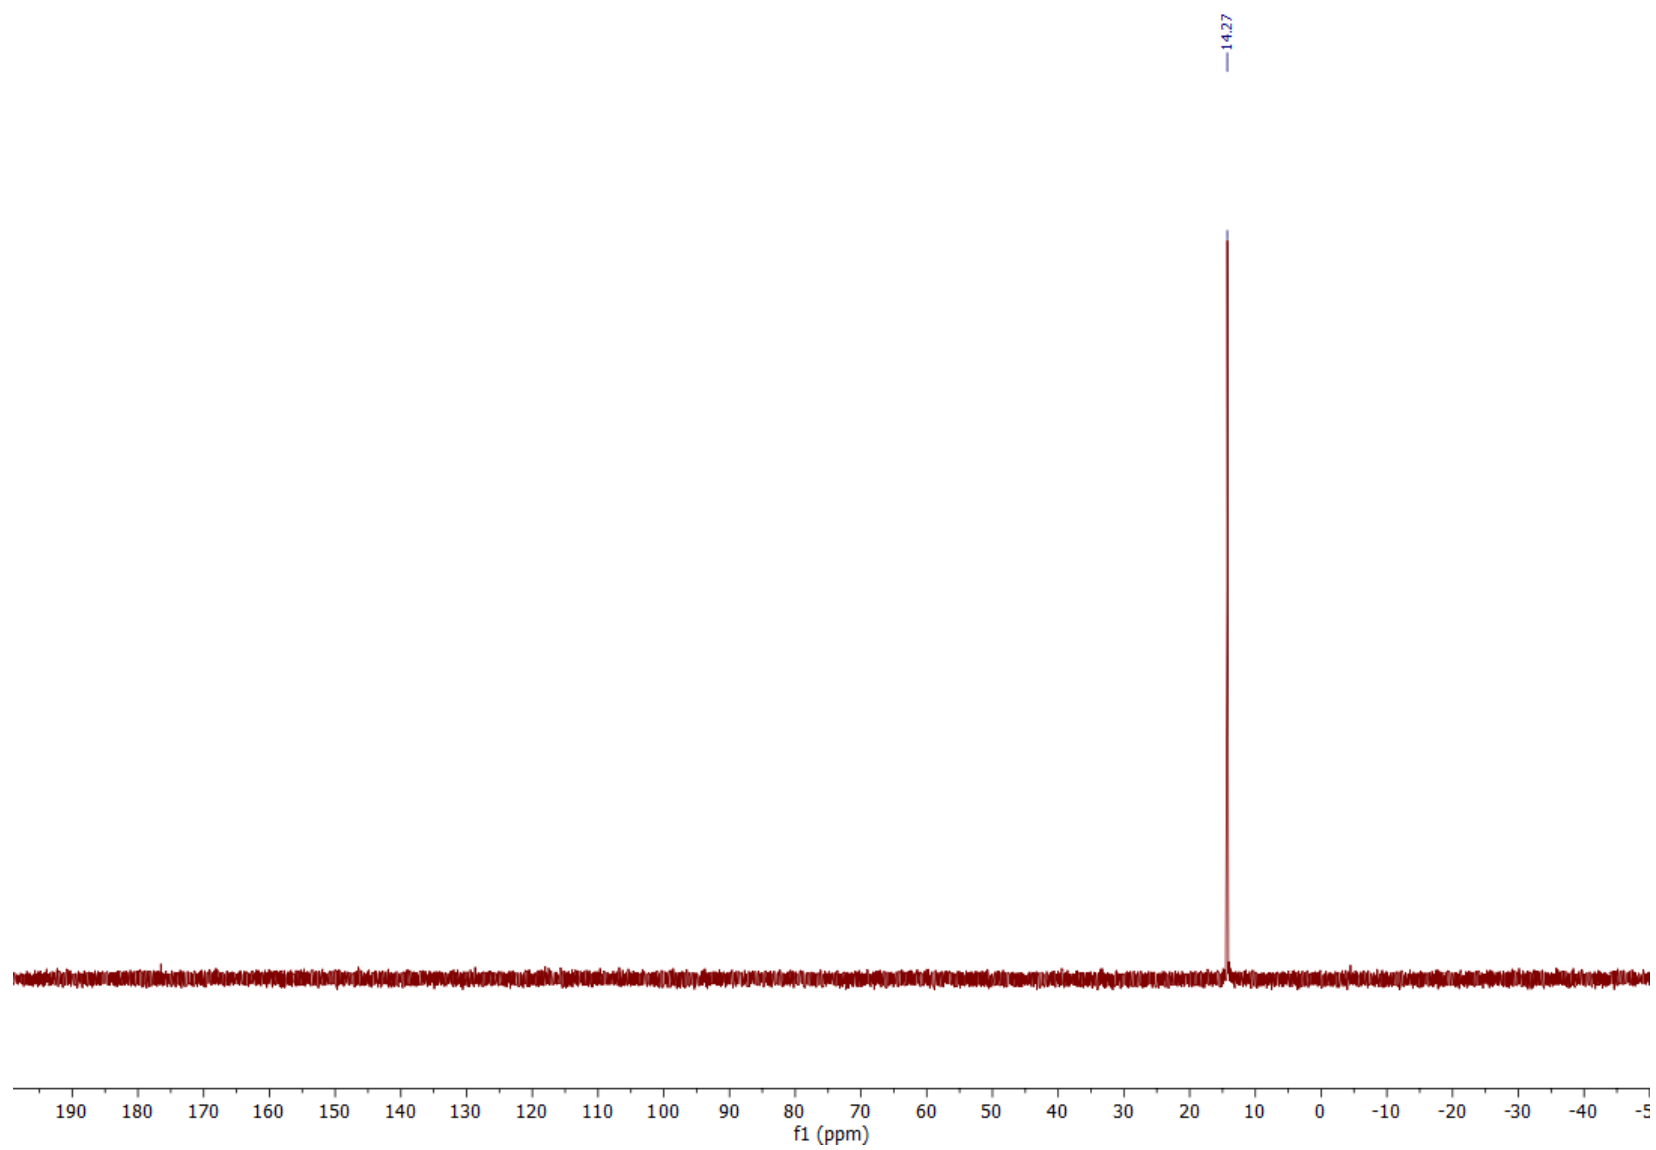

**Figure S143.**  $^{31}\text{P}$  NMR spectrum of **5k** diastereomer 1.

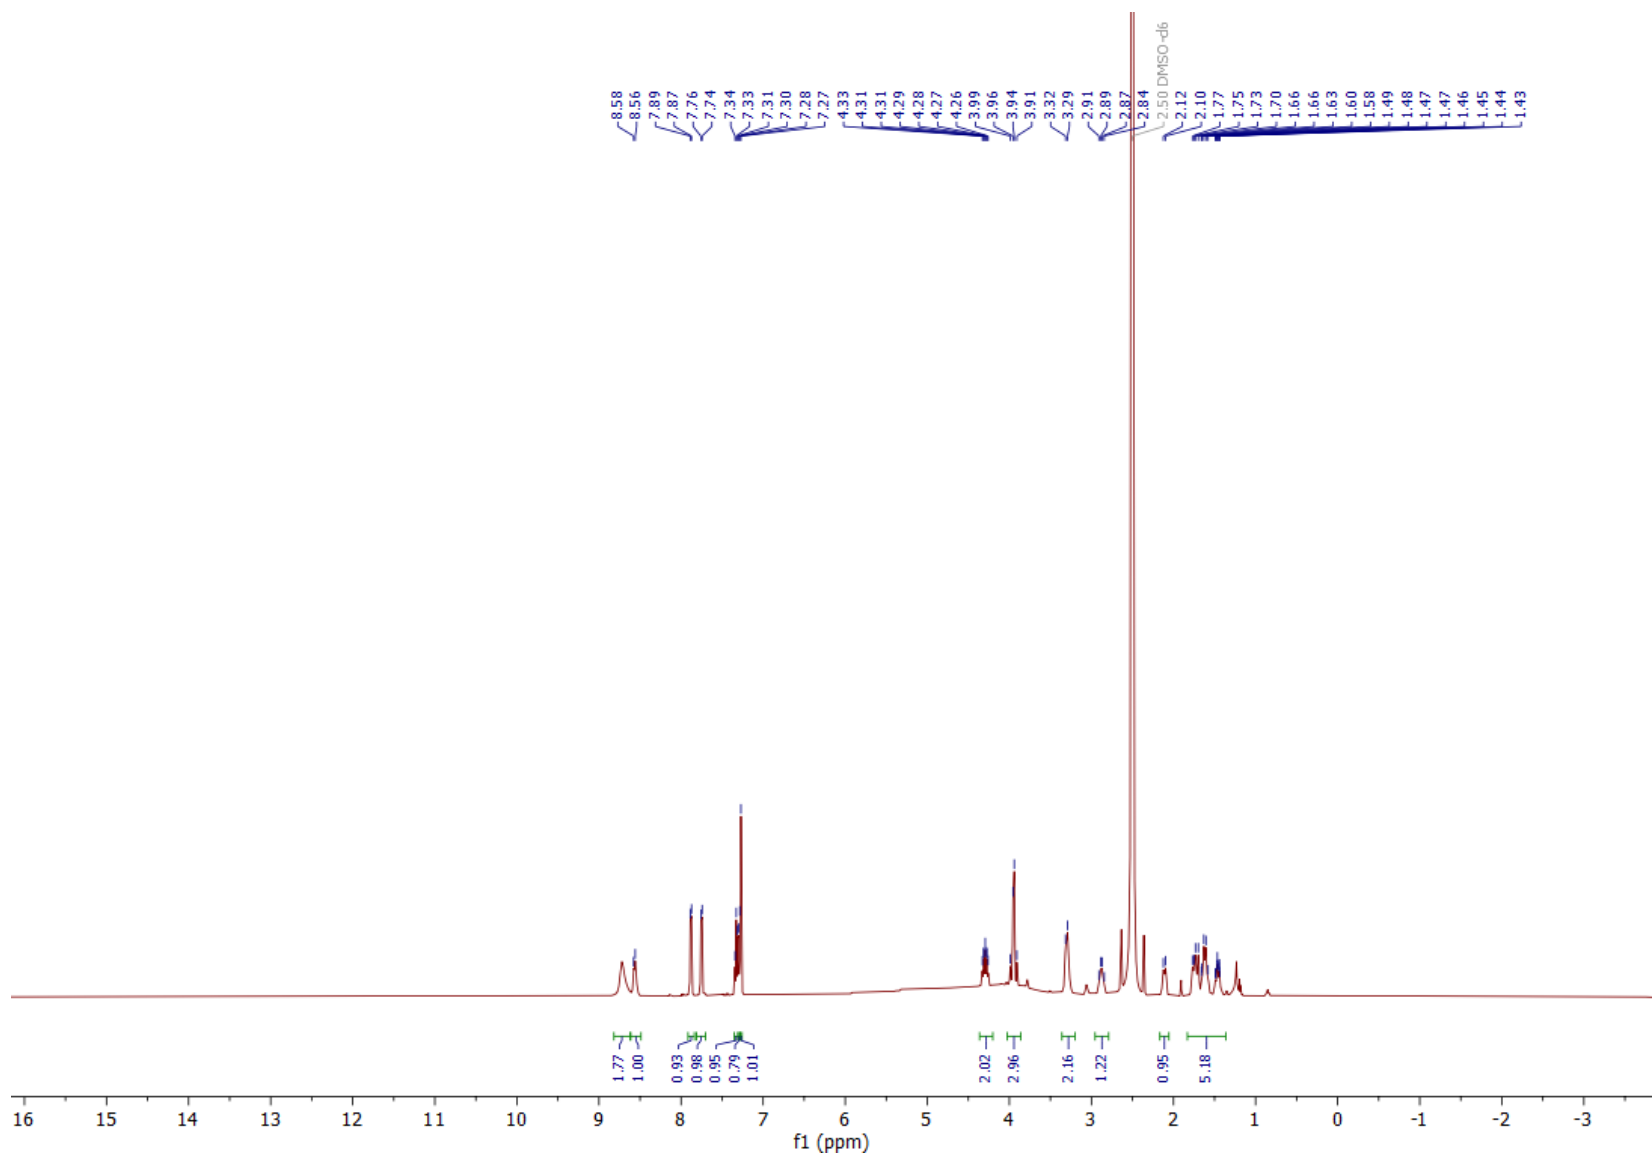

**Figure S144.**  $^1\text{H}$  NMR spectrum of **5k** diastereomer 2.

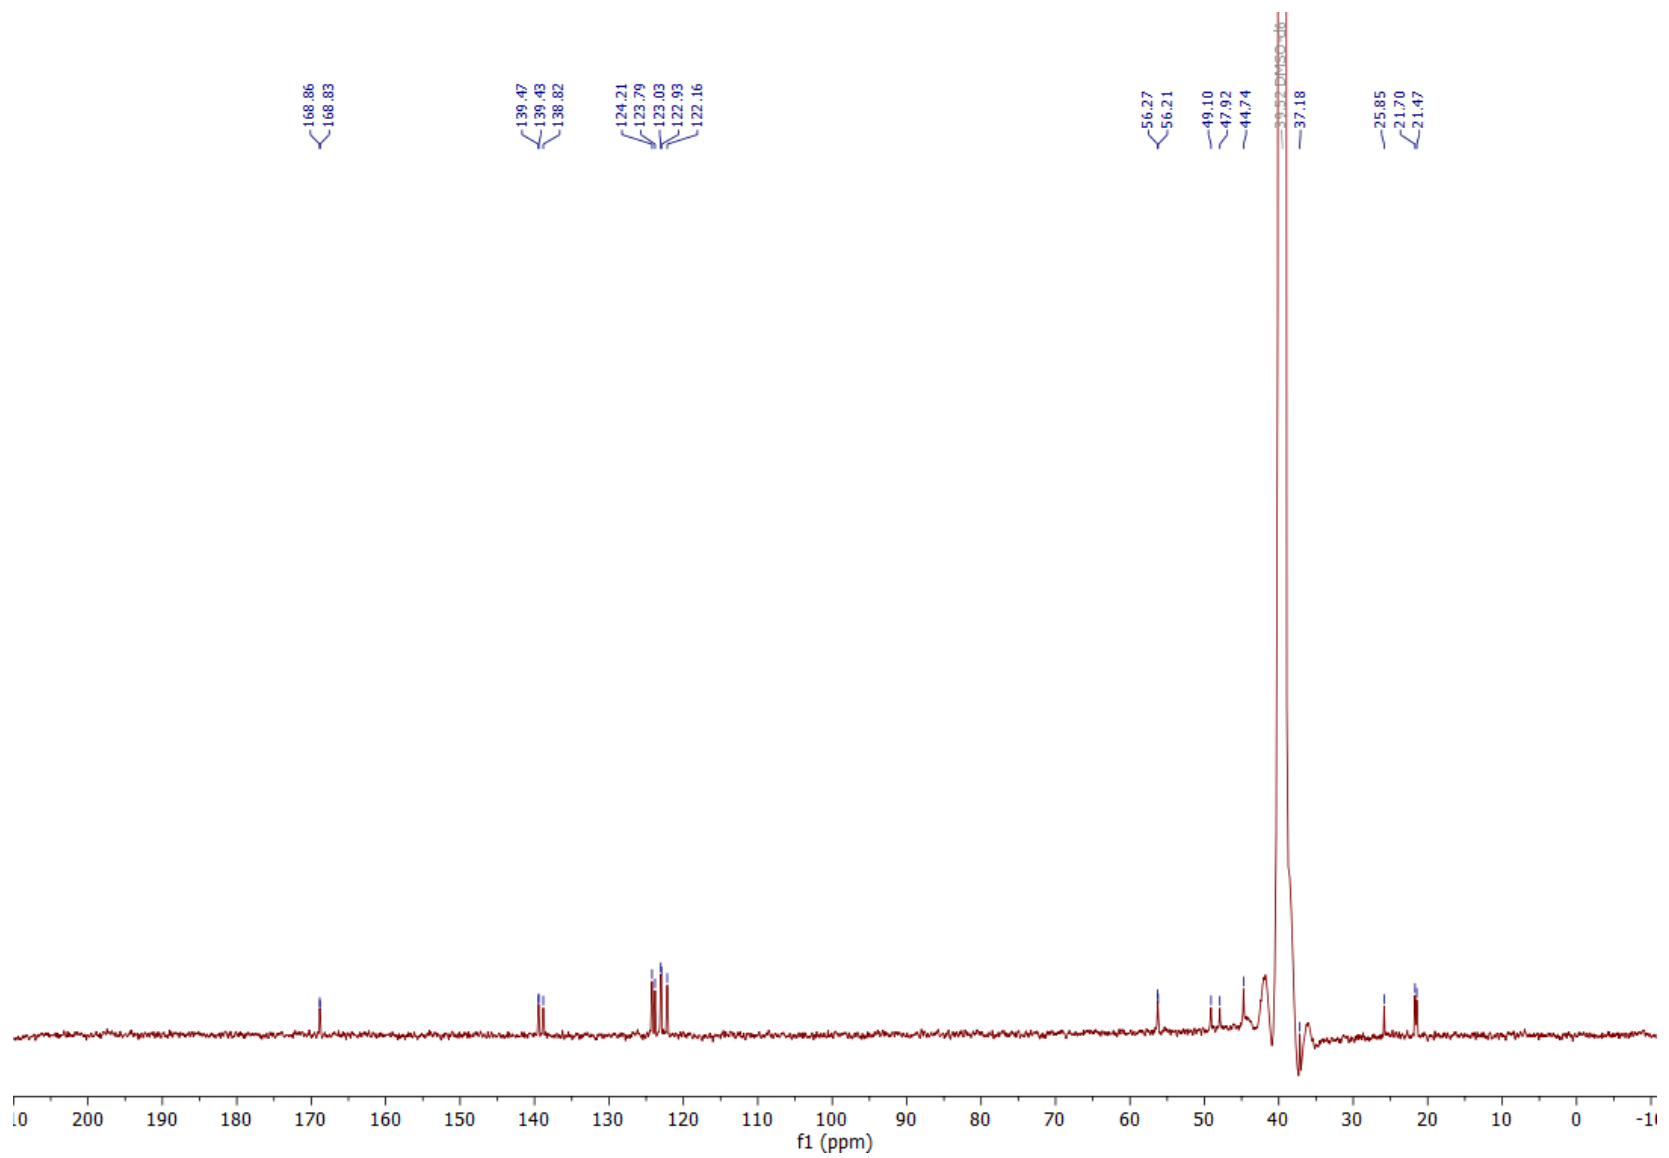

**Figure S145.** <sup>13</sup>C NMR spectrum of **5k** diastereomer 2.



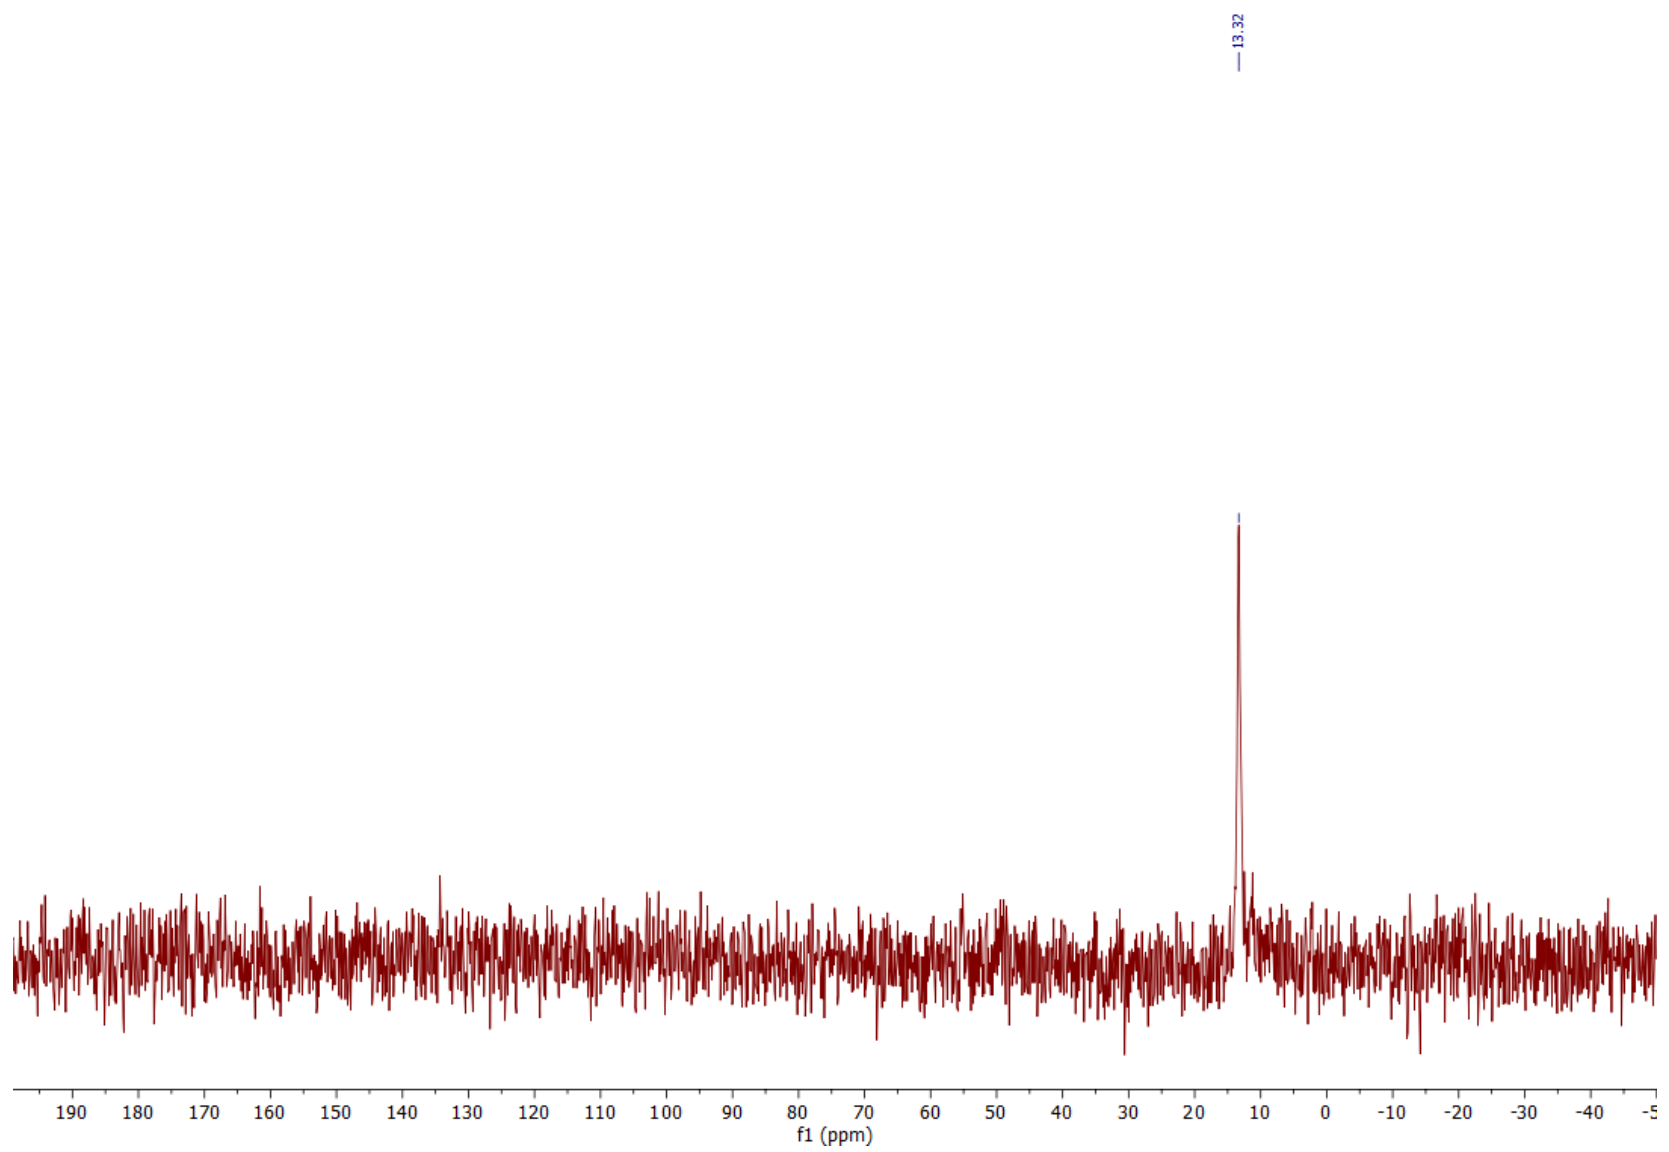

**Figure S146.**  $^{31}\text{P}$  NMR spectrum of **5k** diastereomer 2.

((2-(Benzo[b]thiophen-3-yl)acetamido)(piperidin-2-yl)methyl)phosphonic acid hydrochloride (**51**)

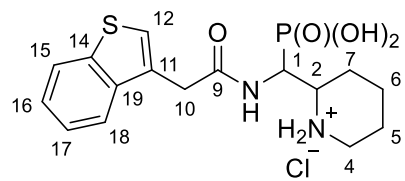

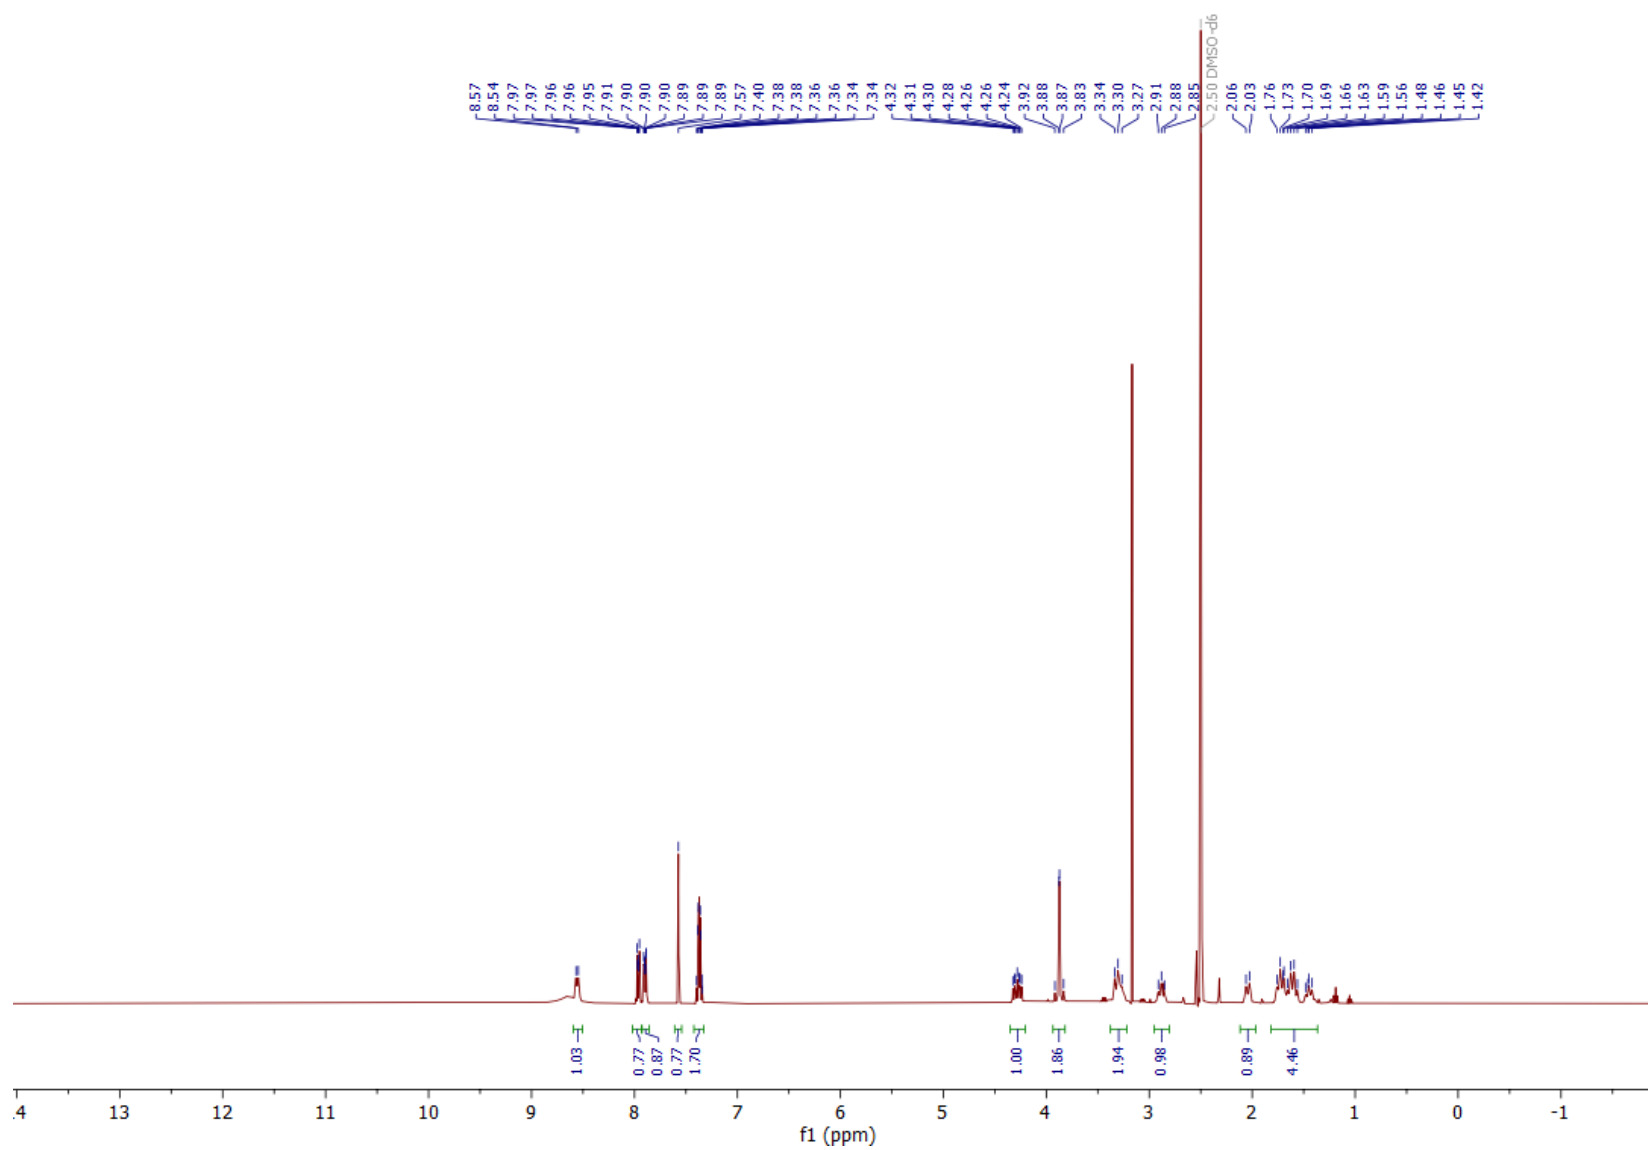

Figure S147. <sup>1</sup>H NMR spectrum of **5I** diastereomer 1.

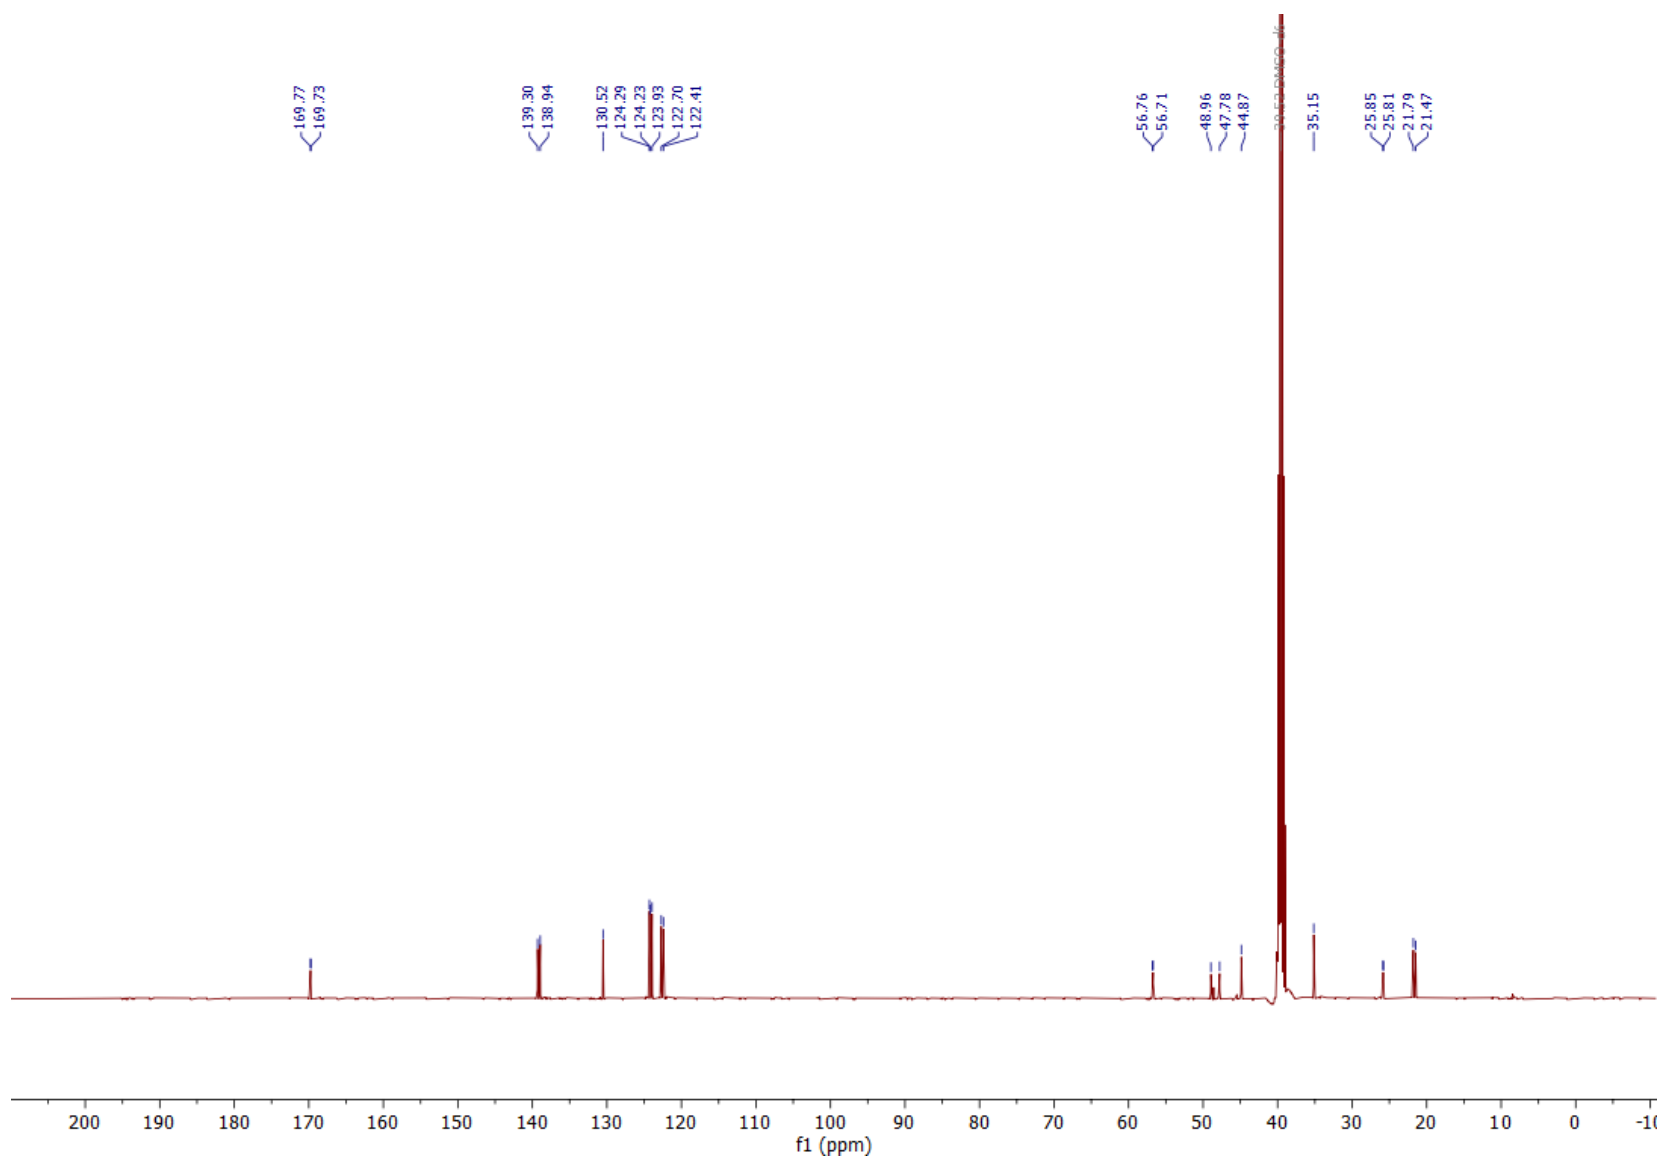

**Figure S148.** <sup>13</sup>C NMR spectrum of **51** diastereomer 1.

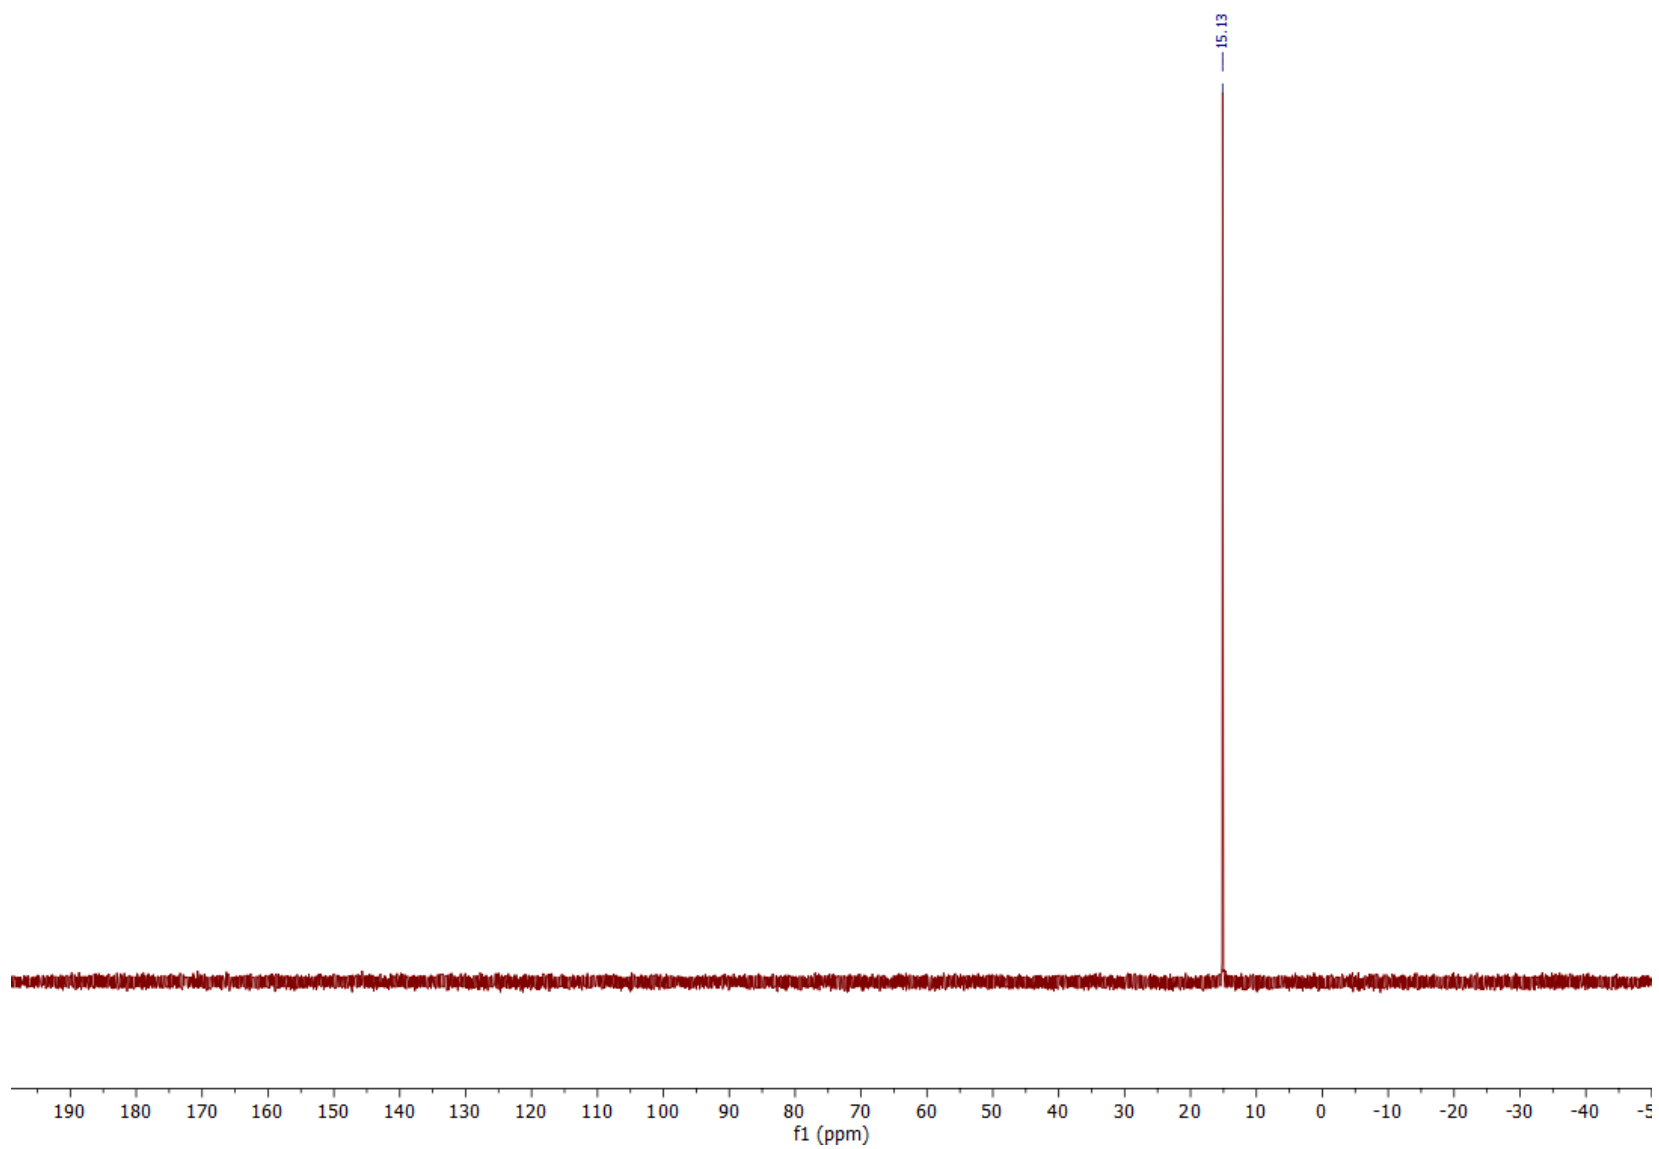

**Figure S149.**  $^{31}\text{P}$  NMR spectrum of **5I** diastereomer 1.

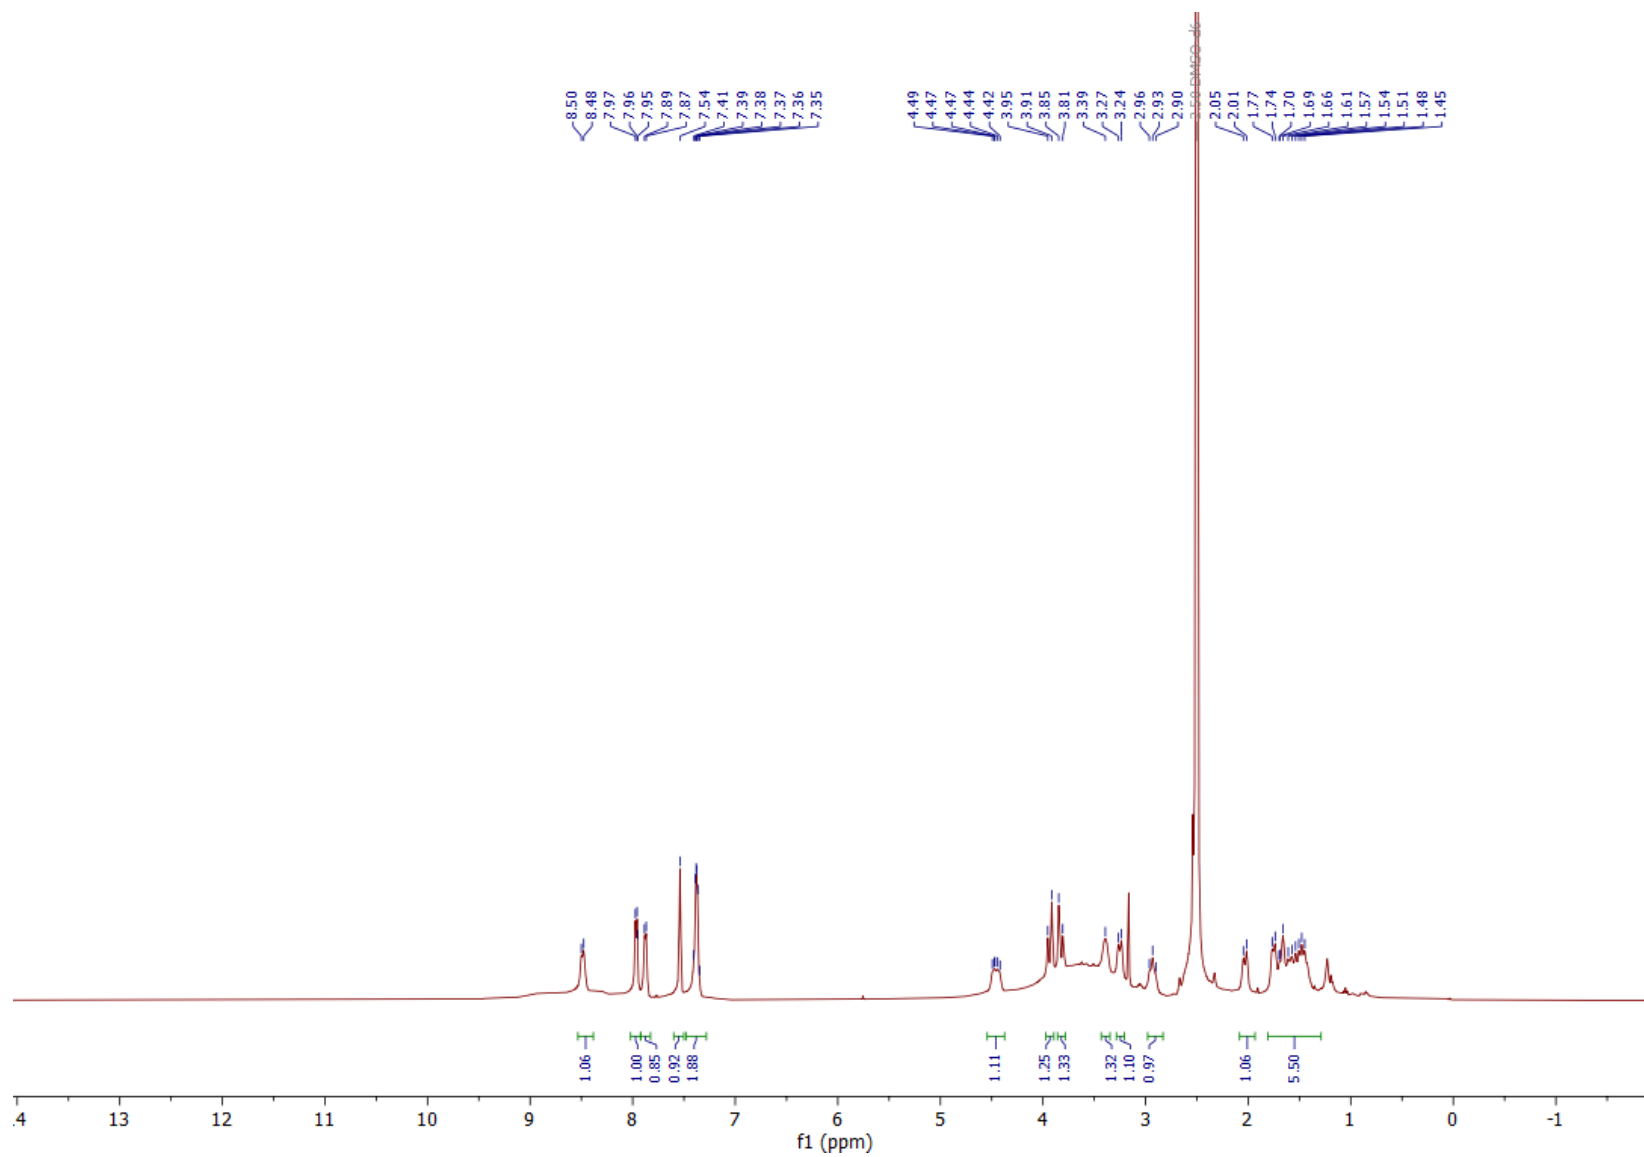

**Figure S150.**  $^1\text{H}$  NMR spectrum of **5I** diastereomer 2.

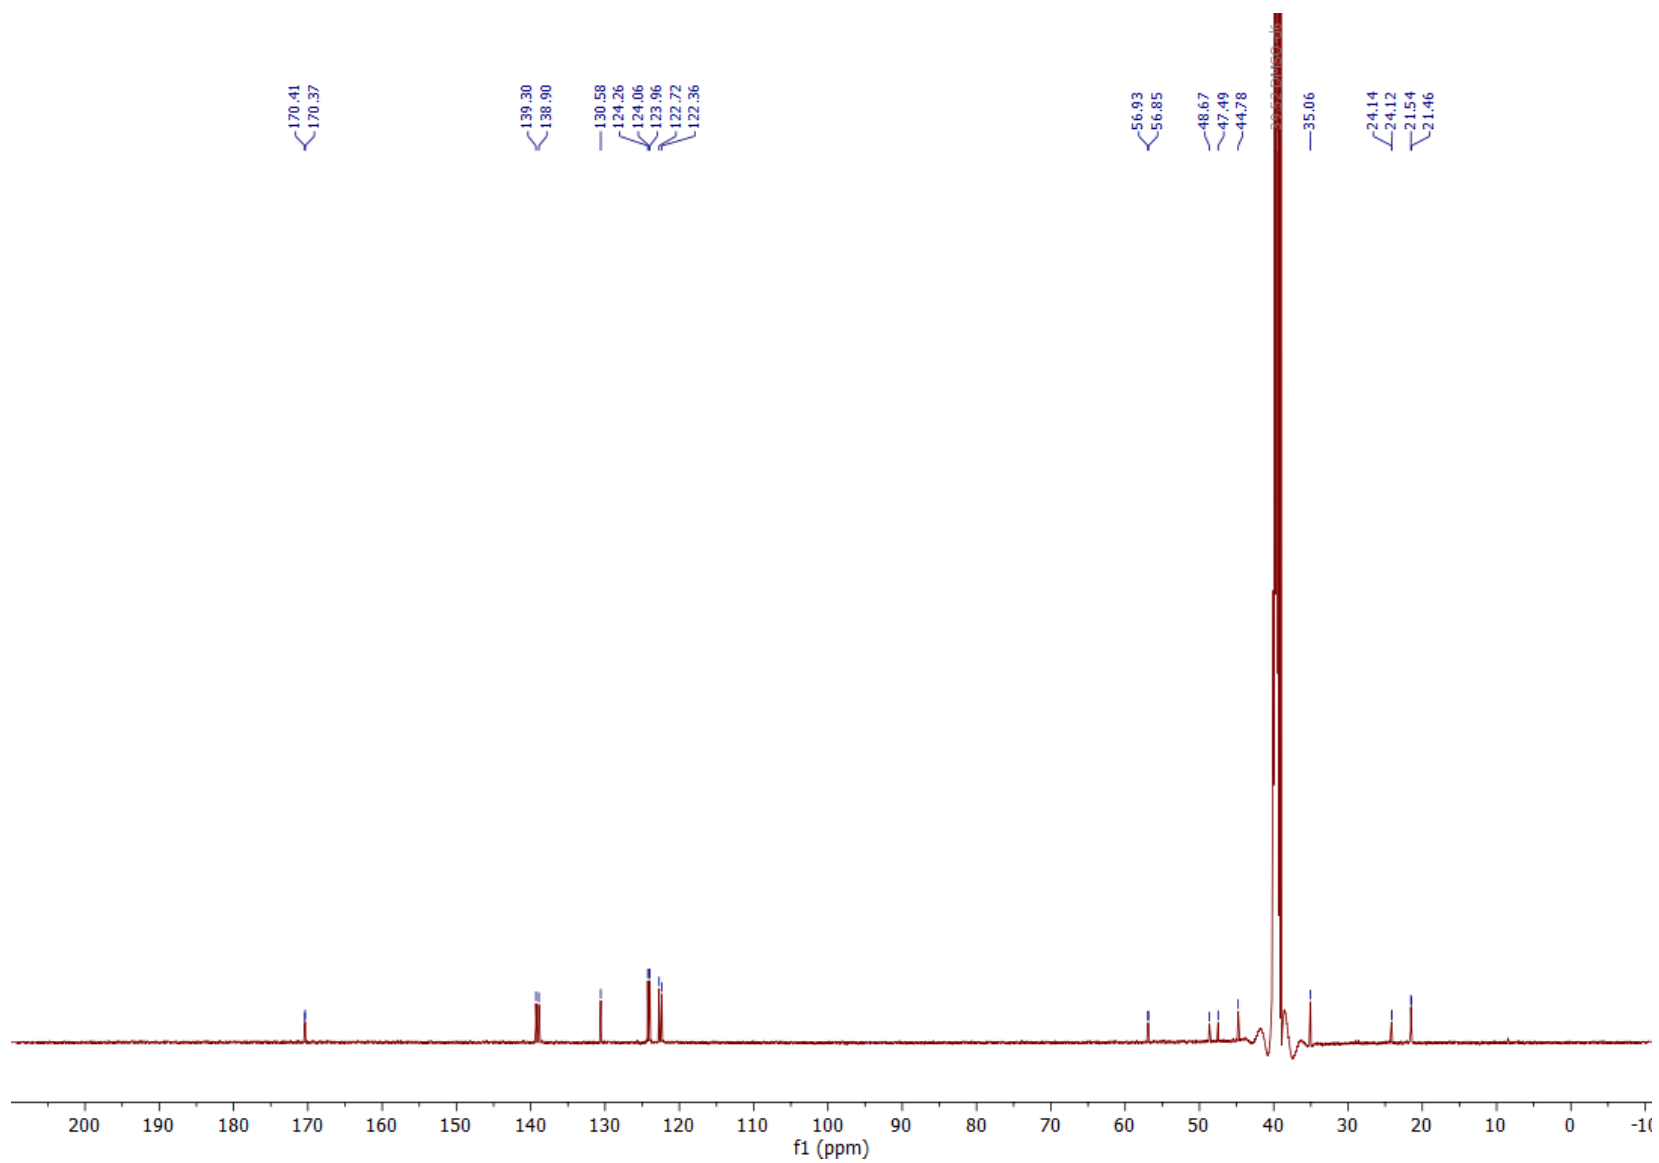

**Figure S151.** <sup>13</sup>C NMR spectrum of **51** diastereomer 2.

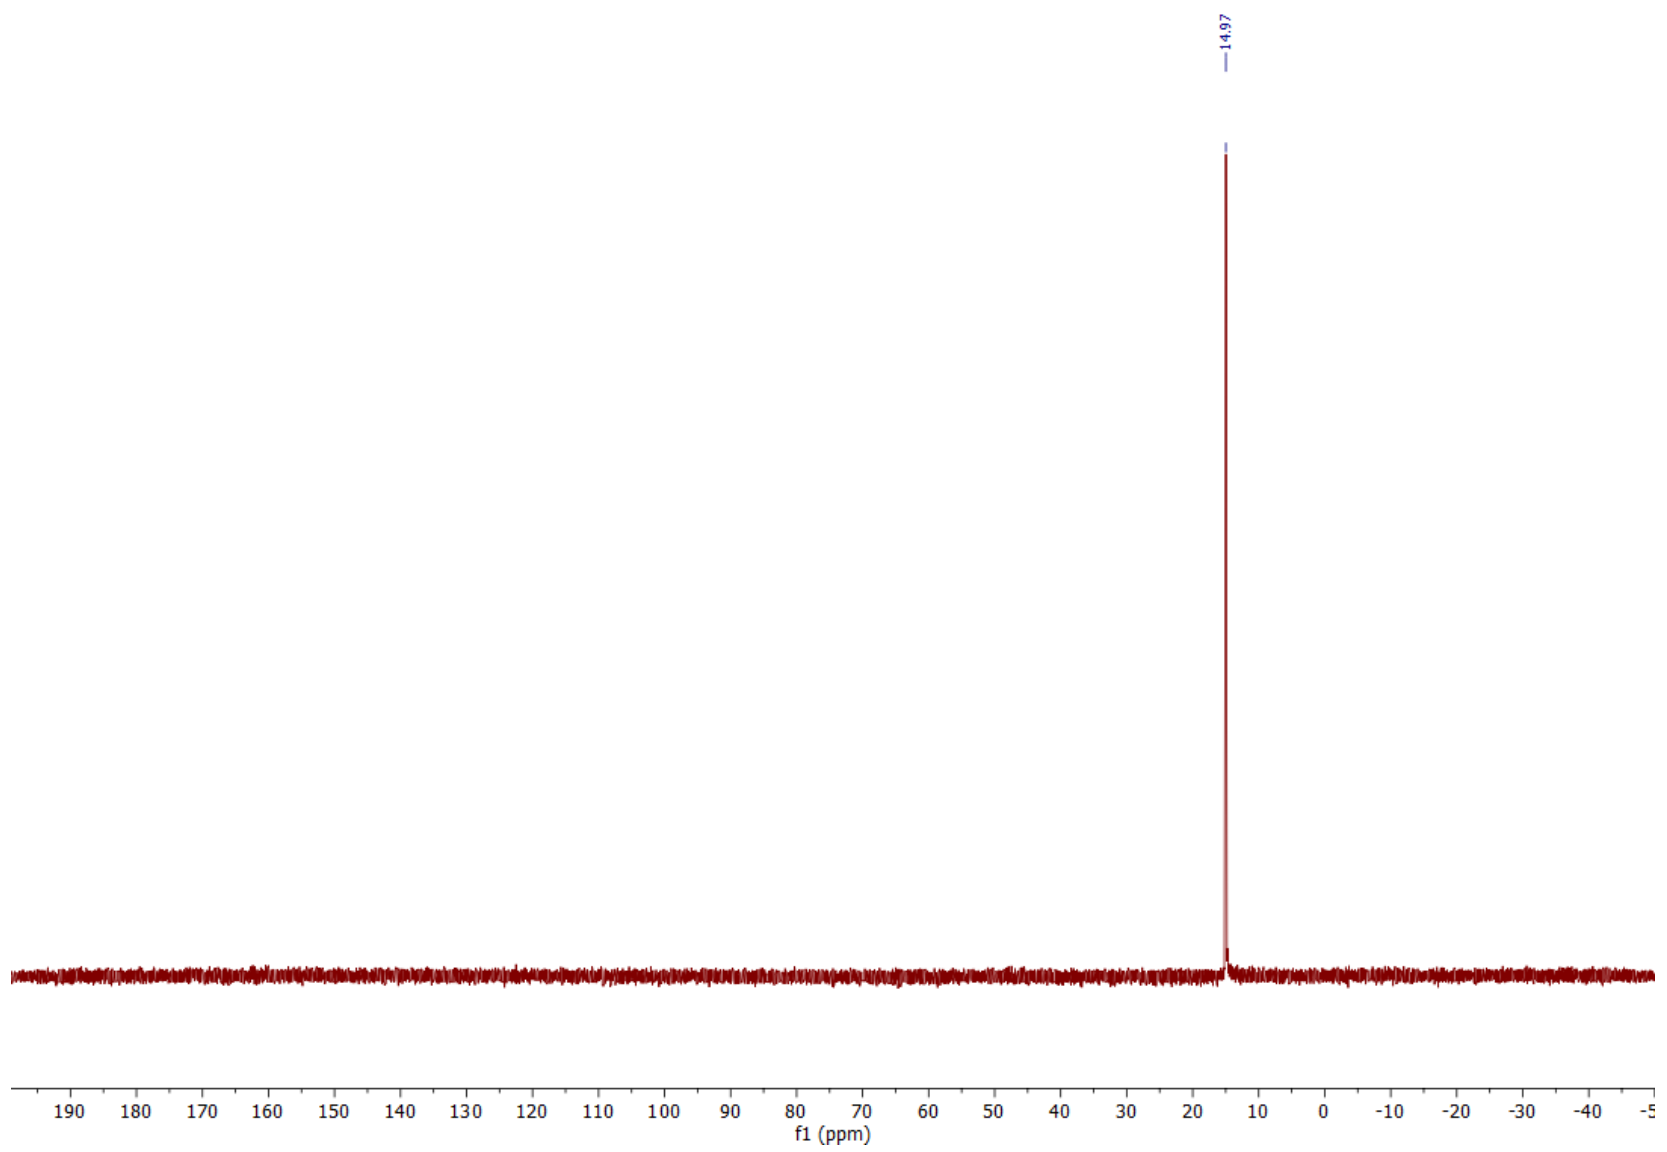

**Figure S152.**  $^{31}\text{P}$  NMR spectrum of **5I** diastereomer 2.



## 5. Crystallographic data

### 4a-2 (*R,R* / *S,S*)

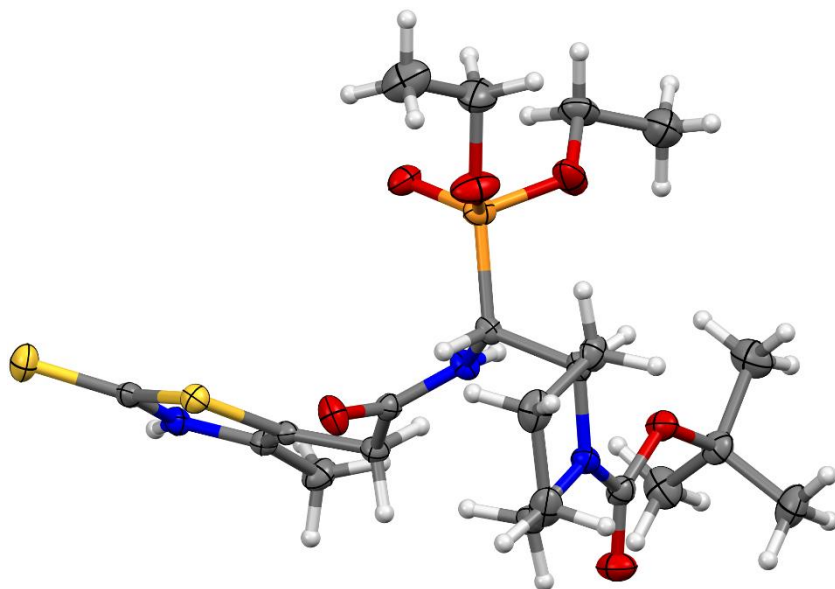

**Figure S153.** Thermal ellipsoid diagram (50% probability) of **4a-2** (*R,R* presented), CCDC 2203659.

Chemical Formula:  $C_{21}H_{36}N_3O_6PS_2$

Formula weight: 521.62

Crystal system: monoclinic

Space Group:  $P2_1/n$

Cell lengths / Å: **a** 11.8864(6) **b** 17.0353(6) **c** 13.0083(5)

Cell angles / deg:  $\alpha$  90  $\beta$  93.201(4)  $\gamma$  90

Cell Volume / Å<sup>3</sup>: 2629.92

*R* indices [ $I > 2\sigma(I)$ ]:  $R_1 = 0.0597$ ,  $wR_2 = 0.1056$

*R* indices (all data):  $R_1 = 0.0989$ ,  $wR_2 = 0.1199$

Goodness-of-fit on  $F^2$ : 1.052

*Z*, *Z'*: **Z**: 4 **Z'**: 1

T / K: 120

$D_{calc}$  / g cm<sup>-3</sup>: 1.317

Packing coefficient: 0.665897

Radiation type: micro-focus sealed X-ray tube, Mo-radiation

Habit: prism

Color: colorless

**4b-1** (*R,S* / *S,R*)

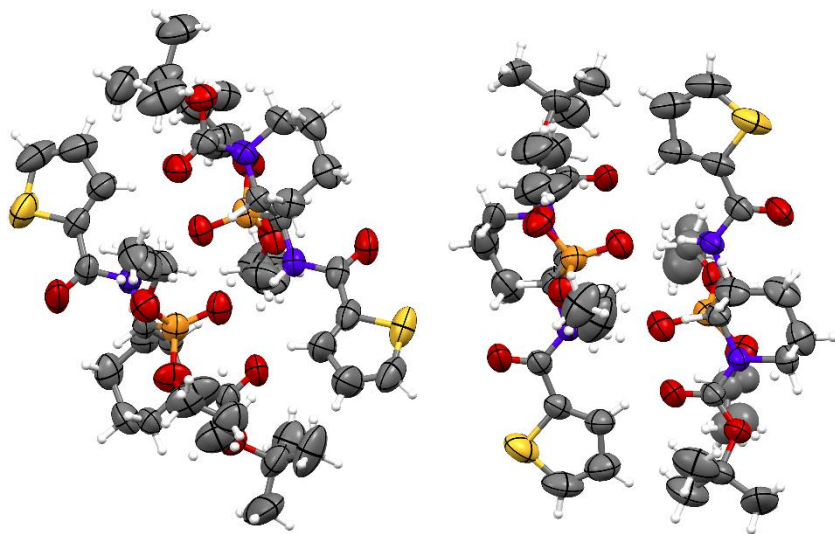

**Figure S154.** Thermal ellipsoid diagram (50% probability) of **4b-2** (asymmetric unit presented), CCDC 2203660.

Chemical Formula: C<sub>20</sub>H<sub>33</sub>N<sub>2</sub>O<sub>6</sub>PS

Formula weight: 460.51

Crystal system: triclinic

Space Group:  $P\bar{1}$

Cell lengths / Å: **a** 15.5581(5) **b** 16.4388(5) **c** 19.9240(5)

Cell angles / deg: **α** 94.181(2) **β** 98.983(2) **γ** 90.241(2)

Cell Volume / Å<sup>3</sup>: 5019.17

*R* indices [ $I > 2\sigma(I)$ ]:  $R_1 = 0.0680$ ,  $wR_2 = 0.1662$

*R* indices (all data):  $R_1 = 0.1386$ ,  $wR_2 = 0.2105$

Goodness-of-fit on  $F^2$ : 1.022

*Z*, *Z'*: **Z**: 8 **Z'**: 4

T / K: 298

*D*<sub>calc</sub> / g cm<sup>-3</sup>: 1.219

Packing coefficient: 0.644038

Radiation type: micro-focus sealed X-ray tube, Mo-radiation

Habit: block

Color: colorless

**4c-2** (*R,R* / *S,S*)

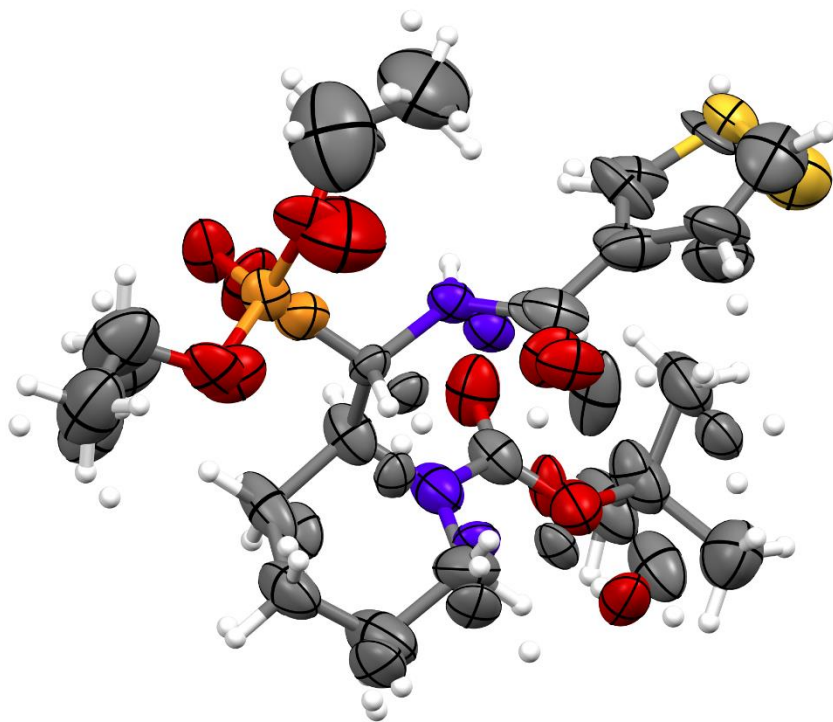

**Figure S155.** Thermal ellipsoid diagram (50% probability) of **4c-2** (*S,S* presented), CCDC 2203661.

Chemical Formula: C<sub>20</sub>H<sub>33</sub>N<sub>2</sub>O<sub>6</sub>PS

Formula weight: 460.51

Crystal system: monoclinic

Space Group: *P*2<sub>1</sub>/*n*

Cell lengths / Å: **a** 12.7772(2) **b** 13.5168(2) **c** 13.6871(2)

Cell angles / deg: **α** 90 **β** 94.1990(10) **γ** 90

Cell Volume / Å<sup>3</sup>: 2357.51

*R* indices [*I* > 2σ(*I*): *R*<sub>1</sub> = 0.0780, w*R*<sub>2</sub> = 0.2175

*R* indices (all data): *R*<sub>1</sub> = 0.0846, w*R*<sub>2</sub> = 0.2255

Goodness-of-fit on *F*<sup>2</sup>: 1.048

*Z*, *Z*': **Z**: 4 **Z**': 1

*T* / K: 120

*D*<sub>calc</sub> / g cm<sup>-3</sup>: 1.297

Packing coefficient: 0.788776

Radiation type: micro-focus sealed X-ray tube, Cu-radiation

Habit: prism

Color: colorless

**4d-2** (*R,R* / *S,S*)

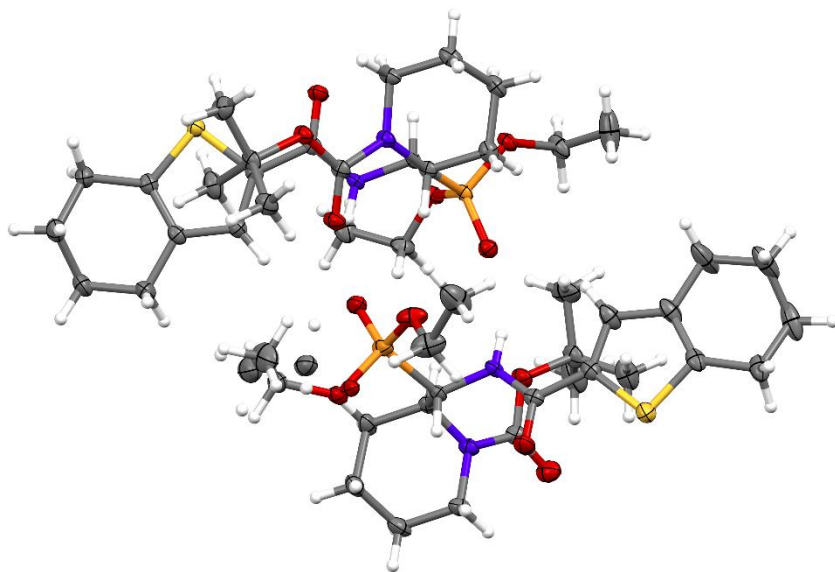

**Figure S156.** Thermal ellipsoid diagram (50% probability) of **4d-2** (asymmetric unit presented), CCDC 2203662.

Chemical Formula: C<sub>24</sub>H<sub>39</sub>N<sub>2</sub>O<sub>6</sub>PS

Formula weight: 514.60

Crystal system: monoclinic

Space Group: *P2<sub>1</sub>/c*

Cell lengths / Å: **a** 18.2265(2) **b** 14.9162(2) **c** 19.3281(2)

Cell angles / deg: **α** 90 **β** 91.2810(10) **γ** 90

Cell Volume / Å<sup>3</sup>: 5253.42

*R* indices [*I* > 2σ(*I*): *R*<sub>1</sub> = 0.0447, w*R*<sub>2</sub> = 0.1110

*R* indices (all data): *R*<sub>1</sub> = 0.0537, w*R*<sub>2</sub> = 0.1191

Goodness-of-fit on *F*<sup>2</sup>: 1.029

*Z*, *Z*': **Z**: 8 **Z**': 2

*T* / K: 120

*D*<sub>calc</sub> / g cm<sup>-3</sup>: 1.301

Packing coefficient: 0.686541

Radiation type: micro-focus sealed X-ray tube, Cu-radiation

Habit: needle

Color: colorless

**4e-2** (*R,R* / *S,S*)\*

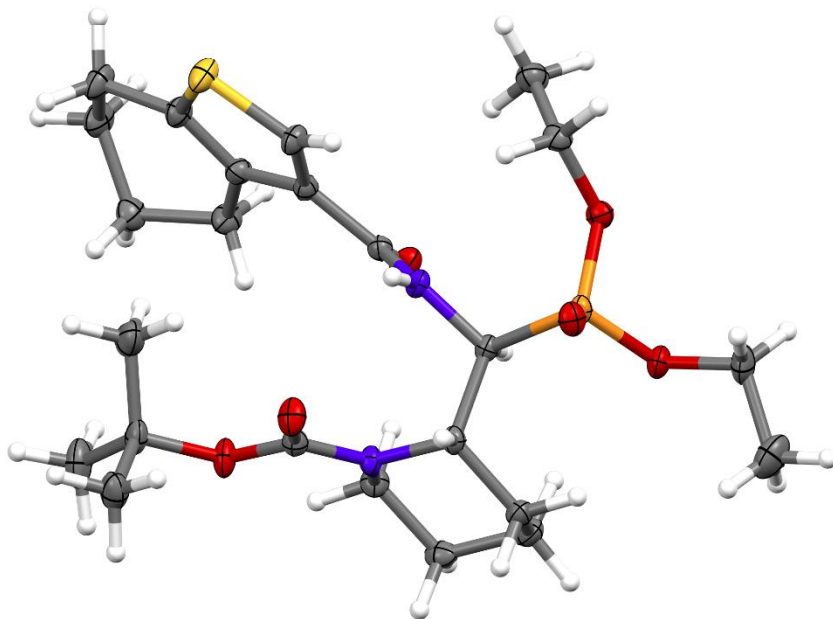

**Figure S157.** Thermal ellipsoid diagram (50% probability) of **4e-2** (*S,S* presented), CCDC 2203663.

Chemical Formula: C<sub>24</sub>H<sub>39</sub>N<sub>2</sub>O<sub>6</sub>PS

Formula weight: 514.60

Crystal system: triclinic

Space Group: *P* $\bar{1}$

Cell lengths / Å: **a** 9.9148(6) **b** 10.9400(6) **c** 14.0426(7)

Cell angles / deg:  **$\alpha$**  83.162(4)  **$\beta$**  71.761(5)  **$\gamma$**  64.421(6)

Cell Volume / Å<sup>3</sup>: 1304.63

*R* indices [*I* > 2σ(*I*): *R*<sub>1</sub> = 0.0416, w*R*<sub>2</sub> = 0.0943

*R* indices (all data): *R*<sub>1</sub> = 0.0533, w*R*<sub>2</sub> = 0.1032

Goodness-of-fit on *F*<sup>2</sup>: 1.040

*Z*, *Z*': ***Z***: 2 ***Z*'**: 1

*T* / K: 120

*D*<sub>calc</sub> / g cm<sup>-3</sup>: 1.310

Packing coefficient: 0.681854

Radiation type: micro-focus sealed X-ray tube, Mo-radiation

Habit: block

Color: colorless

\*Alternative monoclinic structure **4e-2b** was also obtained. Data is found from CSD with identifier CCDC 2203670.

**4f-1** (*R,S* / *S,R*)

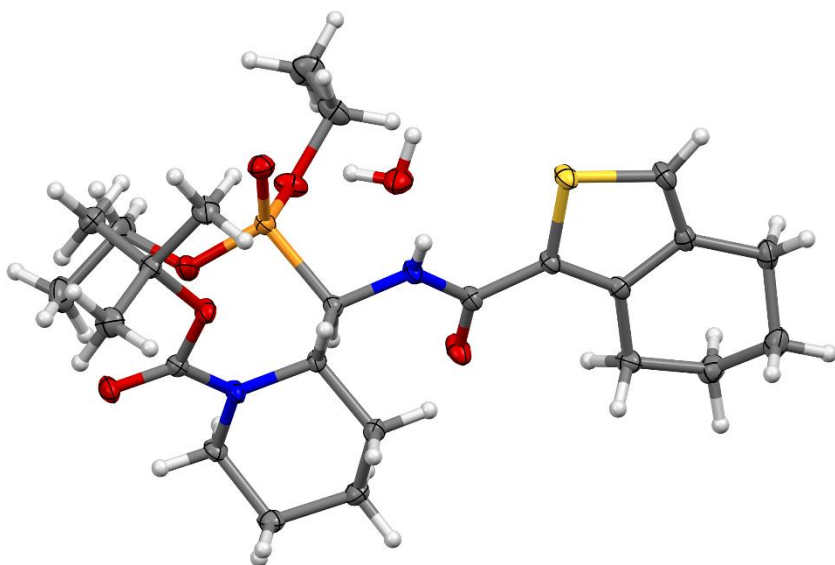

**Figure S158.** Thermal ellipsoid diagram (50% probability) of **4f-1** (*R,S* presented), CCDC 2203664.

Chemical Formula: C<sub>24</sub>H<sub>39</sub>N<sub>2</sub>O<sub>6</sub>PS, H<sub>2</sub>O

Formula weight: 532.62

Crystal system: triclinic

Space Group: *P* $\bar{1}$

Cell lengths / Å: **a** 8.9060(3) **b** 12.7308(4) **c** 13.1186(4)

Cell angles / deg:  **$\alpha$**  75.251(13)  **$\beta$**  76.379(3)  **$\gamma$**  73.533(3)

Cell Volume / Å<sup>3</sup>: 1346.58

*R* indices [*I* > 2σ(*I*): *R*<sub>1</sub> = 0.0330, w*R*<sub>2</sub> = 0.0819

*R* indices (all data): *R*<sub>1</sub> = 0.0390, w*R*<sub>2</sub> = 0.0860

Goodness-of-fit on *F*<sup>2</sup>: 1.024

*Z*, *Z*': ***Z***: 2 ***Z*'**: 1

*T* / K: 120

*D*<sub>calc</sub> / g cm<sup>-3</sup>: 1.314

Packing coefficient: 0.688268

Radiation type: micro-focus sealed X-ray tube, Mo-radiation

Habit: block

Color: colorless

**4g-1** (*R,S* / *S,R*)

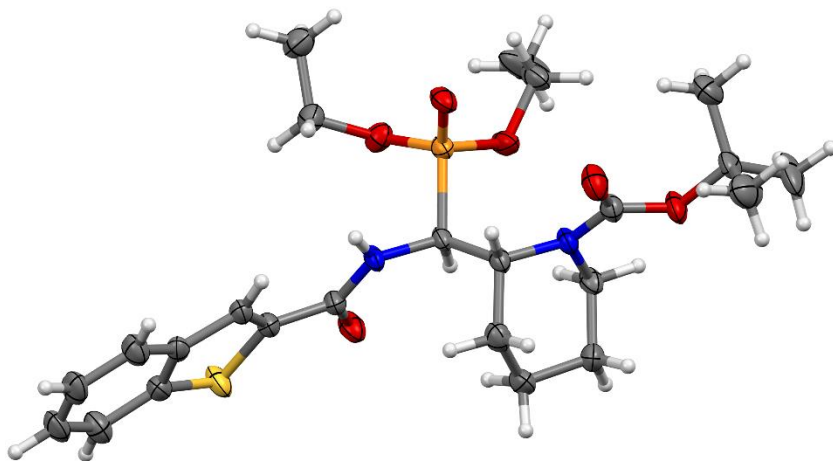

**Figure S159.** Thermal ellipsoid diagram (50% probability) of **4g-1** (*S,R* presented), CCDC 2203665.

Chemical Formula: C<sub>24</sub>H<sub>35</sub>N<sub>2</sub>O<sub>6</sub>PS

Formula weight: 510.57

Crystal system: monoclinic

Space Group: *P2<sub>1</sub>/n*

Cell lengths / Å: **a** 10.2580(5) **b** 17.1642(5) **c** 14.6705(4)

Cell angles / deg: **α** 90 **β** 90.482(3) **γ** 90

Cell Volume / Å<sup>3</sup>: 2582.95(16)

*R* indices [*I* > 2σ(*I*): *R*<sub>1</sub> = 0.0782, w*R*<sub>2</sub> = 0.2331

*R* indices (all data): *R*<sub>1</sub> = 0.1065, w*R*<sub>2</sub> = 0.2910

Goodness-of-fit on *F*<sup>2</sup>: 1.107

*Z*, *Z*': **Z**: 4 **Z**': 1

*T* / K: 120

*D*<sub>calc</sub> / g cm<sup>-3</sup>: 1.313

Packing coefficient: 0.679441

Radiation type: micro-focus sealed X-ray tube, Mo-radiation

Habit: prism

Color: colorless

**4h-2** (*R,R* / *S,S*)

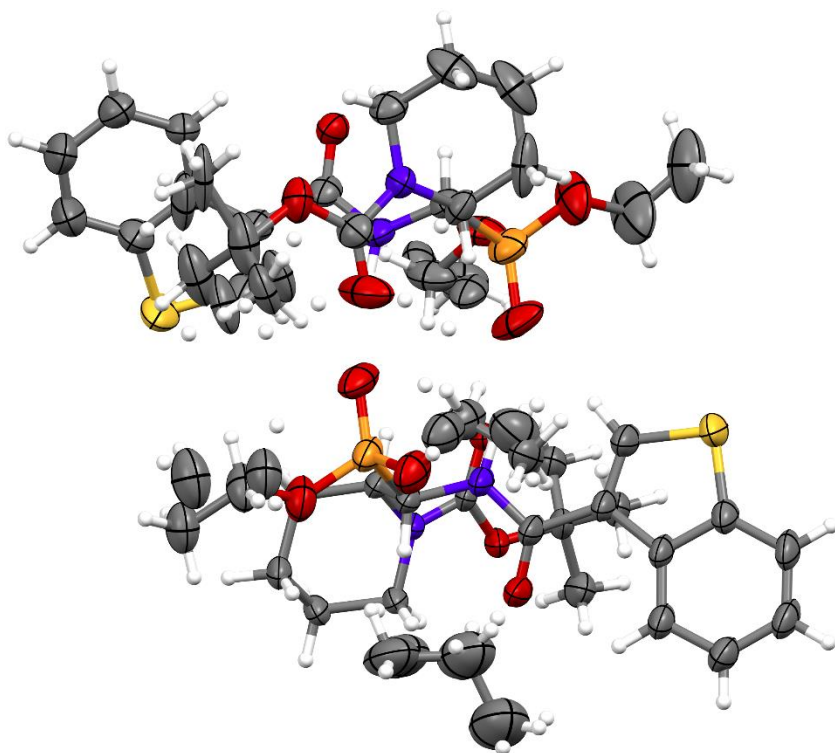

**Figure S160.** Thermal ellipsoid diagram (50% probability) of **4h-2** (asymmetric unit presented), CCDC 2203666.

Chemical Formula:  $2(\text{C}_{24}\text{H}_{35}\text{N}_2\text{O}_6\text{PS})$ ,  $0.5\text{C}_6\text{H}_{12}$

Formula weight: 1063.21

Crystal system: monoclinic

Space Group: *C2/c*

Cell lengths / Å: **a** 48.4808(11) **b** 12.1659(6) **c** 18.9571(5)

Cell angles / deg: **α** 90 **β** 96.648(2) **γ** 90

Cell Volume / Å<sup>3</sup>: 11106

*R* indices [*I* > 2σ(*I*): *R*<sub>1</sub> = 0.0687, w*R*<sub>2</sub> = 0.1777

*R* indices (all data): *R*<sub>1</sub> = 0.1001, w*R*<sub>2</sub> = 0.2005

Goodness-of-fit on *F*<sup>2</sup>: 1.031

*Z*, *Z*': **Z**: 8 **Z**': 1

*T* / K: 120

*D*<sub>calc</sub> / g cm<sup>-3</sup>: 1.272

Packing coefficient: 0.696741

Radiation type: micro-focus sealed X-ray tube, Mo-radiation

Habit: prism

Color: colorless



**4i-1** (*S,R* / *R,S*)

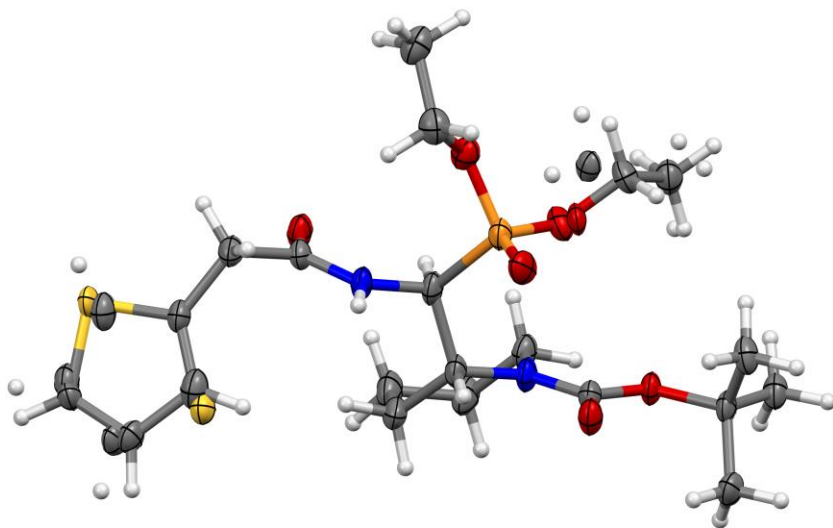

**Figure S161.** Thermal ellipsoid diagram (50% probability) of **4i-1** (asymmetric unit presented), CCDC 2209101.

Chemical Formula: C<sub>21</sub>H<sub>35</sub>N<sub>2</sub>O<sub>6</sub>PS

Formula weight: 474.55

Crystal system: triclinic

Space Group: *P* $\bar{1}$

Cell lengths / Å: **a** 9.2861(6) **b** 11.2061(9) **c** 12.3620(6)

Cell angles / deg:  **$\alpha$**  103.022(5)  **$\beta$**  100.213(5)  **$\gamma$**  102.017(6)

Cell Volume / Å<sup>3</sup>: 1191.44

*R* indices [*I* > 2σ(*I*): *R*<sub>1</sub> = 0.0702, w*R*<sub>2</sub> = 0.1820

*R* indices (all data): *R*<sub>1</sub> = 0.0915, w*R*<sub>2</sub> = 0.2123

Goodness-of-fit on *F*<sup>2</sup>: 1.050

*Z*, *Z*': ***Z***: 2 ***Z*'**: 1

*T* / K: 120

*D*<sub>calc</sub> / g cm<sup>-3</sup>: 1.323

Packing coefficient: 0.715794

Radiation type: micro-focus sealed X-ray tube, Mo-radiation

Habit: stacked plate

Color: colorless

**4j-1** (*R,S* / *S,R*)

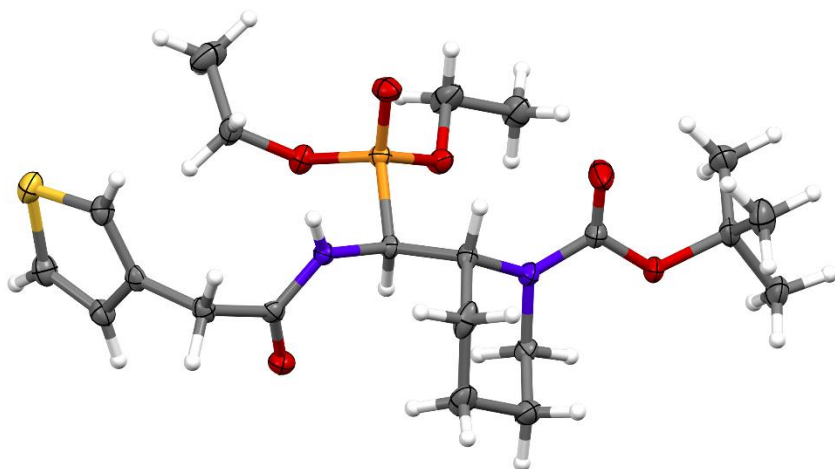

**Figure S162.** Thermal ellipsoid diagram (50% probability) of **4j-1** (*S,R* presented), CCDC 2203667.

Chemical Formula: C<sub>21</sub>H<sub>35</sub>N<sub>2</sub>O<sub>6</sub>PS

Formula weight: 474.54

Crystal system: triclinic

Space Group: *P* $\bar{1}$

Cell lengths / Å: **a** 8.8287(4) **b** 10.6334(6) **c** 14.2157(7)

Cell angles / deg:  **$\alpha$**  109.022(5)  **$\beta$**  90.103(4)  **$\gamma$**  99.548(4)

Cell Volume / Å<sup>3</sup>: 1241.97

*R* indices [*I* > 2 $\sigma$ (*I*): *R*<sub>1</sub> = 0.0431, w*R*<sub>2</sub> = 0.0934

*R* indices (all data): *R*<sub>1</sub> = 0.0603, w*R*<sub>2</sub> = 0.1023

Goodness-of-fit on *F*<sup>2</sup>: 1.024

*Z*, *Z*': ***Z***: 2 ***Z*'**: 1

*T* / K: 120

*D*<sub>calc</sub> / g cm<sup>-3</sup>: 1.269

Packing coefficient: 0.660928

Radiation type: micro-focus sealed X-ray tube, Mo-radiation

Habit: prism

Color: colorless

**4k-1** (*R,S* / *S,R*)

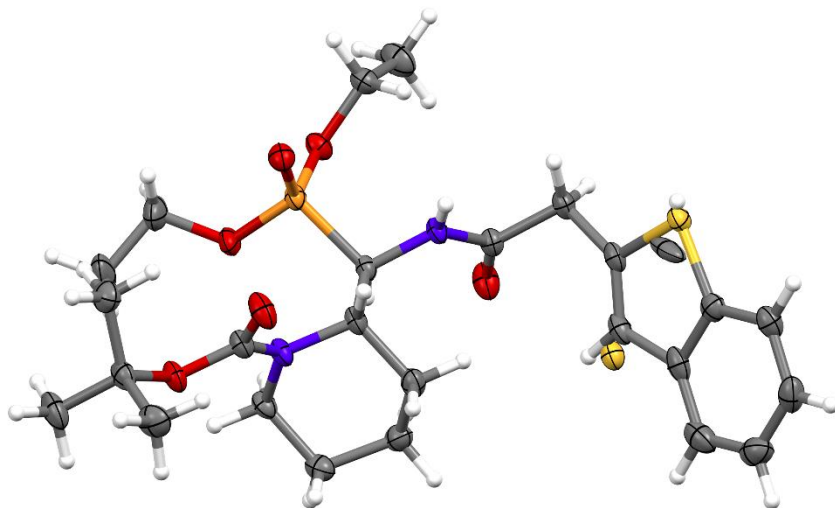

**Figure S163.** Thermal ellipsoid diagram (50% probability) of **4k-1** (*R,S* presented), CCDC 2203668.

Chemical Formula: C<sub>25</sub>H<sub>37</sub>N<sub>2</sub>O<sub>6</sub>PS

Formula weight: 524.59

Crystal system: triclinic

Space Group: *P* $\bar{1}$

Cell lengths / Å: **a** 9.0460(3) **b** 10.9706(4) **c** 13.8583(3)

Cell angles / deg:  **$\alpha$**  86.282(2)  **$\beta$**  87.202(2)  **$\gamma$**  79.542(3)

Cell Volume / Å<sup>3</sup>: 1348.64

*R* indices [*I* > 2 $\sigma$ (*I*): *R*<sub>1</sub> = 0.0417, w*R*<sub>2</sub> = 0.1033

*R* indices (all data): *R*<sub>1</sub> = 0.0519, w*R*<sub>2</sub> = 0.1105

Goodness-of-fit on *F*<sup>2</sup>: **Z**, **Z'**: **Z**: 2 **Z'**: 1

T / K: 120

D<sub>calc</sub> / g cm<sup>-3</sup>: 1.292

Packing coefficient: 0.675088

Radiation type: micro-focus sealed X-ray tube, Mo-radiation

Habit: block

Color: colorless

**41-1** (*R,S* / *S,R*)

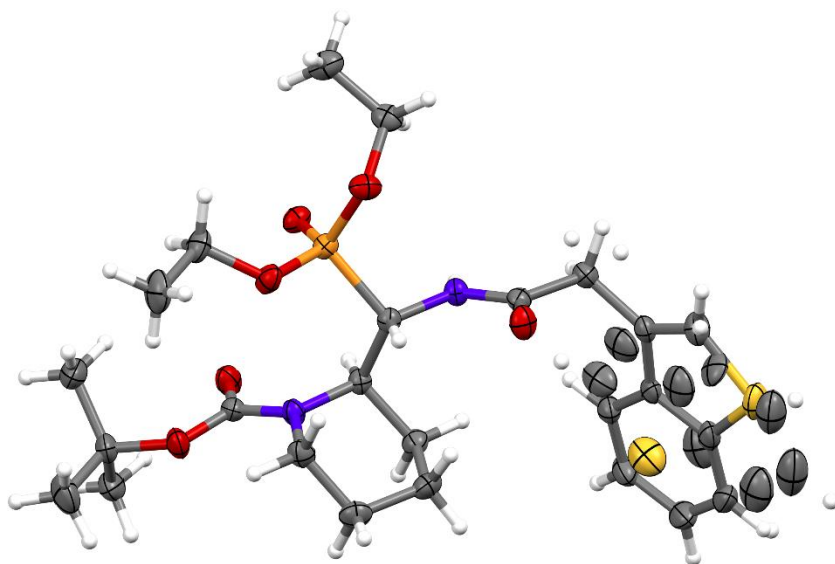

**Figure S164.** Thermal ellipsoid diagram (50% probability) of **41-1** (*S,R* presented), CCDC 2203669.

Chemical Formula: C<sub>25</sub>H<sub>37</sub>N<sub>2</sub>O<sub>6</sub>PS

Formula weight: 524.59

Crystal system: monoclinic

Space Group: *P2*<sub>1</sub>/*c*

Cell lengths / Å: **a** 9.3831(3) **b** 26.8231(6) **c** 11.5306(3)

Cell angles / deg: **α** 90 **β** 107.972(3) **γ** 90

Cell Volume / Å<sup>3</sup>: 2760.47

*R* indices [*I* > 2σ(*I*): *R*<sub>1</sub> = 0.0464, w*R*<sub>2</sub> = 0.1011

*R* indices (all data): *R*<sub>1</sub> = 0.0632, w*R*<sub>2</sub> = 0.1110

Goodness-of-fit on *F*<sup>2</sup>: 1.061

*Z*, *Z*': **Z**: 4 **Z**': 1

*T* / K: 120

*D*<sub>calc</sub> / g cm<sup>-3</sup>: 1.262

Packing coefficient: 0.691595

Radiation type: micro-focus sealed X-ray tube, Mo-radiation

Habit: prism

Color: colorless

## 6. Chemical shift perturbation (CSP) throughout the titration of NDM-1 and of VIM-2 with inhibitors

**Table S3.** Chemical shift changes for the titrated inhibitors with NDM-1

| <b>AA NDM-1</b> | <b>5i-2</b> | <b>5i-1</b> | <b>5b-1</b>    | <b>5c-1</b>    | <b>5j-1</b> |
|-----------------|-------------|-------------|----------------|----------------|-------------|
| 039M_113V       | 0,00328     | 0,00147     | 0,00691        | 0,00127        | 0,00116     |
| 042G            | 0,01175     | 0,01218     | <b>0,03491</b> | <b>0,02388</b> | 0,01481     |
| 043D            | 0,00106     | 0,00183     | 2,02724E-4     | 0,00273        | 0,00299     |
| 044Q            | 0,00296     | 6,99625E-4  | 0,00729        | 0,00129        | 0,00101     |
| 045R_099A       | 0,01151     | 0,00688     | 0,00895        | 0,00605        | 0,00342     |
| 046F            | 0,00398     | 0,00177     | 0,00691        | 0,0033         | 4,05921E-4  |
| 047G_084G       | 0,01881     | 0,00816     | 0,02125        | 0,00624        | 0,01625     |
| 048D            | 0,00434     | 0,00284     | 0,01143        | 0,0041         | 0,00858     |
| 049L            | 0,01065     | 0,00708     | 0,00753        | 0,00171        | 0,0086      |
| 050V            | 0,0113      | 0,0152      | 0,01529        | 0,0087         | 0,00998     |
| 051F            | 0,00411     | 0,00422     | 0,0085         | 0,00383        | 0,00817     |
| 052R            | 0,01034     | 0,00432     | 0,00282        | 0,00385        | 0,00813     |
| 053Q            | 0,00752     | 0,00664     | 2,49956E-4     | 0,00397        | 0,00456     |
| 054L_183F       | 0,00719     | 0,00877     | 9,81603E-4     | 0,00113        | 0,00651     |

|           |                |                |                |                |                |
|-----------|----------------|----------------|----------------|----------------|----------------|
| 055A      | 0,01371        | 8,41347E-5     | 0,00744        | 0,00801        | 0,00691        |
| 057N      | 0,0016         | 0,00503        | 0,00692        | 0,00593        | 0,00275        |
| 058V      | 0,00583        | 9,63014E-5     | 0,0016         | 0,00118        | 0,00687        |
| 059W      | 0,00689        | 0,00165        | 4,35102E-4     | 0,00148        | 0,00328        |
| 060Q      | 0,00297        | 0,00388        | 0,00277        | 0,00284        | 0,00569        |
| 061H      | 0,00715        | 0,00326        | 1,8125E-4      | 0,00305        | 0,00206        |
| 062T_158Q | 0,00318        | 0,01713        | 0,00306        | 0,00562        | 0,00633        |
| 063S      | 0,0028         | 0,00147        | 0,01107        | 0,00676        | 0,0079         |
| 064Y      | 0,00543        | 0,00204        | 0,0015         | 0,00157        | 0,00194        |
| 065L      | 0,01085        | 0,00947        | 0,0062         | 0,00687        | 0,01444        |
| 066D      | 0,0038         | 0,0034         | 0,003          | 0,00159        | 0,00136        |
| 067M_245M | 0,00388        | 0,00178        | 0,00198        | 0,00115        | 2,14963E-4     |
| 070F      | <b>0,02197</b> | <b>0,02939</b> | <b>0,03529</b> | <b>0,02712</b> | <b>0,04048</b> |
| 071G      | 0,0035         | 0,00165        | 0,00687        | 0,00119        | 6,96313E-4     |
| 072A      | 0,00325        | 0,00162        | 3,7803E-4      | 0,00115        | 6,87315E-4     |
| 073V      | 0,00133        | 0,00822        | 9,07252E-4     | 0,00585        | 0,00222        |
| 074A      | 0,01125        | 0,01409        | 0,00714        | 0,01269        | 0,01373        |
| 075S      | 0,01338        | 0,0175         | 0,01654        | 0,01628        | 0,01287        |
| 076N_114A | 0,00625        | 0,01077        | 0,0046         | 0,00638        | 0,00708        |

|      |         |                |                |                |                |
|------|---------|----------------|----------------|----------------|----------------|
| 077G | 0,01041 | 0,00884        | 0,01209        | 0,00521        | 0,0088         |
| 078L | 0,00417 | 0,00821        | 0,00721        | 0,0014         | 0,00736        |
| 079I | 0,00585 | 8,03244E-4     | 0,00131        | 0,00708        | 0,00132        |
| 080V | 0,00503 | 0,00181        | 0,00115        | 0,0035         | 0,00121        |
| 081R | 0,00587 | 0,005          | 0,00351        | 0,00413        | 0,00728        |
| 082D | 0,00712 | 0,00733        | 0,00778        | 0,00338        | 0,00884        |
| 083G | 0,00994 | 0,00108        | 0,0042         | 0,00686        | 0,01515        |
| 085R | 0,00321 | 0,00701        | 2,64053E-4     | 0,00574        | 0,00794        |
| 086V | 0,00352 | 8,02338E-4     | 0,00733        | 0,0024         | 0,00749        |
| 087L | 0,00617 | 0,00224        | 0,00209        | 0,00241        | 0,00138        |
| 088V | 0,00717 | 4,77773E-4     | 3,64557E-4     | 0,00167        | 0,00641        |
| 089V | 0,00444 | 0,00241        | 0,00185        | 0,0064         | 0,00164        |
| 090D | 0,00783 | 0,0096         | 0,00762        | 0,00583        | 0,00856        |
| 091T | 0,0193  | 0,02013        | <b>0,02268</b> | <b>0,02061</b> | <b>0,02246</b> |
| 092A | 0,00691 | 0,00686        | 0,01382        | 0,01262        | 0,01371        |
| 093W | 0,004   | 0,0016         | 9,22173E-4     | 0,00593        | 3,80916E-4     |
| 094T | 0,0139  | 0,01372        | 0,01062        | 0,01048        | 0,01036        |
| 095D | 0,01334 | <b>0,02087</b> | 0,00385        | <b>0,02072</b> | 0,00863        |
| 096D | 0,00664 | 0,00824        | 0,00944        | 0,00675        | 0,0078         |

|           |                |                |                |                |                |
|-----------|----------------|----------------|----------------|----------------|----------------|
| 097Q      | 0,00685        | 0,00846        | 0,00561        | 0,00489        | 0,00983        |
| 098T      | 0,00491        | 0,00113        | 5,61495E-4     | 0,00604        | 0,00332        |
| 100Q      | 0,00297        | 3,70412E-4     | 0,00165        | 0,00582        | 5,47039E-4     |
| 101I      | 0,00422        | 0,00464        | 0,00391        | 0,00719        | 0,00455        |
| 102L      | 0,00331        | 9,63959E-4     | 0,00741        | 0,0016         | 0,00275        |
| 103N      | 0,00909        | 0,00826        | 0,00843        | 0,00705        | 0,01047        |
| 104W      | 0,00799        | 0,00266        | 0,00788        | 0,00332        | 0,00608        |
| 105I      | 0,00433        | 0,00695        | 0,00315        | 0,00252        | 0,00347        |
| 106K_238A | 0,00706        | 0,00198        | 2,92216E-4     | 0,00577        | 0,00142        |
| 107Q      | 0,00405        | 0,00295        | 0,00717        | 0,00273        | 0,00201        |
| 108E      | <b>0,03552</b> | 0,01038        | <b>0,03425</b> | <b>0,03377</b> | <b>0,02934</b> |
| 109I_146N | 0,0049         | 0,00764        | 0,00183        | 0,00258        | 0,00686        |
| 110N_176N | 0,00394        | 3,65623E-4     | 0,00219        | 0,00182        | 0,00145        |
| 111L      | 0,003          | 0,00253        | 0,00687        | 0,0016         | 1,3149E-4      |
| 115L      | 0,00309        | 0,00136        | 0,00689        | 0,00141        | 5,52205E-6     |
| 116A      | 0,00341        | 8,78262E-4     | 0,00707        | 0,00511        | 0,00373        |
| 117V      | 0,00706        | 0,00573        | 0,01078        | 0,004          | 0,00866        |
| 118V      | 0,00651        | 0,01332        | 0,00689        | 0,00812        | 0,00233        |
| 119T      | <b>0,03146</b> | <b>0,02807</b> | <b>0,02832</b> | <b>0,02659</b> | <b>0,03443</b> |



|           |                |                |                |                |                |
|-----------|----------------|----------------|----------------|----------------|----------------|
| 120H      | 0,00809        | 0,00803        | 0,0067         | 0,00856        | 0,01036        |
| 121A      | 0,01131        | 0,01038        | 0,01806        | 0,00913        | 0,00868        |
| 122H      | 0,01753        | 0,01469        | 0,01569        | 0,01413        | 0,02164        |
| 123Q      | 0,0212         | 0,01577        | 0,01861        | <b>0,02677</b> | 0,02181        |
| 124D      | <b>0,03672</b> | <b>0,03582</b> | <b>0,03533</b> | <b>0,03601</b> | <b>0,03832</b> |
| 127G      | <b>0,0265</b>  | <b>0,02746</b> | <b>0,02444</b> | <b>0,02353</b> | <b>0,02973</b> |
| 128G      | 0,01091        | 0,01967        | 0,01989        | 0,01876        | 0,0183         |
| 129M      | 0,00645        | 0,00645        | 0,00883        | 0,00781        | 0,0094         |
| 130D      | 0,00472        | 0,00686        | 0,00348        | 0,00636        | 0,00481        |
| 131A_168W | 0,00342        | 7,29518E-4     | 0,00708        | 0,00113        | 0,00796        |
| 132L      | 0,00248        | 4,18024E-4     | 0,00692        | 0,00594        | 0,00721        |
| 133H_225D | 0,01828        | 0,01852        | 0,02033        | 0,0141         | <b>0,0233</b>  |
| 134A      | 0,00542        | 0,00268        | 0,0047         | 0,00661        | 0,00493        |
| 135A      | 0,00313        | 0,00686        | 5,73616E-4     | 0,00117        | 0,00697        |
| 136G      | 0,00333        | 0,00695        | 0,00298        | 0,00218        | 0,00334        |
| 137I      | 0,00699        | 0,0078         | 0,00387        | 0,00905        | 0,00393        |
| 138A      | 0,00359        | 0,00702        | 0,00709        | 0,00845        | 0,00686        |
| 139T      | 0,02004        | 0,01809        | 0,01761        | 0,01445        | 0,01646        |
| 140Y      | 0,00661        | 0,00821        | 0,00265        | 0,00725        | 0,0069         |

|      |                |                |                |                |                |
|------|----------------|----------------|----------------|----------------|----------------|
| 141A | 0,01046        | 0,00559        | 0,01394        | 0,01435        | 0,00859        |
| 142N | 0,01907        | 0,01618        | 0,0181         | 0,01374        | 0,01587        |
| 143A | 0,01866        | 0,01812        | 0,02239        | <b>0,02124</b> | 0,01999        |
| 144L | 0,00956        | 0,00464        | 0,00617        | 0,0093         | 0,0055         |
| 145S | 0,00781        | 0,00697        | 0,00825        | 0,00684        | 0,002          |
| 147Q | 0,01451        | 0,0147         | 0,01494        | 0,01497        | 0,01637        |
| 148L | 0,01045        | 0,00689        | 0,00704        | 0,00801        | 0,00703        |
| 149A | 0,02005        | 0,01582        | <b>0,02277</b> | <b>0,02485</b> | <b>0,02404</b> |
| 151Q | 0,01425        | 0,01297        | 0,01119        | 0,01182        | 0,01314        |
| 152E | <b>0,02471</b> | <b>0,02452</b> | <b>0,02827</b> | <b>0,02585</b> | <b>0,02502</b> |
| 153G | 0,02147        | 0,01508        | 0,01865        | 0,01671        | <b>0,02448</b> |
| 154M | 0,01768        | 0,01557        | 0,02038        | 0,0104         | 0,01602        |
| 155V | 0,0115         | 0,00972        | 0,00837        | 0,00701        | 0,00792        |
| 156A | 0,00754        | 0,01408        | 0,01387        | 0,01264        | 0,00733        |
| 157A | 0,00306        | 0,00697        | 6,22152E-4     | 0,00113        | 3,58282E-4     |
| 159H | <b>0,03966</b> | <b>0,03557</b> | <b>0,03734</b> | <b>0,03077</b> | <b>0,03724</b> |
| 160S | <b>0,03221</b> | <b>0,02465</b> | <b>0,02633</b> | <b>0,02219</b> | <b>0,04038</b> |
| 161L | 0,01124        | 0,00734        | 0,00784        | 0,00598        | 0,00813        |
| 162T | 0,006          | 0,00473        | 0,00823        | 0,00868        | 0,00781        |

|      |               |                |                |                |                |
|------|---------------|----------------|----------------|----------------|----------------|
| 163F | 0,00338       | 0,00188        | 0,00695        | 0,00158        | 5,30436E-4     |
| 164A | 0,00393       | 0,00686        | 0,00732        | 0,0059         | 0,00616        |
| 166N | 0,0035        | 0,00163        | 8,36377E-4     | 0,00599        | 2,56897E-4     |
| 167G | 1,13827E-4    | 0,00321        | 0,0016         | 0,0034         | 0,00332        |
| 169V | 0,00421       | 0,00375        | 0,00538        | 0,00572        | 0,00575        |
| 170E | 0,00383       | 0,008          | 0,00434        | 0,00164        | 0,00103        |
| 172A | 0,00791       | 0,00807        | 0,00818        | 0,00119        | 0,01936        |
| 173T | 0,00754       | 0,00688        | 0,00297        | 0,00307        | 0,00326        |
| 174A | 0,01084       | 0,01031        | 0,00895        | 0,00895        | 0,01023        |
| 177F | 0,00741       | 0,00192        | 0,0021         | 0,00181        | 0,00686        |
| 178G | 0,00315       | 0,00702        | 7,51766E-4     | 0,00595        | 3,50574E-4     |
| 180L | 0,01137       | 0,00752        | 0,00711        | 0,01297        | 0,014          |
| 181K | 0,0043        | 0,00829        | 7,52211E-4     | 0,00583        | 0,0069         |
| 182V | 0,00428       | 0,00694        | 0,00708        | 0,008          | 0,01392        |
| 184Y | 0,00849       | 0,00823        | 0,00976        | 0,00994        | 0,00558        |
| 188G | 0,01501       | <b>0,02383</b> | <b>0,02301</b> | <b>0,02183</b> | <b>0,02398</b> |
| 189H | 0,0108        | 0,00688        | 0,00351        | 0,00178        | 0,00894        |
| 190T | 0,01569       | 0,01592        | 0,00984        | 0,01364        | 0,00842        |
| 191S | <b>0,0252</b> | <b>0,03196</b> | <b>0,03868</b> | <b>0,03392</b> | 0,01971        |

|      |                |                |                |                |                |
|------|----------------|----------------|----------------|----------------|----------------|
| 192D | 0,01537        | 0,01504        | 0,01569        | 0,01031        | 0,018          |
| 193N | 0,00959        | 0,01039        | 0,00888        | 0,00802        | 0,01123        |
| 194I | <b>0,05979</b> | <b>0,05492</b> | <b>0,05714</b> | <b>0,05002</b> | <b>0,05633</b> |
| 195T | 0,01398        | 0,01384        | 0,01534        | 0,00799        | 0,01054        |
| 196V | 0,01667        | 0,01372        | 0,02059        | 0,01484        | 0,02111        |
| 197G | <b>0,02697</b> | <b>0,02382</b> | <b>0,02395</b> | <b>0,0229</b>  | <b>0,02681</b> |
| 198I | 0,01394        | 0,00349        | 0,00694        | 0,00228        | 0,00747        |
| 199D | 0,00869        | 0,0095         | 0,00684        | 0,00722        | 0,00574        |
| 201T | 0,00557        | 0,00236        | 0,00163        | 0,00577        | 1,01632E-4     |
| 202D | 0,00334        | 0,00776        | 0,00698        | 0,00451        | 0,00435        |
| 203I | 0,00616        | 0,00526        | 0,00711        | 0,00656        | 0,0052         |
| 204A | 0,00392        | 6,17058E-4     | 0,00713        | 0,00574        | 0,00702        |
| 205F | <b>0,02357</b> | <b>0,02064</b> | <b>0,02773</b> | <b>0,02199</b> | <b>0,02785</b> |
| 206G | <b>0,02548</b> | 0,01797        | 0,02219        | <b>0,02095</b> | <b>0,02288</b> |
| 209L | 0,00298        | 7,10977E-4     | 3,0759E-4      | 0,0063         | 0,00233        |
| 210I | 0,00688        | 0,00776        | 0,0117         | 0,01494        | 0,00719        |
| 211K | <b>0,03075</b> | <b>0,02095</b> | <b>0,02843</b> | <b>0,02653</b> | <b>0,02112</b> |
| 212D | 0,00724        | 0,01425        | 0,0142         | 0,01259        | 0,01429        |
| 213S | 0,01422        | <b>0,02152</b> | 0,02129        | <b>0,0195</b>  | <b>0,02154</b> |

|           |                |                |                |                |                |
|-----------|----------------|----------------|----------------|----------------|----------------|
| 214K      | <b>0,04444</b> | <b>0,04873</b> | <b>0,04233</b> | <b>0,03652</b> | <b>0,0268</b>  |
| 215A      | 0,0072         | 0,0015         | 0,00742        | 0,00172        | 0,00765        |
| 217S      | <b>0,04884</b> | <b>0,03748</b> | <b>0,04157</b> | <b>0,03443</b> | <b>0,03916</b> |
| 222G      | 0,00396        | 0,00746        | 0,01371        | 0,01261        | 0,00686        |
| 223D      | 0,00976        | 0,00686        | 0,00146        | 0,00799        | 0,00692        |
| 224A      | 0,01692        | 0,01554        | 0,01766        | 0,01696        | 0,01793        |
| 226T      | 0,01446        | 0,01268        | 0,01714        | 0,01604        | 0,01646        |
| 227E      | 0,02059        | 0,01391        | 0,0213         | 0,01536        | 0,01403        |
| 228H      | <b>0,0539</b>  | <b>0,0555</b>  | <b>0,06221</b> | <b>0,04304</b> | <b>0,06244</b> |
| 229Y      | <b>0,0293</b>  | <b>0,02733</b> | <b>0,03299</b> | <b>0,0256</b>  | <b>0,03282</b> |
| 230A      | <b>0,02392</b> | <b>0,02615</b> | <b>0,02342</b> | <b>0,02284</b> | <b>0,02361</b> |
| 231A      | 0,00854        | 0,00965        | 0,00896        | 0,00809        | 0,0081         |
| 232S      | <b>0,02671</b> | <b>0,02974</b> | <b>0,02898</b> | <b>0,02208</b> | <b>0,03321</b> |
| 233A      | 0,01813        | 0,01527        | 0,01803        | 0,01338        | 0,01975        |
| 234R      | 0,01152        | 0,01227        | 0,0107         | 0,00915        | 0,0118         |
| 235A      | 0,00452        | 0,0078         | 0,00451        | 0,00185        | 0,00958        |
| 236F_265M | 0,00571        | 0,0034         | 0,00886        | 0,00798        | 0,00636        |
| 237G      | 0,00777        | 0,00788        | 0,00547        | 0,00244        | 0,00412        |
| 239A      | 1,554E-4       | 0,00689        | 0,00686        | 0,00142        | 2,89366E-4     |

|           |                |                |                |                |                |
|-----------|----------------|----------------|----------------|----------------|----------------|
| 240F      | 0,00686        | 0,00153        | 0,00688        | 0,00798        | 0,00321        |
| 242K      | 0,00769        | 0,00889        | 0,0026         | 0,01289        | 0,00437        |
| 243A      | 0,00905        | 0,00753        | 0,00748        | 0,00776        | 0,0065         |
| 244S      | 0,0087         | 0,00905        | 0,01437        | 0,00678        | 0,01601        |
| 246I      | 0,01331        | 0,01208        | 0,02109        | 0,01194        | 0,0197         |
| 247V      | 0,01598        | 0,0163         | 0,01566        | 0,01381        | 0,01559        |
| 248M      | <b>0,02787</b> | <b>0,02319</b> | <b>0,03054</b> | <b>0,02324</b> | <b>0,026</b>   |
| 249S      | <b>0,02416</b> | <b>0,0262</b>  | 0,02216        | 0,01925        | <b>0,02555</b> |
| 251S      | <b>0,0328</b>  | <b>0,03069</b> | <b>0,03024</b> | <b>0,03136</b> | <b>0,03107</b> |
| 252A      | 0,02116        | <b>0,02469</b> | <b>0,03138</b> | 0,01771        | 0,02062        |
| 254D      | <b>0,04253</b> | <b>0,03809</b> | <b>0,04566</b> | <b>0,03534</b> | <b>0,04751</b> |
| 255S      | <b>0,02905</b> | <b>0,02557</b> | <b>0,02997</b> | <b>0,02434</b> | <b>0,02898</b> |
| 256R      | 0,00886        | 0,01069        | 0,00989        | 0,01557        | 0,01048        |
| 258A      | 0,00705        | 0,00355        | 0,00827        | 0,00739        | 0,00814        |
| 259I      | 0,00805        | 0,00712        | 0,01024        | 0,01637        | 0,01508        |
| 260T      | 0,01175        | 0,01113        | 0,00903        | 0,01124        | 0,01026        |
| 261H      | 0,01742        | <b>0,02043</b> | 0,01659        | 0,01102        | 0,01801        |
| 262T      | 0,00599        | 0,0077         | 0,00707        | 0,00326        | 7,0326E-4      |
| 263A_266A | <b>0,02201</b> | 0,01094        | 0,01421        | 0,01234        | 0,01709        |

|      |         |         |         |         |         |
|------|---------|---------|---------|---------|---------|
| 264R | 0,01216 | 0,01115 | 0,01314 | 0,00972 | 0,01098 |
| 267D | 0,00708 | 0,0088  | 0,00907 | 0,00818 | 0,00829 |
| 268K | 0,00544 | 0,00107 | 0,00508 | 0,00812 | 0,00564 |
| 269L | 0,00421 | 0,00146 | 0,00468 | 0,00134 | 0,00687 |
| 270R | 0,00334 | 0,00357 | 0,00692 | 0,00118 | 0,00724 |

**Table S4.** Chemical shift changes for the titrated inhibitors with VIM-2.

| AA   | VIM-2 | 5i-2            | 5b-2            | 5b-1            | 5c-1            | 5a-1            | 5c-2            | 5j-1            |
|------|-------|-----------------|-----------------|-----------------|-----------------|-----------------|-----------------|-----------------|
| 026D |       | 0,002973        | 0,002374        | 0,004266        | 0,01009         | 0,00301         | 0,00742         | 0,00155         |
| 027S |       | 0,004049        | 0,005151        | 0,008728        | 0,014481        | 0,014824        | 0,005142        | 0,005841        |
| 028S |       | 0,003402        | 0,005551        | 0,004507        | 0,013653        | 0,012943        | 0,015541        | 0,002415        |
| 029G |       | 0,00475         | 0,005688        | 0,002988        | 0,006731        | 0,006704        | 0,015704        | 0,006573        |
| 030E |       | 0,009145        | 0,020563        | 0,011619        | 0,004271        | 0,005114        | 0,009965        | 0,005876        |
| 031Y |       | <b>0,040506</b> | 0,081188        | <b>0,069448</b> | <b>0,074381</b> | 0,056682        | 0,075268        | 0,024127        |
| 033T |       | <b>0,067571</b> | <b>0,095838</b> | <b>0,109287</b> | <b>0,142233</b> | <b>0,126043</b> | <b>0,111111</b> | <b>0,058233</b> |
| 034V |       | 0,033483        | <b>0,09828</b>  | <b>0,07954</b>  | 0,066596        | 0,019325        | 0,073338        | 0,024558        |
| 035S |       | 0,00271         | 0,011615        | 0,002821        | 0,001           | 0,005156        | 0,006257        | 0,007004        |
| 036E |       | 0,007527        | 0,030459        | 0,009571        | 0,02107         | 0,034886        | 0,018545        | 0,023578        |
| 037I |       | 0,033192        | 0,072923        | <b>0,058786</b> | <b>0,07622</b>  | 0,047687        | <b>0,096537</b> | 0,029601        |
| 041E |       | 0,004106        | 0,004375        | 0,007019        | 0,013908        | 0,024781        | 0,012408        | 0,013606        |
| 042V |       | 0,010957        | 0,013137        | 0,030407        | 0,018234        | 0,040356        | 0,039208        | 0,0195          |
| 043R |       | 0,012244        | 0,055998        | <b>0,051314</b> | 0,067691        | 0,034865        | 0,044237        | 0,007352        |
| 044L |       | <b>0,043284</b> | <b>0,111383</b> | <b>0,08678</b>  | <b>0,069636</b> | <b>0,062277</b> | <b>0,092986</b> | <b>0,036377</b> |
| 045Y |       | <b>0,05605</b>  | <b>0,117025</b> | <b>0,070109</b> | 0,061274        | 0,02935         | 0,091104        | 0,033778        |
| 046Q |       | 0,017104        | 0,022354        | 0,016147        | 0,013555        | 0,012872        | 0,022986        | 0,007646        |



|      |                 |                 |                 |                 |                 |                 |                 |
|------|-----------------|-----------------|-----------------|-----------------|-----------------|-----------------|-----------------|
| 047I | 0,012806        | 0,033795        | 0,019364        | 0,028574        | 0,020151        | 0,027131        | 0,009946        |
| 048A | 0,001135        | 0,010103        | 0,01168         | 0,014061        | 0,016183        | 0,009876        | 0,002939        |
| 049D | 0,010628        | 0,015544        | 0,013669        | 0,012848        | 0,001993        | 0,005009        | 0,004762        |
| 050G | 0,006207        | 0,012803        | 0,011394        | 0,008705        | 0,002893        | 0,005555        | 0,001639        |
| 051V | 0,010953        | 0,012208        | 0,013288        | 0,021531        | 0,012241        | 0,015713        | 0,012669        |
| 052W | 0,006824        | 0,019829        | 0,015853        | 0,016153        | 0,005072        | 0,011253        | 0,008898        |
| 053S | 0,022513        | 0,032606        | 0,026447        | 0,016766        | 0,012157        | 0,020938        | 0,007511        |
| 054H | 0,014652        | 0,039484        | 0,031504        | 0,019595        | 0,023802        | 0,027867        | 0,01185         |
| 055I | 0,006423        | 0,050126        | 0,013109        | 0,010743        | 0,027903        | 0,041117        | 0,009458        |
| 056A | 0,014644        | 0,018883        | 0,008659        | 0,067368        | 0,04363         | 0,081645        | 0,018093        |
| 062G | <b>0,06996</b>  | <b>0,129042</b> | <b>0,111774</b> | <b>0,119491</b> | <b>0,077834</b> | <b>0,129824</b> | <b>0,060616</b> |
| 063A | 0,028186        | 0,084147        | <b>0,054143</b> | <b>0,070824</b> | 0,052148        | <b>0,094945</b> | 0,026509        |
| 064V | <b>0,057641</b> | 0,077233        | <b>0,081178</b> | <b>0,104408</b> |                 | 0,082165        | <b>0,06919</b>  |
| 065Y |                 | <b>0,145667</b> |                 | <b>0,164978</b> | <b>0,152405</b> | <b>0,171454</b> | <b>0,08554</b>  |
| 069G |                 | <b>0,255943</b> |                 |                 |                 |                 |                 |
| 071I | 0,018772        | 0,046539        | 0,013623        | 0,01462         | 0,00268         | 0,047132        | 0,010154        |
| 072V | 0,000703        | 0,012913        | 0,004175        | 0,004809        | 0,006845        | 0,002106        | 0,005796        |
| 073R | 0,002822        | 0,001208        | 0,009626        | 0,005984        | 0,005368        | 0,003668        | 0,004682        |
| 074D | 0,003871        | 0,002357        | 0,011285        | 0,013262        | 0,011314        | 0,002137        | 0,010393        |

|      |                 |                 |                 |                 |                 |                 |                 |
|------|-----------------|-----------------|-----------------|-----------------|-----------------|-----------------|-----------------|
| 075G | 0,004719        | 0,004884        | 0,006427        | 0,004385        | 0,002809        | 0,007426        | 0,00591         |
| 076D | 0,008625        | 0,008413        | 0,00712         | 0,019334        | 0,025974        | 0,019896        | 0,012086        |
| 077E | 0,002748        | 0,003303        | 0,00438         | 0,010961        | 0,014751        | 0,015577        | 0,001848        |
| 078L | 0,006615        | 0,004408        | 0,006527        | 0,006005        | 0,010003        | 0,005957        | 0,002621        |
| 079L | 0,01641         | 0,024431        | 0,006254        | 0,014798        | 0,015587        | 0,035433        | 0,013243        |
| 080L | 0,031617        | 0,063568        | 0,022898        | 0,027555        | 0,017361        | 0,073234        | 0,014174        |
| 081I | 0,030389        | 0,049649        | 0,019983        | 0,028531        | 0,009345        | 0,060695        | 0,018425        |
| 082D | 0,013483        | 0,06851         | 0,010901        | 0,012911        | 0,012136        | 0,062022        | 0,006376        |
| 083T |                 | 0,089636        | <b>0,053851</b> | 0,043977        | 0,014967        | <b>0,094755</b> | 0,016341        |
| 095A | 0,029149        | 0,037568        | 0,020229        | 0,015283        | 0,030284        | 0,028614        | 0,026282        |
| 096E | 0,024452        | 0,053129        | 0,030945        | 0,031179        | 0,028841        | 0,050627        | 0,009891        |
| 097I | 0,018059        | 0,044402        | 0,025656        | 0,019599        | 0,009892        | 0,026088        | 0,006076        |
| 098E | 0,008194        | 0,0185          | 0,010051        | 0,019158        | 0,024451        | 0,026022        | 0,010781        |
| 099K | 0,011036        | 0,021349        | 0,008088        | 0,009804        | 0,00775         | 0,022953        | 0,009632        |
| 100Q | 0,008815        | 0,030649        | 0,014094        | 0,009482        | 0,009278        | 0,013672        | 0,004512        |
| 101I | <b>0,073724</b> | <b>0,089852</b> | <b>0,076444</b> | <b>0,114798</b> | <b>0,104096</b> | <b>0,172367</b> | <b>0,080592</b> |
| 102G | 0,011629        | 0,030173        | 0,005001        | 0,005231        | 0,015538        | 0,010491        | 0,009092        |
| 103L | 0,000677        | 0,001221        | 0,004502        | 0,010123        | 0,006803        | 0,007488        | 0,010724        |
| 105V | 0,001992        | 0,00939         | 0,001842        | 0,011563        | 0,016301        | 0,014736        | 0,009741        |

|           |                 |          |                 |                 |                 |                 |                 |
|-----------|-----------------|----------|-----------------|-----------------|-----------------|-----------------|-----------------|
| 106T      | 0,005578        | 0,00823  | 0,010958        | 0,022379        | 0,025389        | 0,008923        | 0,016571        |
| 107R      | 0,016527        | 0,02548  | 0,016464        | 0,027142        | 0,023902        | 0,035236        | 0,018586        |
| 108A      | 0,011259        | 0,021044 | 0,012007        | 0,028216        | 0,026514        | 0,040132        | 0,010151        |
| 109V      | 0,013104        | 0,036509 | 0,009012        | 0,017393        | 0,015597        | 0,057382        | 0,00616         |
| 110S      | 0,023445        | 0,040402 | 0,01299         | 0,033479        | 0,00328         | 0,023449        | 0,009872        |
| 122D      | 0,021098        | 0,033279 | 0,031029        | 0,037776        | 0,041901        | 0,040634        | 0,026319        |
| 123V/196C | 0,006988        | 0,027599 | 0,004948        | 0,00597         | 0,021467        | 0,033551        | 0,011719        |
| 124L      | <b>0,043437</b> | 0,031458 | 0,036273        | 0,048948        | 0,054082        | 0,047004        | <b>0,054218</b> |
| 125R      | <b>0,045216</b> | 0,131377 | <b>0,073883</b> | <b>0,087608</b> | <b>0,059982</b> | <b>0,146099</b> | 0,034068        |
| 126A      | 0,005397        | 0,011653 | 0,009799        | 0,004918        | 0,00561         | 0,010333        | 0,002918        |
| 127A      | 0,009934        | 0,018069 | 0,011824        | 0,009125        | 0,013193        | 0,015917        | 0,007756        |
| 128G      | 0,012067        | 0,023268 | 0,01872         | 0,018619        | 0,02129         | 0,026264        | 0,013381        |
| 129V      | 0,002813        | 0,003355 | 0,004624        | 0,004414        | 0,006808        | 0,007984        | 0,003019        |
| 130A      | 0,006266        | 0,003488 | 0,009118        | 0,015732        | 0,016217        | 0,021156        | 0,011241        |
| 131T      | 0,023211        | 0,016183 | 0,027814        | 0,034977        | 0,044598        | 0,029667        | 0,029748        |
| 132Y      | 0,015242        | 0,030132 | 0,03197         | 0,027675        | 0,033401        | 0,029275        | 0,016146        |
| 133A      | 0,009508        | 0,026967 | 0,011482        | 0,003444        | 0,011997        | 0,014749        | 0,004648        |
| 134S      | 0,013756        | 0,042401 | 0,040134        | 0,052254        | 0,018758        | 0,061067        | 0,023245        |
| 136S      | 0,005524        | 0,016022 | 0,013895        | 0,0122          | 0,013366        | 0,018207        | 0,008389        |

|           |                 |          |                 |                 |                 |                 |                 |
|-----------|-----------------|----------|-----------------|-----------------|-----------------|-----------------|-----------------|
| 137T      | 0,010733        | 0,030904 | 0,017196        | 0,028569        | 0,014777        | 0,043972        | 0,009273        |
| 138R      | 0,012897        | 0,033901 | 0,019172        | 0,031839        | 0,012693        | 0,044067        | 0,010364        |
| 139R      | 0,005013        | 0,016464 | 0,012019        | 0,01966         | 0,008979        | 0,047187        | 0,006353        |
| 141V      | 0,007545        | 0,010967 | 0,009133        | 0,023059        | 0,023037        | 0,019615        | 0,010062        |
| 142E      | 0,003003        | 0,008869 | 0,012045        | 0,01364         | 0,005067        | 0,0069          | 0,009273        |
| 143V      | <b>0,035942</b> | 0,023007 | 0,016194        | 0,017298        | 0,023902        | 0,010254        | 0,016514        |
| 144E      | 0,007828        | 0,005328 | 0,025639        | 0,024895        | 0,027804        | 0,029715        | 0,007246        |
| 145G      | 0,000731        | 0,005083 | 0,002781        | 0,009353        | 0,009058        | 0,00851         | 0,002616        |
| 146N      | 0,018636        | 0,040054 | 0,009649        | 0,011241        | 0,012234        | 0,048382        | 0,00651         |
| 147E/156L | 0,003725        | 0,014573 | 0,005208        | 0,004029        | 0,006184        | 0,001891        | 0,00578         |
| 148I      | 0,017989        | 0,032568 | 0,018741        | 0,01617         | 0,029329        | 0,023958        | 0,009019        |
| 150T      | <b>0,052157</b> | 0,063459 | <b>0,060975</b> | <b>0,108881</b> | <b>0,108274</b> | <b>0,126474</b> | <b>0,060623</b> |
| 151H      | 0,035255        | 0,019151 | 0,035542        | <b>0,071313</b> | <b>0,121312</b> | 0,081973        | <b>0,048962</b> |
| 152S      | 0,030727        | 0,032011 | 0,038888        | 0,058471        | <b>0,070571</b> | 0,05545         | 0,027879        |
| 153L      | 0,015754        | 0,020317 | 0,010701        | 0,026421        | 0,020282        | 0,035753        | 0,015483        |
| 154E      | 0,004578        | 0,013542 | 0,009062        | 0,007965        | 0,005742        | 0,017177        | 0,002389        |
| 155G      | 0,000922        | 0,012326 | 0,005035        | 0,014593        | 0,012962        | 0,022371        | 0,007444        |
| 157S      | 0,004205        | 0,008144 | 0,003613        | 0,006045        | 0,004834        | 0,016248        | 0,005777        |
| 158S      | 0,009075        | 0,01177  | 0,011167        | 0,026771        | 0,042583        | 0,035855        | 0,015776        |

|      |                |                 |                 |                 |                 |                 |                 |
|------|----------------|-----------------|-----------------|-----------------|-----------------|-----------------|-----------------|
| 159S | 0,004215       | 0,007161        | 0,003502        | 0,004394        | 0,001604        | 0,008872        | 0,002912        |
| 160G | 0,008776       | 0,035247        | 0,023517        | 0,03727         | 0,021728        | 0,043087        | 0,010177        |
| 161D | 0,006113       | 0,015657        | 0,010415        | 0,00841         | 0,004981        | 0,011467        | 0,001717        |
| 162A | 0,004867       | 0,001093        | 0,00654         | 0,002468        | 0,014133        | 0,005124        | 0,001485        |
| 163V | 0,010355       | 0,010747        | 0,012478        | 0,014111        | 0,02566         | 0,02182         | 0,010844        |
| 164R | 0,003485       | 0,011368        | 0,006147        | 0,005578        | 0,013529        | 0,0175          | 0,0049          |
| 165F | 0,002754       | 0,001719        | 0,006386        | 0,003553        | 0,01434         | 0,008867        | 0,005033        |
| 166G | 0,011936       | 0,015149        | 0,008143        | 0,016367        | 0,013254        | 0,034167        | 0,017493        |
| 168V | 0,002843       | 0,003087        | 0,004695        | 0,008137        | 0,015031        | 0,002314        | 0,010658        |
| 169E | 0,006604       | 0,011328        | 0,008054        | 0,015621        | 0,011385        | 0,007512        | 0,013359        |
| 170L | 0,001548       | 0,004569        | 0,002756        | 0,001755        | 0,002271        | 0,008068        | 0,01075         |
| 171F | 0,004674       | 0,009277        | 0,008357        | 0,023078        | 0,025775        | 0,013476        | 0,009526        |
| 172Y | 0,002665       | 0,009148        | 0,004144        | 0,010722        | 0,003943        | 0,020373        | 0,006132        |
| 175A | <b>0,03716</b> | 0,07463         | <b>0,052224</b> | 0,057451        | 0,051889        | 0,066486        | 0,028472        |
| 176A | <b>0,06898</b> | <b>0,128966</b> | <b>0,07953</b>  | <b>0,110744</b> | 0,051816        | <b>0,133607</b> | <b>0,050529</b> |
| 177H |                | <b>0,167176</b> |                 |                 |                 | <b>0,17603</b>  |                 |
| 178S | 0,028787       | <b>0,093884</b> | <b>0,057523</b> | 0,059381        | 0,022172        | <b>0,094605</b> | 0,030062        |
| 179T | 0,025985       | <b>0,10105</b>  | 0,021811        | 0,010417        | <b>0,068121</b> | <b>0,10226</b>  | 0,026689        |
| 180D | 0,031028       | 0,01753         | 0,019014        | 0,024004        | 0,042528        | 0,022002        | <b>0,036214</b> |

|      |                 |                 |                 |                 |          |                 |                 |
|------|-----------------|-----------------|-----------------|-----------------|----------|-----------------|-----------------|
| 181N | 0,009347        | 0,025518        | 0,009412        | 0,002301        | 0,008382 | 0,013273        | 0,002941        |
| 182L | 0,020189        | 0,049514        | 0,016435        | 0,031325        | 0,015791 | 0,066494        | 0,009215        |
| 183V | 0,018225        | 0,036744        | 0,018541        | 0,063469        | 0,021358 | 0,053241        | 0,022119        |
| 184V | 0,00824         | 0,018773        | 0,011467        | 0,028361        | 0,016666 | 0,01995         | 0,020775        |
| 185Y | 0,006491        | 0,011886        | 0,002188        | 0,005872        | 0,002465 | 0,02112         | 0,004456        |
| 186V | 0,002793        | 0,022721        | 0,012534        | 0,019947        | 0,002527 | 0,020527        | 0,001686        |
| 188S | 0,029211        | 0,034287        | 0,041425        | 0,051265        | 0,054976 | <b>0,116339</b> | 0,021668        |
| 189A | 0,00438         | 0,010534        | 0,005585        | 0,008069        | 0,009891 | 0,012435        | 0,008529        |
| 190S | 0,004258        | 0,009071        | 0,00094         | 0,010617        | 0,016442 | 0,015942        | 0,002696        |
| 191V | 0,001646        | 0,001453        | 0,005829        | 0,01118         | 0,006229 | 0,012255        | 0,013722        |
| 192L | 0,001934        | 0,021854        | 0,005489        | 0,00251         | 0,005612 | 0,024777        | 0,002523        |
| 193Y | 0,018315        | 0,043128        | 0,015126        | 0,048383        | 0,017316 | 0,067339        | 0,023095        |
| 194G | 0,026419        | 0,047473        | 0,02689         | 0,049271        | 0,022444 | 0,064142        | <b>0,039684</b> |
| 197A | 0,007939        | 0,06897         | 0,029523        | 0,031642        | 0,031867 | 0,06288         | 0,013918        |
| 198I | 0,028533        | 0,071123        | 0,032267        | <b>0,07626</b>  | 0,015589 | <b>0,109746</b> | <b>0,036026</b> |
| 199Y | <b>0,044513</b> | 0,078923        | <b>0,069905</b> | <b>0,094554</b> |          | <b>0,098069</b> | <b>0,045896</b> |
| 202S | 0,016552        | 0,020928        | 0,013982        | 0,041349        |          | 0,076887        | 0,015485        |
| 203R | <b>0,058631</b> | <b>0,114009</b> | <b>0,090294</b> | <b>0,116826</b> | 0,057754 | <b>0,179825</b> | <b>0,085399</b> |
| 205S |                 | <b>0,12945</b>  |                 |                 |          | <b>0,178816</b> |                 |

|      |                 |                 |                 |          |                 |          |                 |
|------|-----------------|-----------------|-----------------|----------|-----------------|----------|-----------------|
| 206A | <b>0,40036</b>  |                 |                 |          |                 |          |                 |
| 209V | <b>0,037114</b> | 0,067559        | <b>0,052485</b> | 0,050412 | 0,036294        | 0,039819 | 0,032138        |
| 210A | <b>0,046718</b> | <b>0,096764</b> | <b>0,076376</b> | 0,060636 | 0,047348        | 0,089644 | <b>0,042486</b> |
| 213D | 0,001997        | 0,016334        | 0,010378        | 0,004539 | 0,006695        | 0,007987 | 0,009214        |
| 214L | <b>0,08359</b>  | <b>0,170652</b> | <b>0,113551</b> | 0,05304  | <b>0,062269</b> |          | <b>0,054132</b> |
| 215A | 0,011081        | 0,023254        | 0,009705        | 0,020806 | 0,021413        | 0,027703 | 0,007856        |
| 216E | 0,028231        | 0,02018         | 0,020381        | 0,036218 | 0,045217        | 0,023449 | 0,016579        |
| 219T | 0,023717        | 0,03154         | 0,024229        | 0,039932 | 0,03612         | 0,040052 | 0,014951        |
| 220S | 0,013855        | 0,023436        | 0,015531        | 0,026756 | 0,029226        | 0,032328 | 0,007205        |
| 221I | 0,009658        | 0,026842        |                 | 0,007007 | 0,006671        | 0,008296 | 0,006199        |
| 222E | 0,000778        | 0,020978        | 0,008324        | 0,018551 | 0,024613        | 0,034588 | 0,004107        |
| 223R | 0,01645         | 0,042802        | 0,022123        | 0,038277 | 0,035327        | 0,053092 | 0,005557        |
| 224I | 0,002984        | 0,005874        | 0,004294        | 0,009354 | 0,009           | 0,002304 | 0,005659        |
| 225Q | 0,017633        | 0,02746         | 0,019109        | 0,023623 | 0,006661        | 0,040604 | 0,012229        |
| 226Q | 0,004036        | 0,015601        | 0,006304        | 0,008349 | 0,005702        | 0,024723 | 0,008745        |
| 227H | 0,030884        | 0,02842         | 0,027951        | 0,037024 | 0,044194        | 0,03967  | 0,031518        |
| 228Y | 0,013362        | 0,015903        | 0,015557        | 0,021549 | 0,013007        | 0,017612 | 0,005383        |
| 230E | 0,015911        | 0,009047        | 0,017016        | 0,032463 | 0,055203        | 0,035039 | 0,020203        |
| 231A | 0,004235        | 0,007342        | 0,009201        | 0,018803 | 0,022469        | 0,015874 | 0,00656         |

|      |                 |                 |                 |                 |                 |                 |                 |
|------|-----------------|-----------------|-----------------|-----------------|-----------------|-----------------|-----------------|
| 232Q | 0,002688        | 0,020405        | 0,021285        | 0,026119        | 0,028431        | 0,045891        | 0,019988        |
| 233F | 0,007843        | 0,014342        | 0,037           | 0,052603        | 0,029187        | 0,01538         | 0,030598        |
| 234V | 0,007808        | 0,011852        | 0,033663        | 0,042419        | 0,033094        | 0,01607         | 0,023347        |
| 235I | 0,012633        | 0,033069        | 0,01528         | 0,052707        | 0,009962        | 0,067972        | 0,015123        |
| 237G | <b>0,040999</b> | <b>0,102416</b> | 0,045399        | 0,06643         | 0,029587        | <b>0,174503</b> | 0,0105          |
| 238H |                 | <b>0,239213</b> |                 | <b>0,169212</b> |                 | <b>0,244523</b> |                 |
| 239G |                 |                 |                 |                 |                 | <b>0,229935</b> |                 |
| 242G | 0,005509        | 0,028218        | 0,021967        | 0,033923        | 0,010422        | 0,030419        | 0,012083        |
| 244L | 0,006505        | 0,032666        | 0,011945        | 0,019858        | 0,00963         | 0,046146        | 0,005641        |
| 245D | 0,02536         | 0,022431        | 0,022718        | 0,037661        | 0,029649        | 0,043312        | 0,024623        |
| 246I | 0,014947        | 0,024015        | 0,016772        | 0,031655        | <b>0,058786</b> | 0,026061        | 0,002671        |
| 247L | 0,007598        | 0,039377        | 0,020254        | 0,032013        | 0,026367        | 0,048405        | 0,004716        |
| 248K | 0,01434         | 0,042156        | 0,019462        | 0,040919        | 0,023411        | 0,08184         | 0,026817        |
| 249H | 0,006226        | 0,016536        | 0,011188        | 0,010224        | 0,010226        | 0,009815        | 0,004831        |
| 250T | <b>0,038213</b> | 0,062577        | <b>0,052246</b> | <b>0,069534</b> | <b>0,06674</b>  | 0,079488        | <b>0,041326</b> |
| 252N | <b>0,039376</b> | 0,050465        | 0,048748        | <b>0,081378</b> | <b>0,086444</b> | 0,079245        | 0,033173        |
| 254V | 0,025472        | 0,042417        | 0,020048        | 0,042275        | <b>0,096544</b> | 0,01512         | 0,021309        |
| 255K | <b>0,058836</b> | 0,069111        | <b>0,064704</b> | <b>0,08856</b>  | <b>0,115756</b> | 0,083204        | <b>0,042943</b> |
| 256A | <b>0,059839</b> | 0,090646        | <b>0,072985</b> | <b>0,105599</b> | <b>0,099834</b> | <b>0,126824</b> | <b>0,041908</b> |



|      |                 |                 |                 |                 |                 |                 |                 |
|------|-----------------|-----------------|-----------------|-----------------|-----------------|-----------------|-----------------|
| 257H | <b>0,044528</b> | 0,022529        | 0,04823         | 0,06183         | <b>0,100049</b> | 0,065491        | <b>0,036703</b> |
| 258T | <b>0,050975</b> | 0,084446        | <b>0,072017</b> | <b>0,119376</b> | <b>0,137014</b> | 0,076343        | <b>0,036448</b> |
| 259N | 0,017116        | 0,027377        | 0,027716        | 0,01918         | 0,021037        | 0,035188        | 0,005902        |
| 260R | <b>0,072629</b> | <b>0,104093</b> | <b>0,092009</b> | <b>0,128579</b> | <b>0,132502</b> | <b>0,125824</b> | <b>0,054315</b> |
| 261S | 0,033188        | 0,051217        | 0,038979        | 0,048606        | 0,047937        | 0,042688        | 0,014222        |
| 262V | 0,015436        | 0,018649        | 0,013393        | 0,024955        | 0,025504        | 0,029532        | 0,012623        |
| 263V | 0,014485        | 0,021663        | 0,013062        | 0,026388        | 0,026794        | 0,030837        | 0,010219        |
| 264E | 0,013323        | 0,004688        | 0,003171        | 0,012729        | 0,018111        | 0,016396        | 0,007985        |

## 7. Chemical shift perturbation histograms

Chemical shift perturbation was calculated according equation (1) <sup>2</sup>

$$\text{CSP} = \Delta\delta_{(1\text{H},15\text{N})} = \sqrt{(\Delta\delta_{1\text{H}})^2 + (1/R_{\text{scale}} \times \Delta\delta_{15\text{N}})^2} \quad R_{\text{scale}} = 6.5 \quad (1)$$

Where  $\Delta\delta_{1\text{H}}$  is the chemical shift change for proton dimension,  $\Delta\delta_{15\text{N}}$  is the chemical shift change for nitrogen dimension,  $R_{\text{scale}}$  is a scaling factor.

The chemical shift perturbations (CSP) were classified as significant (SSP) when the observed  $\Delta\delta_{(1\text{H},15\text{N})}$  was greater than the population mean plus the standard deviation ( $\mu+1\sigma$ ) – solid line; ( $\mu+2\sigma$ ) – dashed line, and ( $\mu+3\sigma$ ) – dashed line.

Further on,  $K_d$  was calculated according: <sup>3</sup>

$$\Delta\delta_{\text{max}}\Delta\delta_{\text{obs}} = \Delta\delta_{\text{max}} \frac{([P]+[L]+K_d) - \sqrt{([P]+[L]+K_d)^2 - 4[P][L]}}{2[P]} \quad (2)$$

Where  $K_d$  is the dissociation constant,  $[P]$  and  $[L]$  are protein and ligand concentrations, respectively.  $\Delta\delta_{\text{max}}$  were estimated in MestReNova by extrapolation of the observed chemical shift differences  $\Delta\delta_{\text{obs}}$ .

The histograms for the titrated compounds (indicated in the y axis title) with NDM-1

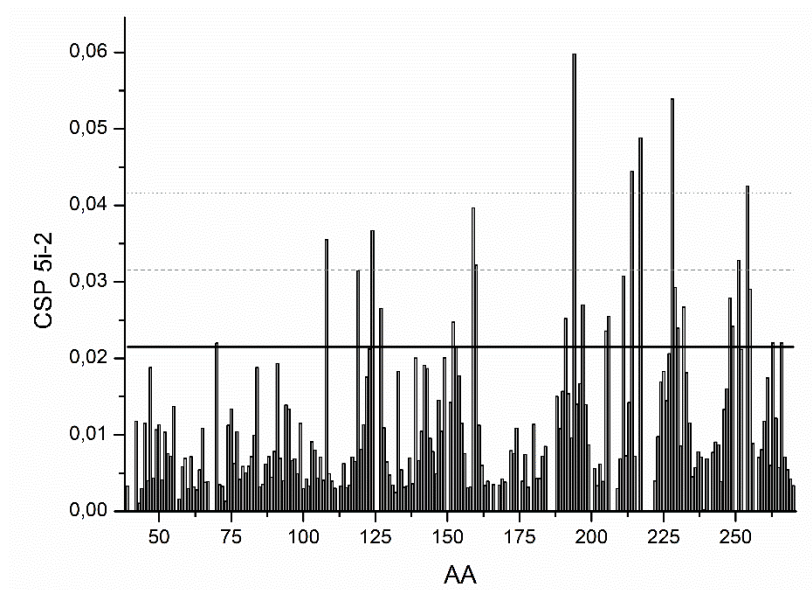

**Figure S165.** The chemical shift perturbations observed for the backbone amides of  $^{15}\text{N}$ -labelled NDM-1 upon addition of **5i-2**.

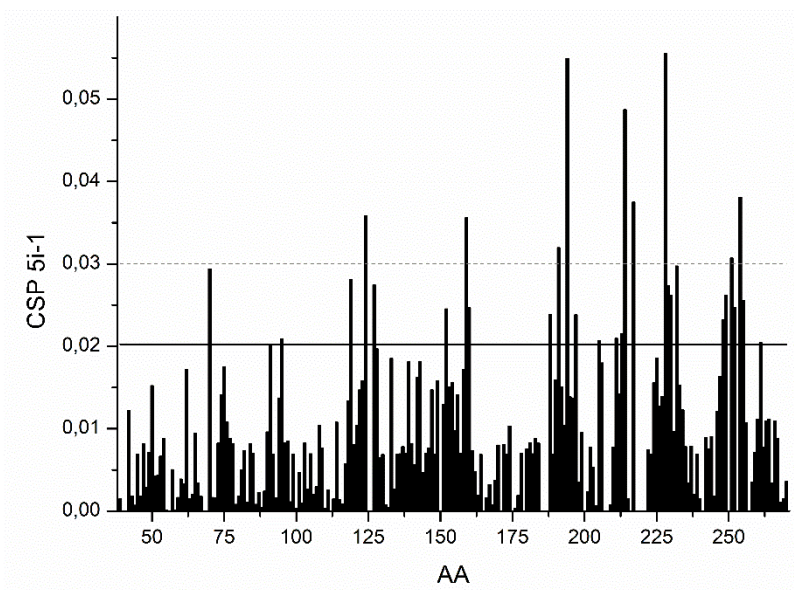

**Figure S166.** The chemical shift perturbations observed for the backbone amides of  $^{15}\text{N}$ -labelled NDM-1 upon addition of **5i-1**.

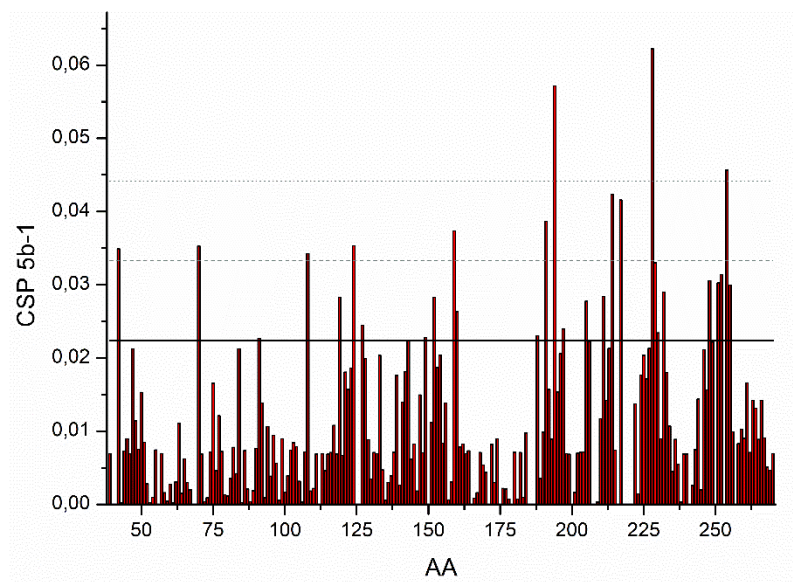

**Figure S167.** The chemical shift perturbations observed for the backbone amides of  $^{15}\text{N}$ -labelled NDM-1 upon addition of **5b-1**.

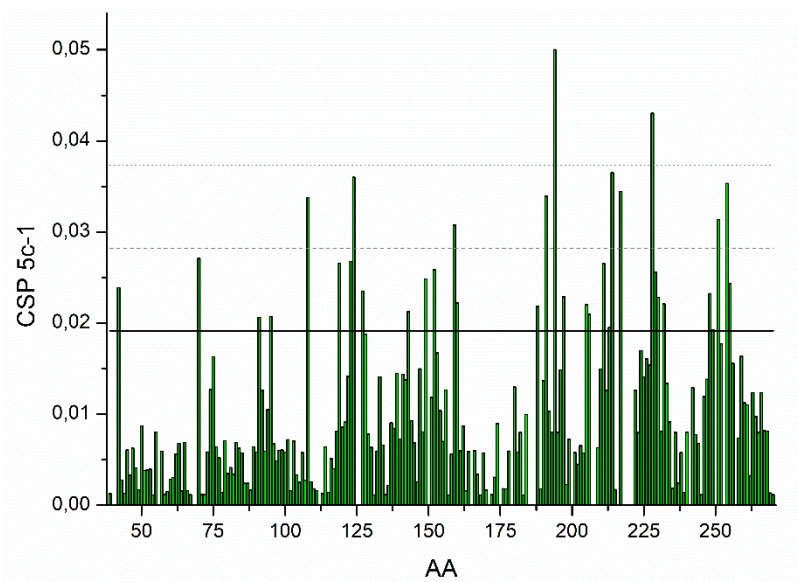

**Figure S168.** The chemical shift perturbations observed for the backbone amides of  $^{15}\text{N}$ -labelled NDM-1 upon addition of **5c-1**.

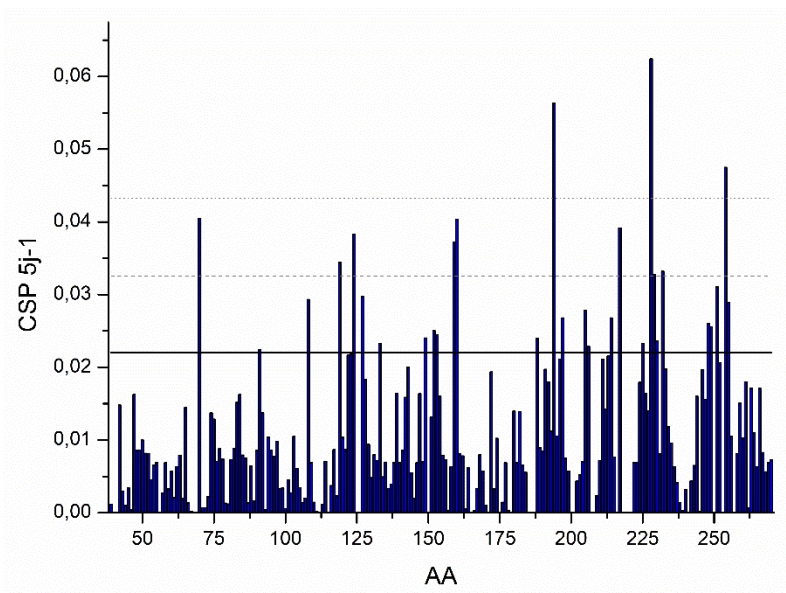

**Figure S169.** The chemical shift perturbations observed for the backbone amides of  $^{15}\text{N}$ -labelled NDM-1 upon addition of **5j-1**.

Below are presented all histograms for compounds titrated (indicated in the y axis title) with VIM-2

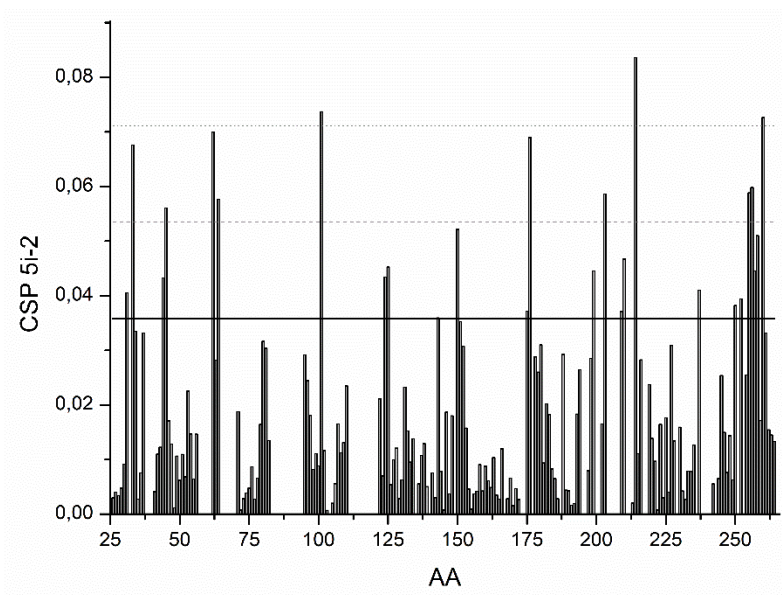

**Figure S170.** The chemical shift perturbations observed for the backbone amides of  $^{15}\text{N}$ -labelled VIM-2 upon addition of **5i-2**.



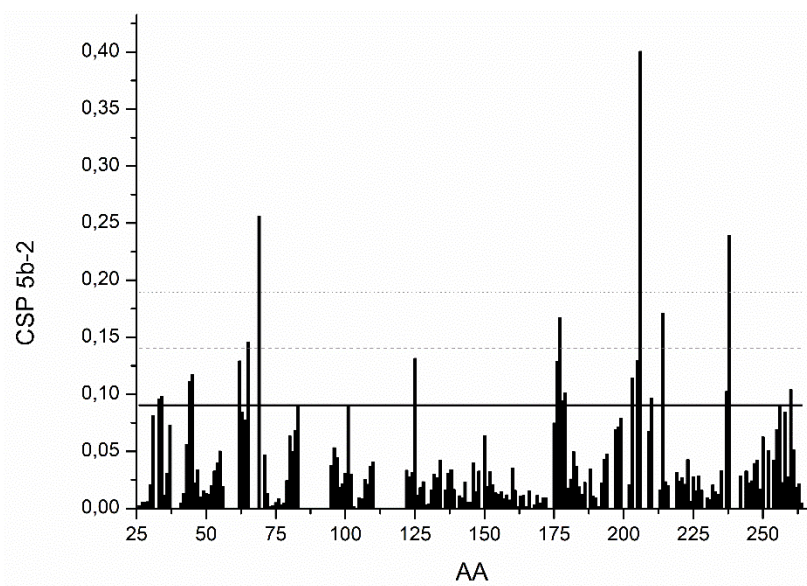

**Figure S171.** The chemical shift perturbations observed for the backbone amides of  $^{15}\text{N}$ -labelled VIM-2 upon addition of **5b-2**.

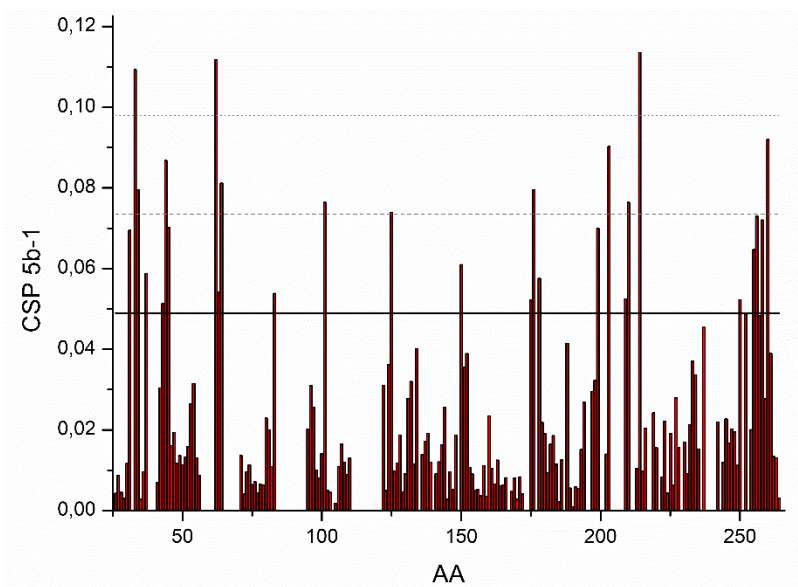

**Figure S172.** The chemical shift perturbations observed for the backbone amides of  $^{15}\text{N}$ -labelled VIM-2 upon addition of **5b-1**.

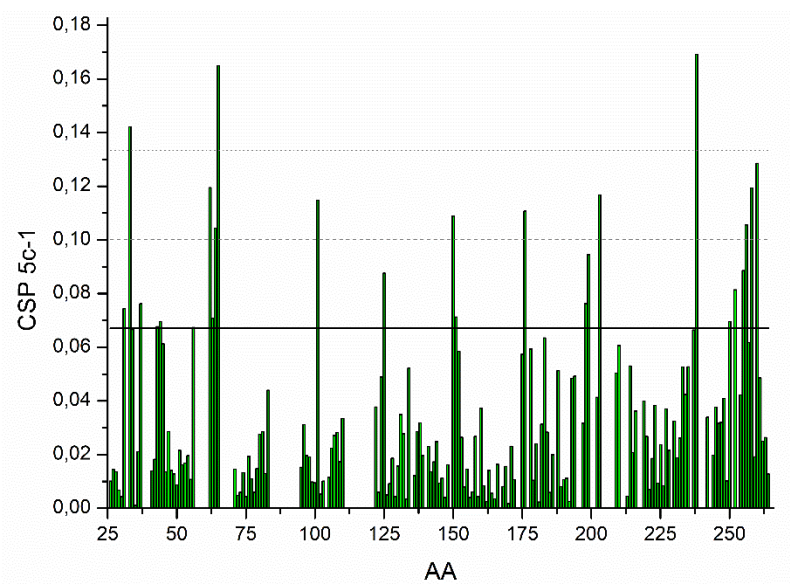

**Figure S173.** The chemical shift perturbations observed for the backbone amides of  $^{15}\text{N}$ -labelled VIM-2 upon addition of **5c-1**.

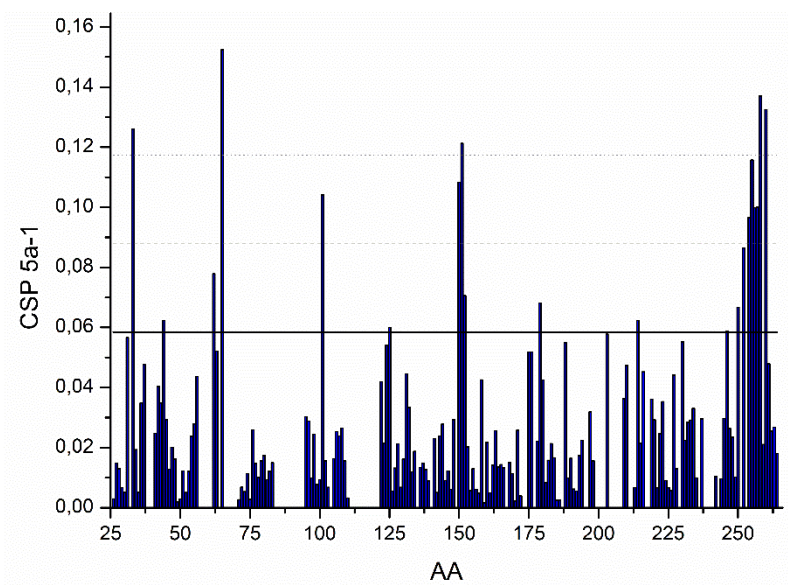

**Figure S174.** The chemical shift perturbations observed for the backbone amides of  $^{15}\text{N}$ -labelled VIM-2 upon addition of **5a-1**.

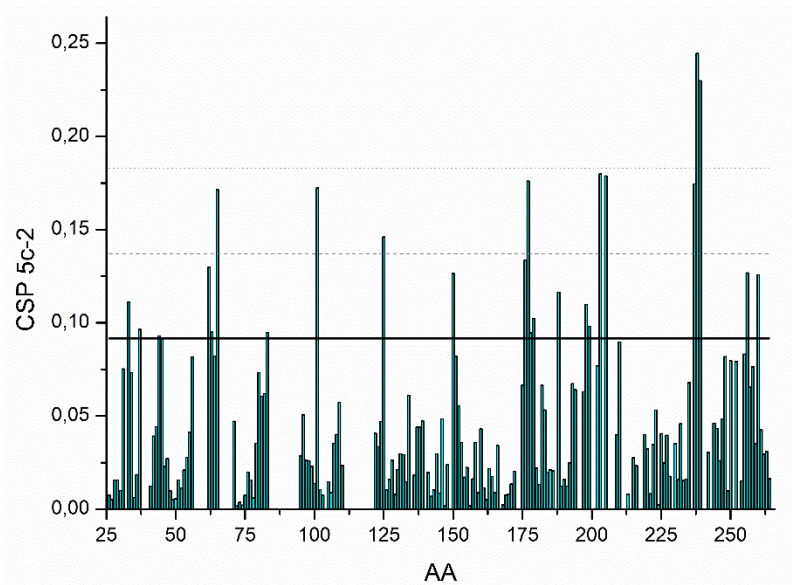

**Figure S175.** The chemical shift perturbations observed for the backbone amides of  $^{15}\text{N}$ -labelled VIM-2 upon addition of **5c-2**.

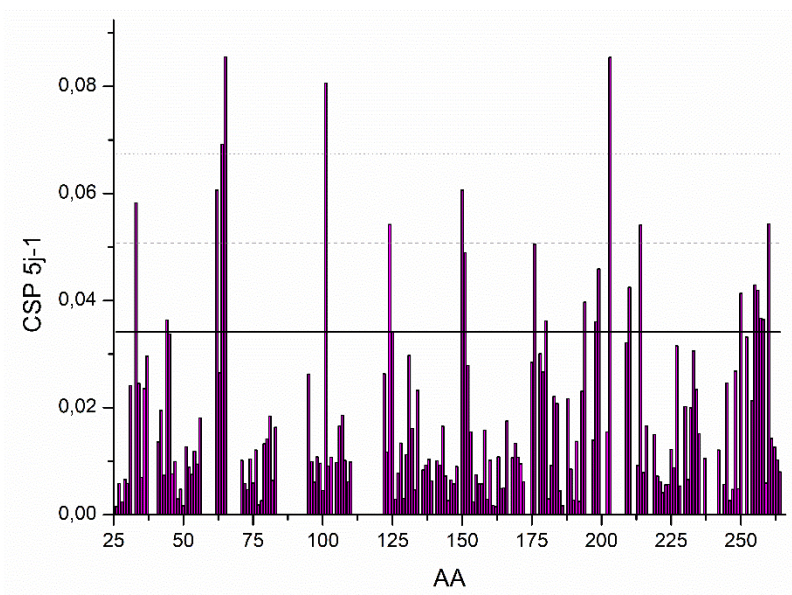

**Figure S176.** The chemical shift perturbations observed for the backbone amides of  $^{15}\text{N}$ -labelled VIM-2 upon addition of **5j-1**.

## 8. Estimation of binding constants ( $K_d$ )

**Table S5.** Estimated binding constants

| <b>AA NDM-1</b> | <b>5i-2</b> | <b>5i-1</b> | <b>5b-1</b> | <b>5c-1</b> | <b>5j-1</b> |
|-----------------|-------------|-------------|-------------|-------------|-------------|
| 070F            | 4.90        |             | 2.92        | 15.21       | 2.54        |
| 091T            |             |             | 5.76        | 4.17        | 2.11        |
| 108E            | 2.03        |             | 6.63        | 4.50        | 3.54        |
| 119T            | 26.36       | 0.93        | 18.13       | 10.67       | 7.97        |
| 123Q            |             |             |             | 1.69        |             |
| 124D            | 14.14       | 3.53        | 3.17        | 5.76        | 12.39       |
| 127G            | 1.76        | 8.94        | 8.34        | 10.76       | 12.39       |
| 133H_225D       |             |             |             |             | 1.42        |
| 143A            |             |             |             | 8.49        |             |
| 149A            |             |             | 1.71        | 1.76        | 3.18        |
| 152E            | 1.18        |             | 3.52        | 3.85        | 32.94       |
| 159H            | 8.30        | 2.47        | 21.48       | 11.67       | 8.39        |
| 160S            | 17.62       | 0.25        | 8.97        | 5.40        | 15.69       |
| 188G            |             | 0.49        | 3.40        | 15.77       | 6.63        |
| 191S            |             | 0.12        | 0.85        | 0.48        |             |

|           |       |      |       |       |       |
|-----------|-------|------|-------|-------|-------|
| 194I      | 2.49  | 4.99 | 2.93  | 6.26  | 6.10  |
| 197G      | 15.23 | 1.27 | 10.41 | 1.51  | 3.05  |
| 205F      | 6.84  | 2.30 | 10.98 | 3.19  | 8.41  |
| 206G      | 6.81  |      |       | 3.95  | 7.72  |
| 211K      | 17.1  | 0.14 | 3.49  | 10.05 |       |
| 213S      |       | 0.39 |       | 9.53  |       |
| 214K      | 0.78  | 0.57 | 1.357 | 6.40  | 1.96  |
| 217S      | 16.44 | 3.06 | 10.45 | 11.85 | 8.15  |
| 228H      | 10.14 | 3.08 | 11.04 | 17.90 | 4.94  |
| 229Y      | 2.30  | 0.34 | 2.241 | 6.74  | 1.31  |
| 230A      | 2.71  | 0.18 | 4.33  | 11.50 | 8.81  |
| 232S      | 5.57  | 0.93 | 12.07 | 10.25 | 21.28 |
| 248M      | 2.58  | 0.78 | 12.90 | 36.59 | 8.64  |
| 249S      | 8.45  |      | 1.71  | 4.15  | 34.01 |
| 251S      | 3.38  | 1.82 | 6.07  | 15.43 | 12.27 |
| 252A      |       | 0.48 | 3.48  |       |       |
| 254D      | 5.01  | 7.53 | 9.74  | 5.56  | 9.29  |
| 255S      | 1.66  | 9.91 | 7.37  | 10.55 | 18.64 |
| 263A_266A | 0.69  |      |       |       |       |



## 9. Linear correlation of chemical shift perturbation

**Table S6.** Parameters from linear regression for titrated compounds with NDM-1.

| Equation                | $y = a + b \cdot x$     |                         |                       |                         |
|-------------------------|-------------------------|-------------------------|-----------------------|-------------------------|
| Plot                    | 5i-1                    | 5b-1                    | 5c-1                  | 5j-1                    |
| Weight                  | No Weighting            |                         |                       |                         |
| Intercept               | 2,52095E-4 ± 5,09129E-4 | 3,49794E-4 ± 4,91977E-4 | 9,96625E-4 ± 4,358E-4 | 4,78525E-4 ± 5,20324E-4 |
| Slope                   | 0,91064 ± 0,0325        | 0,97999 ± 0,03148       | 0,80359 ± 0,02789     | 0,94623 ± 0,0333        |
| Residual Sum of Squares | 0,00406                 | 0,00384                 | 0,00301               | 0,0043                  |
| Pearson's r             | 0,89774                 | 0,91436                 | 0,90209               | 0,89974                 |
| R-Square (COD)          | 0,80593                 | 0,83605                 | 0,81377               | 0,80953                 |
| Adj. R-Square           | 0,8049                  | 0,83519                 | 0,81279               | 0,80853                 |

The linear regression of the chemical shift perturbations of ligands **5i-1**, **5b-1**, **5c-1** and **5j-1** as a function of the chemical shift perturbations of the amino acids of **5i-2**.

The linear correlations of the chemical shift perturbations observed for a specific ligand in comparison with those observed for 5i-2 (x-axis) for NDM-1 titrations

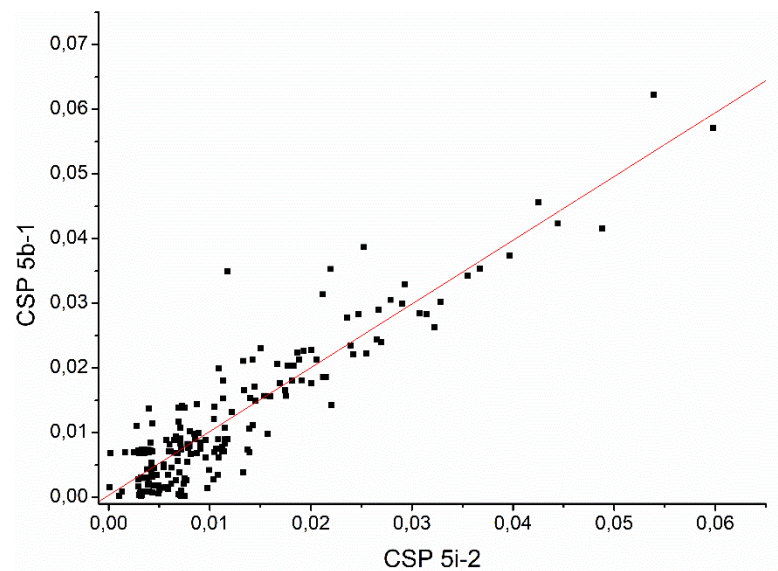

**Figure S177.** The linear regression of the chemical shift perturbations of ligands **5b-1** as a function of the chemical shift perturbations of the amino acids of **5i-2**.

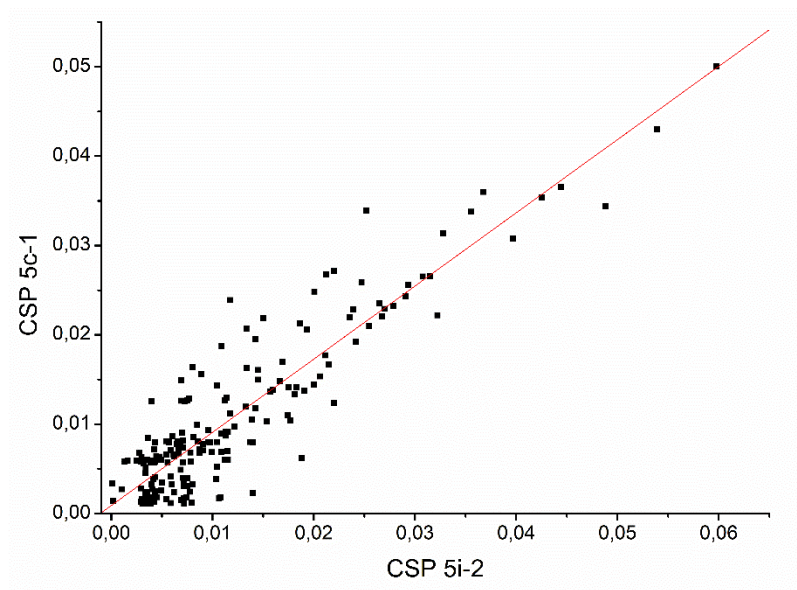

**Figure S178.** The linear regression of the chemical shift perturbations of ligands **5c-1** as a function of the chemical shift perturbations of the amino acids of **5i-2**.

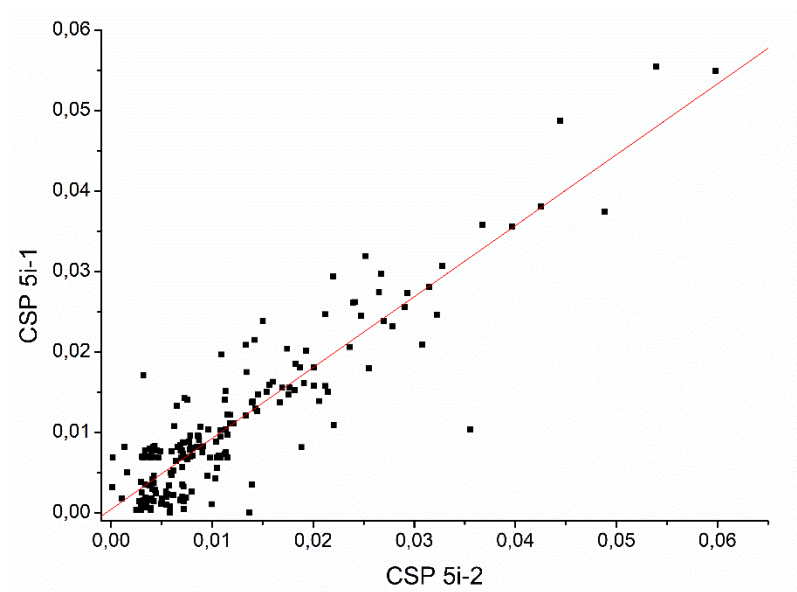

**Figure S179.** The linear regression of the chemical shift perturbations of ligands **5i-1** as a function of the chemical shift perturbations of the amino acids of **5i-2**.

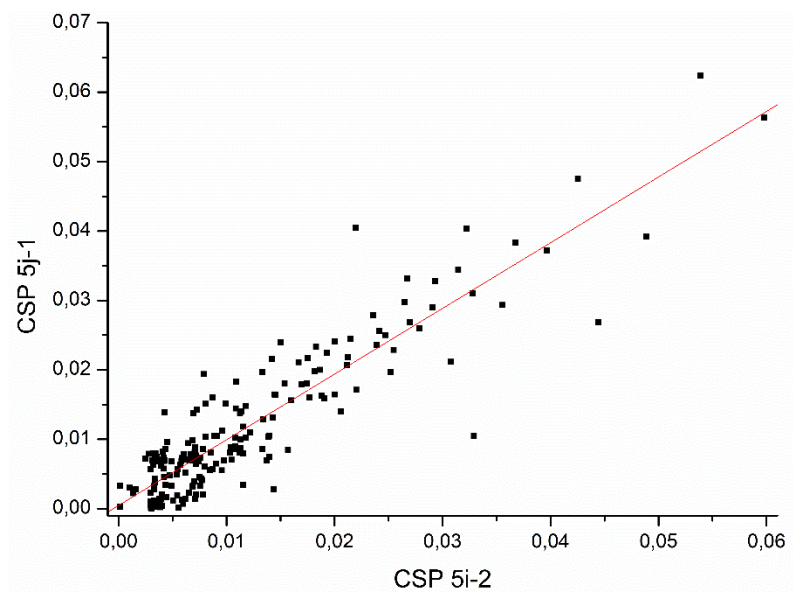

**Figure S180.** The linear regression of the chemical shift perturbations of ligands **5j-1** as a function of the chemical shift perturbations of the amino acids of **5i-2**.

**Table S7.** Parameters from linear regression for titrated compounds with VIM-2.

| Equation                | $y = a + b \cdot x$ |                   |                   |                   |                   |                      |
|-------------------------|---------------------|-------------------|-------------------|-------------------|-------------------|----------------------|
| Plot                    | 5b-2                | 5b-1              | 5c-1              | 5a-1              | 5c-2              | 5j-1                 |
| Weight                  | No Weighting        |                   |                   |                   |                   |                      |
| Intercept               | 0,00622 ± 0,00189   | 0,00153 ± 0,00115 | 0,00579 ± 0,0017  | 0,00619 ± 0,00196 | 0,00925 ± 0,00237 | 0,00289 ± 8,81227E-4 |
| Slope                   | 1,53935 ± 0,0744    | 1,25313 ± 0,04543 | 1,46721 ± 0,06694 | 1,24922 ± 0,07875 | 1,79865 ± 0,09657 | 0,78234 ± 0,03477    |
| Residual Sum of Squares | 0,04847             | 0,01794           | 0,03924           | 0,05102           | 0,07453           | 0,01059              |
| Pearson's r             | 0,84817             | 0,90605           | 0,86142           | 0,77811           | 0,8224            | 0,86716              |
| R-Square (COD)          | 0,71939             | 0,82093           | 0,74205           | 0,60545           | 0,67634           | 0,75197              |
| Adj. R-Square           | 0,71771             | 0,81985           | 0,7405            | 0,60304           | 0,67439           | 0,75048              |

The linear regression of the chemical shift perturbations of ligands **5i-1**, **5b-1**, **5c-1** and **5j-1** as a function of the chemical shift perturbations of the amino acids of **5i-2**.

The linear correlations of the chemical shift perturbations observed for a specific ligand in comparison with those observed for 5i-2 (x-axis) for VIM-2 titrations.

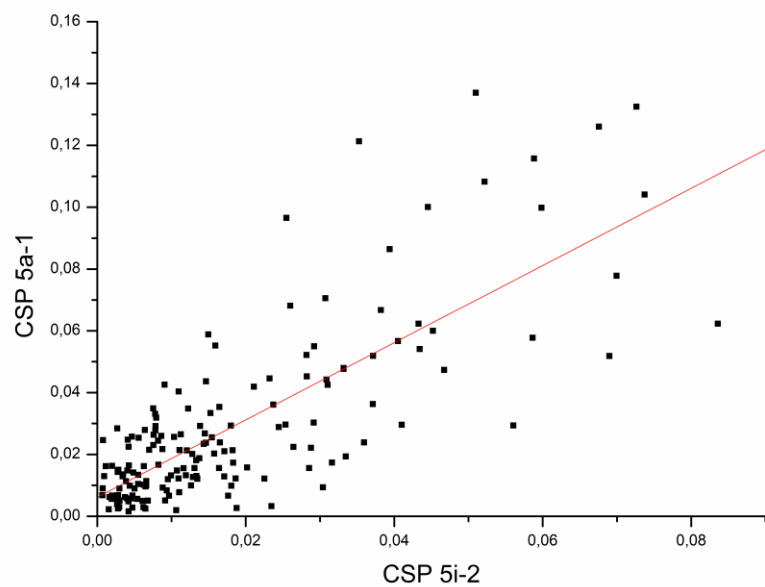

**Figure S181.** The linear regression of the chemical shift perturbations of ligands **5a-1** as a function of the chemical shift perturbations of the amino acids of **5i-2**.

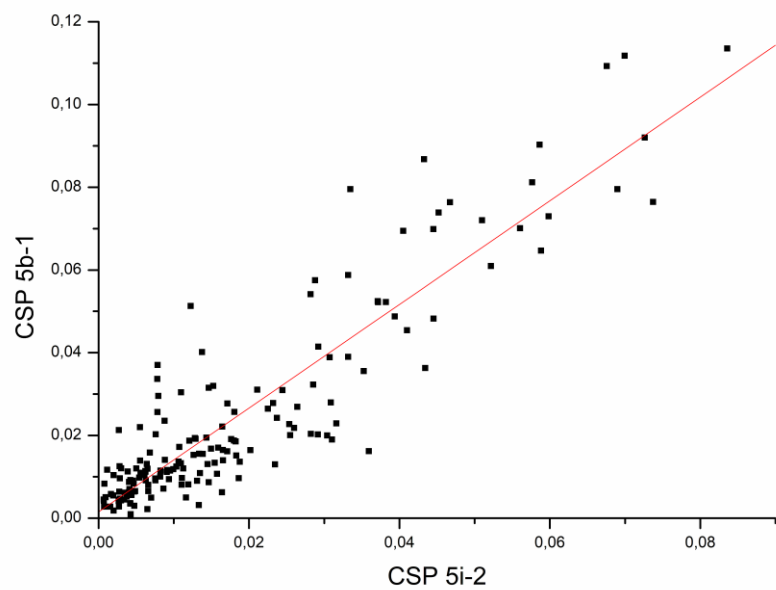

**Figure S182.** The linear regression of the chemical shift perturbations of ligands **5b-1** as a function of the chemical shift perturbations of the amino acids of **5i-2**.



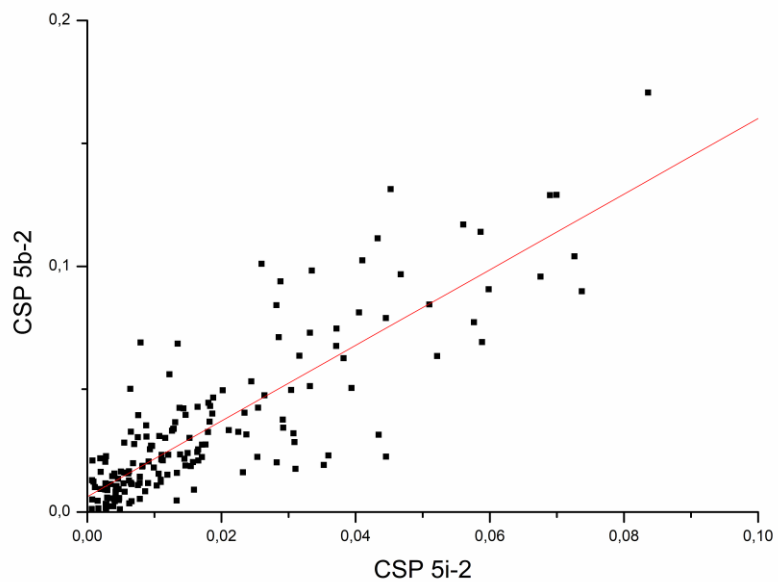

**Figure S183.** The linear regression of the chemical shift perturbations of ligands **5b-2** as a function of the chemical shift perturbations of the amino acids of **5i-2**.

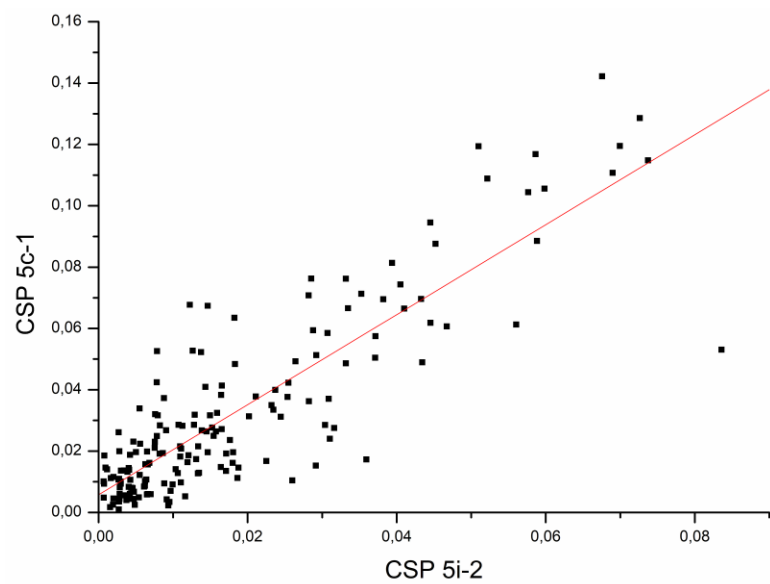

**Figure S184.** The linear regression of the chemical shift perturbations of ligands **5c-1** as a function of the chemical shift perturbations of the amino acids of **5i-2**.

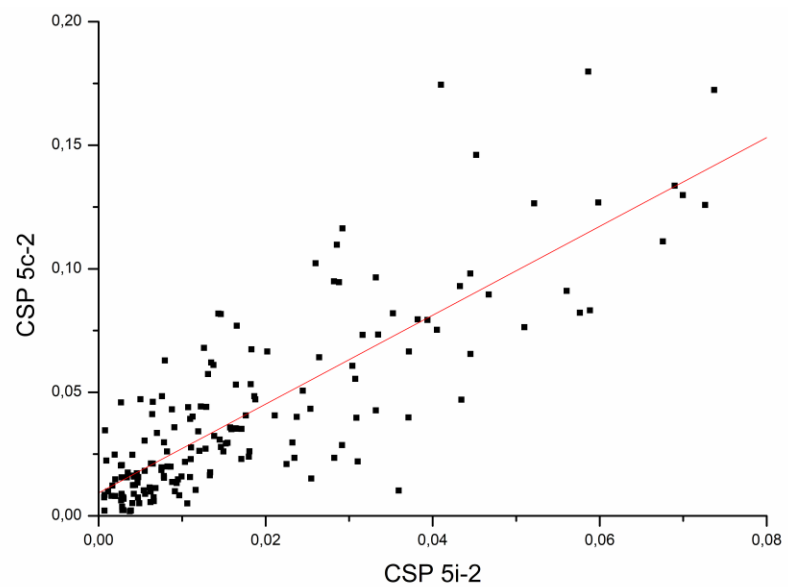

**Figure S185.** The linear regression of the chemical shift perturbations of ligands **5c-2** as a function of the chemical shift perturbations of the amino acids of **5i-2**.

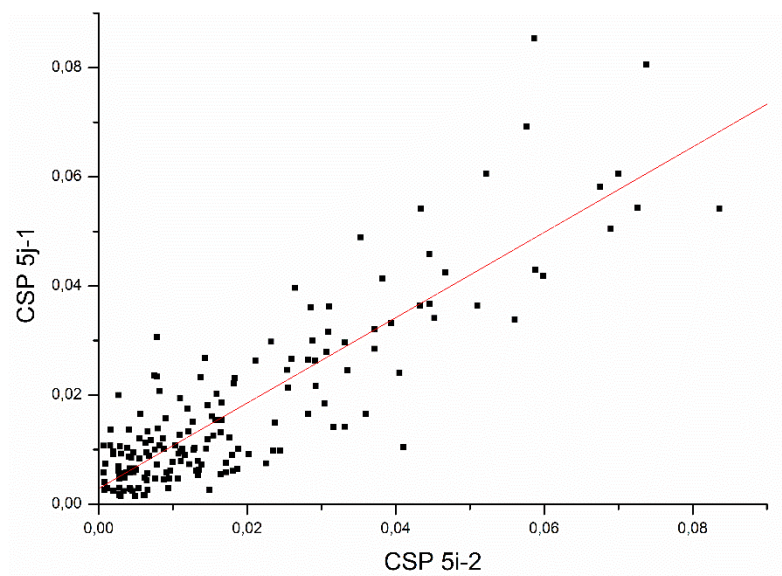

**Figure S186.** The linear regression of the chemical shift perturbations of ligands **5j-1** as a function of the chemical shift perturbations of the amino acids of **5i-2**.

## 10. Evaluation of the binding energies of the docking poses

**Table S8.** Docking poses of ligands to VIM-2<sup>1</sup>

| Compound code | $\pi$ -cation [kcal/mol] | $\pi$ - $\pi$ [kcal/mol] |
|---------------|--------------------------|--------------------------|
| 5a-1-RS       | <b>-42.8</b>             | -36.6                    |
| 5a-1-SR       | n.b. <sup>2</sup>        | -24.1                    |
| 5b-1-SR       | -32.2                    | -32.4                    |
| 5b-1-RS       | <b>-43.8</b>             | -33.0                    |
| 5b-2-SS       | -30.3                    | -11.7                    |
| 5b-2-RR       | <b>-30.7</b>             | -20.1                    |
| 5c-1-RS       | <b>-48.5</b>             | -33.6                    |
| 5c-1-SR       | -33.5                    | -4.2                     |
| 5c-2-RR       | <b>-37.2</b>             | -27.4                    |
| 5c-2-SS       | n.b.                     | -28.1                    |
| 5i-2-SS*      | -47.0                    | -43.0                    |
| 5i-2-RR*      | <b>-49.2</b>             | -38.1                    |
| 5j-1-RS*      | <b>-46.2</b>             | -38.8                    |
| 5j-1-SR*      | n.b.                     | -10.4                    |

<sup>1</sup>Compounds marked with a \* are more flexible due to a CH<sub>2</sub> being incorporated between the amide and the aromatic ring. Energies highlighted in green correspond to the binding modes with the lowest energy among the possible stereoisomers. The docking poses correspond to the orientations that provide stabilization through a  $\pi$ -cation or a  $\pi$ - $\pi$  interaction, as described in the main text. <sup>2</sup> n.b., the docking did not provide any feasible binding mode for this stereoisomer.

**Table S9.** Docking poses of ligands of RS/SR (left) and SS/RR (right) configurations. Energies are shown for the preferred binding mode that has a  $\pi$ -cation interaction to VIM-2<sup>1</sup>

|             | <i>RS</i>    | <i>SR</i> |
|-------------|--------------|-----------|
| <b>5a-1</b> | <b>-42.9</b> | n.b.      |
| <b>5b-1</b> | <b>-43.8</b> | -32.2     |
| <b>5c-1</b> | <b>-48.5</b> | -33.5     |
| <b>5j-1</b> | <b>-46.2</b> | n.b.      |

n.b.: the docking did not provide any feasible binding mode for this stereoisomer.

|             | <i>RR</i>    | <i>SS</i> |
|-------------|--------------|-----------|
| <b>5b-2</b> | <b>-30.7</b> | -30.3     |
| <b>5c-2</b> | <b>-37.2</b> | n.b.      |
| <b>5i-2</b> | <b>-49.2</b> | -46.9     |

n.b.: the docking did not provide any feasible binding mode for this stereoisomer.

Dominating  $\pi$ -cation binding mode always has lower binding energy for the *RS* as compared to the *SR*, and for the *RR* as compared to the *SS* stereoisomer.

**Table S10.** Docking poses of ligands to NDM-1<sup>1</sup>

| Compound code   | $\pi$ -cation [kcal/mol] | $\pi$ - $\pi$ [kcal/mol] |
|-----------------|--------------------------|--------------------------|
| <b>5b-1-RS</b>  | <b>-36.9</b>             | n.b.                     |
| <b>5b-1-SR</b>  | -32.2                    | -35.8                    |
| <b>5c-1-RS</b>  | <b>-44.6</b>             | n.b.                     |
| <b>5c-1-SR</b>  | -32.2                    | -38.3                    |
| <b>5i-2-SS*</b> | -13.9                    | -14.9                    |
| <b>5i-2-RR*</b> | -29.3                    | <b>-43.3</b>             |
| <b>5i-1-RS*</b> | n.b.                     | n.b.                     |
| <b>5i-1-SR*</b> | <b>-45.0</b>             | -22.7                    |
| <b>5j-1-RS*</b> | -30.0                    | n.b.                     |
| <b>5j-1-SR*</b> | <b>-41.5</b>             | -33.5                    |

<sup>1</sup>Compounds marked with a \* are more flexible due to a CH<sub>2</sub> being incorporated between the amide and the aromatic ring. Energies highlighted in green correspond to the binding modes with the lowest energy among the possible stereoisomers. The docking poses correspond to the orientations that provide stabilization through a  $\pi$ -cation or a  $\pi$ - $\pi$  interaction, as described in the main text. <sup>2</sup> n.b., the docking did not provide any feasible binding mode for this stereoisomer.

For the more rigid type of ligand, lacking a CH<sub>2</sub> group in between the aromatic moiety and the amide, the *RS* configuration provides a better binding energy than *SR*, as a rule. This configuration shows a preference for the binding mode participating in  $\pi$ -cation interaction. The *RR* isomer provides better binding energy than the *SS* isomer, and it shows a  $\pi$ - $\pi$  interaction.’

**11. The root-mean-square deviation of atomic positions of the binding energies of the docking poses**

**Table S11.** The root-mean-square deviation of atomic positions of the binding energies of the docking poses

| <b>Compound</b> | <b>pi-cation<br/>NDM-1<br/>[kcal/mol]</b> | <b>pi-cation<br/>VIM-2<br/>[kcal/mol]</b> |
|-----------------|-------------------------------------------|-------------------------------------------|
| <b>5a-1-RS</b>  | -                                         | 0                                         |
| <b>5b-1-RS</b>  | 2.65                                      | 3.78                                      |
| <b>5b-2-RR</b>  | -                                         | 3.83                                      |
| <b>5c-1-RS</b>  | 0                                         | 3.21                                      |
| <b>5c-2-RR</b>  | -                                         | 3.58                                      |
| <b>5i-RR</b>    | 2.68                                      | 3.43                                      |
| <b>5i-SR</b>    | 2.39                                      | 3.59                                      |
| <b>5j-1-SR</b>  | 2.59                                      | 3.70                                      |
| <b>Mean</b>     | 2.58±0.12                                 | 3.57±0.21                                 |



**12. SDS-Page Analysis for <sup>15</sup>N-labelled NDM-1 and VIM-2**

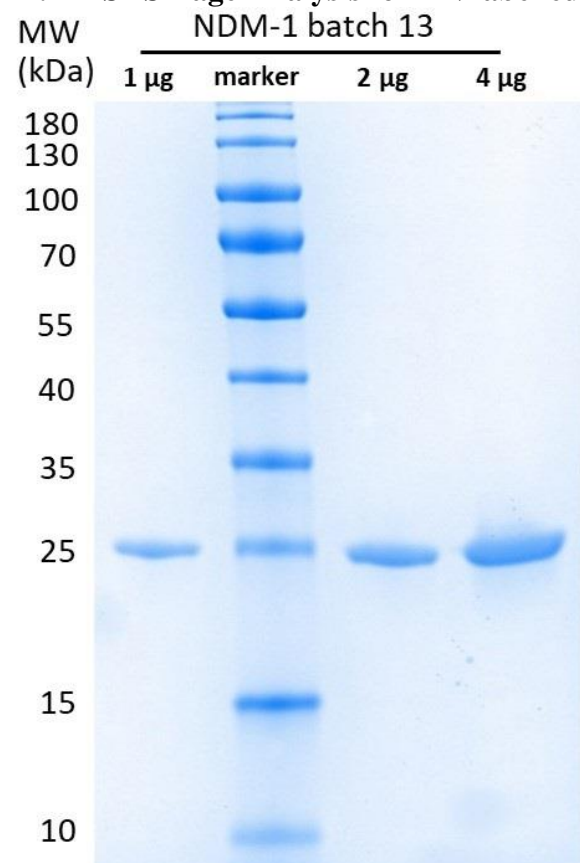

**Figure S187.** SDS-PAGE analysis of samples of the NDM-1 batch 13, final product.

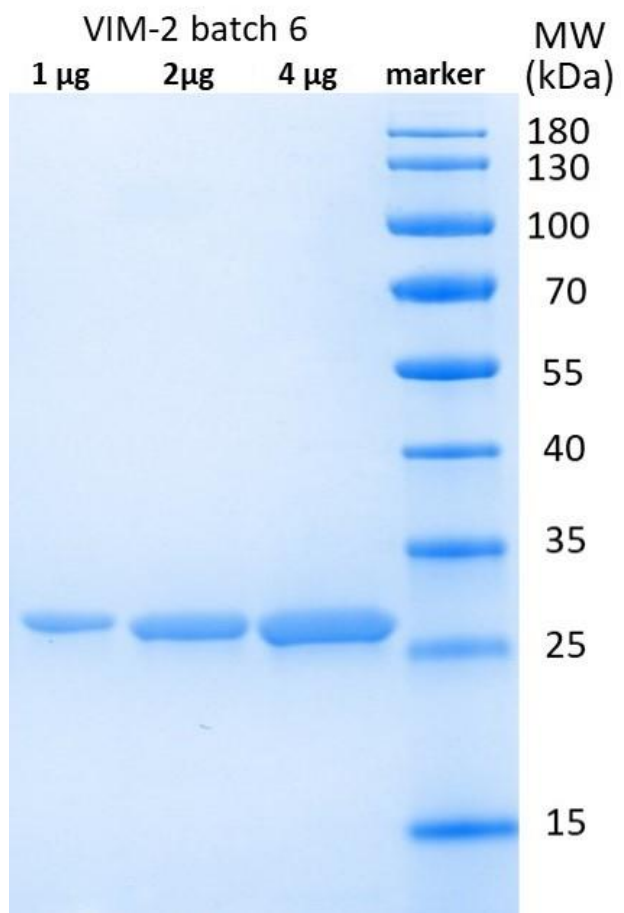

**Figure S188.** SDS-PAGE analysis of samples of the VIM-2 batch 6, final product.

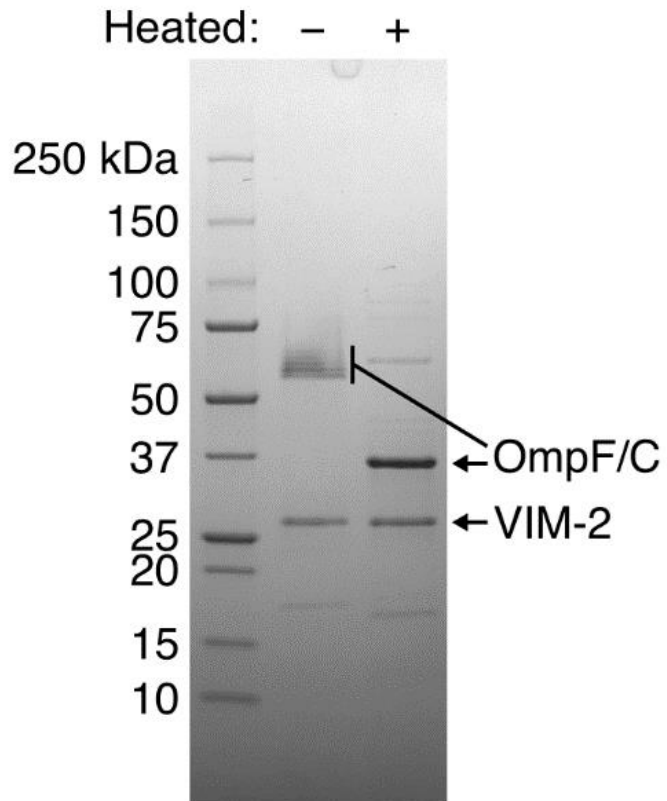

**Figure S189.** SDS-page analysis of OMVs carrying VIM-2 inside their lumen. Samples were left at room temperature (-) or heat-denatured at 98 °C (+) for 15 minutes prior to separation.

### 13. Long term stability

The stability of the  $\alpha$ -aminophosphonate inhibitors was evaluated by LC-MS, following 3 months after the preparation of the stock solutions (prepared in the buffer 20 mM  $\text{KPO}_4$ , 0.1 mM  $\text{ZnCl}_2$ , pH 7.0 with 10%  $\text{D}_2\text{O}$  and 2.5%  $\text{DMSO-}d_6$ ). The UV chromatograms and mass spectra of selected samples is shown.

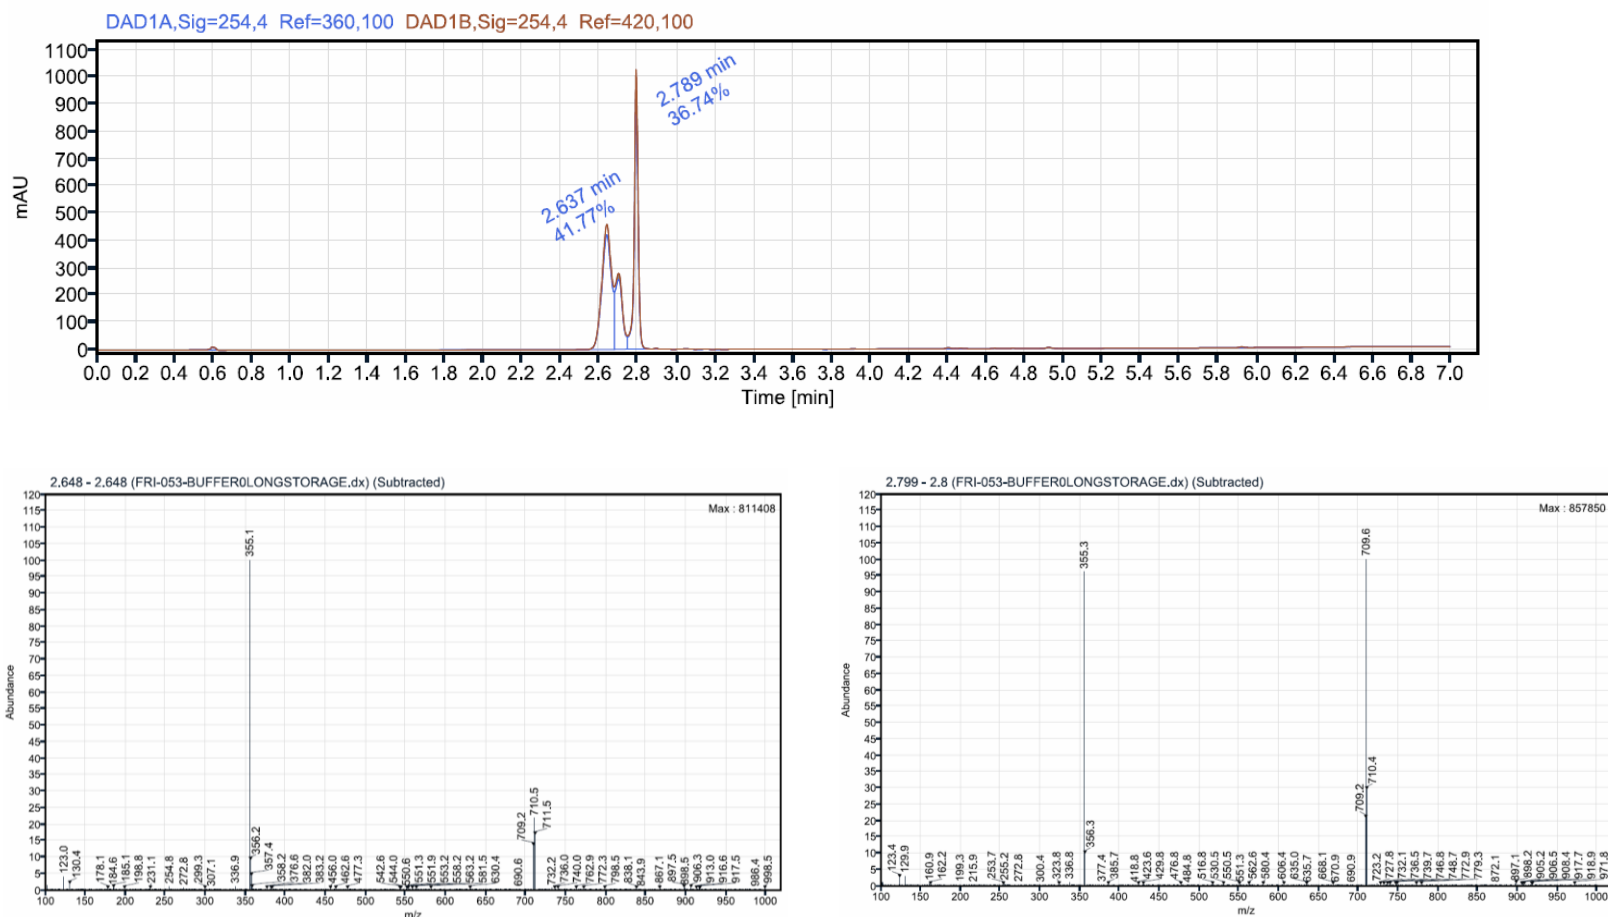

Figure S190. LC-MS results for 5g-1 after ~3 months.

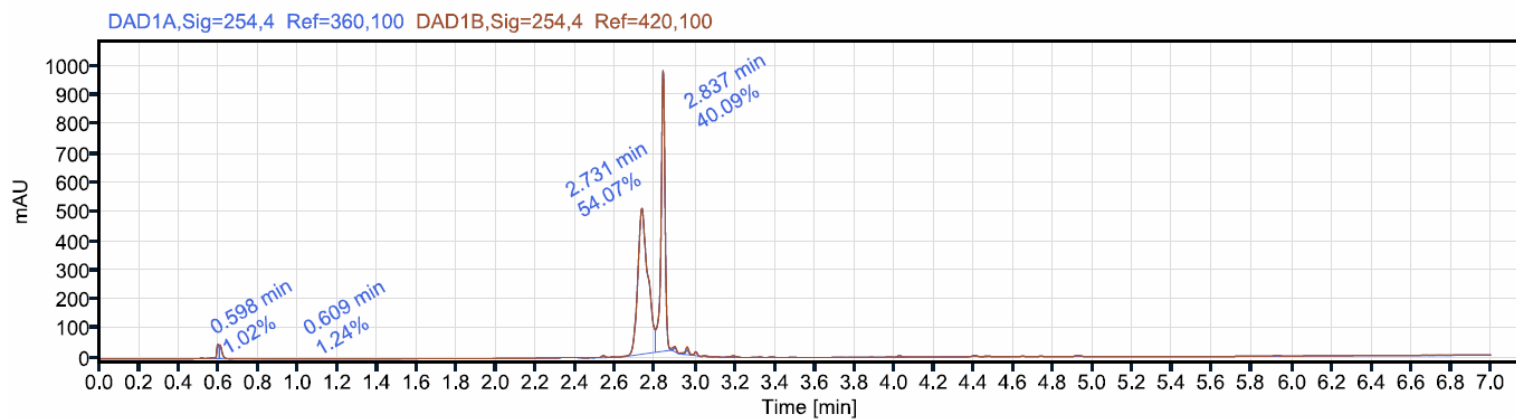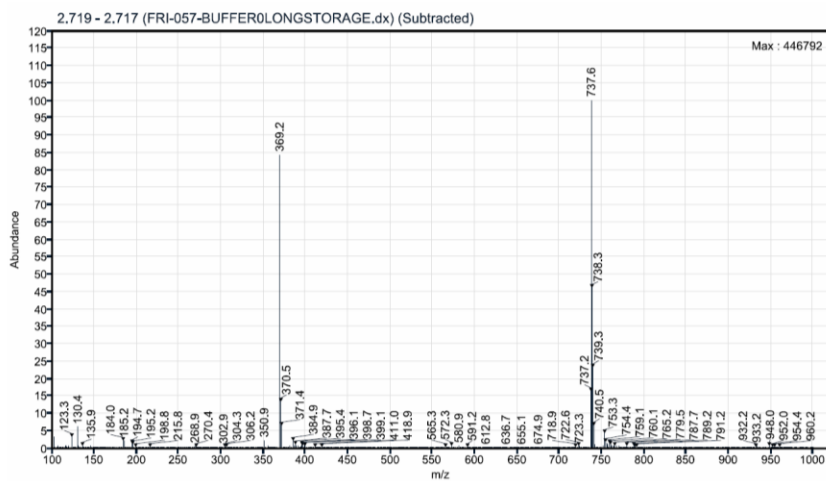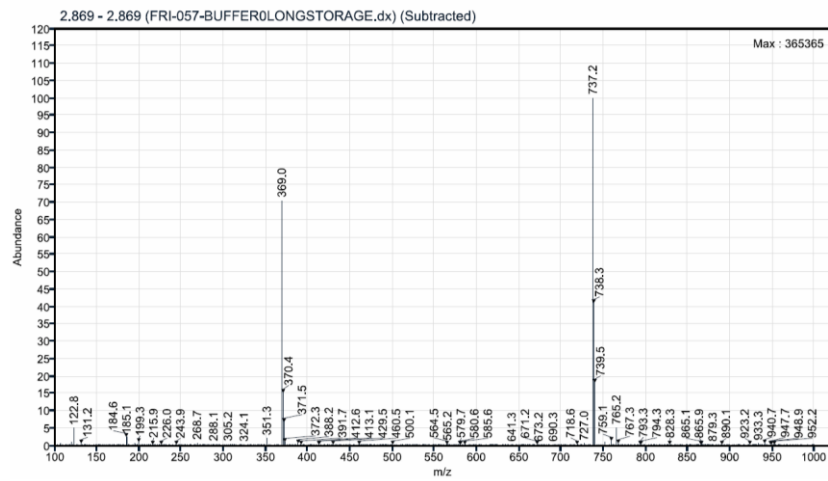

Figure S191. LC-MS results for **51-2** after ~3 months.

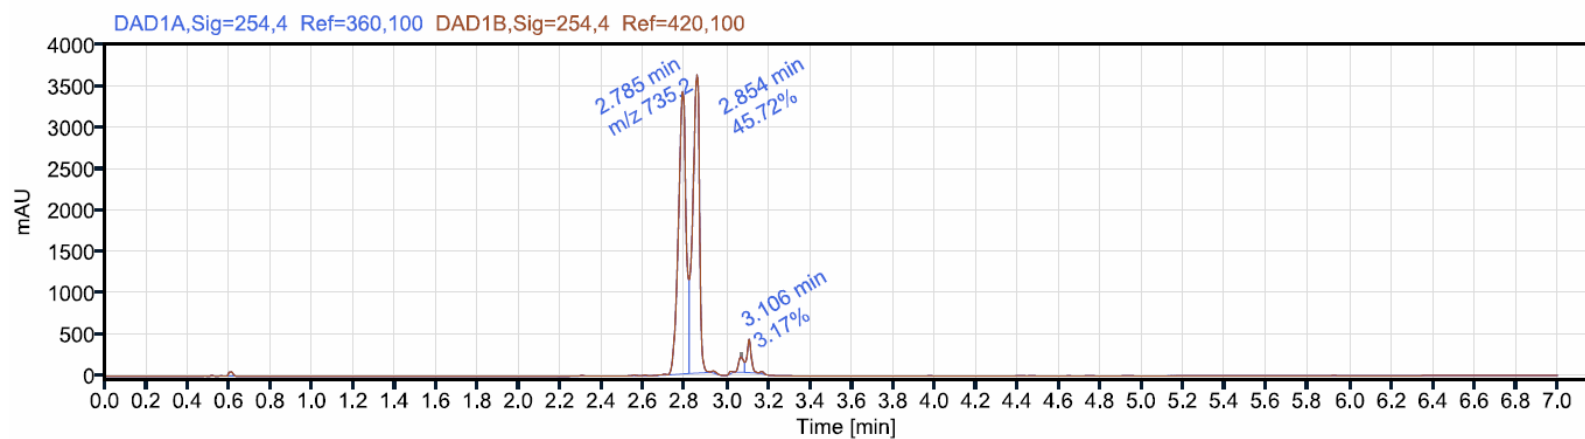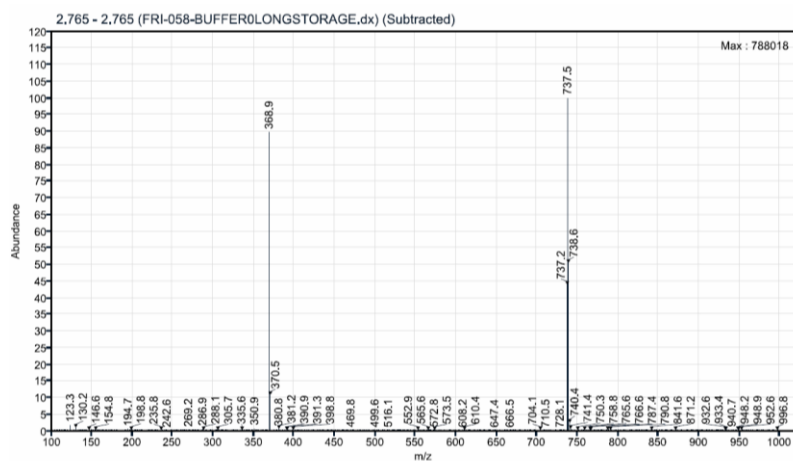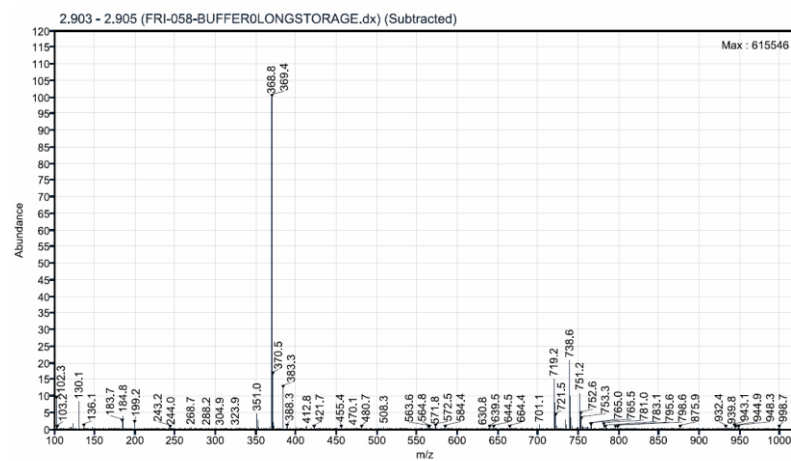

Figure S192. LC-MS results for 5l-1 after ~3 months.

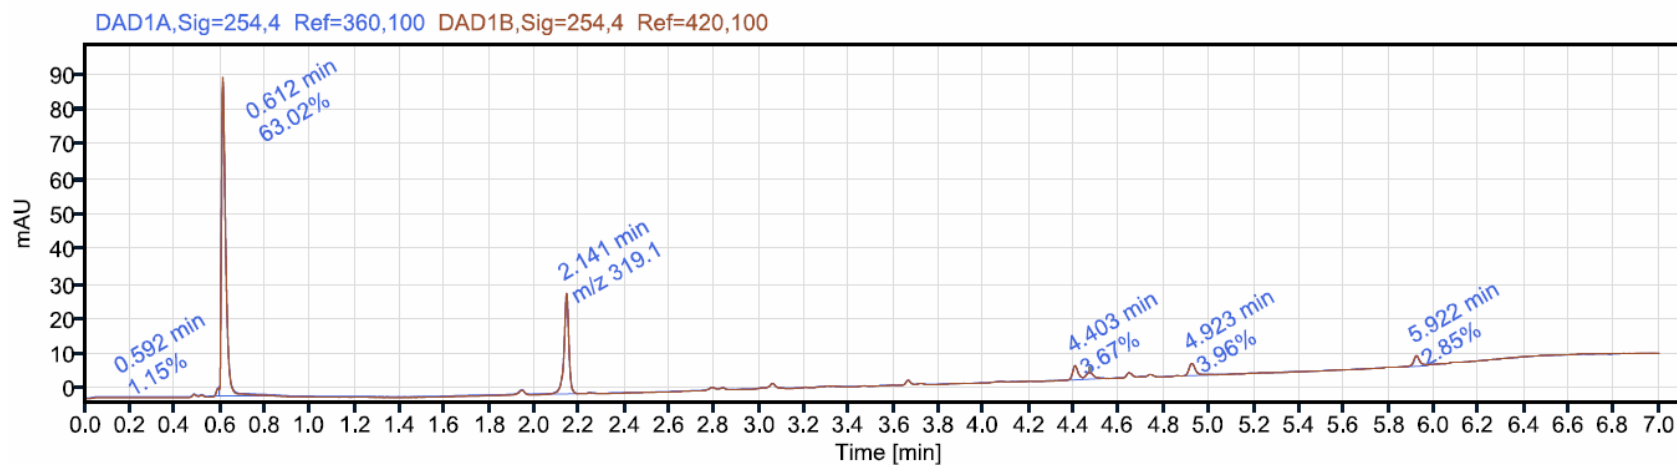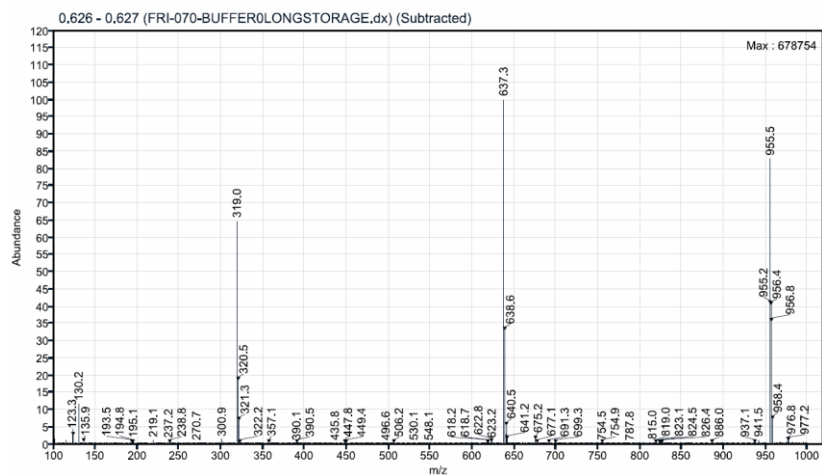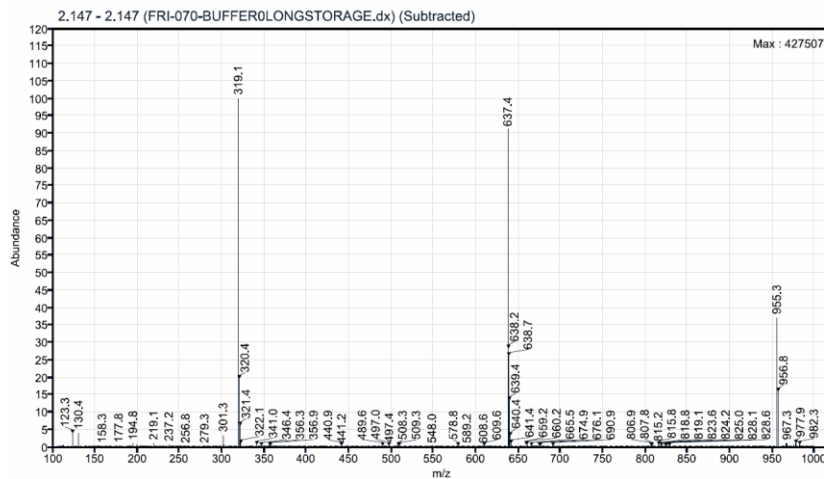

Figure S193. LC-MS results for **5j-1** after ~3 months.

#### 14. References

1. Sievers, F.; Wilm, A.; Dineen, D.; Gibson, T. J.; Karplus, K.; Li, W.; Lopez, R.; McWilliam, H.; Remmert, M.; Söding, J.; Thompson, J. D.; Higgins, D. G., Fast, scalable generation of high-quality protein multiple sequence alignments using Clustal Omega. *Mol. Syst. Biol.* **2011**, 7 (1), 539.
2. Williamson, M. P., Using chemical shift perturbation to characterise ligand binding. *Progr. Nucl. Magn. Reson. Spectr.* **2013**, 73, 1-16.
3. Fielding, L., NMR methods for the determination of protein-ligand dissociation constants. *Curr. Top Med. Chem.* **2003**, 3 (1), 39-53.
